# Supplementary material for: Differences in the Transcriptional Response to Fulvestrant and Estrogen Deprivation in ER-Positive Breast Cancer
Source: Oxford University Press journal article supplement (doi:10.1158/1078-0432.ccr-13-1378), 2014-06-11
Supplement: 10780432ccr131378-sup-tab2.xlsx [file 10780432ccr131378-sup-tab2.xlsx]

## Sheet: F vs C (CLINICAL PROBES=1714)
Illumina Probe ID	Gene Symbol	Corrected p-value (Post- vs. Pre-Fulvestrant)	Fold-Change (Post- vs. Pre-Fulvestrant)
ILMN_1699214	LOC647450	0.0186545	2.10529
ILMN_1739508	LOC652493	0.0218928	2.06676
ILMN_1810172	SFRP4	0.010149	2.06053
ILMN_1766914	MFAP4	0.0131136	2.05799
ILMN_1812461	WISP2	0.00488005	2.04958
ILMN_1758895	CTSK	0.00532526	2.00475
ILMN_1664464	PTGDS	0.0134435	1.93447
ILMN_1712046	CPXM1	0.0136164	1.88585
ILMN_1801205	GPNMB	0.00407884	1.85143
ILMN_1791447	CXCL12	0.0091529	1.84506
ILMN_1672536	FBLN1	0.0131977	1.81253
ILMN_1790529	LUM	0.021857	1.77018
ILMN_1718182	THRA	0.0118731	1.75402
ILMN_1707070	PCOLCE	0.00239168	1.74805
ILMN_1801307	TNFSF10	0.00649919	1.7414
ILMN_1765557	OLFML2B	0.0129943	1.72905
ILMN_1680339	PDGFRL	0.0100785	1.71722
ILMN_1652826	LRRC17	0.0114187	1.68431
ILMN_1689088	COLEC12	0.00130002	1.67407
ILMN_1791890	SPON1	0.0211509	1.66306
ILMN_1808405	HLA-DQA1	0.0424803	1.65475
ILMN_1722898	SFRP2	0.0238412	1.64328
ILMN_1781626	C1S	0.0183844	1.63854
ILMN_1739496	PRRX1	0.00854231	1.638
ILMN_1782538	VIM	0.00386327	1.63763
ILMN_1752728	FUCA1	0.00246455	1.63416
ILMN_1809928	COL6A2	0.0117497	1.62937
ILMN_1796734	SPARC	0.00414439	1.61909
ILMN_1733998	DHRS9	0.00709806	1.61082
ILMN_1679809	GSTP1	0.018267	1.6103
ILMN_1785071	SEPP1	0.0109641	1.6097
ILMN_1682332	GYPC	0.0049998	1.60475
ILMN_1773079	COL3A1	0.0155297	1.60348
ILMN_1676563	HTRA1	0.0153036	1.60122
ILMN_1768227	DCN	0.0277534	1.59706
ILMN_1785272	COL1A2	0.0265424	1.59558
ILMN_1726589	CD248	0.00825987	1.58699
ILMN_1708107	DPT	0.0400995	1.58336
ILMN_1795251	SPARCL1	0.0127081	1.58053
ILMN_1713182	LOC653879	0.0284162	1.57944
ILMN_1710734	GZMK	0.0467672	1.57365
ILMN_1802654	GLT8D2	0.00640974	1.57034
ILMN_1684306	S100A4	0.0198149	1.56991
ILMN_1772612	ANGPTL2	0.0110264	1.55437
ILMN_1688780	S100A4	0.023932	1.54363
ILMN_1726245	TGFBR2	0.0138165	1.54133
ILMN_1677198	C1R	0.0195791	1.53312
ILMN_1772910	GAS1	0.0244522	1.5265
ILMN_1790859	PLAC9	0.0244522	1.52647
ILMN_1669362	IGFBP6	0.0227007	1.52228
ILMN_1718063	LIPA	0.0318932	1.51967
ILMN_1732151	COL6A1	0.0199123	1.51802
ILMN_1668039	GYPC	0.0118731	1.51317
ILMN_1789505	ITPR1	0.00342427	1.51007
ILMN_1712305	CYBRD1	0.0150802	1.50428
ILMN_1654262	ZMAT3	0.00902021	1.50247
ILMN_1782419	GNG11	0.0119387	1.49695
ILMN_1698019	LGMN	0.0270789	1.49542
ILMN_1722713	FBLN1	0.0360233	1.49374
ILMN_1709486	SRPX	0.0331785	1.49346
ILMN_1654398	RGL1	0.00612506	1.49028
ILMN_1803825	CXCL12	0.00786681	1.48869
ILMN_1808590	GUCY1A3	0.00356203	1.48852
ILMN_1667966	C1orf24	0.00627511	1.48638
ILMN_1844464		0.0499424	1.47958
ILMN_1803213	MXRA5	0.0350365	1.47631
ILMN_1673639	ABI3BP	0.0317406	1.47626
ILMN_1764709	MAFB	0.0179117	1.47463
ILMN_1754660	ZCCHC24	0.0131136	1.47459
ILMN_1658494	C13orf15	0.0119387	1.47375
ILMN_1719641	SMOC2	0.0360233	1.47243
ILMN_1774602	FBLN2	0.0493929	1.47136
ILMN_1809467	VAMP5	0.00836981	1.46279
ILMN_1682993	NKG7	0.0149257	1.46021
ILMN_1760412	SHISA2	0.0100837	1.45935
ILMN_1668345	OAF	0.0137238	1.45309
ILMN_1807042	MARCKS	0.0194622	1.45078
ILMN_1790761	POSTN	0.0195791	1.44252
ILMN_1704985	CYP27A1	0.0269218	1.44095
ILMN_1701731	AKR1B1	0.0362202	1.43905
ILMN_1787265	ZNF503	0.0113062	1.43834
ILMN_1729288	C1QTNF6	0.00838875	1.43794
ILMN_1709348	ALDH1A1	0.0411752	1.43736
ILMN_1695025	CD2	0.0469766	1.43545
ILMN_1814823	FTL	0.0074022	1.43299
ILMN_1727532	OLFML3	0.0317159	1.43258
ILMN_1865764		0.0172901	1.43212
ILMN_1661466	LOC646424	0.0119387	1.43018
ILMN_1682928	CPVL	0.031553	1.4285
ILMN_1779324	GZMA	0.0317159	1.427
ILMN_1701603	ALPL	0.0103319	1.4254
ILMN_1670305	SERPING1	0.032284	1.42328
ILMN_1704154	TNFRSF19	0.0113062	1.42323
ILMN_1753613	HOXA5	0.0147539	1.41863
ILMN_1669032	PPIC	0.0119058	1.41759
ILMN_1678170	MME	0.00939939	1.4166
ILMN_1660923	HCG4	0.0186476	1.41611
ILMN_1744487	C1QTNF5	0.0310738	1.4142
ILMN_1745963	FOLR2	0.0250005	1.40946
ILMN_1810725	FAM129A	0.0176318	1.4093
ILMN_1769615	FLRT2	0.0110295	1.40862
ILMN_1728898	SPINK8	0.0139256	1.4085
ILMN_1776678	GIMAP7	0.0414488	1.40815
ILMN_1696360	CTSB	0.0317159	1.40761
ILMN_1756501	ST6GAL1	0.00794651	1.40612
ILMN_1651826	BASP1	0.0229377	1.40481
ILMN_1680453	ITM2C	0.00867851	1.40161
ILMN_1691860	SPRY1	0.0119387	1.39975
ILMN_1748473	GIMAP4	0.0199649	1.39889
ILMN_1676924	CD247	0.0362476	1.39859
ILMN_1651429	SELM	0.034336	1.39733
ILMN_1780799	ENPP2	0.0418898	1.39575
ILMN_1873034		0.0229535	1.3915
ILMN_1765446	EMP3	0.0215744	1.39097
ILMN_1766054	ABCA1	0.00282214	1.38856
ILMN_1651680	LOC649150	0.0315975	1.38644
ILMN_1749846	OMD	0.0161587	1.38475
ILMN_1793859	ALDH2	0.0233226	1.38272
ILMN_1706643	COL6A3	0.0290945	1.38249
ILMN_1679262	DPYSL3	0.0418898	1.38222
ILMN_1652631	GLIPR2	0.0466234	1.38177
ILMN_1667081	CCND2	0.00416016	1.37669
ILMN_1664912	IL11RA	0.0441824	1.3747
ILMN_1762106	MMP2	0.00539169	1.37331
ILMN_1687080	LOC402251	0.0455284	1.37319
ILMN_1811313	SLIT3	0.0259021	1.37109
ILMN_1701441	LPAR1	0.00532526	1.36802
ILMN_1794803	NDP	0.0230917	1.36677
ILMN_1760338	LOC643357	0.023932	1.36529
ILMN_1763452	EVI2B	0.0356534	1.36523
ILMN_1787567	TSC22D1	0.0133814	1.36498
ILMN_1769383	GIMAP5	0.0178508	1.36401
ILMN_1658835	CAV2	0.0259917	1.36326
ILMN_1810782	SH3KBP1	0.0091529	1.36115
ILMN_1789614	TPT1	0.0119591	1.36019
ILMN_1776151	OLFML1	0.0083459	1.35934
ILMN_1781580	BRI3	0.0425392	1.35859
ILMN_1651610	LOC730525	0.0397813	1.35672
ILMN_1779252	TRIM22	0.0227461	1.35526
ILMN_1762436	UBB	0.0244615	1.35476
ILMN_1715635	ATP6V0E1	0.0119387	1.35453
ILMN_1685122	COL9A2	0.0332551	1.35434
ILMN_1854469		0.0356385	1.35372
ILMN_1666444	RBMS1	0.0149257	1.35238
ILMN_1777378	COMMD6	0.0237419	1.35025
ILMN_1766551	CPA3	0.0416179	1.34861
ILMN_1742789	LPXN	0.0317406	1.34819
ILMN_1699585	BHLHE22	0.00976591	1.34718
ILMN_1810577	RPS4X	0.0398898	1.34708
ILMN_1753279	HNRNPA0	0.00784149	1.34626
ILMN_1655611	TSHZ2	0.046469	1.34362
ILMN_1788108	TXNDC5	0.00598264	1.34356
ILMN_1719986	PIK3IP1	0.00690448	1.34297
ILMN_1687652	TGFB3	0.0420808	1.34273
ILMN_1740466	FAM46A	0.0381168	1.34091
ILMN_1726030	GPX7	0.0139256	1.33785
ILMN_1656951	APCDD1	0.0279569	1.33617
ILMN_1732296	ID3	0.0201696	1.33129
ILMN_1732197	MN1	0.00850358	1.33014
ILMN_1720285	ESD	0.0136164	1.328
ILMN_1768940	COL15A1	0.0441824	1.32738
ILMN_1674160	BIN1	0.030282	1.32572
ILMN_1724139	TMEM123	0.0137998	1.3238
ILMN_1689456	ZBTB20	0.0169131	1.32172
ILMN_1667430	DEGS1	0.00682682	1.32075
ILMN_1713807	MAN1C1	0.0118623	1.3201
ILMN_1795442	LAMA4	0.0147539	1.31976
ILMN_1810810	EEF1A1	0.0197446	1.31905
ILMN_2038774	EEF1A1	0.03429	1.3166
ILMN_1705442	CMTM3	0.0350365	1.31627
ILMN_1655469	TSPAN3	0.0186545	1.31492
ILMN_1777660	RNF144	0.0199123	1.31489
ILMN_1704369	LIMA1	0.00353442	1.31427
ILMN_1796458	GABARAPL2	0.0119058	1.3142
ILMN_1750507	RPL9	0.010891	1.31147
ILMN_1731287	ARFGAP3	0.000690971	1.31139
ILMN_1651554	RGS5	0.0206751	1.3113
ILMN_1809291	TSPAN7	0.0341223	1.30974
ILMN_1812926	ANTXR2	0.0317406	1.30938
ILMN_1656537	SNRPN	0.00661484	1.30823
ILMN_1697420	TINF2	0.00913023	1.30802
ILMN_1767470	SCPEP1	0.0218349	1.30784
ILMN_1733579	EVI2A	0.0177518	1.30754
ILMN_1713934	LITAF	0.0420084	1.3065
ILMN_1807359	CLEC11A	0.0441824	1.30643
ILMN_1702247	CCNDBP1	0.00661484	1.30475
ILMN_1694398	EIF3F	0.0498054	1.30472
ILMN_1765258	HLA-E	0.0285061	1.30362
ILMN_1805395	LTBP3	0.0186545	1.30101
ILMN_1686555	FYN	0.00590065	1.30065
ILMN_1667295	VASN	0.0360233	1.29811
ILMN_1708041	PLEKHF1	0.0250005	1.2965
ILMN_1772706	C10orf32	0.0159841	1.29355
ILMN_1699574	NRP1	0.0118623	1.29297
ILMN_1770084	TACC1	0.0479467	1.29275
ILMN_1790692	GNLY	0.0161081	1.29273
ILMN_1741003	ANXA5	0.0411752	1.29184
ILMN_1779071	FEZ1	0.0311608	1.29091
ILMN_1677567	EPYC	0.0416179	1.29046
ILMN_1714820	ITGB1	0.0485535	1.28911
ILMN_1687583	CAV1	0.0299388	1.28849
ILMN_1717674	PEPD	0.0253431	1.28745
ILMN_1671404	SVIL	0.0161587	1.28738
ILMN_1800659	PGM1	0.0430438	1.28736
ILMN_1684349	IL2RB	0.0487042	1.28687
ILMN_1753547	STAT5A	0.0282853	1.28679
ILMN_1790098	OGN	0.0317159	1.28664
ILMN_1729318	TOR1AIP1	0.0074022	1.28396
ILMN_1815719	PLCG2	0.0229873	1.28352
ILMN_1810729	UBL3	0.0129928	1.28175
ILMN_1808501	SH3KBP1	0.0362886	1.28093
ILMN_1679826	CST7	0.0131136	1.27946
ILMN_1769433	IQGAP2	0.00266324	1.27585
ILMN_1765858	CAB39	0.0119865	1.27528
ILMN_1680624	CREG1	0.0317159	1.27392
ILMN_1665235	CRTAP	0.0350365	1.27355
ILMN_1803094	PDGFD	0.01325	1.27289
ILMN_1683678	SPATS2L	0.0253744	1.27087
ILMN_1780898	PRKCH	0.00258525	1.27063
ILMN_1737025	PLCL2	0.0161587	1.26983
ILMN_1810910	CFH	0.0192058	1.26892
ILMN_1790881	HNMT	0.041968	1.26805
ILMN_1676099	SPON2	0.0119387	1.26748
ILMN_1703487	LMO4	0.0434153	1.26738
ILMN_1796339	PLEKHA2	0.0231961	1.2673
ILMN_1679929	KLF13	0.00407884	1.26641
ILMN_1774982	CDC42EP5	0.0417373	1.26627
ILMN_1806908	PRKCB1	0.0494122	1.26551
ILMN_1658333	ECM1	0.0279569	1.26541
ILMN_1695432	TPST2	0.0311516	1.26465
ILMN_1704084	CMAH	0.0203049	1.26436
ILMN_1656560	PARM1	0.0442109	1.26383
ILMN_1678493	CHN1	0.0185235	1.26129
ILMN_1651950	TPST1	0.0418898	1.26052
ILMN_1773650	LRRN3	0.00838875	1.26013
ILMN_1777998	ARHGAP25	0.0280723	1.25963
ILMN_1706969	BEND6	0.0129928	1.25857
ILMN_1667361	COPZ2	0.0223529	1.25834
ILMN_1691575	SNX2	0.0273237	1.25739
ILMN_1654109	EGFLAM	0.0296671	1.25616
ILMN_1674522	HIGD1A	0.0174899	1.25565
ILMN_1658399	KLRG1	0.0130194	1.25506
ILMN_1753342	SAT1	0.0223161	1.25506
ILMN_1741021	CH25H	0.015878	1.25505
ILMN_1800354	CST3	0.0277534	1.25443
ILMN_1733675	MPP1	0.0439925	1.25372
ILMN_1673282	LAMP2	0.0368802	1.25335
ILMN_1845086		0.0418898	1.2529
ILMN_1788783	TRAM2	0.0100785	1.25223
ILMN_1726981	VEGFB	0.0397996	1.25177
ILMN_1698367	CD84	0.0329873	1.25154
ILMN_1665280	SPCS1	0.0188484	1.25107
ILMN_1690703	C21orf34	0.032499	1.25093
ILMN_1796349	SMPDL3A	0.0312563	1.24963
ILMN_1800912	ZFP106	0.0117021	1.24879
ILMN_1724422	SELL	0.0329873	1.24868
ILMN_1659753	LAMP2	0.0279569	1.24746
ILMN_1658830	C10orf26	0.00665574	1.24729
ILMN_1751326	FAM162B	0.0423223	1.24712
ILMN_1790052	MMP23A	0.039696	1.24692
ILMN_1667239	INPP1	0.024498	1.24689
ILMN_1656373	BNC2	0.00450756	1.24686
ILMN_1683146	FTH1	0.0318494	1.24674
ILMN_1718961	BNIP3L	0.0259358	1.24633
ILMN_1762747	RPL15	0.030282	1.2455
ILMN_1657857	TMEM14C	0.0469766	1.24503
ILMN_1779014	TSPYL1	0.0259358	1.24471
ILMN_1752046	SH2B3	0.027589	1.24315
ILMN_1787981	MFAP2	0.0383581	1.24314
ILMN_1740572	TCN2	0.0269202	1.24293
ILMN_1728676	KIAA0196	0.00772962	1.2428
ILMN_1743367	FZD4	0.0465488	1.24125
ILMN_1655740	SNAI2	0.00304955	1.24057
ILMN_1680208	LOC284821	0.0215268	1.24016
ILMN_1812191	C12orf57	0.0278755	1.24008
ILMN_1657803	CFH	0.0495709	1.23848
ILMN_1718621	TSPAN32	0.0354514	1.23744
ILMN_1665761	BCL11B	0.012842	1.23711
ILMN_1749868	FAM171A1	0.0466647	1.23626
ILMN_1718988	DAZAP2	0.0269218	1.23533
ILMN_1775566	ATP1A1	0.0119591	1.23425
ILMN_1761322	FHOD3	0.027589	1.23301
ILMN_1794190	CCPG1	0.00112102	1.23166
ILMN_1713031	PGCP	0.00838875	1.23163
ILMN_1740180	SNX3	0.0457778	1.23163
ILMN_1731233	GZMH	0.0188674	1.23157
ILMN_1767006	PSMB8	0.0208416	1.23153
ILMN_1672366	PIGY	0.034981	1.23077
ILMN_1764723	SH3PXD2B	0.0360233	1.23057
ILMN_1801441	RFTN2	0.0185235	1.22971
ILMN_1720511	LRRN1	0.0152337	1.22873
ILMN_1738816	FOXO1	0.028315	1.22798
ILMN_1713496	ST3GAL5	0.0195791	1.22707
ILMN_1793990	ID2	0.0270789	1.22607
ILMN_1674661	CIRBP	0.0360544	1.22594
ILMN_1699160	ITK	0.0485393	1.22554
ILMN_1805448	EPB41L2	0.0405651	1.22549
ILMN_1785202	STAT4	0.0455284	1.22513
ILMN_1685441	ASAP3	0.0290945	1.22428
ILMN_1669424	LOC646531	0.0339991	1.22407
ILMN_1751143	C7orf23	0.00860201	1.22286
ILMN_1772261	GLG1	0.00867851	1.22223
ILMN_1676528	BTN3A2	0.0186195	1.22213
ILMN_1784207	C1orf128	0.00050549	1.22144
ILMN_1806692	HEXB	0.0166156	1.22092
ILMN_1809483	HSD17B14	0.00645247	1.22056
ILMN_1864685		0.024496	1.22012
ILMN_1742887	LOC645058	0.0182175	1.21912
ILMN_1733094	STEAP1	0.0119387	1.2186
ILMN_1671554	LPIN1	0.02707	1.21772
ILMN_1743145	ERAP2	0.034336	1.21612
ILMN_1654441	OAT	0.023932	1.21593
ILMN_1758315	SLC9A9	0.0251404	1.21497
ILMN_1786823	ICAM2	0.0349888	1.21497
ILMN_1777397	MSX1	0.0278755	1.21493
ILMN_1715662	CCDC80	0.0434153	1.21399
ILMN_1736757	GNPTAB	0.0278101	1.21318
ILMN_1707475	UBE2E2	0.0490321	1.21305
ILMN_1707232	EBF3	0.0220821	1.21272
ILMN_1782621	RPS12	0.03381	1.21096
ILMN_1688775	METRNL	0.0189732	1.20928
ILMN_1669033	NCOA1	0.0158555	1.20843
ILMN_1706511	TEF	0.0121056	1.20775
ILMN_1697597	KIAA0494	0.0211147	1.20748
ILMN_1756360	RPL35A	0.0255135	1.20496
ILMN_1652128	LMBRD1	0.0311389	1.20446
ILMN_1729208	NGFRAP1	0.046469	1.20438
ILMN_1703108	UBE2L6	0.0315975	1.20437
ILMN_1743032	CTSS	0.0270789	1.20398
ILMN_1743299	PXMP3	0.0138165	1.20382
ILMN_1739582	HOXA9	0.0471437	1.20378
ILMN_1654210	CD1C	0.0177269	1.20377
ILMN_1744937	PTPRM	0.0498054	1.20351
ILMN_1667893	TNS3	0.0390412	1.20281
ILMN_1790014	METRNL	0.00610286	1.20182
ILMN_1864900	MIAT	0.00245288	1.20178
ILMN_1695590	ADRB2	0.0132509	1.20167
ILMN_1739586	FEZ2	0.0431747	1.20153
ILMN_1781819	PAPSS1	0.017364	1.20146
ILMN_1660000	SNURF	0.0461424	1.20075
ILMN_1662617	PPP2R3C	0.015406	1.19925
ILMN_1655904	ROR1	0.0145693	1.19924
ILMN_1672417	PTPRCAP	0.0390062	1.19914
ILMN_1706326	MRPL33	0.0100813	1.19714
ILMN_1741727	QPCT	0.0154191	1.19686
ILMN_1723358	SCARA3	0.0259914	1.19679
ILMN_1767360	IL10RB	0.0265424	1.19656
ILMN_1656111	MYLIP	0.039692	1.19382
ILMN_1695276	MAPRE2	0.00649919	1.19366
ILMN_1732678	KERA	0.0129928	1.19361
ILMN_1778173	AK3	0.028315	1.19324
ILMN_1669376	DRAM1	0.0369376	1.19256
ILMN_1684468	CILP2	0.0377285	1.1925
ILMN_1783946	MRC2	0.0201696	1.19246
ILMN_1696432	IDH1	0.0174899	1.1921
ILMN_1722855	VEGFB	0.0282853	1.19106
ILMN_1759513	RND3	0.041968	1.19036
ILMN_1812297	CYP26B1	0.0150802	1.18955
ILMN_1735743	FBLN7	0.0385706	1.18867
ILMN_1744665	EP300	0.00161646	1.18842
ILMN_1808299	IQSEC1	0.00662327	1.1882
ILMN_1798926	SOCS2	0.0201696	1.18785
ILMN_1660498	RPS27	0.0417373	1.18763
ILMN_1788457	ABCC4	0.0415627	1.18657
ILMN_1858599		0.0150802	1.18655
ILMN_1669447	PYHIN1	0.0215268	1.18495
ILMN_1697491	FLJ14213	0.00484332	1.18475
ILMN_1808860	STX5	0.0493198	1.18338
ILMN_1656791	RPS6	0.0330226	1.18288
ILMN_1715555	DBP	0.0189153	1.18121
ILMN_1684051	WASF2	0.0263942	1.18001
ILMN_1786429	P2RY5	0.024572	1.17996
ILMN_1801610	METRNL	0.0152897	1.17923
ILMN_1722276	PAFAH1B1	0.00383257	1.17894
ILMN_1745076	CLINT1	0.014995	1.17892
ILMN_1664051	SEC22C	0.018055	1.17866
ILMN_1764500	C3orf10	0.0333164	1.17821
ILMN_1703697	LANCL1	0.0273805	1.17798
ILMN_1740633	PRF1	0.0170348	1.17745
ILMN_1704554	LOC648470	0.0185235	1.17743
ILMN_1674941	ANO6	0.0388538	1.17668
ILMN_1692177	TSC22D1	0.0344791	1.17637
ILMN_1693310	ITFG1	0.0310626	1.17617
ILMN_1665887	WDR61	0.0350907	1.17604
ILMN_1663416	LOC642250	0.0409964	1.1755
ILMN_1653026	PLAC8	0.0458079	1.17529
ILMN_1715886	CNOT7	0.0181329	1.17523
ILMN_1784320	ELMO1	0.0487042	1.17374
ILMN_1703374	NAV1	0.00939939	1.1735
ILMN_1791123	TMPRSS2	0.0492101	1.17304
ILMN_1815121	PLAGL1	0.040011	1.17261
ILMN_1758673	SLC44A1	0.0311516	1.17212
ILMN_1906187		0.0199123	1.172
ILMN_1711069	YPEL5	0.0131977	1.17155
ILMN_1783709	RRAGA	0.0119058	1.1715
ILMN_1719696	PLD1	0.0185235	1.17048
ILMN_1737089	CAPN5	0.0349888	1.17026
ILMN_1781700	IL18R1	0.00590608	1.17024
ILMN_1745415	BBX	0.0242502	1.16958
ILMN_1681845	PAPD4	0.0431179	1.16948
ILMN_1747577	ALAD	0.0379288	1.16813
ILMN_1778203	CLN5	0.0261996	1.16788
ILMN_1661646	BANK1	0.0379844	1.16694
ILMN_1683148	PRICKLE2	0.0419386	1.16692
ILMN_1672405	TMED7	0.0350365	1.16623
ILMN_1689908	ANKRD13A	0.00860201	1.16605
ILMN_1760245	TMEM42	0.0379181	1.16599
ILMN_1699525	SRI	0.0309531	1.16502
ILMN_1804419	LRMP	0.0320185	1.16445
ILMN_1708340	DAPK1	0.0364587	1.16321
ILMN_1655622	PRKRIR	0.0498054	1.1632
ILMN_1669015	XPNPEP1	0.0271509	1.16263
ILMN_1768282	SNX21	0.0390062	1.16228
ILMN_1808657	FMO3	0.0470696	1.16185
ILMN_1737604	FLJ10986	0.0265424	1.16158
ILMN_1715569	CCDC53	0.0445147	1.16147
ILMN_1677829	SLC9A6	0.00736937	1.16038
ILMN_1730995	AFAP1L2	0.0227953	1.15999
ILMN_1702226	C21orf34	0.00534868	1.15991
ILMN_1708779	GNLY	0.015629	1.15982
ILMN_1722294	CPNE8	0.0119058	1.15959
ILMN_1700518	HMGN4	0.0418898	1.15945
ILMN_1702168	HSD17B12	0.0492101	1.15933
ILMN_1802027	MGST2	0.0229654	1.15885
ILMN_1719344	LOC730820	0.0317159	1.15807
ILMN_1730347	CCDC115	0.0182175	1.15753
ILMN_1768812	FXYD6	0.0381168	1.15735
ILMN_1668582	CRBN	0.00825987	1.15693
ILMN_1916256		0.0481266	1.15597
ILMN_1736103	ITPR2	0.0466647	1.15551
ILMN_1746763	ECM2	0.0174088	1.15367
ILMN_1679655	WDR82	0.0270789	1.15335
ILMN_1739170	TM4SF18	0.0290945	1.15314
ILMN_1705892	SH2D1A	0.0385558	1.15273
ILMN_1693233	KIAA0513	0.0193797	1.15262
ILMN_1752668	DAAM2	0.0126947	1.15241
ILMN_1719756	ZAP70	0.0483167	1.15214
ILMN_1752117	TMEM55A	0.0116664	1.15171
ILMN_1727466	KCNMB4	0.0199123	1.15134
ILMN_1695354	BMF	0.0297068	1.15091
ILMN_1683313	ST3GAL1	0.0495438	1.14976
ILMN_1796377	C14orf37	0.00286435	1.14875
ILMN_1651735	TGOLN2	0.0263537	1.14815
ILMN_1677429	TWIST2	0.00386327	1.14786
ILMN_1690209	C1orf186	0.0344791	1.14765
ILMN_1666545	GCNT1	0.0407096	1.14754
ILMN_1797604	CAP1	0.0282853	1.14716
ILMN_1724959	SEC31A	0.039077	1.14553
ILMN_1770768	SLAMF1	0.00926499	1.1448
ILMN_1726755	COPS4	0.0198337	1.14419
ILMN_1792689	HIST1H2AC	0.0286917	1.14404
ILMN_1780598	PIAS1	0.000936351	1.14378
ILMN_1783889	PRKAA1	0.0165094	1.14308
ILMN_1795893	TMEM167B	0.0326388	1.14305
ILMN_1714397	CRYL1	0.0274135	1.1427
ILMN_1700628	DDX24	0.0223867	1.14247
ILMN_1812070	ABCB1	0.0474182	1.14238
ILMN_1772702	SFRS2B	0.015741	1.14211
ILMN_1735347	MCEE	0.0493714	1.14172
ILMN_1756408	PARVA	0.0354119	1.1412
ILMN_1755391	ARL2BP	0.0186545	1.14108
ILMN_1808898	NPR2	0.0237754	1.14105
ILMN_1682774	C13orf27	0.0186545	1.14065
ILMN_1671837	LOC644739	0.00534868	1.14036
ILMN_1659054	CHKB	0.0201696	1.13974
ILMN_1761084	FNDC5	0.0116821	1.13955
ILMN_1658526	RYK	0.0338497	1.1386
ILMN_1805064	SCARNA9	0.0468015	1.13859
ILMN_1862909		0.0119387	1.13851
ILMN_1796762	CCDC102A	0.0314968	1.13825
ILMN_1694742	RPS29	0.0136164	1.13812
ILMN_1727815	CFI	0.0114759	1.13799
ILMN_1746396	CTNNB1	0.0253631	1.13784
ILMN_1735438	GPM6B	0.0259917	1.13746
ILMN_1736704	DIXDC1	0.0285235	1.1366
ILMN_1767612	BBS2	0.0273488	1.1352
ILMN_1721762	IL18RAP	0.0282853	1.13501
ILMN_1690546	PPP3CC	0.00228875	1.13429
ILMN_1691339	CLEC1A	0.0189689	1.13371
ILMN_1780699	THAP11	0.0453556	1.13353
ILMN_1714527	VAMP3	0.0405917	1.13318
ILMN_1766798	CENTB2	0.00649919	1.13253
ILMN_1791912	SIDT2	0.0483175	1.13252
ILMN_1654735	SLCO3A1	0.0131977	1.13233
ILMN_1681984	GALNT10	0.0418898	1.13224
ILMN_1652230	LOC647361	0.0483175	1.1318
ILMN_1721704	FNTA	0.0311514	1.13171
ILMN_1659158	SAMD3	0.0129592	1.13142
ILMN_1664424	ZBED5	0.0416179	1.13109
ILMN_1685415	HBP1	0.0497639	1.13092
ILMN_1666004	WASL	0.024496	1.13064
ILMN_1717099	DSCR3	0.0347934	1.13062
ILMN_1762003	SEC62	0.0200676	1.12935
ILMN_1763638	BCAR3	0.0306768	1.12896
ILMN_1786766	SNTB2	0.0276569	1.12841
ILMN_1682910	SLC35B3	0.0202209	1.12836
ILMN_1666502	SOBP	0.00926499	1.12827
ILMN_1765044	CUTC	0.0100785	1.12743
ILMN_1784083	IGDCC4	0.0107289	1.12739
ILMN_1674344	PARD6G	0.00556344	1.12703
ILMN_1740171	DUSP11	0.0341223	1.12646
ILMN_1660806	CSRP2	0.0478983	1.12628
ILMN_1767642	C11orf46	0.0379288	1.12626
ILMN_1700067	BTN3A2	0.0121576	1.12623
ILMN_1668605	NAAA	0.0190453	1.12612
ILMN_1815679	LOC131873	0.0441266	1.12553
ILMN_1737964	HIATL1	0.0420808	1.12549
ILMN_1733690	AKAP7	0.0331785	1.12521
ILMN_1807925	GNG2	0.00658	1.12465
ILMN_1738491	SNX30	0.018903	1.12374
ILMN_1705984	HNMT	0.0132383	1.12372
ILMN_1695829	TTYH2	0.0381095	1.12307
ILMN_1690839	PPAPDC3	0.0311389	1.1226
ILMN_1779530	COG6	0.0291794	1.12247
ILMN_1757350	CTNNB1	0.0256867	1.12188
ILMN_1700432	ITPKB	0.031356	1.12187
ILMN_1662973	CD82	0.00488005	1.12154
ILMN_1680171	MFF	0.0131111	1.12152
ILMN_1812278	LY9	0.0137499	1.12107
ILMN_1733666	PLDN	0.0481266	1.12102
ILMN_1687743	BTBD7	0.00571916	1.12046
ILMN_1804629	TPK1	0.0326388	1.12023
ILMN_1676215	DLG2	0.0339192	1.12011
ILMN_1776363	ANK2	0.0201696	1.11908
ILMN_1680673	NT5DC1	0.0183237	1.11847
ILMN_1782761	ARHGAP20	0.0215268	1.11843
ILMN_1665859	RAB27A	0.00278987	1.11842
ILMN_1657423	SPG21	0.0311608	1.11802
ILMN_1811836	DYNC2LI1	0.0330896	1.11779
ILMN_1762115	CRYZL1	0.0250315	1.11774
ILMN_1697503	DHX29	0.0381551	1.11755
ILMN_1733841	TCF7L1	0.0118612	1.11694
ILMN_1717197	CD3G	0.0470148	1.11626
ILMN_1684402	STXBP5	0.0331785	1.11611
ILMN_1787378	ADD3	0.0204014	1.11598
ILMN_1815445	IDS	0.011687	1.11594
ILMN_1657606	ZFHX4	0.0331785	1.11539
ILMN_1753112	CD5	0.0417373	1.11531
ILMN_1917290		0.0225654	1.11497
ILMN_1812091	FAM20A	0.039696	1.11484
ILMN_1709204	CLEC4A	0.0237754	1.11425
ILMN_1690561	GZMM	0.024572	1.11412
ILMN_1658995	ACOT9	0.0229142	1.11389
ILMN_1778803	ZFAND6	0.0493166	1.11343
ILMN_1758229	QSOX1	0.00913023	1.11332
ILMN_1843932		0.0329873	1.11332
ILMN_1652456	TMEM98	0.023932	1.11259
ILMN_1675268	LRP4	0.00131484	1.11215
ILMN_1751785	DMRT2	0.0317159	1.11196
ILMN_1799134	KLRD1	0.00662327	1.11147
ILMN_1753525	TCEAL7	0.0283929	1.1113
ILMN_1766261	SLC2A12	0.0214559	1.11099
ILMN_1792072	FUT4	0.0317159	1.11048
ILMN_1760593	CRY1	0.0228751	1.10928
ILMN_1795228	ZFAND5	0.0271509	1.10915
ILMN_1846001		0.0385558	1.10903
ILMN_1730986	MALT1	0.0334484	1.10844
ILMN_1724052	LOC730051	0.0131941	1.10769
ILMN_1679268	PELI1	0.040011	1.10754
ILMN_1709101	AKAP13	0.0459958	1.10673
ILMN_1762294	ADAMTSL4	0.0401367	1.10583
ILMN_1750790	GSTM5	0.0206791	1.10539
ILMN_1663538	CLYBL	0.0186545	1.10498
ILMN_1761086	VPS54	0.0339034	1.10479
ILMN_1760374	CD8A	0.022714	1.10478
ILMN_1721580	TBX15	0.0466647	1.10427
ILMN_1751452	NDFIP1	0.0223072	1.10408
ILMN_1720024	IL11RA	0.0271143	1.10398
ILMN_1785406	NAP1L3	0.00964673	1.10354
ILMN_1678652	C10orf61	0.0497639	1.10292
ILMN_1772646	LOC388681	0.0212	1.1028
ILMN_1700923	ATG4C	0.0385558	1.10105
ILMN_1798543	STK17B	0.00825987	1.10087
ILMN_1794442	ZNF469	0.0207991	1.09979
ILMN_1801124	KIAA1826	0.0392633	1.09937
ILMN_1727495	L3MBTL3	0.0311608	1.09936
ILMN_1684943	TRAT1	0.0271729	1.09932
ILMN_1686985	MTM1	0.00490649	1.09902
ILMN_1770963	NAALADL1	0.0285235	1.09876
ILMN_1733311	PIGB	0.0137998	1.09863
ILMN_1719811	REM1	0.0497639	1.09855
ILMN_1673357	SLA2	0.024572	1.09725
ILMN_1696701	LOC344595	0.0369327	1.09645
ILMN_1681678	CTDSP1	0.0472992	1.09547
ILMN_1692535	DPP4	0.00230077	1.09487
ILMN_1753164	IPO8	0.010891	1.09474
ILMN_1705515	UPF3A	0.0272337	1.0947
ILMN_1664016	ARHGEF18	0.024498	1.09341
ILMN_1759883	SRP9	0.0450512	1.09126
ILMN_1719792	PHLDB2	0.0100785	1.09076
ILMN_1741684	SMPD1	0.0129016	1.09062
ILMN_1681008	CGRRF1	0.0359804	1.09049
ILMN_1760314	CCDC8	0.00825987	1.08959
ILMN_1809894	TMEM117	0.0228751	1.08871
ILMN_1799099	TEKT3	0.0110295	1.0871
ILMN_1810797	WASF3	0.0461424	1.08687
ILMN_1775114	ENTPD3	0.042604	1.08583
ILMN_1719606	LOC644762	0.0158439	1.08572
ILMN_1655433	BCKDHB	0.0429644	1.08512
ILMN_1761850	ATRN	0.0466234	1.08501
ILMN_1712088	CLYBL	0.0242502	1.08492
ILMN_1687035	ADAMTSL4	0.0266047	1.08487
ILMN_1792384	HABP4	0.024958	1.08486
ILMN_1766165	SNCA	0.0180569	1.08443
ILMN_1769550	SLFN5	0.038145	1.08441
ILMN_1703886	SLC16A2	0.0272212	1.08439
ILMN_1759792	CLIP4	0.0311389	1.08413
ILMN_1775163	PDE1A	0.024496	1.0838
ILMN_1758542	BMP1	0.0139256	1.08293
ILMN_1783805	PNMA3	0.00532526	1.08285
ILMN_1782851	TAPBP	0.0118623	1.08259
ILMN_1676998	SCN2B	0.0282853	1.08206
ILMN_1714444	KLF12	0.021937	1.08173
ILMN_1764415	ZNF585A	0.0331785	1.08121
ILMN_1716563	PRKCB1	0.0254133	1.0798
ILMN_1728844	PTPRN2	0.0350365	1.07938
ILMN_1760109	SLAMF6	0.0201696	1.07847
ILMN_1663032	FNDC4	0.0361935	1.07805
ILMN_1672135	ZNF615	0.0493166	1.07791
ILMN_1681882	CETP	0.0201696	1.07774
ILMN_1703006	MTCH1	0.0466647	1.07641
ILMN_1767900	LGI2	0.0456343	1.07634
ILMN_1723353	FAM122A	0.0202852	1.07571
ILMN_1757183	LOC650494	0.0258999	1.07519
ILMN_1720623	SYTL3	0.0492219	1.07499
ILMN_1766981	UNC50	0.0354514	1.07445
ILMN_1777221	C21orf51	0.0113062	1.07362
ILMN_1747759	WSB1	0.041968	1.07289
ILMN_1675117	HSD17B11	0.0320787	1.07214
ILMN_1664323	MBIP	0.0440492	1.07213
ILMN_1669177	DHRS12	0.0132012	1.07184
ILMN_1678403	TMEM178	0.0311516	1.07137
ILMN_1799836	HOXA2	0.013713	1.07101
ILMN_1703009	FAM20C	0.0439298	1.07098
ILMN_1690139	KIAA0748	0.0311608	1.06961
ILMN_1762167	GTDC1	0.0478983	1.06959
ILMN_1688372	C3orf17	0.032328	1.06931
ILMN_1694547	IFFO1	0.00764918	1.06905
ILMN_1788531	SIT1	0.00858174	1.06869
ILMN_1774528	GPRC5C	0.00612506	1.06853
ILMN_1661142	TMF1	0.032328	1.06851
ILMN_1662935	C1QTNF7	0.024498	1.06833
ILMN_1747244	CCNG2	0.0487541	1.06775
ILMN_1699552	PDZRN3	0.0492101	1.06767
ILMN_1755203	CUBN	0.0114187	1.06748
ILMN_1679995	MPP6	0.018959	1.06736
ILMN_1783702	MORC3	0.0276569	1.06701
ILMN_1724708	RAB33A	0.0118612	1.06698
ILMN_1733157	THSD1	0.0138165	1.06674
ILMN_1667232	KIR2DL3	0.0270789	1.06659
ILMN_1739756	KIR2DL4	0.00120942	1.06646
ILMN_1658884	ATP11B	0.0133814	1.0663
ILMN_1741281	RNF175	0.00763663	1.06611
ILMN_1813911	HEXA	0.0185235	1.0661
ILMN_1680659	C11orf63	0.0206791	1.06602
ILMN_1687074	CDC14B	0.0324965	1.06551
ILMN_1751439	EMX2	0.00652066	1.06489
ILMN_1811765	ADAMTS2	0.0166615	1.06465
ILMN_1678928	SLCO3A1	0.0166615	1.06449
ILMN_1682996	VWA5A	0.0227461	1.06414
ILMN_1785286	SOCS5	0.0352637	1.06404
ILMN_1705743	FLJ10357	0.0416718	1.06401
ILMN_1692191	GNA12	0.0305805	1.06372
ILMN_1676003	PNOC	0.0317159	1.06352
ILMN_1735157	GALNT12	0.00662317	1.06344
ILMN_1823231		0.00883406	1.06338
ILMN_1741032	HERC3	0.0434153	1.06268
ILMN_1695972	CCDC89	0.0317159	1.06259
ILMN_1703263	SP140	0.0467672	1.06173
ILMN_1761409	ZNF167	0.0366473	1.0617
ILMN_1821270		0.0118623	1.061
ILMN_1689102	C1QTNF6	0.0235193	1.06047
ILMN_1811851	PRRX1	0.00617277	1.06003
ILMN_1704621	WDR44	0.0229023	1.05946
ILMN_1739054	CCDC121	0.0470214	1.05849
ILMN_1702526	C17orf48	0.0426354	1.05847
ILMN_1797988	KLRD1	0.0295174	1.05838
ILMN_1722089	RNF217	0.0354514	1.05723
ILMN_1727992	FEZ1	0.038165	1.05669
ILMN_1787750	CD200	0.0493356	1.05665
ILMN_1871233		0.0091529	1.05645
ILMN_1712859	FAM89A	0.0252571	1.05565
ILMN_1761851	CACNA1A	0.0136822	1.05536
ILMN_1741017	PIP4K2B	0.0397195	1.05444
ILMN_1771084	ACSM3	0.0143094	1.05226
ILMN_1652763	LOC389203	0.0091529	1.05208
ILMN_1821397		0.0478983	1.05115
ILMN_1690476	QKI	0.0210453	1.05113
ILMN_1670912	ACVR2A	0.0478983	1.05058
ILMN_1715863	MLKL	0.0137998	1.05038
ILMN_1796018	NFATC4	0.0132029	1.05026
ILMN_1676296	PPAP2A	0.0290945	1.05003
ILMN_1787555	UNQ6975	0.00640974	1.04979
ILMN_1877068		0.0491321	1.04762
ILMN_1804454	FAM135A	0.0172901	1.04748
ILMN_1874672		0.0317159	1.04748
ILMN_1755983	NFATC3	0.046459	1.04719
ILMN_1776879	HMGN2	0.0315275	1.04706
ILMN_1738976	OR2A20P	0.0215754	1.04659
ILMN_1722698	RCHY1	0.0229142	1.04654
ILMN_1775441	ARHGAP24	0.0233153	1.04612
ILMN_1693466	RABEP2	0.0397196	1.0455
ILMN_1771695	RCBTB2	0.0234811	1.04493
ILMN_1667970	LOC728825	0.0199649	1.04458
ILMN_1781028	ZMYM5	0.0491321	1.04458
ILMN_1684255	MYL4	0.0468551	1.04444
ILMN_1734810	PJA1	0.0406473	1.04422
ILMN_1797753	ARHGAP28	0.0390062	1.04395
ILMN_1786281	ZSCAN12	0.0451882	1.04383
ILMN_1801814	VEGFB	0.0334394	1.04318
ILMN_1724715	MAPK11	0.0478983	1.04309
ILMN_1723232	LOC96610	0.0181155	1.04284
ILMN_1651657	ADAM33	0.0190453	1.04244
ILMN_1793458	LOC652668	0.0492117	1.0423
ILMN_1676383	ENPP6	0.0102362	1.04149
ILMN_1913477		0.0218509	1.04121
ILMN_1807492	LOC643668	0.0350365	1.04116
ILMN_1788059	PCGF5	0.041616	1.04077
ILMN_1672800	FLJ21767	0.041968	1.04064
ILMN_1777444	STX5	0.0350365	1.04063
ILMN_1802761	LOC728505	0.0271729	1.04054
ILMN_1769606	PIWIL4	0.0401866	1.04019
ILMN_1704868	LOC648570	0.0354514	1.03941
ILMN_1661172	LOC650034	0.0463159	1.03781
ILMN_1694569	LOC645100	0.0369327	1.03716
ILMN_1800381	GNAO1	0.0403592	1.03706
ILMN_1789955	PNRC1	0.0200941	1.03646
ILMN_1796847	PITX2	0.0418898	1.03645
ILMN_1715436	LOC650799	0.0134303	1.03501
ILMN_1694404	RASA4	0.0265424	1.03501
ILMN_1792382	KCNC4	0.0475885	1.035
ILMN_1658121	CFP	0.0282853	1.03487
ILMN_1869943		0.00561696	1.03475
ILMN_1821531		0.0403669	1.03328
ILMN_1671051	CD276	0.0478983	1.02985
ILMN_1722034	KIAA1586	0.0220821	1.0288
ILMN_1899960		0.0329874	1.02876
ILMN_1799569	LOC440895	0.0282757	1.02812
ILMN_1808781	PHF12	0.0472979	1.0274
ILMN_1707123	DDX19B	0.0418929	1.02626
ILMN_1813796	TMEM169	0.0311516	1.02577
ILMN_1698311	ABHD12B	0.0107706	1.0254
ILMN_1740505	SGMS1	0.0368436	1.02528
ILMN_1790751	C8orf31	0.0434856	1.02501
ILMN_1805175	TGFA	0.0276569	1.02487
ILMN_1768558	LOC727848	0.0310738	1.02451
ILMN_1659202	B3GALT1	0.0292668	1.0243
ILMN_1684834	LBH	0.0434153	-1.02392
ILMN_1741628	ABL2	0.0470214	-1.0257
ILMN_1742269	LOC642726	0.0419386	-1.0268
ILMN_1780783	SOCS7	0.0492219	-1.02782
ILMN_1703843	RAPH1	0.0275486	-1.03157
ILMN_1753856	ZNF407	0.0393775	-1.03277
ILMN_1801931	USP41	0.0317406	-1.03293
ILMN_1711254	WDR3	0.0316801	-1.0331
ILMN_1651710	IQCD	0.0478983	-1.03324
ILMN_1804283	GNAS	0.00468532	-1.03346
ILMN_1682339	C19orf57	0.0311516	-1.03371
ILMN_1895164		0.0199123	-1.03494
ILMN_1658010	CENPI	0.0225654	-1.03549
ILMN_1723515	VSIG6	0.0311516	-1.03551
ILMN_1913759		0.0493166	-1.03551
ILMN_1779742	GABRD	0.0270789	-1.03624
ILMN_1686043	FAM164C	0.0297737	-1.0363
ILMN_1664679	CADM2	0.0229142	-1.03743
ILMN_1716957	C1QL1	0.0493929	-1.03764
ILMN_1894172		0.0466647	-1.03785
ILMN_1835686		0.0213328	-1.03817
ILMN_1698650	C17orf41	0.0186476	-1.03888
ILMN_1800332	NGB	0.0137998	-1.03919
ILMN_1885628	KSR2	0.0227007	-1.03957
ILMN_1657148	C19orf23	0.0478983	-1.03958
ILMN_1667578	DUSP26	0.047008	-1.03989
ILMN_1688138	ZNF713	0.0177269	-1.0399
ILMN_1783266	OGDH	0.0137998	-1.03991
ILMN_1695601	LOC161527	0.00757866	-1.04434
ILMN_1696038	LOC150051	0.025795	-1.04489
ILMN_1718079	HOXB1	0.0131941	-1.045
ILMN_1701882	LOC653820	0.0355991	-1.04514
ILMN_1756578	CHRNA6	0.00709806	-1.04665
ILMN_1745988	NUDT12	0.0477035	-1.04759
ILMN_1777579	TIGD1	0.042604	-1.04776
ILMN_1789351	SUV39H2	0.0362886	-1.04812
ILMN_1774708	ORMDL2	0.040011	-1.04828
ILMN_1658695	NUF2	0.0393086	-1.04849
ILMN_1747870	CD3EAP	0.00838875	-1.04909
ILMN_1671913	TRMT2A	0.0111247	-1.04911
ILMN_1735179	LOC648434	0.0454771	-1.05039
ILMN_1656372	PES1	0.0451419	-1.05074
ILMN_1768818	LRRC46	0.0360544	-1.05147
ILMN_1747279	ZNF648	0.0360233	-1.05156
ILMN_1891233		0.0491321	-1.05163
ILMN_1680349	RIBC2	0.00948702	-1.05184
ILMN_1659000	XPNPEP3	0.0229535	-1.05392
ILMN_1723743	ROM1	0.0180204	-1.05642
ILMN_1712277	LOC651285	0.0364587	-1.05648
ILMN_1875380		0.0450787	-1.05731
ILMN_1719471	MSH3	0.0143881	-1.0577
ILMN_1654691	FKBP3	0.0459958	-1.06041
ILMN_1697998	FAM54A	0.0212609	-1.0607
ILMN_1707710	SLC6A13	0.0074022	-1.06074
ILMN_1715540	TRAIP	0.0244405	-1.06104
ILMN_1805973	GPR19	0.0393775	-1.06143
ILMN_1787477	CENPO	0.0208585	-1.06216
ILMN_1836550		0.0403669	-1.06241
ILMN_1663381	TRAF3IP2	0.00258525	-1.06265
ILMN_1700679	LOC649661	0.039254	-1.06329
ILMN_1714952	ZNF703	0.027589	-1.06342
ILMN_1658176	ABCG1	0.0418898	-1.06425
ILMN_1673270	FLJ31132	0.00399496	-1.06432
ILMN_1696670	LOC92497	0.0103785	-1.0651
ILMN_1668983	ACVR2B	0.0213328	-1.06538
ILMN_1701169	HP1BP3	0.0323856	-1.06541
ILMN_1692947	LOC148137	0.0203049	-1.06557
ILMN_1705466	FLJ30058	0.0114187	-1.06592
ILMN_1733164	FBXO11	0.0132383	-1.06628
ILMN_1814820	LOC643109	0.032646	-1.06632
ILMN_1757697	NEIL3	0.0203229	-1.06679
ILMN_1713679	MREG	0.0220821	-1.06704
ILMN_1755321	AAAS	0.0185235	-1.06795
ILMN_1681154	ZBTB39	0.0429552	-1.06846
ILMN_1771397	SSX9	0.0247627	-1.06902
ILMN_1791423	LOC401052	0.0495709	-1.06928
ILMN_1657634	FANCD2	0.0375007	-1.06943
ILMN_1811397	CCDC78	0.0201696	-1.06979
ILMN_1712755	LRRC41	0.0285235	-1.07024
ILMN_1664682	DNA2	0.0492448	-1.07027
ILMN_1761044	GNB1L	0.0373014	-1.07089
ILMN_1764091	R3HDM2	0.0223529	-1.07127
ILMN_1673966	POLR3F	0.0476372	-1.07136
ILMN_1668752	FLJ20850	0.0417329	-1.07209
ILMN_1747271	ATP1B2	0.0495709	-1.07233
ILMN_1728225	KIAA1524	0.0067033	-1.07235
ILMN_1757230	ZNF250	0.0202429	-1.07287
ILMN_1679891	NAF1	0.0289231	-1.07326
ILMN_1776552	FUBP1	0.0341202	-1.07358
ILMN_1802190	FOXJ1	0.0436038	-1.07364
ILMN_1662184	C5orf34	0.0411256	-1.07368
ILMN_1867321		0.0498054	-1.07431
ILMN_1718813	CNKSR1	0.03429	-1.07493
ILMN_1660222	MTBP	0.0490321	-1.07502
ILMN_1801572	C19orf44	0.00226974	-1.07516
ILMN_1698252	FANCB	0.0250315	-1.07568
ILMN_1674698	AARS2	0.0417373	-1.0763
ILMN_1793033	RBM28	0.0311389	-1.07636
ILMN_1651850	RPS16	0.0131977	-1.07747
ILMN_1697118	ARMC6	0.0416253	-1.07751
ILMN_1724754	MPP3	0.0475885	-1.07796
ILMN_1671028	THRAP3	0.0194415	-1.07803
ILMN_1764503	C21orf124	0.0255242	-1.0782
ILMN_1721963	MEN1	0.0233226	-1.07857
ILMN_1883050		0.0392633	-1.07876
ILMN_1763436	SETX	0.0317159	-1.07894
ILMN_1753482	FAM86C	0.0265424	-1.07956
ILMN_1676036	LOC649679	0.0448221	-1.08003
ILMN_1722186	C2orf56	0.0185235	-1.08005
ILMN_1736747	MARK2	0.0273805	-1.08031
ILMN_1722292	AVL9	0.0370469	-1.08144
ILMN_1799198	OTUB2	0.00475312	-1.08202
ILMN_1788268	NAPG	0.017395	-1.08222
ILMN_1780188	B3GALNT2	0.00778286	-1.08254
ILMN_1781383	NFKBIL2	0.00967542	-1.08314
ILMN_1686835	C17orf41	0.0114187	-1.08339
ILMN_1671292	LOC390705	0.0452672	-1.08339
ILMN_1720833	C2orf48	0.0317406	-1.08352
ILMN_1703314	KLHL36	0.0145693	-1.08357
ILMN_1914933		0.040011	-1.08388
ILMN_1730825	SGOL1	0.00718058	-1.08459
ILMN_1678805	POMT2	0.0468551	-1.08492
ILMN_1724479	NR2C2	0.0132298	-1.08535
ILMN_1673376	TBCD	0.0374218	-1.08551
ILMN_1782403	PRR11	0.0313815	-1.08567
ILMN_1774083	TRIAP1	0.0487541	-1.08663
ILMN_1692390	CCNT1	0.0402565	-1.08679
ILMN_1746699	SGOL2	0.0204067	-1.08693
ILMN_1746375	CSNK2A1P	0.0219827	-1.08732
ILMN_1812503	PHKA1	0.00775291	-1.08738
ILMN_1756767	EIF5B	0.0331785	-1.08748
ILMN_1733930	PREB	0.0434103	-1.08771
ILMN_1737195	CENPK	0.02707	-1.08798
ILMN_1726064	PAK1IP1	0.0491914	-1.08847
ILMN_1813568	TRPV1	0.0405938	-1.08862
ILMN_1752394	CCNB1IP1	0.0407096	-1.08864
ILMN_1720093	PCP2	0.0383955	-1.08928
ILMN_1756402	TMEM177	0.0492219	-1.09004
ILMN_1789775	WDR74	0.0283107	-1.09009
ILMN_1814967	FLJ14082	0.022237	-1.0907
ILMN_1748432	ZNF525	0.0476372	-1.09087
ILMN_1891455		0.0478983	-1.09142
ILMN_1762678	NMT1	0.0232976	-1.09143
ILMN_1664511	NDC80	0.0139256	-1.09146
ILMN_1777156	GTPBP3	0.0131941	-1.09238
ILMN_1736995	C12orf66	0.024498	-1.09263
ILMN_1680378	RBM45	0.0313146	-1.09306
ILMN_1806999	B9D2	0.0317159	-1.09329
ILMN_1766902	LOC653904	0.0119058	-1.0936
ILMN_1669057	LOC642921	0.038145	-1.09386
ILMN_1736901	ZDHHC23	0.0112193	-1.0942
ILMN_1759277	OIP5	0.0120813	-1.09492
ILMN_1683279	PEX6	0.0273488	-1.09522
ILMN_1823803		0.0439254	-1.09536
ILMN_1802819	DEPDC1	0.00108168	-1.09556
ILMN_1671906	MND1	0.00416016	-1.09622
ILMN_1788387	UGCGL2	0.0458079	-1.09656
ILMN_1813344	C20orf7	0.0331785	-1.09693
ILMN_1689932	WDR85	0.0218349	-1.09711
ILMN_1799688	CDC23	0.0201696	-1.09722
ILMN_1806032	SLC25A16	0.0317159	-1.09735
ILMN_1686387	PYCRL	0.0367394	-1.09892
ILMN_1768293	NUP155	0.0487541	-1.10022
ILMN_1717403	C9orf100	0.00416016	-1.10034
ILMN_1775036	SEC22A	0.0215744	-1.10114
ILMN_1754655	TTLL5	0.0119387	-1.10144
ILMN_1791069	ZNF513	0.0109641	-1.10167
ILMN_1653822	NEK2	0.000646365	-1.10253
ILMN_1738027	BRCA1	0.010891	-1.10267
ILMN_1669842	CHAF1A	0.00152757	-1.10292
ILMN_1651341	LOC401010	0.00503622	-1.10301
ILMN_1717094	ZNF618	0.0318494	-1.10419
ILMN_1803773	MAG	0.0358804	-1.10443
ILMN_1765520	MTIF2	0.0485347	-1.10477
ILMN_1680967	CIP29	0.047129	-1.10511
ILMN_1812580	YDJC	0.0458425	-1.1052
ILMN_1809522	NACC2	0.0466603	-1.10559
ILMN_1673649	HYOU1	0.0466089	-1.10593
ILMN_1756676	PHF19	0.0103785	-1.10601
ILMN_1660079	RNF44	0.0466321	-1.10602
ILMN_1782829	GLTSCR1	0.026474	-1.10645
ILMN_1716546	FLJ23754	0.0138165	-1.10668
ILMN_1661596	FLVCR1	0.00763371	-1.10671
ILMN_1762095	TMTC4	0.0174088	-1.10685
ILMN_1683470	TMEM139	0.0439254	-1.10702
ILMN_1750711	MYO19	0.0310309	-1.10709
ILMN_1688246	LOC642852	0.0282853	-1.10742
ILMN_1679476	GART	0.027589	-1.10781
ILMN_1758750	EARS2	0.0299388	-1.10786
ILMN_1727761	GMEB1	0.033475	-1.10797
ILMN_1799150	PPM1J	0.0176318	-1.10811
ILMN_1718044	ELAC2	0.039696	-1.10815
ILMN_1718950	ZNF433	0.0159942	-1.10844
ILMN_1711166	WDR8	0.0496031	-1.10861
ILMN_1681927	HDGF2	0.0091529	-1.10877
ILMN_1722059	SAFB	0.024498	-1.10881
ILMN_1817255		0.0344791	-1.10913
ILMN_1673752	C1orf91	0.0185235	-1.1093
ILMN_1651936	SETD8	0.0439391	-1.10951
ILMN_1734096	DCLRE1A	0.0354119	-1.10982
ILMN_1727055	C12orf48	0.00948702	-1.11001
ILMN_1692575	SFRS8	0.0315975	-1.11032
ILMN_1786388	RNF113A	0.0270197	-1.1108
ILMN_1712291	MICALL2	0.0403592	-1.11109
ILMN_1678037	HIRIP3	0.0136822	-1.11155
ILMN_1790781	DHRS13	0.0201696	-1.11166
ILMN_1681812	HIF1AN	0.0190453	-1.11176
ILMN_1676555	TTC26	0.0263729	-1.11205
ILMN_1776088	NAT9	0.0205127	-1.11224
ILMN_1729611	REEP4	0.0314968	-1.11255
ILMN_1779381	SEC61A2	0.027589	-1.11259
ILMN_1832425		0.0393775	-1.1127
ILMN_1776577	DSCC1	0.0332974	-1.11315
ILMN_1815610	SYT12	0.0278755	-1.11335
ILMN_1763723	PTDSS2	0.0329431	-1.11337
ILMN_1736176	PLK1	0.00534868	-1.11373
ILMN_1677800	SGTA	0.0341202	-1.11378
ILMN_1734827	MKI67	0.00549078	-1.11387
ILMN_1748407	CCS	0.0139627	-1.11387
ILMN_1684571	RSPH1	0.0441824	-1.11397
ILMN_1729546	C19orf54	0.0326388	-1.11406
ILMN_1654212	DOK7	0.0449804	-1.11406
ILMN_1652434	MTHFD2L	0.0303729	-1.11443
ILMN_1747078	HYLS1	0.047505	-1.11478
ILMN_1753183	CDCA4	0.010891	-1.11497
ILMN_1732926	PVT1	0.0499064	-1.11508
ILMN_1690965	DHX9	0.0109641	-1.1151
ILMN_1686319	USP37	0.0118623	-1.1152
ILMN_1718354	INTS7	0.0119591	-1.11528
ILMN_1883298		0.0256318	-1.11586
ILMN_1807501	GINS4	0.0492219	-1.11586
ILMN_1748352	CTSL2	0.0306114	-1.11594
ILMN_1710315	NOS1AP	0.0186545	-1.11657
ILMN_1736816	C13orf3	0.00179505	-1.11666
ILMN_1712257	PPP2R3B	0.0452871	-1.11687
ILMN_1784540	KBTBD2	0.0288401	-1.11733
ILMN_1776993	COG2	0.0429552	-1.11755
ILMN_1677041	CHUK	0.0483175	-1.11758
ILMN_1736500	GNB2L1	0.0282853	-1.11802
ILMN_1765082	RBM10	0.00702106	-1.11813
ILMN_1664168	SLC25A11	0.0283132	-1.11823
ILMN_1800619	BRI3BP	0.0116664	-1.11824
ILMN_1653404	NKIRAS2	0.0317159	-1.11839
ILMN_1660844	INTS4	0.0412079	-1.11963
ILMN_1696556	KIAA0133	0.00587265	-1.12015
ILMN_1700728	KRTCAP3	0.0309531	-1.12025
ILMN_1736130	C18orf22	0.0116664	-1.12046
ILMN_1689528	ZNF136	0.0405155	-1.12056
ILMN_1750102	EME1	0.0118731	-1.1208
ILMN_1736234	C1orf77	0.0201696	-1.1209
ILMN_1740385	CEP164	0.0498054	-1.12134
ILMN_1751081	EHMT2	0.000945084	-1.12138
ILMN_1781721	DDX31	0.01393	-1.1215
ILMN_1784717	RPS19	0.0282853	-1.12159
ILMN_1657631	STAP2	0.0390062	-1.12235
ILMN_1666178	TP53I13	0.0403491	-1.12248
ILMN_1664167	RPF2	0.0207991	-1.12261
ILMN_1751743	XRCC1	0.0362476	-1.12305
ILMN_1713521	ZNF205	0.0270339	-1.1232
ILMN_1712386	C21orf45	0.0169167	-1.12338
ILMN_1784860	RFC3	0.0118612	-1.12378
ILMN_1807807	SKA2	0.0299214	-1.12402
ILMN_1744006	GFOD2	0.0492219	-1.12402
ILMN_1656540	RUVBL1	0.047129	-1.1244
ILMN_1673798	PPOX	0.0290945	-1.12452
ILMN_1724811	PARN	0.0487042	-1.1247
ILMN_1683786	FYTTD1	0.0354175	-1.12553
ILMN_1725787	RFX1	0.0459958	-1.12553
ILMN_1745329	PRR14	0.0364838	-1.12569
ILMN_1798083	CHERP	0.00389318	-1.12573
ILMN_1695491	WDYHV1	0.0370981	-1.12575
ILMN_1695357	CCDC99	0.0185235	-1.12611
ILMN_1794643	ZGPAT	0.0417317	-1.12633
ILMN_1656196	E2F6	0.010149	-1.12642
ILMN_1701243	C10orf2	0.0170612	-1.12731
ILMN_1655307	FAM136A	0.0239882	-1.12746
ILMN_1700811	UBFD1	0.0185478	-1.12748
ILMN_1724497	ABI2	0.0312963	-1.12754
ILMN_1670809	NRM	0.0157227	-1.1277
ILMN_1654289	ELK1	0.0137565	-1.128
ILMN_1693766	CEP135	0.0294753	-1.12834
ILMN_1813260	TIMM17B	0.0230917	-1.12915
ILMN_1689652	RNMTL1	0.00598264	-1.12978
ILMN_1665311	STH	0.0100785	-1.13024
ILMN_1692163	NSDHL	0.0461424	-1.13035
ILMN_1799819	MARS	0.0283784	-1.1305
ILMN_1651229	IPO13	0.0346095	-1.13057
ILMN_1796235	CIRH1A	0.0304347	-1.13063
ILMN_1710668	LETM1	0.0182175	-1.13085
ILMN_1721713	EXOSC9	0.00532526	-1.1309
ILMN_1667016	FAF1	0.0221256	-1.13095
ILMN_1719656	MRPL38	0.0311516	-1.1311
ILMN_1808792	ALKBH6	0.0331785	-1.13146
ILMN_1812856	ZSWIM1	0.0282757	-1.13157
ILMN_1729767	TARBP2	0.0192334	-1.13198
ILMN_1791820	ZNF768	0.0261994	-1.13203
ILMN_1652594	ACTR5	0.0254133	-1.13237
ILMN_1692896	JMJD4	0.0474182	-1.13281
ILMN_1815303	LOC642197	0.0255135	-1.13283
ILMN_1725441	NFATC2IP	0.0169131	-1.1333
ILMN_1655642	FANCI	0.00239168	-1.13346
ILMN_1673753	LOC642033	0.0265644	-1.13366
ILMN_1814281	SPC25	0.00690448	-1.13432
ILMN_1658821	SAMD1	0.0331785	-1.13475
ILMN_1802627	PSMG3	0.00357935	-1.13519
ILMN_1756793	POLS	0.0202209	-1.13521
ILMN_1660582	LIG3	0.0180204	-1.13554
ILMN_1710571	PAPD5	0.0379844	-1.13556
ILMN_1674302	PPAT	0.0478983	-1.13585
ILMN_1700549	ERLIN2	0.0495438	-1.13603
ILMN_1654112	PARD6A	0.015878	-1.13611
ILMN_1730999	TPR	0.0418898	-1.13631
ILMN_1678423	SPA17	0.0381876	-1.13646
ILMN_1742166	GRWD1	0.0132509	-1.1368
ILMN_1678998	LRRC14	0.0417033	-1.13717
ILMN_1706246	CCT5	0.0475833	-1.13718
ILMN_1672042	DOLPP1	0.0407096	-1.13723
ILMN_1813840	AOF2	0.026032	-1.1373
ILMN_1807981	SIGIRR	0.0356403	-1.13744
ILMN_1799860	PIGM	0.0494122	-1.13762
ILMN_1704500	STAP2	0.0145603	-1.13769
ILMN_1689097	NAT5	0.0321943	-1.13783
ILMN_1682368	LRWD1	0.0176318	-1.13797
ILMN_1690653	CDK2AP2	0.0407096	-1.13798
ILMN_1709484	BLM	0.00556344	-1.13869
ILMN_1660775	LOC650152	0.0169131	-1.13913
ILMN_1659953	2003-09-01	0.0198996	-1.13916
ILMN_1743663	POMT1	0.0328422	-1.13941
ILMN_1798210	E2F7	0.0103785	-1.1401
ILMN_1756049	NT5DC3	0.0116664	-1.14012
ILMN_1655694	LOC642031	0.0378801	-1.14014
ILMN_1688534	EIF2B5	0.0338497	-1.14067
ILMN_1732885	BTBD12	0.0116664	-1.14068
ILMN_1702933	ADM2	0.0207991	-1.14072
ILMN_1774336	POLE2	0.0478983	-1.14095
ILMN_1687107	RFWD3	0.0191185	-1.14103
ILMN_1754489	FBXL20	0.00825987	-1.14116
ILMN_1758629	DONSON	0.00838875	-1.14139
ILMN_1715994	HGS	0.031679	-1.14144
ILMN_1665428	GSDMD	0.0441266	-1.14152
ILMN_1772113	U2AF1	0.0130343	-1.14156
ILMN_1750100	TUBB4Q	0.0091529	-1.14158
ILMN_1722900	EIF4A1	0.0308457	-1.14171
ILMN_1741350	CEP70	0.0029045	-1.14187
ILMN_1707534	NKRF	0.0242711	-1.1423
ILMN_1751425	ERMP1	0.0489425	-1.14337
ILMN_1714710	CCDC120	0.0460817	-1.14341
ILMN_1768020	HAUS8	0.00259442	-1.14343
ILMN_1793712	SCAMP3	0.0255242	-1.14355
ILMN_1728355	PSMD4	0.024496	-1.14363
ILMN_1702519	LOC643466	0.0354514	-1.14392
ILMN_1757317	LARS	0.0282365	-1.14395
ILMN_1658885	DAGLB	0.0202209	-1.14412
ILMN_1789944	PGAM5	0.0119387	-1.14472
ILMN_1746393	TSEN2	0.0272827	-1.14508
ILMN_1685490	TEX14	0.0290945	-1.14546
ILMN_1727540	C1orf112	0.0139957	-1.14564
ILMN_1760280	NXT1	0.0213756	-1.14571
ILMN_1712636	NVL	0.0314324	-1.14571
ILMN_1652580	POLD1	0.0159942	-1.14597
ILMN_1658437	SFXN4	0.0113062	-1.14614
ILMN_1671557	PHLDA2	0.0290945	-1.14615
ILMN_1677765	LRP8	0.0349788	-1.14648
ILMN_1754051	RMI1	0.0161081	-1.14665
ILMN_1769508	PIGX	0.0172342	-1.14672
ILMN_1711005	CDC25A	0.0411752	-1.14699
ILMN_1700461	AARSD1	0.0332246	-1.14741
ILMN_1722774	VPS72	0.0095872	-1.14788
ILMN_1796430	PSMD3	0.027589	-1.14872
ILMN_1678300	MGC40489	0.0328671	-1.14874
ILMN_1744240	WDR67	0.0213328	-1.14923
ILMN_1666739	RBM15	0.0389001	-1.14933
ILMN_1693985	JPH1	0.0472992	-1.1494
ILMN_1655684	SARS2	0.0119058	-1.14953
ILMN_1675577	TRMT61A	0.0312563	-1.14997
ILMN_1811063	LOC649447	0.0481266	-1.15061
ILMN_1806818	MCM3	0.0331785	-1.15066
ILMN_1799289	MRPL55	0.0341202	-1.15069
ILMN_1801421	EMD	0.0199123	-1.15078
ILMN_1664630	CHEK1	0.00141128	-1.15097
ILMN_1795876	GPS1	0.0237101	-1.15106
ILMN_1746257	DAZAP1	0.0131977	-1.15133
ILMN_1720531	JMJD2B	0.0420808	-1.15182
ILMN_1810474	UBE2I	0.0263056	-1.1525
ILMN_1751072	SRPRB	0.027589	-1.15264
ILMN_1761722	ZNF579	0.0390062	-1.15276
ILMN_1778255	FARSA	0.0138498	-1.15296
ILMN_1667432	HYAL3	0.00462118	-1.15324
ILMN_1660654	CDCA2	0.000970172	-1.1533
ILMN_1715661	TFAM	0.0238779	-1.15332
ILMN_1662741	EDG4	0.0345831	-1.1536
ILMN_1788810	C12orf30	0.0126221	-1.15369
ILMN_1802843	PRCC	0.00239168	-1.15398
ILMN_1787324	C16orf48	0.027589	-1.15411
ILMN_1681221	C9orf100	0.00122728	-1.15427
ILMN_1748034	KLHDC4	0.00189213	-1.1545
ILMN_1651872	UBIAD1	0.00736075	-1.15483
ILMN_1674662	C15orf42	0.00133641	-1.15499
ILMN_1774589	IQCC	0.0037066	-1.15512
ILMN_1653861	SCMH1	0.024059	-1.15571
ILMN_1722397	LOC729137	0.0461424	-1.15592
ILMN_1755354	YBX2	0.0229535	-1.15626
ILMN_1694126	KIF24	0.00407884	-1.15641
ILMN_1670472	FAF2	0.0311516	-1.15651
ILMN_1815169	MCM5	0.0289277	-1.15714
ILMN_1733256	PSMD8	0.039696	-1.15741
ILMN_1713088	MSI2	0.0136164	-1.15752
ILMN_1763907	C6orf173	0.0445147	-1.15761
ILMN_1743770	SLC25A14	0.00666735	-1.15785
ILMN_1766797	CCS	0.00640014	-1.15916
ILMN_1765532	RDBP	0.0104558	-1.15932
ILMN_1739441	GANAB	0.0413387	-1.15933
ILMN_1697735	EWSR1	0.00583232	-1.15936
ILMN_1766346	ZNF512B	0.0199649	-1.1606
ILMN_1687303	ACAD10	0.0129592	-1.16075
ILMN_1759495	XPO5	0.0133359	-1.1608
ILMN_1675483	ANKMY1	0.0262528	-1.16097
ILMN_1779376	GSK3B	0.040712	-1.16166
ILMN_1693669	WDR79	0.00867851	-1.16179
ILMN_1804248	FDPS	0.015878	-1.16209
ILMN_1711543	C14orf169	0.0209076	-1.16214
ILMN_1690695	PEX11A	0.0341202	-1.16218
ILMN_1772713	BMS1	0.0133528	-1.16278
ILMN_1760201	DNMT1	0.0493166	-1.163
ILMN_1768930	U2AF2	0.0264365	-1.16368
ILMN_1798804	SRPK1	0.0091529	-1.1638
ILMN_1699570	TPD52L2	0.0151502	-1.16384
ILMN_1785252	SLC26A6	0.0180776	-1.164
ILMN_1768751	MTA3	0.0499064	-1.16416
ILMN_1659725	EXOSC5	0.0309254	-1.16438
ILMN_1805778	RBM12B	0.0204014	-1.16468
ILMN_1721167	MYT1	0.0317159	-1.1652
ILMN_1669928	ARHGEF16	0.048821	-1.16534
ILMN_1685002	RCE1	0.0270698	-1.16542
ILMN_1696266	XRCC3	0.00197838	-1.16544
ILMN_1677452	REXO4	0.0311389	-1.16573
ILMN_1691111	SPATA2L	0.00867851	-1.16597
ILMN_1800390	ZNF511	0.00757866	-1.16621
ILMN_1683562	SNRPG	0.0311608	-1.16658
ILMN_1777811	URG4	0.00438223	-1.16682
ILMN_1781942	HMMR	0.0131136	-1.16683
ILMN_1667670	SLC25A15	0.00480574	-1.16694
ILMN_1771224	SKA1	0.00755078	-1.16694
ILMN_1754272	GINS3	0.00451791	-1.16716
ILMN_1790350	TPRG1	0.0311608	-1.16812
ILMN_1667222	MTX1	0.01774	-1.16838
ILMN_1791388	ZNF787	0.0465662	-1.16856
ILMN_1749829	DLGAP5	0.00913023	-1.16858
ILMN_1732150	KIAA0101	0.0029045	-1.16891
ILMN_1721977	ARD1A	0.0264365	-1.16925
ILMN_1742145	ESPL1	0.0169191	-1.16976
ILMN_1697363	C20orf27	0.0133994	-1.17026
ILMN_1811102	LRSAM1	0.00256501	-1.17036
ILMN_1662130	LOC730316	0.0411256	-1.17037
ILMN_1657395	HMGCR	0.0265424	-1.17057
ILMN_1700888	ENPP1	0.00709813	-1.17079
ILMN_1793672	SIX5	0.0360544	-1.17112
ILMN_1702806	PDCL3	0.0174899	-1.17139
ILMN_1737847	RMND5B	0.00926499	-1.17149
ILMN_1751086	ATL3	0.0137998	-1.17152
ILMN_1714438	MUTYH	0.0122484	-1.1716
ILMN_1753498	COASY	0.0341223	-1.17184
ILMN_1702763	ZMYM1	0.00570923	-1.1723
ILMN_1708105	EZH2	0.0114187	-1.17239
ILMN_1740430	SLC2A4RG	0.0205085	-1.17239
ILMN_1790100	C11orf82	0.00834207	-1.17252
ILMN_1762275	CSE1L	0.0351549	-1.17273
ILMN_1786347	TNPO1	0.022237	-1.1729
ILMN_1694233	ACYP1	0.0216616	-1.17305
ILMN_1732171	LOC652685	0.0230121	-1.17327
ILMN_1759232	IRS1	0.044761	-1.1734
ILMN_1655154	PTBP1	0.0406197	-1.17341
ILMN_1712628	GTF2IRD1	0.0132383	-1.1737
ILMN_1699737	TRAP1	0.0282853	-1.1743
ILMN_1711227	GMDS	0.024496	-1.17457
ILMN_1709439	CHMP1A	0.0354514	-1.17465
ILMN_1768506	MAPK15	0.0251404	-1.17483
ILMN_1678409	ABCC13	0.0285061	-1.17488
ILMN_1692760	DPAGT1	0.0131977	-1.17492
ILMN_1670542	AK2	0.0295184	-1.17517
ILMN_1703284	SPIRE2	0.0172901	-1.17535
ILMN_1771264	ELL3	0.0265915	-1.17565
ILMN_1709044	TGIF2	0.00905132	-1.17577
ILMN_1677509	PRR7	0.0416718	-1.17627
ILMN_1803997	SDCCAG3	0.0223867	-1.17651
ILMN_1697189	PNCK	0.041224	-1.17666
ILMN_1711886	ALG3	0.0448453	-1.17675
ILMN_1787256	HCN3	0.0076804	-1.17701
ILMN_1726306	HMBS	0.0489772	-1.17714
ILMN_1811480	ADPRHL2	0.00124997	-1.17717
ILMN_1728684	PELP1	0.0331785	-1.17724
ILMN_1718619	TRIM11	0.00725905	-1.17747
ILMN_1742577	GTPBP4	0.0119591	-1.1781
ILMN_1810423	RPP40	0.00549078	-1.17817
ILMN_1812489	CCDC21	0.00141128	-1.17825
ILMN_1866954		0.00720536	-1.17931
ILMN_1679438	MLF1IP	0.00532526	-1.17933
ILMN_1797813	SUZ12	0.0165094	-1.17974
ILMN_1750052	NOP14	0.0186143	-1.17976
ILMN_1803691	ARTN	0.0211753	-1.18013
ILMN_1677968	KIAA0649	0.0259358	-1.18073
ILMN_1732772	PPME1	0.03429	-1.18114
ILMN_1751016	LONRF2	0.0317319	-1.18139
ILMN_1715905	DSN1	0.00414167	-1.18175
ILMN_1720708	CSNK1D	0.0132509	-1.18177
ILMN_1668814	CENPM	0.00330332	-1.18204
ILMN_1669094	ZNF672	0.0392633	-1.18261
ILMN_1751330	RBCK1	0.00913023	-1.18268
ILMN_1742731	SLC35A2	0.0191287	-1.18298
ILMN_1673073	WDR62	0.00470727	-1.18311
ILMN_1693645	LOC554208	0.018359	-1.1832
ILMN_1774890	LAS1L	0.00640014	-1.18357
ILMN_1695386	RAD51C	0.046307	-1.18358
ILMN_1815924	NUP107	0.00515244	-1.18398
ILMN_1748819	MRPL22	0.0107289	-1.18427
ILMN_1762312	FOXRED1	0.0153036	-1.18463
ILMN_1747451	PLCXD1	0.0350365	-1.1853
ILMN_1761138	C9orf142	0.0317159	-1.18614
ILMN_1775677	TYSND1	0.0270789	-1.18615
ILMN_1804652	PLEKHH3	0.034782	-1.18616
ILMN_1722066	ARMC1	0.0311516	-1.18622
ILMN_1656904	SLC1A4	0.018095	-1.18668
ILMN_1732688	DUT	0.00988601	-1.18676
ILMN_1692511	TMEM106C	0.0492211	-1.18714
ILMN_1665095	NELF	0.0473235	-1.18729
ILMN_1738263	PIGU	0.00735246	-1.18751
ILMN_1678678	SLC37A4	0.0223161	-1.18794
ILMN_1785336	PMM2	0.0242502	-1.18831
ILMN_1725183	TBCE	0.00449602	-1.18833
ILMN_1689007	SFRS14	0.0119387	-1.1886
ILMN_1811014	PGR	0.0378327	-1.18909
ILMN_1660942	LOC653352	0.0254133	-1.18931
ILMN_1813938	CHCHD4	0.00643918	-1.18981
ILMN_1659727	CDAN1	0.024059	-1.19008
ILMN_1714623	TOMM22	0.00640014	-1.19021
ILMN_1771039	GTSE1	0.00226974	-1.19022
ILMN_1711270	SFRS14	0.0360544	-1.19163
ILMN_1708906	C2orf29	0.0201696	-1.192
ILMN_1779353	PUS7	0.00778286	-1.19212
ILMN_1797903	ZNF544	0.0348352	-1.19227
ILMN_1783285	CTPS	0.0116664	-1.19237
ILMN_1697777	TSTA3	0.0212609	-1.19239
ILMN_1657701	TMEM137	0.0293722	-1.19244
ILMN_1785179	UBE2G2	0.027589	-1.19253
ILMN_1677305	PVR	0.00814558	-1.19278
ILMN_1820244		0.00152757	-1.19314
ILMN_1685413	ALG8	0.0186143	-1.19314
ILMN_1786843	KCTD13	0.0109641	-1.19338
ILMN_1746673	2003-09-01	0.0147539	-1.19353
ILMN_1790202	C1orf35	0.0219698	-1.19404
ILMN_1746686	POLR1C	0.0230958	-1.19415
ILMN_1681591	PTPN1	0.0382143	-1.19418
ILMN_1658802	KRTCAP2	0.0466647	-1.1953
ILMN_1748476	NOP58	0.0347056	-1.19554
ILMN_1651378	AUP1	0.00157494	-1.19578
ILMN_1810228	TTF2	0.00416016	-1.19584
ILMN_1712517	ZNF696	0.0129592	-1.19614
ILMN_1772207	LOC653377	0.0166615	-1.19694
ILMN_1688464	MAP6D1	0.0247784	-1.19698
ILMN_1681016	SPNS1	0.0116664	-1.19744
ILMN_1774596	BSCL2	0.0488137	-1.1978
ILMN_1659058	PPP1R10	0.00939939	-1.19818
ILMN_1758392	ANKS1B	0.0287352	-1.1982
ILMN_1658027	RAD54L	0.000523187	-1.19864
ILMN_1691487	TRAF2	0.0146495	-1.19889
ILMN_1795976	SFXN2	0.0269218	-1.19901
ILMN_1866216		0.0185235	-1.1991
ILMN_1760143	ADRM1	0.0119387	-1.19924
ILMN_1802905	PIAS4	0.0232688	-1.19942
ILMN_1738347	RNPEP	0.00633442	-1.19948
ILMN_1724609	SLC2A8	0.0311608	-1.19975
ILMN_1812940	TRMT1	0.00814558	-1.19982
ILMN_1779404	PUF60	0.024572	-1.19984
ILMN_1729051	MSH6	0.0118623	-1.19992
ILMN_1691717	RHBDF2	0.0255242	-1.20051
ILMN_1680193	PAXIP1	0.0229142	-1.2006
ILMN_1787280	C1orf135	0.00156355	-1.20096
ILMN_1749834	LOC388588	0.0237754	-1.20177
ILMN_1661809	PRRG4	0.0119058	-1.20186
ILMN_1720287	E4F1	0.0412457	-1.20214
ILMN_1758674	TMEM93	0.00640974	-1.20237
ILMN_1689800	MRTO4	0.016784	-1.20238
ILMN_1739645	ANLN	0.00120942	-1.20252
ILMN_1700831	SLC27A2	0.0342088	-1.20252
ILMN_1755405	FRAG1	0.0132029	-1.2027
ILMN_1784655	TLCD1	0.010891	-1.20327
ILMN_1674231	CHAF1B	0.00860201	-1.20354
ILMN_1811373	FAM20B	0.0137465	-1.20377
ILMN_1766185	AXIN1	0.0131136	-1.20383
ILMN_1697567	TPM3	0.0311516	-1.20516
ILMN_1661778	MTL5	0.0137516	-1.20574
ILMN_1811472	KIF23	0.00131484	-1.20581
ILMN_1751571	RAD23A	0.00433075	-1.20612
ILMN_1726565	PIK3R2	0.0119387	-1.20627
ILMN_1762549	ORAOV1	0.0183844	-1.20667
ILMN_1722648	SF3B4	0.00794651	-1.20681
ILMN_1656628	WDR4	0.00360633	-1.20872
ILMN_1774990	C16orf13	0.00867851	-1.2088
ILMN_1747119	FBXO46	0.0197874	-1.20953
ILMN_1694530	DDA1	0.00778286	-1.2099
ILMN_1777528	NCBP1	0.00209876	-1.21032
ILMN_1739374	NKAIN1	0.0341202	-1.21163
ILMN_1797425	DDX55	0.0151445	-1.21184
ILMN_1651405	BRD9	0.0127118	-1.21187
ILMN_1815190	METTL1	0.00720188	-1.21234
ILMN_1779399	SNRPA	0.0119387	-1.21245
ILMN_1690371	MRPL11	0.00779425	-1.21273
ILMN_1752953	BCL2L12	0.0157227	-1.2129
ILMN_1782247	KAT2A	0.020452	-1.21308
ILMN_1683441	NCAPD3	0.000970172	-1.21311
ILMN_1712803	CCNB1	0.00197838	-1.21359
ILMN_1696615	CA8	0.0299388	-1.21365
ILMN_1792168	GALE	0.0185235	-1.21418
ILMN_1747506	DHX34	0.00145151	-1.21428
ILMN_1768662	UCK2	0.00475222	-1.21536
ILMN_1662328	CNNM3	0.0118623	-1.21536
ILMN_1782331	TDG	0.0370469	-1.21553
ILMN_1750661	FBXW9	0.00108168	-1.21605
ILMN_1665384	SH3BP5L	0.0091529	-1.21633
ILMN_1661490	PFDN6	0.0175076	-1.21653
ILMN_1653896	ATRIP	0.00534868	-1.21666
ILMN_1720124	RCC2	0.0191287	-1.21683
ILMN_1808071	KIF14	0.00130002	-1.21711
ILMN_1715616	PPIL5	0.00534868	-1.2173
ILMN_1728887	PAK4	0.0119387	-1.21804
ILMN_1782897	CAPRIN1	0.0282757	-1.21808
ILMN_1767253	RRP12	0.00720536	-1.21817
ILMN_1682792	BYSL	0.00320313	-1.21841
ILMN_1671486	HOMER2	0.0178304	-1.21859
ILMN_1684690	HDAC11	0.0118623	-1.21936
ILMN_1708369	EPS15L1	0.0043138	-1.2198
ILMN_1794132	NDUFS8	0.0273805	-1.21986
ILMN_1676191	DARS2	0.00197838	-1.22105
ILMN_1696469	LOC648509	0.0207287	-1.22135
ILMN_1801869	WDR75	0.0114187	-1.22149
ILMN_1678904	ENO3	0.0273488	-1.2217
ILMN_1727996	BAG4	0.0157227	-1.22214
ILMN_1746579	UBE2O	0.0377374	-1.22242
ILMN_1811823	MED25	0.0162688	-1.22294
ILMN_1783798	GAS8	0.0333164	-1.22324
ILMN_1768127	EBNA1BP2	0.00532323	-1.22488
ILMN_1694177	PCNA	0.0434153	-1.22518
ILMN_1804851	MRPS17	0.00433075	-1.22562
ILMN_1797693	BRI3BP	0.00488005	-1.22575
ILMN_1704055	HSPC111	0.00433075	-1.22591
ILMN_1753243	DNAJB11	0.0118623	-1.22595
ILMN_1775744	MRPS16	0.00248739	-1.2261
ILMN_1777342	PREX1	0.0118623	-1.22639
ILMN_1804498	C7orf27	0.00230077	-1.22662
ILMN_1659364	RFC5	0.0186545	-1.22767
ILMN_1698733	CNIH2	0.0107289	-1.22796
ILMN_1796210	PPRC1	0.0114759	-1.22937
ILMN_1651828	CCT3	0.00811954	-1.23077
ILMN_1737157	GRAMD1A	0.0169167	-1.23094
ILMN_1726659	THOP1	0.0255135	-1.23139
ILMN_1748770	CKAP5	0.00778286	-1.2316
ILMN_1803110	SF3B3	0.00624102	-1.2321
ILMN_1739805	NDE1	0.0185235	-1.23233
ILMN_1728972	FAM64A	0.00356131	-1.23247
ILMN_1704750	LOC647000	0.00462118	-1.23316
ILMN_1680692	NUCKS1	0.0317406	-1.23334
ILMN_1672728	KCTD5	0.018311	-1.23351
ILMN_1796417	ASNS	0.0269823	-1.23353
ILMN_1781479	SUV39H1	0.00112102	-1.23391
ILMN_1723158	NOP2	0.0144335	-1.23397
ILMN_1685079	TELO2	0.0272558	-1.23432
ILMN_1701413	PIGQ	0.0326388	-1.23461
ILMN_1724489	RFC4	0.00320313	-1.23475
ILMN_1734312	GCN1L1	0.0115924	-1.23484
ILMN_1808789	MYO5C	0.039696	-1.23485
ILMN_1804735	CBS	0.0391538	-1.23492
ILMN_1738530	ATAD3A	0.00709806	-1.23586
ILMN_1755677	FAM158A	0.00108168	-1.23598
ILMN_1686871	PARP1	0.00355518	-1.23667
ILMN_1716400	FOXM1	0.000646365	-1.2371
ILMN_1809477	CARHSP1	0.0186545	-1.23813
ILMN_1774844	MAPKAPK2	0.00572255	-1.23846
ILMN_1665538	SKP2	0.00189213	-1.2385
ILMN_1715625	C20orf94	0.0118612	-1.23924
ILMN_1757497	VGF	0.0390614	-1.23961
ILMN_1776147	C21orf59	0.0244045	-1.23986
ILMN_1725260	CDC25C	0.00050549	-1.23987
ILMN_1709124	ANO8	0.00488005	-1.24048
ILMN_1809866	WDR74	0.0114187	-1.24051
ILMN_1700604	RBM14	0.0118623	-1.24171
ILMN_1783337	DECR2	0.00587489	-1.24226
ILMN_1767658	RRS1	0.0272212	-1.2423
ILMN_1665797	CSE1L	0.0226201	-1.24455
ILMN_1777096	TDG	0.010891	-1.24493
ILMN_1801313	SIAH2	0.0204398	-1.24571
ILMN_1707493	SNHG3-RCC1	0.00416016	-1.24598
ILMN_1789123	PLK4	0.00391536	-1.24633
ILMN_1683082	RPUSD1	0.010144	-1.24662
ILMN_1815666	ATP2A2	0.0133924	-1.24737
ILMN_1762883	ECE2	0.00534868	-1.24808
ILMN_1654653	KLC1	0.0091529	-1.24961
ILMN_1688971	NOL11	0.0178304	-1.24974
ILMN_1775008	NCAPD2	0.00702106	-1.24977
ILMN_1662334	DNAJA3	0.00438223	-1.25061
ILMN_1799667	KIF4A	0.00215036	-1.25128
ILMN_1663954	TH1L	0.017225	-1.25156
ILMN_1809010	PSMC3	0.00239168	-1.25166
ILMN_1781943	FAM83D	0.0029045	-1.25217
ILMN_1748894	GTPBP3	0.00389318	-1.25233
ILMN_1791826	RAB25	0.0379288	-1.25298
ILMN_1689445	POLR2H	0.00590065	-1.25311
ILMN_1680129	NSUN2	0.00570923	-1.25349
ILMN_1710676	FBXO5	0.0114187	-1.25355
ILMN_1815086	NINJ1	0.0155947	-1.2537
ILMN_1705301	TEAD4	0.00825987	-1.25398
ILMN_1797933	MRPL17	0.00646799	-1.25501
ILMN_1704164	ATP13A2	0.00778286	-1.25662
ILMN_1653466	HES4	0.0491203	-1.25686
ILMN_1701331	UBE2M	0.0112071	-1.25691
ILMN_1898124		0.0107289	-1.25728
ILMN_1653553	C14orf80	0.00443449	-1.25844
ILMN_1777564	MAD2L1	0.0185735	-1.25866
ILMN_1651262	HNRNPAB	0.0231961	-1.25901
ILMN_1705594	NAT10	0.00926499	-1.25998
ILMN_1754912	GLE1	0.00640014	-1.26024
ILMN_1800261	TUBA1B	0.00050549	-1.26059
ILMN_1708328	RAB11FIP3	0.0044962	-1.26163
ILMN_1697348	WBSCR22	0.00658	-1.26172
ILMN_1711078	CDC2L2	0.0195791	-1.26287
ILMN_1677484	SNAPC4	0.0285048	-1.26328
ILMN_1740265	ACOT7	0.0170122	-1.26385
ILMN_1708414	GNL3L	0.0102826	-1.26413
ILMN_1663667	FLAD1	0.00838875	-1.26466
ILMN_1773751	HRAS	0.00438223	-1.2647
ILMN_1718771	CCDC24	0.0311514	-1.26539
ILMN_1720526	CENPN	0.00790426	-1.26583
ILMN_1806502	ZNF165	0.0159942	-1.26592
ILMN_1814589	LOC728037	0.00407884	-1.26741
ILMN_1706238	CSE1L	0.0202309	-1.26861
ILMN_1690252	ALKBH2	0.00112102	-1.26963
ILMN_1662658	PUS1	0.00282997	-1.26972
ILMN_1790136	C20orf20	0.0132029	-1.26988
ILMN_1671843	PSRC1	0.000520364	-1.27017
ILMN_1745282	RAGE	0.00860201	-1.27036
ILMN_1666305	CDKN3	0.0132012	-1.27116
ILMN_1761113	GNL2	0.00860201	-1.2743
ILMN_1673936	KHSRP	0.0119387	-1.27441
ILMN_1732537	HEATR2	0.013424	-1.27511
ILMN_1769634	STRA13	0.0208585	-1.27523
ILMN_1757627	ZMYND19	0.018095	-1.2756
ILMN_1783287	S100A14	0.0159694	-1.27571
ILMN_1810922	PCNT	0.0136822	-1.27611
ILMN_1807767	KIAA0182	0.0109641	-1.27629
ILMN_1658289	WDR54	0.0306768	-1.27696
ILMN_1659343	BOLA2	0.013713	-1.27737
ILMN_1794539	KIF11	0.00341673	-1.27776
ILMN_1764082	MBOAT1	0.00532526	-1.27922
ILMN_1655498	FLJ25404	0.00357935	-1.28012
ILMN_1746206	AZI1	0.00120942	-1.28027
ILMN_1686135	CCDC45	0.0304659	-1.28315
ILMN_1724407	TACC3	0.000784851	-1.28446
ILMN_1689378	CCRN4L	0.0468551	-1.28474
ILMN_1654545	CPSF1	0.00736937	-1.2852
ILMN_1662198	RANGAP1	0.0162865	-1.2864
ILMN_1671933	CLCC1	0.00681137	-1.28648
ILMN_1718629	NRIP1	0.0477035	-1.28657
ILMN_1656501	DUSP5	0.0461244	-1.28769
ILMN_1711904	MXD3	0.0029045	-1.28838
ILMN_1716279	CENPE	0.00141977	-1.28855
ILMN_1671257	DKC1	0.00276069	-1.28994
ILMN_1696713	POLA2	0.000971388	-1.2901
ILMN_1737184	CDCA7	0.0195791	-1.29059
ILMN_1724424	PRRT2	0.0131136	-1.2916
ILMN_1738207	CISH	0.0109641	-1.29164
ILMN_1661264	SHMT2	0.00571916	-1.29239
ILMN_1799516	DNAJC9	0.00230077	-1.2926
ILMN_1702171	LPCAT1	0.0259358	-1.29262
ILMN_1665559	CDK2	0.00112102	-1.29331
ILMN_1693145	BUB3	0.00218478	-1.29402
ILMN_1801257	CENPA	0.00355518	-1.29412
ILMN_1742379	IFT122	0.010144	-1.29433
ILMN_1799389	FBXL6	0.00409297	-1.29447
ILMN_1750130	GSPT1	0.00417985	-1.29465
ILMN_1795341	SFRS1	0.0109641	-1.29469
ILMN_1710954	LOC283932	0.0117637	-1.29551
ILMN_1712452	KIF20B	0.00061228	-1.29691
ILMN_1706779	LIG1	0.0110699	-1.29781
ILMN_1814173	SMARCA4	0.00532526	-1.29845
ILMN_1695719	EIF2C2	0.0359804	-1.29939
ILMN_1680507	PPP2R2C	0.0328375	-1.29947
ILMN_1696601	VARS	0.00290919	-1.2998
ILMN_1910550		0.0194497	-1.30036
ILMN_1693836	LOC653344	0.0448221	-1.30377
ILMN_1761762	C6orf141	0.0132509	-1.3039
ILMN_1804090	SLC25A10	0.00549078	-1.30431
ILMN_1769517	PRKDC	0.000970172	-1.30512
ILMN_1709132	ELP2	0.0303069	-1.30626
ILMN_1672080	NR2F6	0.0172267	-1.30708
ILMN_1764239	PMPCA	0.00802482	-1.30775
ILMN_1766637	GLA	0.0436038	-1.30836
ILMN_1685709	TMEM125	0.0161081	-1.30945
ILMN_1737728	CDCA3	0.00524381	-1.30963
ILMN_1703441	ZNF593	0.00341673	-1.3111
ILMN_1722218	MBOAT7	0.0169131	-1.31219
ILMN_1656452	C16orf59	0.000520364	-1.31226
ILMN_1683120	UNG	0.00438223	-1.31266
ILMN_1803018	KIFC2	0.0213328	-1.31462
ILMN_1654151	COX6C	0.00286435	-1.31714
ILMN_1766171	SNF8	0.0091529	-1.3184
ILMN_1763704	RGS11	0.0460791	-1.31871
ILMN_1678781	SNX26	0.00976591	-1.31964
ILMN_1757882	PPP1R16A	0.00245288	-1.32003
ILMN_1757631	DBNDD1	0.00330332	-1.32018
ILMN_1790537	C16orf75	0.000520364	-1.3205
ILMN_1707720	SLC1A5	0.00403563	-1.32192
ILMN_1747303	DDX39	0.00112102	-1.32219
ILMN_1802252	GAPDH	0.0172267	-1.32281
ILMN_1783728	TBRG4	0.0170023	-1.32365
ILMN_1767523	IL17RB	0.0119387	-1.32402
ILMN_1679405	DDX56	0.0171752	-1.32452
ILMN_1771593	RRM1	0.00050549	-1.32499
ILMN_1671766	F12	0.0135245	-1.32608
ILMN_1731237	CLSTN2	0.0139957	-1.32637
ILMN_1736939	UGCG	0.0434153	-1.32974
ILMN_1756326	CKS2	0.0137499	-1.3299
ILMN_1772074	C19orf51	0.00245288	-1.33043
ILMN_1747911	CDC2	0.00163175	-1.33264
ILMN_1659206	RARA	0.027589	-1.33462
ILMN_1900110		0.00753926	-1.33464
ILMN_1796923	LOC81691	0.000393967	-1.33473
ILMN_1748827	LOC388564	0.0135308	-1.33553
ILMN_1810901	RNASEH2A	0.00130002	-1.33602
ILMN_1790625	CBX3	0.0119387	-1.33636
ILMN_1731184	MELK	0.00371827	-1.33697
ILMN_1784436	KIAA1688	0.0273805	-1.33803
ILMN_1780769	TUBB2C	0.0311516	-1.33859
ILMN_1708416	ARL6IP1	0.00727855	-1.33955
ILMN_1723042	CLDN3	0.0412079	-1.33968
ILMN_1693410	BRI3BP	0.00838875	-1.34078
ILMN_1786125	CCNA2	0.00189213	-1.34096
ILMN_1684045	CDCA4	0.00184685	-1.341
ILMN_1801697	C19orf46	0.0259914	-1.34199
ILMN_1728984	PA2G4	0.00523781	-1.34244
ILMN_1659610	TJP3	0.0186476	-1.34286
ILMN_1676026	MRPS26	0.0256867	-1.34384
ILMN_1721170	GREB1	0.00261742	-1.34404
ILMN_1683859	SLC7A1	0.00480574	-1.34446
ILMN_1741406	HOOK1	0.0457371	-1.34497
ILMN_1788099	LSM4	0.00858174	-1.3451
ILMN_1776674	SAC3D1	0.0045941	-1.3461
ILMN_1774661	SNRPB	0.00341673	-1.3462
ILMN_1691949	LOC728554	0.000579406	-1.34887
ILMN_1662470	C10orf35	0.00640014	-1.34996
ILMN_1707858	H2AFZ	0.0215744	-1.35055
ILMN_1748578	RAD21	0.0318566	-1.35228
ILMN_1674236	HSPB1	0.0103785	-1.3526
ILMN_1694268	HES6	0.0137035	-1.35695
ILMN_1683664	LOC650369	0.0310309	-1.35932
ILMN_1738093	TMEM118	0.00144666	-1.35999
ILMN_1709257	DSCR6	0.00649919	-1.36108
ILMN_1670353	RAD51AP1	0.00535948	-1.36188
ILMN_1690442	C18orf45	0.0261938	-1.36615
ILMN_1686082	C14orf79	0.00666378	-1.36635
ILMN_1789349	UBQLN4	0.00433075	-1.36777
ILMN_1676665	CUEDC1	0.0132012	-1.37676
ILMN_1897310		0.0198149	-1.3775
ILMN_1751328	FAM83H	0.0439254	-1.37833
ILMN_1685928	WDR34	0.00389318	-1.38107
ILMN_1708728	H2AFJ	0.0195791	-1.38144
ILMN_1726516	SCRIB	0.00336274	-1.38234
ILMN_1695731	TUBG1	0.00289947	-1.38347
ILMN_1730809	SLC29A2	0.00549078	-1.38358
ILMN_1677108	CAPN13	0.0208585	-1.38415
ILMN_1793201	HAGHL	0.00332252	-1.38437
ILMN_1787815	TRIB3	0.0124147	-1.38639
ILMN_1698185	WDR90	0.010144	-1.38641
ILMN_1763884	Magmas	0.00332599	-1.38779
ILMN_1753196	PTTG1	0.0110915	-1.38832
ILMN_1685916	KIF2C	0.000646365	-1.38878
ILMN_1673721	EXO1	0.000690971	-1.39093
ILMN_1766658	PKMYT1	0.00259442	-1.39177
ILMN_1657796	STMN1	0.00251703	-1.399
ILMN_1715583	BOP1	0.0020277	-1.39984
ILMN_1746031	RIMS4	0.0403669	-1.40226
ILMN_1685703	ACOX2	0.026474	-1.40262
ILMN_1757660	CAPS	0.00450756	-1.40967
ILMN_1695414	ASF1B	0.000784851	-1.41242
ILMN_1674706	MTHFD2	0.000784851	-1.41353
ILMN_1796074	C18orf56	0.00112102	-1.4149
ILMN_1741133	NME1	0.00640974	-1.4154
ILMN_1673673	PBK	0.0014083	-1.42017
ILMN_1732516	KNTC1	0.00112102	-1.42074
ILMN_1687867	LOC647954	0.0282853	-1.42134
ILMN_1787628	NOP56	0.0023695	-1.42168
ILMN_1708101	LMNB2	0.00360633	-1.42298
ILMN_1691290	CELSR3	0.0100785	-1.4256
ILMN_1806040	TYMS	0.017729	-1.42657
ILMN_1735093	TIMELESS	0.000766183	-1.4307
ILMN_1703906	HJURP	0.00061228	-1.43202
ILMN_1709294	CDCA8	0.00050549	-1.43315
ILMN_1651237	CDT1	0.00265666	-1.43393
ILMN_1788166	TTK	0.000676241	-1.43466
ILMN_1746252	LOC391811	0.00218478	-1.43481
ILMN_1747016	CEP55	0.00108168	-1.43846
ILMN_1725678	GFRA1	0.0141791	-1.43887
ILMN_1770678	CBX2	0.00265666	-1.43952
ILMN_1683475	TOMM40	0.0029045	-1.44284
ILMN_1663195	MCM7	0.00112102	-1.44541
ILMN_1728298	SBK1	0.0091529	-1.44914
ILMN_1740291	POLQ	0.00050549	-1.4496
ILMN_1711208	CELSR2	0.00120942	-1.45046
ILMN_1710962	TMEM97	0.00050549	-1.45476
ILMN_1654268	HMGB2	0.00108168	-1.46467
ILMN_1751776	CKAP2L	0.00209876	-1.47677
ILMN_1747020	SGK3	0.0146495	-1.48102
ILMN_1756705	CHTF18	0.00389318	-1.48233
ILMN_1671971	LOC644743	0.0466647	-1.48335
ILMN_1660793	PAQR4	0.00124997	-1.48399
ILMN_1702197	C9orf140	0.00821987	-1.48585
ILMN_1681754	GGH	0.0172267	-1.49819
ILMN_1663113	TTLL12	0.00720188	-1.50095
ILMN_1785756	LOC731314	0.00572255	-1.503
ILMN_1719599	SYTL4	0.00889324	-1.50517
ILMN_1708341	PDZK1	0.0270789	-1.5073
ILMN_1681503	MCM2	0.000676241	-1.50836
ILMN_1682717	IER3	0.0406197	-1.51327
ILMN_1772686	FGD3	0.0323212	-1.52616
ILMN_1782045	FKBP4	0.00488005	-1.52837
ILMN_1657547	CCDC34	0.00112102	-1.53337
ILMN_1759184	C19orf48	0.0014083	-1.53371
ILMN_1703092	RECQL4	0.00511443	-1.53795
ILMN_1700337	TROAP	0.0014083	-1.53917
ILMN_1684217	AURKB	0.000970172	-1.54898
ILMN_1751444	NCAPG	0.000523187	-1.56628
ILMN_1691237	CAP2	0.00282997	-1.57404
ILMN_1796589	TRIP13	0.00050549	-1.59231
ILMN_1812073	ATP6V1B1	0.00387357	-1.5977
ILMN_1720373	SLC7A5	0.00392255	-1.59966
ILMN_1716925	FSIP1	0.00304955	-1.63203
ILMN_1759766	CTXN1	0.0116664	-1.63772
ILMN_1711470	UBE2T	0.000498435	-1.67795
ILMN_1777233	E2F2	0.000713987	-1.68398
ILMN_1720998	CA12	0.0119387	-1.70399
ILMN_1814151	AGR2	0.0186195	-1.7172
ILMN_1695658	KIF20A	0.00050549	-1.72312
ILMN_1753584	KRT8	0.0131977	-1.72765
ILMN_1806037	TK1	0.00112102	-1.7278
ILMN_1680955	AURKA	0.00106854	-1.72833
ILMN_1815184	ASPM	0.000151065	-1.72839
ILMN_1711894	MYB	0.00549078	-1.73389
ILMN_1809590	GINS2	0.00112102	-1.74872
ILMN_1723123	FGFR3	0.0155947	-1.76641
ILMN_1801939	CCNB2	0.00050549	-1.79341
ILMN_1688480	CCND1	0.00227913	-1.82014
ILMN_1808591	LOC731049	0.00341673	-1.82987
ILMN_1759910	SERPINA5	0.00537796	-1.84262
ILMN_1683450	CDCA5	0.000498435	-1.87688
ILMN_1786065	UHRF1	0.000970172	-1.8953
ILMN_1664516	CENPF	0.000151065	-1.90156
ILMN_1811387	TFF3	0.00112102	-1.94544
ILMN_1726720	NUSAP1	0.000561709	-1.94745
ILMN_1785570	SUSD3	0.00160382	-1.96151
ILMN_1758164	STC1	0.00532526	-1.9695
ILMN_1728934	PRC1	0.00050549	-1.97153
ILMN_1788874	SERPINA3	0.0199123	-1.99682
ILMN_1898518		0.00124997	-2.30556
ILMN_1722489	TFF1	0.00124997	-2.35191
ILMN_1691884	STC2	0.0118623	-2.35802
ILMN_1714730	UBE2C	0.00050549	-2.35842
ILMN_1826165		0.000646365	-2.38378
ILMN_1686097	TOP2A	0.000498435	-2.47144
ILMN_1663390	CDC20	0.000393967	-2.47158

## Sheet: F vs C (IN VITRO PROBES=5011)
Illumina Probe ID	Gene Symbol	Corrected p-value (48H Fulvestrant vs. 48H E2)	Fold-Change (48H Fulvestrant vs. 48H E2)
ILMN_1770338	TM4SF1	5.07793e-05	9.32008
ILMN_1677814	ABCC3	1.08232e-05	8.82031
ILMN_1801442	KRT81	7.00876e-05	7.40094
ILMN_1655637	UPK1A	1.66673e-05	7.39815
ILMN_1781388	PGM5	1.96726e-05	6.97215
ILMN_1791147	YPEL3	4.41175e-07	6.82154
ILMN_1740276	CLDN9	3.41489e-05	6.69291
ILMN_1780170	APOD	1.08232e-05	6.59713
ILMN_1705814	KRT80	5.93209e-05	6.39389
ILMN_1794863	CAMK2N1	1.25706e-06	6.28534
ILMN_1709590	PGM5	1.6248e-05	6.28102
ILMN_1734276	PMEPA1	2.95523e-06	6.25057
ILMN_1756417	ANKRD37	4.00077e-06	5.88497
ILMN_1659047	HIST2H2AA3	6.77425e-06	5.79668
ILMN_1775743	BTG1	0.000190421	5.67696
ILMN_1708934	ADM	1.29854e-05	5.3932
ILMN_1673409	MGC16121	4.39953e-05	5.32082
ILMN_1736670	PPP1R3C	5.40237e-05	5.13477
ILMN_1752813	UGT1A6	0.000314722	5.08801
ILMN_1706390	UGT1A6	0.000458046	5.06823
ILMN_1756541	MXD4	6.30189e-05	4.94043
ILMN_1694548	ANXA3	3.49354e-05	4.90454
ILMN_1796423	CLIC3	6.87573e-05	4.87304
ILMN_1711069	YPEL5	9.4782e-05	4.81171
ILMN_1784602	CDKN1A	3.94088e-05	4.59899
ILMN_1769546	RIN2	1.81955e-05	4.59074
ILMN_1651496	HIST1H2BD	7.84338e-06	4.51255
ILMN_1672022	EPHA4	3.29026e-05	4.36631
ILMN_1778668	TAGLN	0.000144741	4.26923
ILMN_1695354	BMF	8.93858e-06	4.23443
ILMN_1676663	TNFRSF11B	0.000134767	4.06503
ILMN_1680110	C10orf116	4.01319e-05	3.92412
ILMN_1781374	TUFT1	3.94088e-05	3.91481
ILMN_1798360	CXCR7	1.36089e-05	3.85987
ILMN_1706505	COL5A1	0.000107775	3.85935
ILMN_1666845	KRT17	0.000156056	3.85492
ILMN_1770084	TACC1	2.5821e-05	3.85067
ILMN_1661599	DDIT4	4.85503e-05	3.83519
ILMN_1797585	MYO1B	6.02373e-05	3.80929
ILMN_1714108	TP53INP1	0.000138217	3.72169
ILMN_1735877	EFEMP1	0.00015691	3.61674
ILMN_1732071	HIST2H2BE	0.00019904	3.60742
ILMN_1667893	TNS3	1.81955e-05	3.54771
ILMN_1774901	GDPD3	0.000224141	3.52049
ILMN_1808404	RHBDF1	0.000107775	3.49111
ILMN_1688775	METRNL	1.06209e-05	3.44194
ILMN_1724686	CLDN1	3.41494e-05	3.43554
ILMN_1740426	RASD1	8.37481e-05	3.40466
ILMN_1719986	PIK3IP1	8.57482e-05	3.39032
ILMN_1723198	CDKN2B	0.000723269	3.38753
ILMN_1699574	NRP1	7.00294e-05	3.37382
ILMN_1682738	SMAD3	6.27845e-05	3.35007
ILMN_1785646	PMP22	0.000149841	3.3335
ILMN_1655261	ERP27	8.93858e-06	3.32281
ILMN_1796461	PRSS8	0.000226852	3.31825
ILMN_1771538	PSCA	1.95774e-05	3.25617
ILMN_1748124	TSC22D3	0.000293414	3.23592
ILMN_1744635	IGDCC3	2.50787e-05	3.18733
ILMN_1694840	MATN2	0.000105415	3.16476
ILMN_1795835	LOC338758	3.78823e-05	3.15251
ILMN_1722872	MYH9	0.000503721	3.15108
ILMN_1684873	ARSD	2.3105e-05	3.14037
ILMN_1790014	METRNL	0.000567612	3.121
ILMN_1696731	LOC652683	0.000330031	3.11238
ILMN_1745471	IRF9	0.00150652	3.08528
ILMN_1750324	IGFBP5	3.16872e-05	3.07584
ILMN_1705116	C6orf85	8.02977e-05	3.07413
ILMN_1837428		8.41169e-05	3.0712
ILMN_1787509	PRIC285	0.000335225	3.06858
ILMN_1759676	HOXC13	0.000156056	3.06589
ILMN_1652409	SPATA7	8.79651e-05	3.06328
ILMN_1663092	CITED2	8.2197e-05	3.06202
ILMN_1732296	ID3	0.000138422	3.05455
ILMN_1689004	TNFRSF12A	0.000793776	3.03401
ILMN_1668194	LMTK3	7.2977e-05	3.02828
ILMN_1708016	C20orf108	4.29717e-05	3.02063
ILMN_1724250	GRN	3.08391e-05	3.01198
ILMN_1810864	PMP22	0.000914356	2.99055
ILMN_1655595	SERPINE2	1.08232e-05	2.98169
ILMN_1735014	KLF6	2.80889e-05	2.96042
ILMN_1668863	LYPD1	6.34147e-05	2.95999
ILMN_1779015	ZNF467	0.000250068	2.95187
ILMN_1675656	PPFIBP2	2.9466e-05	2.92914
ILMN_1679093	ZNF581	6.02373e-05	2.89411
ILMN_1795298	GPER	0.000572454	2.89205
ILMN_1659215	CYP4B1	0.000210881	2.85709
ILMN_1651958	MGP	4.14418e-05	2.85673
ILMN_1805519	CD24	0.00282131	2.85007
ILMN_1758672	FAM107B	1.70587e-05	2.83876
ILMN_1663080	LFNG	1.08232e-05	2.8101
ILMN_1752249	FAM38A	0.000344526	2.80999
ILMN_1703531	S1PR3	0.000223839	2.80791
ILMN_1653415	SPANXA2	0.000288072	2.80469
ILMN_1796179	HIST1H2BK	0.000220035	2.80407
ILMN_1770787	DDAH2	0.000209914	2.79866
ILMN_1660199	ACAA2	0.000179574	2.79749
ILMN_1713744	C14orf132	0.000221428	2.79651
ILMN_1706687	KLHL5	4.87738e-05	2.79217
ILMN_1811702	GRN	6.77425e-06	2.78975
ILMN_1705144	ULK1	6.08772e-05	2.77483
ILMN_1800425	SLC9A1	0.00048931	2.77478
ILMN_1811272	GPR81	1.08232e-05	2.76879
ILMN_1763666	ALDH3B2	0.0001946	2.76098
ILMN_1666924	PINK1	2.9466e-05	2.76063
ILMN_1812526	TGFB2	0.000562416	2.75954
ILMN_1690170	CRABP2	7.87094e-05	2.74636
ILMN_1802615	CDK6	2.00972e-05	2.74502
ILMN_1811921	CSRP1	0.000678335	2.74301
ILMN_1698100	ANXA2P1	2.06477e-05	2.74057
ILMN_1735052	ULK1	0.000636611	2.71158
ILMN_1651964	ABCC5	0.000209914	2.70357
ILMN_1880983		2.22926e-05	2.6942
ILMN_1654118	BCL2L1	0.000105415	2.69094
ILMN_1703123	AXUD1	4.37056e-05	2.67897
ILMN_1790797	VPS28	0.000289651	2.67414
ILMN_1712522	CEACAM6	5.51282e-05	2.67305
ILMN_1801105	PRKCD	0.000139439	2.66537
ILMN_1659936	PPP1R15A	3.46539e-05	2.64696
ILMN_1906187		0.000102339	2.64668
ILMN_1746801	CGN	0.000556334	2.61964
ILMN_1714170	SPSB1	0.000280271	2.61518
ILMN_1755727	KDM5B	3.51983e-05	2.61481
ILMN_1814213	PQLC3	0.000350357	2.60177
ILMN_1685415	HBP1	0.000262134	2.59081
ILMN_1700967	C3orf59	0.00039095	2.58566
ILMN_1770505	BIK	5.75744e-05	2.58495
ILMN_1780825	RRAS	3.59403e-05	2.57933
ILMN_1772686	FGD3	0.000192889	2.5634
ILMN_1809931	NDRG1	0.000438561	2.54937
ILMN_1801610	METRNL	3.78823e-05	2.53354
ILMN_1811624	THADA	0.000166116	2.52018
ILMN_1667626	EGLN3	3.94088e-05	2.51831
ILMN_1701875	ZYX	0.000564185	2.51174
ILMN_1769520	UBE2L6	5.73754e-05	2.51148
ILMN_1796490	GRINA	3.30416e-05	2.51077
ILMN_1673305	RHOC	8.04339e-05	2.50423
ILMN_1680652	SELENBP1	0.00223065	2.49852
ILMN_1679194	UGT2B7	0.000331151	2.49269
ILMN_1703284	SPIRE2	0.000177739	2.49091
ILMN_1755721	FAM63A	0.000152098	2.48968
ILMN_1758623	HIST1H2BD	0.000116597	2.48861
ILMN_1763638	BCAR3	0.000534805	2.48723
ILMN_1879480		0.00030643	2.4818
ILMN_1757837	C6orf165	0.000140709	2.48164
ILMN_1804117	FAM89B	0.000203432	2.47005
ILMN_1724194	NPEPL1	0.00028283	2.45661
ILMN_1758938	SLC31A2	0.000132882	2.45217
ILMN_1751346	ERBB3	0.000328668	2.45093
ILMN_1730487	CALD1	8.93858e-06	2.44306
ILMN_1771987	SLC44A2	0.000220035	2.4363
ILMN_1800787	RFTN1	3.63622e-05	2.43367
ILMN_1693233	KIAA0513	3.94088e-05	2.4292
ILMN_1697317	DYNLRB2	0.000165524	2.42455
ILMN_1682929	SYTL2	0.000151862	2.42275
ILMN_1778523	KLF9	0.000130626	2.42086
ILMN_1752582	RAB5B	8.37355e-05	2.42072
ILMN_1733811	JUP	0.000286818	2.41761
ILMN_1712684	FAM20C	0.000378989	2.41294
ILMN_1771120	TMEM45B	5.56643e-05	2.41032
ILMN_1665994	SILV	0.000423178	2.40615
ILMN_1681081	AGPAT2	0.000310886	2.39814
ILMN_1659990	C7orf68	0.000237402	2.39564
ILMN_1776788	C5orf41	0.000480321	2.38854
ILMN_1726981	VEGFB	0.000136701	2.38786
ILMN_1790689	CRISPLD2	8.72648e-05	2.38759
ILMN_1753342	SAT1	0.000142901	2.38717
ILMN_1671478	CKB	0.000286113	2.38377
ILMN_1669390	PPP1R13L	0.000589715	2.38334
ILMN_1689318	NUAK1	0.00018457	2.38212
ILMN_1776519	RAP1GAP	0.00039903	2.38212
ILMN_1802096	ABTB1	0.000641309	2.37653
ILMN_1672504	PDXK	0.000465255	2.36244
ILMN_1692962	CTDSP2	0.000481187	2.35851
ILMN_1682864	SPSB3	0.00200505	2.35799
ILMN_1765258	HLA-E	8.95761e-05	2.34019
ILMN_1788250	LDOC1	0.00025482	2.33827
ILMN_1699989	BNIPL	0.000255579	2.33662
ILMN_1707695	IFIT1	0.00172129	2.3353
ILMN_1763447	PLXNB2	0.000753866	2.33459
ILMN_1670870	ALCAM	0.000110967	2.33346
ILMN_1713952	C1orf106	0.000108746	2.33238
ILMN_1702835	SH3BGRL	0.00264765	2.32944
ILMN_1736184	GSTM3	3.29026e-05	2.32834
ILMN_1774427	CALCOCO1	8.42352e-05	2.32808
ILMN_1665066	C4orf14	7.26279e-05	2.32762
ILMN_1706531	ABCC5	0.00038581	2.32691
ILMN_1742450	TAPBP	0.00020942	2.3248
ILMN_1685722	EIF4A2	6.40907e-05	2.32444
ILMN_1658835	CAV2	3.43788e-05	2.32346
ILMN_1804461	MYH14	0.000370069	2.32108
ILMN_1752451	CTSH	0.000312498	2.31781
ILMN_1802888	ZNF185	0.000136701	2.30446
ILMN_1674063	OAS2	0.000407369	2.30253
ILMN_1668134	GSTM1	2.99904e-05	2.30103
ILMN_1708375	IRF1	0.000561062	2.30072
ILMN_1794782	ABCG1	0.00108747	2.29108
ILMN_1779171	SGSM2	5.07793e-05	2.28021
ILMN_1674661	CIRBP	0.000798036	2.27988
ILMN_1756992	MUC1	0.000226852	2.27509
ILMN_1690921	STAT2	9.46355e-05	2.275
ILMN_1687315	RXRA	5.2032e-05	2.27361
ILMN_1693630	C16orf7	0.000244708	2.27036
ILMN_1754969	LMCD1	0.000185696	2.26598
ILMN_1677843	RAB24	0.000385016	2.26558
ILMN_1664861	ID1	0.000859269	2.25305
ILMN_1770085	BTG2	0.000595088	2.25195
ILMN_1791726	TUBB3	0.000209914	2.25191
ILMN_1670272	LRP10	0.00204369	2.2463
ILMN_1723843	CSNK2A2	1.36089e-05	2.24142
ILMN_1737157	GRAMD1A	0.000968479	2.23586
ILMN_1685397	ITGA3	0.000132882	2.22236
ILMN_1733248	NRBP2	0.00135062	2.22231
ILMN_1705231	SLCO2A1	0.000109597	2.2223
ILMN_1797557	PLEKHA6	0.00017394	2.22009
ILMN_1720865	OSBPL7	0.000347844	2.21666
ILMN_1789095	BMPR2	0.000579971	2.21062
ILMN_1803219	TMC4	0.000126848	2.20436
ILMN_1707727	ANGPTL4	0.00025784	2.20373
ILMN_1730670	FSTL3	0.000743605	2.20326
ILMN_1792689	HIST1H2AC	0.00055692	2.20249
ILMN_1728799	FBP1	0.000192474	2.20148
ILMN_1761946	PROM2	0.000199388	2.19655
ILMN_1728049	S100A16	0.00100188	2.19495
ILMN_1762899	EGR1	0.000311685	2.19085
ILMN_1752968	LAMB2	0.000339646	2.18956
ILMN_1712231	SH3YL1	0.0003676	2.18638
ILMN_1666109	MB	0.000732172	2.18304
ILMN_1803277	MVP	8.90782e-05	2.17973
ILMN_1703891	TBC1D9	8.06391e-05	2.17952
ILMN_1770454	AGRN	0.00062167	2.17929
ILMN_1726108	LASS2	0.000232068	2.17778
ILMN_1725079	TSPAN31	0.000164804	2.17024
ILMN_1803408	KRT18	0.00141511	2.16816
ILMN_1673880	EFEMP1	0.00209406	2.16429
ILMN_1654392	KHNYN	0.000646603	2.16256
ILMN_1802053	ZNF91	0.000907499	2.16108
ILMN_1801216	S100P	0.000330547	2.15794
ILMN_1715013	ERMAP	0.000261733	2.15603
ILMN_1671703	ACTA2	0.000110662	2.15602
ILMN_1764609	PWWP2B	0.000156056	2.15537
ILMN_1794914	UBTD1	0.00184056	2.15331
ILMN_1723020	MAP3K1	0.000219733	2.15168
ILMN_1656940	ABLIM3	4.75004e-05	2.15067
ILMN_1665526	TCEA2	0.00040633	2.14887
ILMN_1726460	RPL14	0.0049205	2.14802
ILMN_1717165	IGBP1	0.000136701	2.14766
ILMN_1687384	IFI6	0.00120702	2.14608
ILMN_1730568	ZDHHC7	0.0018489	2.1447
ILMN_1787673	PLLP	0.000413084	2.14355
ILMN_1796712	S100A10	3.32776e-05	2.14178
ILMN_1795937	VIL2	0.000978373	2.14139
ILMN_1669433	KIAA0913	8.42352e-05	2.13906
ILMN_1770245	EPB41L5	0.000114568	2.13897
ILMN_1682930	SIPA1	1.77373e-05	2.13773
ILMN_1750101	S100A11	0.000166603	2.13613
ILMN_1659845	KIAA0355	5.69914e-05	2.13544
ILMN_1750409	RAB9A	0.000132133	2.13539
ILMN_1787691	CITED4	0.000731292	2.13396
ILMN_1716875	CTNND2	2.80889e-05	2.13319
ILMN_1702247	CCNDBP1	0.000487595	2.13234
ILMN_1749118	CALML5	0.000639208	2.12812
ILMN_1739238	L1CAM	0.000751294	2.12796
ILMN_1653711	FZD2	2.22926e-05	2.12792
ILMN_1672605	C7orf41	2.80889e-05	2.12751
ILMN_1740010	PCNX	0.0003275	2.12673
ILMN_1840316		0.000156056	2.12666
ILMN_1805543	ADAMTS9	0.000320064	2.1258
ILMN_1746403	GTF2IRD2P	0.000559796	2.12344
ILMN_1671565	RNASET2	0.000204567	2.12101
ILMN_1662340	ZNF358	5.49543e-05	2.1178
ILMN_1681628	ZNF277	0.000675818	2.1142
ILMN_1810147	ZNF524	0.000556166	2.11178
ILMN_1814106	C9orf169	3.63622e-05	2.11043
ILMN_1740466	FAM46A	7.83446e-05	2.10256
ILMN_1687652	TGFB3	0.00049405	2.09559
ILMN_1813314	HIST1H2BK	0.00112508	2.09384
ILMN_1717793	C19orf33	0.000308274	2.08996
ILMN_1723141	OTUD1	0.000707496	2.08931
ILMN_1770290	CNN2	0.000126849	2.08842
ILMN_1785071	SEPP1	0.000920192	2.08362
ILMN_1804663	THBS3	0.000850942	2.07961
ILMN_1659106	PHLDA3	0.000282381	2.07714
ILMN_1812262	DDR1	0.00128332	2.07711
ILMN_1653934	LOC650517	3.07726e-05	2.07516
ILMN_1668743	LOC728069	0.000726721	2.07303
ILMN_1670899	FBN2	3.40335e-05	2.07236
ILMN_1779448	EFHD1	0.000207031	2.06858
ILMN_1718558	PARP12	0.000114125	2.06485
ILMN_1779147	ENC1	0.000602277	2.06265
ILMN_1721626	ARID5B	8.53672e-05	2.05711
ILMN_1669878	GUSB	0.000248618	2.0561
ILMN_1771333	CD47	0.000459386	2.05442
ILMN_1749838	MZF1	0.000502006	2.05282
ILMN_1709067	SAMD11	0.000879558	2.0526
ILMN_1690703	C21orf34	0.000466012	2.05018
ILMN_1819608		0.000731292	2.04597
ILMN_1703041	IDUA	0.000224141	2.04491
ILMN_1749915	C1orf63	0.00355174	2.04459
ILMN_1667295	VASN	0.000330606	2.04126
ILMN_1765459	S100A13	0.000111341	2.04069
ILMN_1760556	C1orf63	0.0074713	2.03765
ILMN_1815745	SOX4	0.000497457	2.03182
ILMN_1660186	SYF2	0.000190421	2.02977
ILMN_1658015	MBNL2	0.00116762	2.02877
ILMN_1781285	DUSP1	0.000508045	2.0272
ILMN_1739428	IFIT2	0.000165524	2.02503
ILMN_1806030	PPL	0.000912411	2.02467
ILMN_1785330	SH3BP4	0.000161505	2.02434
ILMN_1698732	PALLD	1.81955e-05	2.02251
ILMN_1773154	NFKBIA	0.000140261	2.02185
ILMN_1658709	LAMB1	0.000358088	2.02121
ILMN_1771746	C6orf165	0.00174701	2.02104
ILMN_1849186		0.00101492	2.01973
ILMN_1763144	NEU1	2.76123e-05	2.01685
ILMN_1812926	ANTXR2	2.30237e-05	2.01532
ILMN_1674817	C1orf115	0.00150863	2.01317
ILMN_1697267	PRKCZ	0.00132494	2.01043
ILMN_1687583	CAV1	0.000760344	2.00719
ILMN_1699631	GATS	0.000707156	2.00626
ILMN_1737089	CAPN5	0.000335534	2.00557
ILMN_1751034	ITPRIPL2	0.000636611	2.00399
ILMN_1681703	FOXO3	0.000181205	2.00349
ILMN_1691364	STAT1	0.00428502	2.003
ILMN_1672589	SEMA4B	0.000152098	2.00163
ILMN_1781580	BRI3	0.000156056	1.99462
ILMN_1679133	SERPINB1	0.000532226	1.99207
ILMN_1703955	FBXO32	0.00064262	1.98979
ILMN_1712095	FOXO4	8.02977e-05	1.98638
ILMN_1803392	TAX1BP3	0.016879	1.98579
ILMN_1767068	SMAD6	0.000438561	1.98058
ILMN_1680132	CADM1	0.000249906	1.98004
ILMN_1698766	PYCARD	0.00020506	1.97926
ILMN_1769201	ELF3	0.000145239	1.97805
ILMN_1651438	ZFPM1	0.000116597	1.97783
ILMN_1700384	KIAA1522	0.000249906	1.97753
ILMN_1809467	VAMP5	0.00028157	1.97692
ILMN_1756999	RBL2	0.00135037	1.97013
ILMN_1806907	PAWR	0.000362479	1.9692
ILMN_1738552	SLC1A3	5.53891e-05	1.96867
ILMN_1812995	CTSL1	0.000471265	1.96696
ILMN_1785661	FAM108B1	0.00034805	1.96503
ILMN_1763228	MEF2D	0.000312498	1.96407
ILMN_1777644	PIB5PA	1.06209e-05	1.96227
ILMN_1764230	GNPTG	0.00449859	1.95982
ILMN_1808326	NPAS3	0.000379729	1.95929
ILMN_1759513	RND3	0.00131083	1.95738
ILMN_1676358	RALB	0.00132424	1.95552
ILMN_1698605	TMEM43	0.000573317	1.95355
ILMN_1747577	ALAD	0.000376796	1.94727
ILMN_1811574	MAPK8IP3	0.000161505	1.9452
ILMN_1761058	ACAD11	0.0119147	1.94363
ILMN_1677200	CYFIP2	0.00779644	1.94322
ILMN_1722156	RWDD2A	0.00048931	1.94248
ILMN_1670130	ARID3A	0.000331151	1.94023
ILMN_1671583	MKRN1	0.000358088	1.93834
ILMN_1803018	KIFC2	0.000149841	1.93806
ILMN_1801845	DNAL4	0.000185696	1.93413
ILMN_1790317	RAB26	0.000636057	1.93406
ILMN_1704294	CDH3	0.000830943	1.93388
ILMN_1797522	DUSP3	0.000282381	1.93379
ILMN_1777342	PREX1	0.000533496	1.93287
ILMN_1651429	SELM	3.94088e-05	1.93213
ILMN_1663640	MAOA	0.000278321	1.93203
ILMN_1814790	SHANK2	0.000315381	1.9318
ILMN_1697420	TINF2	0.00232681	1.93108
ILMN_1746948	MYL5	0.00113325	1.92941
ILMN_1654609	TIGA1	0.000351554	1.92915
ILMN_1669376	DRAM1	0.000328668	1.92855
ILMN_1690963	ASAP1	0.000308883	1.92637
ILMN_1725338	CLDN23	0.000190164	1.92622
ILMN_1699856	RALGDS	0.000151862	1.92424
ILMN_1755897	UGT2B7	0.000158171	1.92393
ILMN_1711888	COBL	0.000248618	1.92339
ILMN_1718303	PVRL2	0.000437733	1.92266
ILMN_1752793	SAP18	5.51282e-05	1.92228
ILMN_1681984	GALNT10	0.00131083	1.92131
ILMN_1739558	CRELD1	0.000156056	1.91777
ILMN_1782743	LETMD1	0.000567612	1.91244
ILMN_1785266	OFD1	0.000596618	1.91154
ILMN_1755582	PCSK1N	8.54022e-05	1.91076
ILMN_1673509	RPL28	0.000850942	1.90974
ILMN_1656369	C8orf4	0.000116597	1.90933
ILMN_1673352	IFITM2	0.000588809	1.90894
ILMN_1733110	RASSF7	1.68106e-05	1.90825
ILMN_1661755	FAM129B	0.000221428	1.90765
ILMN_1752932	MPZL2	0.00108547	1.907
ILMN_1743078	LOC643031	0.000696197	1.90489
ILMN_1729237	CYB5R1	0.0014133	1.90398
ILMN_1796762	CCDC102A	0.00120508	1.90383
ILMN_1815308	SDC1	6.88876e-05	1.90167
ILMN_1806733	COL18A1	0.00135528	1.90153
ILMN_1721046	PTMS	0.000131861	1.89901
ILMN_1797005	PGLS	0.000119249	1.89839
ILMN_1790533	PHACTR2	0.00667809	1.89792
ILMN_1687247	SPATA20	0.000795194	1.8959
ILMN_1658624	UBXN6	0.000651947	1.89414
ILMN_1656482	OSBPL2	0.000715323	1.88927
ILMN_1671568	ECHDC2	1.77373e-05	1.88849
ILMN_1695606	EFNB3	0.000366647	1.88567
ILMN_1764500	C3orf10	0.0134883	1.88505
ILMN_1713636	S100A6	3.80662e-05	1.88278
ILMN_1760174	MCCC1	0.000497803	1.88254
ILMN_1777325	STAT1	0.00104279	1.8823
ILMN_1812666	DNAJC15	0.000464186	1.8815
ILMN_1699829	CTGF	0.000221428	1.88073
ILMN_1760303	PIK3R1	0.000438561	1.88004
ILMN_1700733	KIAA1370	0.000487588	1.87845
ILMN_1774261	DOK4	0.000198107	1.87744
ILMN_1651799	SLC38A2	0.000198107	1.87556
ILMN_1795300	FLJ41603	0.000205506	1.87345
ILMN_1679797	ADARB1	0.00103679	1.87295
ILMN_1756146	WDR45	0.000203124	1.87262
ILMN_1791912	SIDT2	0.00200525	1.87183
ILMN_1732176	AGPAT2	0.000351554	1.8702
ILMN_1690105	STAT1	0.00176772	1.87017
ILMN_1695687	SALL4	0.00055692	1.86889
ILMN_1805512	WDR13	0.00139802	1.86854
ILMN_1769926	DBN1	0.00126829	1.86641
ILMN_1808157	RUNDC3B	0.000931408	1.86624
ILMN_1723042	CLDN3	0.00115769	1.86582
ILMN_1730054	GSTT1	0.000335534	1.8658
ILMN_1814726	SCARB2	0.000132538	1.86518
ILMN_1708143	FAM127A	0.00271767	1.86323
ILMN_1737426	PCMTD1	0.000641309	1.86176
ILMN_1737308	GLRX	0.000487588	1.86174
ILMN_1772189	ABCD1	0.000242214	1.86121
ILMN_1659782	STK19	0.00214102	1.86015
ILMN_1798308	AHSA2	0.00632289	1.85882
ILMN_1693242	ZNF296	5.38357e-05	1.85839
ILMN_1720430	PPDPF	0.00049405	1.85557
ILMN_1725241	GSTK1	0.0010703	1.85435
ILMN_1746408	MIDN	0.000283536	1.85359
ILMN_1757552	PTRF	0.000218505	1.85327
ILMN_1706511	TEF	0.000781568	1.85165
ILMN_1803772	POLD4	0.0024272	1.85147
ILMN_1731073	CAPN9	0.000334604	1.85117
ILMN_1815012	EXOC7	0.0016952	1.85019
ILMN_1682599	GPRC5A	0.000643219	1.849
ILMN_1739586	FEZ2	0.000351238	1.84871
ILMN_1656111	MYLIP	6.49883e-05	1.84503
ILMN_1704286	FXYD5	4.16279e-05	1.84483
ILMN_1763640	KIAA1602	0.0046052	1.8415
ILMN_1808011	FAM46B	0.000571633	1.84101
ILMN_1740772	APBB3	0.00119237	1.84017
ILMN_1793990	ID2	0.000602277	1.83942
ILMN_1722809	NRCAM	0.000177558	1.83865
ILMN_1801246	IFITM1	0.00020506	1.83817
ILMN_1694432	CRIP2	0.000784198	1.83687
ILMN_1746917	LOC729843	0.000684886	1.83573
ILMN_1687275	JUB	0.0028283	1.83511
ILMN_1739885	SLC41A3	0.000390334	1.83346
ILMN_1773380	UNC13D	0.00146952	1.83113
ILMN_1678143	ARHGDIB	0.000768493	1.82917
ILMN_1915188		0.000871406	1.82637
ILMN_1744268	PLEC1	0.00435904	1.82569
ILMN_1733841	TCF7L1	0.000577343	1.82496
ILMN_1662587	PNPLA7	0.00366043	1.82473
ILMN_1726512	ZSCAN2	0.00698642	1.82309
ILMN_1754842	DLGAP4	0.000763072	1.82219
ILMN_1749109	PSAP	0.00163556	1.8217
ILMN_1661537	LEPROT	0.000254659	1.82145
ILMN_1734483	BSDC1	0.000669742	1.81946
ILMN_1747244	CCNG2	0.00223316	1.81835
ILMN_1728224	OGFR	0.00124686	1.81814
ILMN_1715555	DBP	0.000163654	1.81651
ILMN_1792508	TMEM59	0.000651327	1.81574
ILMN_1726245	TGFBR2	0.000145657	1.81567
ILMN_1751561	CAMK1D	0.000145657	1.81466
ILMN_1800354	CST3	0.00112549	1.81347
ILMN_1712419	DCDC2	0.000156056	1.81327
ILMN_1696187	PYGL	0.000821811	1.8132
ILMN_1804988	MOAP1	0.000530685	1.80995
ILMN_1697448	TXNIP	8.72648e-05	1.80986
ILMN_1745623	EFCAB4A	0.000684141	1.80872
ILMN_1717706	PLK2	0.0024913	1.80858
ILMN_1808587	ZFHX3	0.000474609	1.80765
ILMN_1757644	UBE2H	0.00133138	1.8072
ILMN_1784410	UBP1	0.00827943	1.80515
ILMN_1743241	ARL4A	0.000917202	1.8051
ILMN_1728605	TTC3	0.00237948	1.80475
ILMN_1683277	KIAA0319L	0.00071325	1.80468
ILMN_1728298	SBK1	4.41296e-05	1.7957
ILMN_1689446	EIF3G	0.00131907	1.79463
ILMN_1742427	POLR1D	0.00048931	1.79348
ILMN_1812769	UBXN1	2.99904e-05	1.7933
ILMN_1802603	RFNG	0.00129903	1.79154
ILMN_1755383	LRRC1	0.000209914	1.78859
ILMN_1805765	CMYA5	0.000205506	1.78844
ILMN_1806293	LIN7A	0.000404099	1.78628
ILMN_1703650	TNIP1	0.000902228	1.78509
ILMN_1659029	FAM116B	0.000711234	1.78501
ILMN_1674941	ANO6	0.00132323	1.78478
ILMN_1791826	RAB25	0.00175417	1.78333
ILMN_1802557	HEBP1	0.00756201	1.78126
ILMN_1679322	SH2D4A	0.00184056	1.77287
ILMN_1692865	VPS37D	0.000107775	1.76554
ILMN_1667551	GUSBL1	0.000399519	1.76532
ILMN_1767475	CERK	0.000264116	1.76479
ILMN_1741180	HEXDC	0.000118254	1.76453
ILMN_1658579	CDK5RAP3	0.0204708	1.76367
ILMN_1798181	IRF7	0.00445969	1.76345
ILMN_1808824	NEBL	0.000149251	1.7627
ILMN_1667716	TMEM101	0.00641439	1.76244
ILMN_1805345	MOSPD3	0.000243337	1.76103
ILMN_1688886	GPC5	0.000209914	1.76037
ILMN_1750400	C19orf66	0.000567612	1.76006
ILMN_1796349	SMPDL3A	0.00365015	1.75991
ILMN_1752294	PCDH9	0.000859269	1.75875
ILMN_1713496	ST3GAL5	0.00214486	1.75825
ILMN_1794017	SERTAD1	0.0010223	1.75671
ILMN_1653708	CORO1B	0.00071325	1.75643
ILMN_1710844	PARP10	0.000211631	1.75611
ILMN_1724700	RIOK3	0.00316103	1.75531
ILMN_1756877	C14orf179	0.000225723	1.75518
ILMN_1776724	LYPD6	0.000259077	1.7538
ILMN_1707464	MST1	0.00671802	1.75369
ILMN_1755234	SSH3	0.00365879	1.75147
ILMN_1709451	TFPT	0.00117261	1.74999
ILMN_1791580	FXYD3	0.00125128	1.74957
ILMN_1728426	INPPL1	0.00595176	1.74941
ILMN_1714527	VAMP3	0.000636219	1.7485
ILMN_1770425	CDIPT	0.00120469	1.74691
ILMN_1803211	FBXO2	0.000129789	1.74687
ILMN_1768575	SFTPD	0.000209914	1.74646
ILMN_1683328	IP6K2	0.00130124	1.74514
ILMN_1795836	C21orf57	0.00108535	1.74442
ILMN_1810962	PTPRK	0.000318073	1.74395
ILMN_1689908	ANKRD13A	0.000958949	1.7418
ILMN_1814971	TCF25	0.00137912	1.74112
ILMN_1711899	ANXA2	0.00464211	1.74069
ILMN_1652082	ELF4	0.000301213	1.73931
ILMN_1683932	ZNF425	0.000341538	1.7388
ILMN_1813561	SCIN	0.000505112	1.73879
ILMN_1719972	PLXNA3	0.000217629	1.73872
ILMN_1741440	SLC35A1	0.00247663	1.7373
ILMN_1655429	TNFAIP1	0.000212224	1.73724
ILMN_1751161	COL7A1	0.00566543	1.73694
ILMN_1751425	ERMP1	0.00135528	1.73589
ILMN_1697597	KIAA0494	0.000342203	1.73587
ILMN_1718950	ZNF433	0.00041111	1.73531
ILMN_1749115	RTN2	0.00239407	1.73531
ILMN_1705346	NBEA	6.88876e-05	1.73248
ILMN_1789419	EXOC3	0.00238629	1.73239
ILMN_1757388	OCEL1	0.00227827	1.73163
ILMN_1758941	REEP5	0.00123549	1.73139
ILMN_1730539	NPHP3	0.000349979	1.73117
ILMN_1782057	ATP8B2	0.000897736	1.73102
ILMN_1716547	NAGK	0.00049405	1.72883
ILMN_1683470	TMEM139	0.00072928	1.7283
ILMN_1731224	PARP9	0.00216375	1.72804
ILMN_1892403	SNORD13	0.00734578	1.72731
ILMN_1712628	GTF2IRD1	0.00660654	1.72683
ILMN_1810334	COMMD7	0.0107007	1.7226
ILMN_1684440	PXN	0.00113948	1.72231
ILMN_1740319	IFI27L2	0.000282381	1.72217
ILMN_1802706	IDH3G	0.0044963	1.72136
ILMN_1783798	GAS8	0.00159156	1.72043
ILMN_1697694	ATP6AP1	0.0178878	1.72005
ILMN_1679771	LOC388969	0.000984835	1.71924
ILMN_1675117	HSD17B11	0.000546931	1.71903
ILMN_1753468	CD63	0.00249006	1.71765
ILMN_1711030	OPLAH	0.00171138	1.71717
ILMN_1775703	TRAPPC6A	0.0200237	1.71714
ILMN_1678729	SIL1	0.00217378	1.7145
ILMN_1741711	DOPEY2	0.000151862	1.71293
ILMN_1814039	LOC653086	0.0113597	1.71077
ILMN_1751572	TLE1	0.000469116	1.70811
ILMN_1758250	TRAFD1	0.0178175	1.70526
ILMN_1706441	UPK3B	0.00376677	1.70454
ILMN_1793371	KIAA0430	0.00128332	1.70213
ILMN_1773906	NCOA4	0.000164804	1.70138
ILMN_1762990	KIAA0141	0.000828471	1.70123
ILMN_1731107	CCDC92	0.000580239	1.69948
ILMN_1656057	PLAU	0.00172907	1.69941
ILMN_1745148	ZNFX1	0.000177773	1.69873
ILMN_1741613	SERINC1	0.00695993	1.69749
ILMN_1757877	HCFC1R1	0.00134491	1.69722
ILMN_1721605	SMYD2	0.000188978	1.69712
ILMN_1703301	LOC653479	0.00133296	1.69695
ILMN_1752333	SLC35E1	0.00354628	1.69596
ILMN_1694325	NFIX	0.00335542	1.69579
ILMN_1676449	SLIT2	0.00138143	1.69528
ILMN_1722056	ATP7B	0.000310886	1.69422
ILMN_1743373	DLL1	0.000609444	1.69365
ILMN_1766446	C6orf48	0.00126829	1.6927
ILMN_1711828	ANKRD10	0.00489459	1.69233
ILMN_1776723	PHF11	1.05989e-05	1.69227
ILMN_1810559	RHOQ	0.000793506	1.69215
ILMN_1790807	XPC	0.00133011	1.69134
ILMN_1654262	ZMAT3	0.000327854	1.68974
ILMN_1693119	LYPD6B	0.000902228	1.68964
ILMN_1706571	SLC35D2	0.000966178	1.68913
ILMN_1657996	LOC642035	0.000169889	1.6882
ILMN_1728180	CROP	0.0450163	1.68634
ILMN_1737644	TMEM219	0.000265484	1.68625
ILMN_1803745	SUOX	0.000181205	1.68555
ILMN_1678546	PEX11B	3.80662e-05	1.68535
ILMN_1683755	SOX13	0.000458371	1.68522
ILMN_1787567	TSC22D1	0.00558304	1.68456
ILMN_1882590		0.00091045	1.68347
ILMN_1769092	FAM176B	0.00298822	1.68225
ILMN_1703852	EFNB2	0.00751621	1.68155
ILMN_1760574	RAI2	0.00135528	1.68035
ILMN_1655952	FAM39E	0.000636395	1.67961
ILMN_1865764		0.000139523	1.6796
ILMN_1767848	PCMTD2	0.00485886	1.6795
ILMN_1782751	GLI4	0.000394072	1.67924
ILMN_1685709	TMEM125	0.000638222	1.67761
ILMN_1661197	CLCF1	0.00254111	1.67756
ILMN_1666376	TRIM56	0.000691943	1.67731
ILMN_1801934	SERTAD3	0.000894921	1.67656
ILMN_1754600	FNBP1L	0.000278321	1.67622
ILMN_1714710	CCDC120	0.000286818	1.67528
ILMN_1728478	CXCL16	0.000391433	1.67497
ILMN_1757702	LOC647673	0.000939601	1.6749
ILMN_1724718	NCK2	7.63371e-05	1.67386
ILMN_1784661	TMEM2	0.0120678	1.67306
ILMN_1775405	ARL4A	0.0156332	1.67203
ILMN_1668592	STON1	0.00095272	1.67202
ILMN_1680223	PNPLA8	0.0061008	1.67098
ILMN_1725108	SNX25	0.00037679	1.67059
ILMN_1661439	FLOT1	0.00437188	1.66919
ILMN_1796180	CRY2	0.00153087	1.66888
ILMN_1904054		0.00109792	1.66748
ILMN_1673604	YIPF3	0.00151975	1.66748
ILMN_1670926	CHST15	0.000178942	1.66681
ILMN_1688848	TMEM44	0.00108048	1.66658
ILMN_1799589	NOXA1	0.00245138	1.66247
ILMN_1794187	FBXL3	0.00251058	1.66226
ILMN_1797342	FNBP1	0.00159834	1.6615
ILMN_1728163	CTDSP1	0.000608454	1.6614
ILMN_1760305	KIAA1545	0.00500336	1.6614
ILMN_1763265	CHMP1B	0.00106357	1.66107
ILMN_1683044	PPP1R2	0.000111228	1.66002
ILMN_1764457	LOC339766	0.0025916	1.65977
ILMN_1798288	MOBKL2C	0.00334736	1.65853
ILMN_1676891	CDC2L6	0.00235296	1.65768
ILMN_1736093	SNX33	0.00883933	1.6569
ILMN_1749345	STX5	0.0113597	1.65671
ILMN_1672878	ABR	0.0033375	1.65665
ILMN_1775822	PDGFB	0.000156541	1.65642
ILMN_1695962	SLC12A9	0.00264647	1.65599
ILMN_1710284	HES1	0.000614593	1.65554
ILMN_1734366	RORC	0.00150218	1.65285
ILMN_1682818	TTLL3	0.000596346	1.65276
ILMN_1671839	TAF1C	0.000144308	1.65146
ILMN_1727080	MYO6	0.000106286	1.65136
ILMN_1721411	PARP10	0.00391148	1.65117
ILMN_1714433	MARCKSL1	0.00123466	1.65087
ILMN_1903021		0.000495252	1.64936
ILMN_1691143	RAB18	0.00195061	1.64929
ILMN_1714197	ACSS2	0.00223377	1.64788
ILMN_1712687	PAK2	0.00423832	1.64705
ILMN_1691860	SPRY1	0.00049405	1.64649
ILMN_1652128	LMBRD1	0.00176772	1.64648
ILMN_1782543	EEF1D	0.000351822	1.64599
ILMN_1701466	PEX16	0.0178344	1.64563
ILMN_1653115	ECH1	0.00232908	1.64514
ILMN_1741970	JUP	0.00285266	1.64485
ILMN_1757604	TPM2	8.65372e-05	1.64467
ILMN_1669275	ZNF16	0.000792687	1.64466
ILMN_1723978	LGALS1	0.00277489	1.64335
ILMN_1753101	VTCN1	0.000683803	1.64331
ILMN_1810836	PDE5A	0.00170922	1.64331
ILMN_1720282	NQO1	0.00488748	1.64324
ILMN_1656368	ALDH4A1	0.00223377	1.64323
ILMN_1737561	LOC88523	0.00104349	1.64091
ILMN_1669281	CLN3	0.00263394	1.64089
ILMN_1685122	COL9A2	0.00324831	1.64076
ILMN_1793543	C1orf51	0.000410923	1.64063
ILMN_1768505	IL13RA1	0.0021667	1.64049
ILMN_1812557	CDK5RAP3	0.0028615	1.63951
ILMN_1763091	C14orf43	0.00155272	1.6384
ILMN_1748616	GTF2F1	0.000689067	1.63819
ILMN_1802257	PCTP	0.000897188	1.63795
ILMN_1684497	C10orf33	0.00391867	1.63758
ILMN_1651610	LOC730525	0.00143781	1.63729
ILMN_1750785	SYTL1	0.000405035	1.63675
ILMN_1657235	LOC342979	0.0131567	1.63672
ILMN_1750563	CERCAM	0.00139512	1.63637
ILMN_1658071	ATP1B1	0.000267216	1.63573
ILMN_1768480	VGLL4	0.00112654	1.63473
ILMN_1669516	ZNF193	0.000533496	1.63438
ILMN_1801941	C1orf50	0.0015498	1.63362
ILMN_1711566	TIMP1	0.00266789	1.63314
ILMN_1856480		0.000849623	1.63228
ILMN_1745655	PEX16	0.00253965	1.63142
ILMN_1744517	GNS	7.4833e-05	1.63103
ILMN_1783287	S100A14	0.0172604	1.6307
ILMN_1723123	FGFR3	0.000382251	1.63064
ILMN_1757406	HIST1H1C	0.000458371	1.63052
ILMN_1659766	BAG3	0.000347079	1.63049
ILMN_1778347	NUDT2	0.001094	1.63013
ILMN_1724040	ANKRD57	0.00071325	1.62992
ILMN_1739641	MTMR3	0.00455632	1.62983
ILMN_1779071	FEZ1	0.000344526	1.62849
ILMN_1660749	ASPSCR1	0.00141518	1.62723
ILMN_1651800	GSTM4	0.00251552	1.62665
ILMN_1680453	ITM2C	0.000653397	1.62645
ILMN_1735827	NISCH	0.00381224	1.6255
ILMN_1698243	C1orf85	0.00225616	1.6247
ILMN_1805750	IFITM3	0.00170922	1.62401
ILMN_1742410	BCL2L1	0.00217677	1.62308
ILMN_1789357	DLX3	0.000361421	1.62295
ILMN_1678808	KIAA0831	0.00293894	1.62199
ILMN_1729294	RNF130	0.00398819	1.62156
ILMN_1781155	LYN	0.000166603	1.62079
ILMN_1729453	TSPAN9	0.00191819	1.62079
ILMN_1714393	RAB24	0.000768493	1.62048
ILMN_1742935	ZNF33B	0.00126071	1.62045
ILMN_1743767	ZNF446	0.0017083	1.61965
ILMN_1686750	MGEA5	8.42352e-05	1.61955
ILMN_1812721	LOC728014	0.00422496	1.61943
ILMN_1738849	SLC9A2	0.000522734	1.61936
ILMN_1755937	ANXA2	0.00124856	1.61882
ILMN_1669033	NCOA1	0.00293894	1.61865
ILMN_1812031	PALM	0.00264396	1.6184
ILMN_1741371	TMEM8	0.00162694	1.61732
ILMN_1671365	PRODH	0.000490777	1.61671
ILMN_1750093	SDHALP1	0.00380263	1.61638
ILMN_1794677	TMC6	0.00461092	1.61547
ILMN_1781231	SLC25A38	0.00307851	1.615
ILMN_1768754	PILRB	0.0115812	1.61435
ILMN_1780236	PMM1	0.00423945	1.61415
ILMN_1787923	PNPLA2	0.000334604	1.61378
ILMN_1778360	PYGB	0.000531064	1.61178
ILMN_1656822	DNM2	0.0112467	1.6105
ILMN_1768958	RASGRP1	0.000209914	1.61041
ILMN_1746012	MBD6	0.0129961	1.61011
ILMN_1752728	FUCA1	0.000451524	1.60957
ILMN_1665235	CRTAP	0.00323379	1.60954
ILMN_1712755	LRRC41	0.00657115	1.60922
ILMN_1700306	OCIAD2	0.0105999	1.60717
ILMN_1775823	POFUT2	0.00441434	1.6067
ILMN_1757631	DBNDD1	0.00571022	1.60632
ILMN_1753472	SUMF1	0.00334736	1.60579
ILMN_1665435	GPER	0.0125298	1.60565
ILMN_1781745	C9orf152	0.000659299	1.60552
ILMN_1843932		0.00186485	1.60527
ILMN_1813399	ATP2B1	0.000214062	1.6052
ILMN_1687978	PHLDA1	0.000149804	1.60505
ILMN_1769876	TBC1D2	0.00140565	1.60309
ILMN_1720829	ZFP36	0.000819786	1.60294
ILMN_1780698	ZFYVE19	0.00422496	1.60173
ILMN_1683660	EIF3H	0.00197418	1.6014
ILMN_1684446	SPAG7	0.00173272	1.60138
ILMN_1666004	WASL	0.00071325	1.60111
ILMN_1804629	TPK1	0.000411788	1.60099
ILMN_1714216	TSC2	0.00388303	1.60031
ILMN_1712673	SASH1	0.000432555	1.60024
ILMN_1748827	LOC388564	0.00194401	1.5998
ILMN_1749478	TCEAL3	0.00441059	1.59903
ILMN_1809566	ZSCAN16	0.00888673	1.59875
ILMN_1703244	MAP1LC3B	0.00125128	1.59771
ILMN_1778202	FLJ40722	0.00179871	1.59697
ILMN_1771057	XAB2	0.00129433	1.5961
ILMN_1773073	PHYH	0.000236356	1.59591
ILMN_1766657	STOM	0.00533928	1.59566
ILMN_1663618	STAT3	0.000939601	1.59565
ILMN_1747067	NPAS1	0.00119683	1.59536
ILMN_1789196	TPM2	0.000927296	1.59497
ILMN_1803559	FLJ39632	0.00843377	1.59474
ILMN_1789233	VPS37C	0.00420889	1.59444
ILMN_1674811	OASL	0.00104523	1.59342
ILMN_1770667	HECA	0.0132712	1.59281
ILMN_1765076	APPL2	0.00106706	1.59279
ILMN_1735220	CAV2	0.0129107	1.59187
ILMN_1790249	F8A1	0.00852884	1.59158
ILMN_1694847	TERF1	0.00089617	1.59147
ILMN_1778560	ZNF3	5.17788e-05	1.59049
ILMN_1698419	NCOR2	0.00762278	1.58994
ILMN_1808059	BCAS4	0.0166301	1.58931
ILMN_1763723	PTDSS2	0.000449502	1.5887
ILMN_1673529	AGXT2L2	0.00221805	1.58865
ILMN_1685714	INHBB	0.000859269	1.58813
ILMN_1664068	ERGIC1	0.00113721	1.58779
ILMN_1735180	NCSTN	0.00101485	1.58762
ILMN_1814856	C9orf7	0.000615798	1.58719
ILMN_1769911	SLC38A1	0.0114534	1.58661
ILMN_1800412	BMP1	0.000768493	1.5858
ILMN_1726434	UNC45A	0.0156297	1.58569
ILMN_1700690	VAT1	0.00123521	1.58526
ILMN_1710644	MARVELD3	0.00100517	1.58512
ILMN_1787127	SLC43A2	0.00370637	1.58369
ILMN_1726565	PIK3R2	0.00265634	1.58357
ILMN_1803819	IQGAP1	0.00523648	1.58334
ILMN_1729288	C1QTNF6	0.00311904	1.58281
ILMN_1735788	TRIOBP	0.000219934	1.58253
ILMN_1844692	FOXO3	0.00404987	1.58148
ILMN_1677680	FGF12	0.00412462	1.5814
ILMN_1809141	ING4	0.000156056	1.58107
ILMN_1773352	CCL5	0.0005568	1.58031
ILMN_1731374	CPE	0.00484115	1.58009
ILMN_1758633	CCDC130	0.00187326	1.57938
ILMN_1667711	HRASLS3	0.00112832	1.57869
ILMN_1674633	UBE2H	0.00338396	1.57858
ILMN_1675695	PDS5B	0.0023032	1.57848
ILMN_1665964	GAB2	0.00232486	1.57824
ILMN_1716821	GORASP1	0.00332349	1.57808
ILMN_1750674	SDSL	0.00104366	1.57796
ILMN_1886769		0.00359985	1.57762
ILMN_1738816	FOXO1	0.00605048	1.57695
ILMN_1696254	CYB5D2	0.000274986	1.57672
ILMN_1728521	HDAC7A	0.0154578	1.5752
ILMN_1655922	SAPS2	0.000902228	1.57468
ILMN_1703565	GLTSCR2	0.0154161	1.57389
ILMN_1689110	NOB1	0.00126894	1.5733
ILMN_1754529	SPG7	0.00288332	1.57309
ILMN_1685441	ASAP3	0.00221805	1.57264
ILMN_1798926	SOCS2	0.0222417	1.57251
ILMN_1658989	MEX3B	0.00144533	1.572
ILMN_1741954	SMYD3	0.0015288	1.5712
ILMN_1680840	LOC641941	0.00231417	1.57043
ILMN_1666444	RBMS1	0.000673328	1.56991
ILMN_1696991	DYRK1B	0.00105149	1.56941
ILMN_1796508	TOP1MT	0.0148419	1.56895
ILMN_1747857	SMARCE1	0.0004065	1.56848
ILMN_1746664	WSB2	0.00391364	1.56783
ILMN_1721651	LOC646463	0.000714924	1.56736
ILMN_1769412	RAPGEF1	0.00150524	1.56732
ILMN_1778917	CDK7	0.000667133	1.56714
ILMN_1724211	GPRC5C	0.00102525	1.56632
ILMN_1668185	ZNF282	0.0062521	1.56621
ILMN_1790518	PHF16	0.00225053	1.56589
ILMN_1729987	SRC	0.000405035	1.56535
ILMN_1724946	SPINT1	8.72648e-05	1.56524
ILMN_1682781	TEAD2	0.00164598	1.56329
ILMN_1751079	TAP1	0.00914314	1.56272
ILMN_1803850	TSPAN15	0.000567612	1.5627
ILMN_1723706	GRAMD4	0.00140358	1.5627
ILMN_1759595	C22orf29	0.000366432	1.56151
ILMN_1758831	RNF31	0.00417686	1.56028
ILMN_1733453	LOC284988	0.000107775	1.55984
ILMN_1737604	FLJ10986	0.00523648	1.55875
ILMN_1678531	N4BP3	7.83446e-05	1.55856
ILMN_1792409	AMOT	0.00133682	1.55788
ILMN_1682783	TUG1	0.00398819	1.55752
ILMN_1700202	TMEM135	0.00579413	1.55748
ILMN_1797776	PRSS23	0.00202602	1.55626
ILMN_1689868	TMEM80	0.00020216	1.55571
ILMN_1668514	PIP5K1C	0.00276207	1.55538
ILMN_1711361	ZNF319	0.000864191	1.55528
ILMN_1697544	SLC25A29	0.00049857	1.55478
ILMN_1758731	CYP2J2	0.000760839	1.55442
ILMN_1751963	ZCWPW1	0.00441241	1.55365
ILMN_1795905	ZBTB4	0.0302123	1.55293
ILMN_1697561	FBXL16	0.0203677	1.55291
ILMN_1686082	C14orf79	0.00695993	1.55184
ILMN_1683175	C9orf23	0.000359721	1.55065
ILMN_1666096	ACSL3	0.0171362	1.55007
ILMN_1721833	IER5	0.000209914	1.54968
ILMN_1762747	RPL15	0.00129846	1.54824
ILMN_1798061	ZFYVE26	0.000127834	1.54711
ILMN_1656297	C21orf57	0.00429927	1.54644
ILMN_1760049	SERGEF	0.000671681	1.54602
ILMN_1692707	C2orf79	0.00452778	1.54496
ILMN_1807981	SIGIRR	0.0128973	1.54453
ILMN_1704500	STAP2	0.000611879	1.54399
ILMN_1770824	ARHGAP4	0.0234094	1.54382
ILMN_1793832	GRB14	0.0160379	1.54314
ILMN_1671427	FBXW4	0.000226852	1.54277
ILMN_1705991	GUSBL1	0.00147677	1.54142
ILMN_1712035	TMEM115	0.00762163	1.54104
ILMN_1655876	TMEM159	0.00257703	1.54078
ILMN_1762308	LOC654191	0.0107686	1.54037
ILMN_1797310	ATP6V1D	0.00570686	1.54031
ILMN_1656656	COX19	0.00199908	1.53984
ILMN_1778876	FAM179B	0.000522734	1.53968
ILMN_1709307	GPSM1	0.000696197	1.53955
ILMN_1758895	CTSK	0.00298261	1.5378
ILMN_1797372	C3orf58	0.00247663	1.53735
ILMN_1807767	KIAA0182	0.0151038	1.53697
ILMN_1795561	CAMK1D	0.00444157	1.53651
ILMN_1795582	CHRD	0.000156458	1.53629
ILMN_1751886	REC8	0.00104266	1.53606
ILMN_1653180	TPM4	0.00552865	1.5356
ILMN_1757230	ZNF250	0.000209914	1.5355
ILMN_1732609	KIAA1539	0.00145555	1.5352
ILMN_1732066	CKMT1A	0.000753866	1.53507
ILMN_1780898	PRKCH	0.00211369	1.53374
ILMN_1729801	S100A8	0.000149804	1.53357
ILMN_1662232	DCTN2	0.00639415	1.53323
ILMN_1717477	PSD3	0.0024272	1.53288
ILMN_1664750	TMBIM4	0.00711483	1.53211
ILMN_1776925	PRSS22	0.00439612	1.53184
ILMN_1666050	TMUB1	0.00175685	1.53161
ILMN_1741054	SLC5A6	0.00708064	1.53071
ILMN_1804938	GPR175	0.000914356	1.53057
ILMN_1740685	LOC652541	0.00195563	1.53033
ILMN_1741131	CHRNB1	0.00344518	1.52969
ILMN_1807873	SNX6	0.00515638	1.52896
ILMN_1799614	PNPLA6	0.000248618	1.52854
ILMN_1669484	WDR6	0.0016952	1.52844
ILMN_1733627	NEDD4L	0.000764601	1.52832
ILMN_1680104	SLC35C1	0.00048931	1.52788
ILMN_1667715	LOC645176	0.000286818	1.5277
ILMN_1732612	SHB	0.0151076	1.52718
ILMN_1723678	PRPH	0.00558994	1.527
ILMN_1803673	LOC113230	0.00119257	1.52589
ILMN_1710170	PPAP2C	0.00161875	1.52522
ILMN_1664283	C9orf75	0.00324506	1.52512
ILMN_1668822	BATF	0.0058346	1.52424
ILMN_1771627	ZMIZ1	0.00357308	1.5241
ILMN_1668582	CRBN	0.00318243	1.52244
ILMN_1679614	SGSM3	0.0243703	1.52232
ILMN_1707070	PCOLCE	0.00497041	1.52177
ILMN_1695852	C5orf38	0.00104366	1.52016
ILMN_1688565	ZNF580	0.000147318	1.51964
ILMN_1675038	PRMT2	0.00641439	1.51942
ILMN_1669273	PPT1	0.00252029	1.5188
ILMN_1751330	RBCK1	0.000984352	1.51861
ILMN_1693210	NSMCE2	0.00543058	1.51833
ILMN_1736796	RB1CC1	8.26513e-05	1.51768
ILMN_1716973	POLM	0.000212224	1.51743
ILMN_1719170	WBSCR27	0.00227768	1.51738
ILMN_1739792	RHOG	0.00372132	1.51735
ILMN_1651838	RND1	0.00151863	1.51696
ILMN_1711408	ANXA4	0.0024805	1.51624
ILMN_1747935	GOLGB1	0.00106357	1.51616
ILMN_1792910	MNT	0.00978839	1.51587
ILMN_1795325	ACTG2	0.0101726	1.51548
ILMN_1654398	RGL1	0.000573317	1.51401
ILMN_1771957	MAN1B1	0.0245318	1.51385
ILMN_1809173	LOC729021	0.00343211	1.51307
ILMN_1675640	OAS1	0.0070082	1.51246
ILMN_1764508	PTK6	0.000641148	1.51243
ILMN_1800540	CD55	0.0048497	1.51173
ILMN_1704014	LOC730256	0.00196006	1.51037
ILMN_1746883	SAT2	0.0027415	1.51016
ILMN_1679727	CLK1	0.0339089	1.50985
ILMN_1744381	SERPINE1	0.000854123	1.50982
ILMN_1800590	BBS1	8.57482e-05	1.50848
ILMN_1788223	RSPH3	0.000309317	1.50819
ILMN_1688103	CTNNBIP1	0.00208182	1.5081
ILMN_1798372	ANXA2P3	0.00196909	1.50735
ILMN_1651498	GADD45G	0.00266007	1.50607
ILMN_1763080	QARS	0.00334736	1.50552
ILMN_1761086	VPS54	0.00164018	1.50482
ILMN_1778381	LOC650029	0.00125523	1.50466
ILMN_1654518	LRCH4	0.00310385	1.50425
ILMN_1723962	LXN	0.0170162	1.50423
ILMN_1654851	FAM134A	0.0346196	1.50416
ILMN_1777765	C12orf10	0.00630715	1.50414
ILMN_1706960	KIAA1217	0.000237557	1.50371
ILMN_1657864	TMUB2	0.00162137	1.50225
ILMN_1773901	STX12	0.00210724	1.50209
ILMN_1651735	TGOLN2	0.000905448	1.50191
ILMN_1777113	NEURL2	0.00357542	1.50187
ILMN_1741200	RFX5	0.00835743	1.50154
ILMN_1760335	ADPRHL1	0.00164272	1.50107
ILMN_1774074	RXRB	0.00347552	1.50058
ILMN_1694398	EIF3F	0.00181991	1.50045
ILMN_1780773	LOC400027	0.0195969	1.50007
ILMN_1714599	CAMLG	0.000958949	1.49995
ILMN_1743966	BCL9L	0.0219015	1.49955
ILMN_1772540	ATMIN	0.00182852	1.49946
ILMN_1814204	C21orf55	0.018444	1.49933
ILMN_1719010	ARL4D	0.00110597	1.4983
ILMN_1795826	ATP6V0D1	0.0135904	1.49753
ILMN_1655563	KIAA0427	0.00115621	1.49733
ILMN_1704369	LIMA1	0.00890251	1.49656
ILMN_1711048	ZBTB17	0.00511093	1.49437
ILMN_1813763	SLC20A2	0.00452493	1.49405
ILMN_1783546	CARKD	0.00641299	1.49339
ILMN_1748650	MRPL45	0.00228145	1.49312
ILMN_1804332	GPR137	0.00158967	1.49299
ILMN_1713406	FAM39DP	0.0108224	1.49298
ILMN_1805104	ABAT	0.000320064	1.49294
ILMN_1672295	ZC3H12A	0.00657517	1.49194
ILMN_1792710	DAPK3	0.00062167	1.49184
ILMN_1756590	SYS1	0.00136454	1.49035
ILMN_1733799	FAM195B	0.000978373	1.48948
ILMN_1711596	PQBP1	0.015283	1.48928
ILMN_1758798	LOC728734	0.0112866	1.48777
ILMN_1805668	ZNF486	0.0175692	1.48682
ILMN_1802251	PTTG1IP	0.00721445	1.48671
ILMN_1784333	SECISBP2L	0.00607049	1.48627
ILMN_1708482	TMEM80	0.0012457	1.48614
ILMN_1804490	PRKRIP1	0.00513384	1.4857
ILMN_1807206	DHRS1	0.00213438	1.48529
ILMN_1761531	SGPL1	0.00173714	1.4851
ILMN_1726466	HDHD3	0.00237463	1.48493
ILMN_1742789	LPXN	0.000451606	1.48485
ILMN_1680037	FAM65A	0.0225487	1.48471
ILMN_1742003	RHPN1	0.00183055	1.48422
ILMN_1721704	FNTA	0.000589209	1.48397
ILMN_1670096	NRBP1	0.0273161	1.48385
ILMN_1747460	TMEM184B	0.00824098	1.48356
ILMN_1747281	EVI5L	0.00182852	1.48321
ILMN_1795906	PCBD1	0.0234503	1.48321
ILMN_1784554	LOC647389	0.00444157	1.48304
ILMN_1702501	RPS6KA2	0.0160835	1.48295
ILMN_1805665	FLRT3	4.75004e-05	1.48244
ILMN_1690682	B3GALT4	0.00756299	1.48232
ILMN_1667034	PDPR	0.0108939	1.4823
ILMN_1740351	KIAA0174	0.00137634	1.4817
ILMN_1679401	TRPM4	0.0216892	1.48137
ILMN_1773567	LAMA5	0.00131222	1.48105
ILMN_1745130	RBM9	0.000221428	1.4809
ILMN_1739751	SLC26A11	0.00114452	1.4806
ILMN_1702231	C1orf54	0.00231746	1.4805
ILMN_1657810	PPM1M	0.00330774	1.47959
ILMN_1789492	ZDHHC8	0.00295294	1.47951
ILMN_1741219	RRAGB	0.000278321	1.47898
ILMN_1786893	RBM5	0.0012457	1.47838
ILMN_1738921	ACAA1	0.000795547	1.47676
ILMN_1678998	LRRC14	0.00245713	1.47612
ILMN_1697629	PLA2G4B	0.00751265	1.47579
ILMN_1719343	WDR26	0.00606922	1.47572
ILMN_1789809	LOC644511	0.000669742	1.47524
ILMN_1654542	C5orf21	0.00266174	1.47512
ILMN_1804113	RFXANK	0.00778798	1.47474
ILMN_1718128	PABPC3	0.000266288	1.4747
ILMN_1682081	RNF19B	0.00298798	1.4745
ILMN_1764871	PIGP	0.00529447	1.47427
ILMN_1719286	CTSA	0.00482103	1.47346
ILMN_1767651	TECPR1	0.000359721	1.47343
ILMN_1735361	MAPK11	0.00377158	1.47342
ILMN_1730229	CGNL1	0.00338468	1.47309
ILMN_1665781	LOC390466	0.0292049	1.47307
ILMN_1718129	MAP2K5	0.0030452	1.47175
ILMN_1703005	IFP38	0.00428239	1.47174
ILMN_1654016	MRLC2	0.00430156	1.47173
ILMN_1663401	LARP6	0.00133296	1.4715
ILMN_1710092	ZBTB46	0.00123208	1.47147
ILMN_1774949	PIGP	0.00316677	1.47134
ILMN_1787251	DAAM1	0.0028614	1.47128
ILMN_1676302	FAM113A	0.0032677	1.47093
ILMN_1720850	BAZ2B	0.000714924	1.47091
ILMN_1702124	LNX2	0.000999132	1.47042
ILMN_1669928	ARHGEF16	0.000610161	1.47004
ILMN_1749834	LOC388588	0.00679042	1.46967
ILMN_1683905	C19orf21	0.0114534	1.46874
ILMN_1699931	HCST	0.00249239	1.46853
ILMN_1694514	ZDHHC11	0.00523648	1.46846
ILMN_1788783	TRAM2	0.0024201	1.46831
ILMN_1659312	PMP22	0.0180445	1.46826
ILMN_1781386	WIPI1	0.012445	1.46805
ILMN_1713934	LITAF	0.000378989	1.46784
ILMN_1657632	ZMYM6	0.00744675	1.4676
ILMN_1773337	DKK1	8.72648e-05	1.46714
ILMN_1657631	STAP2	0.0169922	1.46675
ILMN_1670609	ATOX1	0.0333887	1.46675
ILMN_1758806	C21orf2	0.00323947	1.46614
ILMN_1709750	SUSD1	0.00347488	1.46552
ILMN_1770977	TMEM134	0.0036056	1.46541
ILMN_1658677	DTX3	0.0210036	1.46523
ILMN_1747968	RBM33	0.00256574	1.46518
ILMN_1673933	LOC440341	0.0161981	1.46515
ILMN_1658706	ST6GALNAC2	0.000235267	1.46493
ILMN_1739605	LYPD3	0.000803862	1.46488
ILMN_1792587	VPS4B	0.000715323	1.46429
ILMN_1762764	SH3BGRL2	0.000785165	1.46397
ILMN_1761155	PABPC1	0.00126651	1.46395
ILMN_1752927	KIAA1600	0.00425138	1.46376
ILMN_1724666	INADL	0.0004791	1.46309
ILMN_1689831	FLJ11235	0.001476	1.46269
ILMN_1690999	MED23	0.00513903	1.46265
ILMN_1809695	CAMK2G	0.0036237	1.4626
ILMN_1652754	ZNF428	0.0178344	1.46245
ILMN_1799744	GALC	0.00802535	1.46222
ILMN_1733970	BAG1	0.000505112	1.46169
ILMN_1796458	GABARAPL2	0.00390066	1.46169
ILMN_1741491	ZNHIT1	0.00232908	1.46143
ILMN_1697639	OGT	0.00895933	1.46137
ILMN_1772888	LOC645688	0.00126829	1.46114
ILMN_1777378	COMMD6	0.00486452	1.46098
ILMN_1787885	NUDT18	0.00249489	1.46071
ILMN_1768311	LOC728888	0.000363551	1.46065
ILMN_1685156	ADCY6	0.00676622	1.46032
ILMN_1717326	SLC29A3	0.00754678	1.45931
ILMN_1661804	CTF1	0.00253965	1.45924
ILMN_1689552	FAM63A	0.00681784	1.45921
ILMN_1764166	BCKDHB	0.00198944	1.4592
ILMN_1743131	TOX4	0.000999395	1.45891
ILMN_1690040	TM7SF2	0.00545478	1.45875
ILMN_1701413	PIGQ	0.024875	1.45839
ILMN_1658425	DAG1	0.00481205	1.45777
ILMN_1664802	WSB1	0.00815762	1.45774
ILMN_1735930	KLF2	0.00133682	1.45772
ILMN_1667068	ZC3HAV1	0.00738277	1.45763
ILMN_1738229	NDRG3	0.00830139	1.4575
ILMN_1674866	TADA3	0.00596817	1.45663
ILMN_1695435	LOC653610	0.0134744	1.45648
ILMN_1806408	ACADVL	0.00756299	1.45619
ILMN_1677314	MUC1	0.00918951	1.45545
ILMN_1655433	BCKDHB	0.000132538	1.45513
ILMN_1763491	CKMT1B	0.0106855	1.45472
ILMN_1756152	MFSD11	0.000563654	1.4539
ILMN_1762224	HPS3	0.0493114	1.45333
ILMN_1760490	ACVR1	0.00120094	1.45259
ILMN_1795839	SCCPDH	0.00119759	1.45201
ILMN_1663631	BANP	0.00126071	1.45195
ILMN_1773885	DMAP1	0.000532587	1.45186
ILMN_1656934	REPS2	0.000105682	1.45129
ILMN_1810953	LOC653496	0.00445969	1.4512
ILMN_1897741		0.00281084	1.45101
ILMN_1803953	LOC388789	0.00639415	1.45075
ILMN_1777740	C8orf55	0.00577471	1.45048
ILMN_1789614	TPT1	0.00410239	1.45039
ILMN_1682226	CLDN15	0.00450175	1.44997
ILMN_1654370	TESK2	0.00432048	1.44991
ILMN_1655748	ZNF323	0.00057624	1.4499
ILMN_1708041	PLEKHF1	0.0032677	1.44963
ILMN_1803367	EVI1	0.00322006	1.44936
ILMN_1794190	CCPG1	0.00751917	1.44933
ILMN_1737847	RMND5B	0.015527	1.44926
ILMN_1748831	PPP1R13B	0.0116585	1.44866
ILMN_1712487	LGTN	0.0157503	1.44828
ILMN_1812616	MYO1C	0.00985107	1.44814
ILMN_1746704	TRIM8	0.0074428	1.44804
ILMN_1745110	LAPTM4A	0.00223837	1.44786
ILMN_1885728	KIAA1147	0.0126256	1.44754
ILMN_1755281	FBXO15	0.00134274	1.44722
ILMN_1752303	YY1AP1	0.0186873	1.44688
ILMN_1758105	ZNF791	0.0128526	1.44671
ILMN_1674034	H2AFY	0.00305949	1.44654
ILMN_1737343	FNIP1	0.0040552	1.44634
ILMN_1664978	TJP2	0.00111539	1.44627
ILMN_1765858	CAB39	0.00695993	1.44566
ILMN_1688246	LOC642852	0.0046208	1.44528
ILMN_1741356	PRICKLE1	0.00124856	1.44519
ILMN_1791306	C9orf103	0.00908279	1.44505
ILMN_1722738	ROGDI	0.0058346	1.44489
ILMN_1756006	ATG2A	0.000635195	1.44461
ILMN_1673518	BRWD1	0.0003336	1.44457
ILMN_1695485	C9orf109	0.000210881	1.44446
ILMN_1767509	DEF8	0.00902748	1.44432
ILMN_2038772	RPS9	0.00513903	1.44368
ILMN_1658053	DYNLRB1	0.0061165	1.44341
ILMN_1872419		0.00616552	1.44337
ILMN_1772700	TMEM18	0.00211749	1.44336
ILMN_1732967	KIAA1949	0.00543258	1.44321
ILMN_1756937	ST8SIA4	0.00738277	1.44266
ILMN_1683980	PLEKHM2	0.00299167	1.44218
ILMN_1811102	LRSAM1	0.00147748	1.4418
ILMN_1727288	EVPL	0.00247346	1.44178
ILMN_1886487		0.00144533	1.44157
ILMN_1798256	UPP1	0.0391612	1.44112
ILMN_1781097	UBXN4	0.00328601	1.44021
ILMN_1680624	CREG1	0.00964692	1.44001
ILMN_1759341	MAN2B1	0.00243577	1.43976
ILMN_1788955	PDLIM1	0.000315381	1.43939
ILMN_1711608	SSBP2	0.0104683	1.43772
ILMN_1695917	C5orf15	0.0036237	1.43747
ILMN_1801584	CXCR4	0.0208992	1.43738
ILMN_1651254	LPP	0.00226611	1.43735
ILMN_1785528	FAM39DP	0.00217859	1.43729
ILMN_1717056	TXNRD1	0.00469256	1.43719
ILMN_1810467	PPP2R1A	0.00621486	1.43691
ILMN_1764082	MBOAT1	0.00613223	1.43664
ILMN_1658504	CHKA	0.00449238	1.43642
ILMN_1694466	ZBED1	0.000440086	1.43623
ILMN_1777190	CFD	0.00287994	1.43619
ILMN_1657475	GALT	0.0106898	1.43598
ILMN_1753265	C12orf76	0.00305949	1.43522
ILMN_1745904	CCDC6	0.00942447	1.43442
ILMN_1805636	PGAP3	0.00447255	1.43412
ILMN_1800871	RAB6A	0.000221287	1.43404
ILMN_1718046	ARNT2	0.0380632	1.43386
ILMN_1713985	MAF1	0.00698642	1.43365
ILMN_1688780	S100A4	0.00195998	1.43328
ILMN_1654545	CPSF1	0.00776986	1.43325
ILMN_1658802	KRTCAP2	0.00770913	1.43316
ILMN_1786766	SNTB2	0.00663529	1.43229
ILMN_1806387	LOC340598	0.0125004	1.43194
ILMN_1752579	ATP6V0A1	0.0027683	1.4319
ILMN_1707336	ARPC4	0.00963403	1.43167
ILMN_1760180	MID2	0.0095974	1.43161
ILMN_1680018	RIPK4	0.00998907	1.43141
ILMN_1688071	NAT1	0.0206023	1.43132
ILMN_1673478	C5orf5	0.0268674	1.43122
ILMN_1718961	BNIP3L	0.0344234	1.43105
ILMN_1776109	ZNF622	0.000280271	1.43096
ILMN_1660629	NBEAL2	0.0133701	1.4309
ILMN_1749636	DNAJC22	0.0171957	1.43082
ILMN_1691731	PARP14	0.00235402	1.43068
ILMN_1738578	FILIP1L	0.0113597	1.43066
ILMN_1674874	MFSD10	0.000954863	1.43059
ILMN_1708164	EIF3A	0.0124938	1.43035
ILMN_1807514	ZNF394	0.000768493	1.42991
ILMN_1709237	EPHX2	0.00499487	1.42964
ILMN_1730084	COMT	0.00607203	1.42961
ILMN_1782004	BAPX1	0.0160781	1.42933
ILMN_1697682	RECQL5	0.0304773	1.42914
ILMN_1738675	PTPN6	0.0320026	1.42908
ILMN_1665909	LASP1	0.0181898	1.42783
ILMN_1705261	CAPN1	0.012475	1.42775
ILMN_1670379	ANTXR1	0.00908279	1.42745
ILMN_1797277	KIF3C	0.0028133	1.42704
ILMN_1778013	PDPR	0.00305949	1.42684
ILMN_1738237	HS1BP3	0.00335542	1.42677
ILMN_1693471	KLHL35	0.00866323	1.42659
ILMN_1768577	PCSK6	0.00050031	1.42658
ILMN_1813746	CORO2A	0.00276223	1.4262
ILMN_1795342	MLPH	0.0110128	1.42613
ILMN_1695370	LOC645968	0.00132424	1.42567
ILMN_1692956	LOC643949	0.0187837	1.42466
ILMN_1727617	XRN2	0.00793658	1.4241
ILMN_1775330	C15orf52	0.00153625	1.42402
ILMN_1675939	IFNGR1	0.000937545	1.42372
ILMN_1718646	MMP15	0.00291709	1.42332
ILMN_1767360	IL10RB	0.0244326	1.42303
ILMN_1660439	LOC651149	0.0444094	1.42293
ILMN_1683063	PDE9A	0.00205272	1.4221
ILMN_1715994	HGS	0.0385433	1.42193
ILMN_1662741	EDG4	0.000117794	1.42123
ILMN_1808860	STX5	0.00221452	1.42101
ILMN_1803889	LOC146439	0.0101349	1.4207
ILMN_1784523	ATP6V1G1	0.0169459	1.42048
ILMN_1795428	WDR59	0.00213286	1.42035
ILMN_1777663	TOP2B	0.00247798	1.41997
ILMN_1813423	NAT15	0.00309802	1.41971
ILMN_1810191	PLA2G4C	0.00125392	1.41963
ILMN_1708787	ZNF627	0.00485006	1.41937
ILMN_1693490	SEC11A	0.0340908	1.41917
ILMN_1807455	DHRS7	0.00925096	1.41908
ILMN_1701247	LOC132241	0.0036237	1.41905
ILMN_1801043	GSN	0.0340586	1.41872
ILMN_1714756	YIPF5	0.0130273	1.41825
ILMN_1797384	UROS	0.0184385	1.41822
ILMN_1677877	UBE2L3	0.0107636	1.41789
ILMN_1697006	LOC642361	0.00835743	1.41756
ILMN_1711073	LOC653489	0.0290965	1.41753
ILMN_1737993	ERBB3	0.0124017	1.41728
ILMN_1761068	MGC52000	0.00245133	1.41722
ILMN_1737715	OSR2	0.00626885	1.41706
ILMN_1797684	PDCD2	0.000407369	1.41699
ILMN_1715698	MGC71993	0.00749495	1.41678
ILMN_1802628	PPAPDC2	0.00331193	1.4166
ILMN_1747627	ABCA2	0.00249006	1.41648
ILMN_1694731	CLCN7	0.000754171	1.41647
ILMN_1718271	MTIF3	0.010587	1.4163
ILMN_1683065	C2orf64	0.0052489	1.41568
ILMN_1763433	TRIM9	0.00170922	1.41507
ILMN_1666819	PHLDB1	0.00439552	1.41502
ILMN_1657771	CRTC2	0.000768493	1.41498
ILMN_1815392	ACTRT1	0.0293296	1.41495
ILMN_1793290	WDR60	0.00143933	1.4143
ILMN_1655614	DSP	0.00980574	1.41419
ILMN_1720053	ZFAND3	0.032343	1.41347
ILMN_1703314	KLHL36	0.00688097	1.41319
ILMN_1743204	DUSP8	0.0155467	1.41318
ILMN_1722726	RICS	0.00792573	1.41294
ILMN_1805410	C15orf48	0.0288055	1.41267
ILMN_1752269	ACSS1	0.00254111	1.41262
ILMN_1790953	TBCB	0.0283386	1.41247
ILMN_1693664	POMGNT1	0.00316082	1.41241
ILMN_1721241	PSCD2	0.0086606	1.41233
ILMN_1791186	ARHGAP18	0.0109782	1.41204
ILMN_1758719	NEDD9	0.00228607	1.41078
ILMN_1667948	SPATA18	0.00479051	1.41078
ILMN_1721106	C14orf159	0.00320166	1.41067
ILMN_1777049	ZNF160	0.00329351	1.41022
ILMN_1793118	TAX1BP1	7.87094e-05	1.41014
ILMN_1667356	CCDC128	0.00285142	1.41005
ILMN_1713993	UBAC2	0.00949816	1.40967
ILMN_1743829	ATXN2	0.00276511	1.40884
ILMN_1669633	ACP1	0.00060945	1.40875
ILMN_1727479	TPRG1L	0.0103218	1.40866
ILMN_1751743	XRCC1	0.00422455	1.40846
ILMN_1903159		0.0168607	1.40818
ILMN_1660519	C3orf70	0.000770482	1.40781
ILMN_1764964	IFNGR2	0.0128536	1.40766
ILMN_1772706	C10orf32	0.025945	1.40763
ILMN_1669064	ZNF823	0.00460632	1.40691
ILMN_1762725	EIF3L	0.0289336	1.40651
ILMN_1701789	IFIT3	0.00176772	1.40644
ILMN_1742827	EXOC4	0.00511276	1.40619
ILMN_1723912	IFI44L	0.0200409	1.4059
ILMN_1738749	MAST3	0.00895816	1.40555
ILMN_1711699	LOC728014	0.0119903	1.40546
ILMN_1800626	SESN1	0.000217629	1.40511
ILMN_1772492	MCART1	0.0346196	1.40493
ILMN_1686135	CCDC45	0.00636813	1.40464
ILMN_1806010	CUL9	0.00707355	1.40461
ILMN_1750429	MKNK1	0.00131398	1.40446
ILMN_1772286	OCIAD2	0.00365879	1.40435
ILMN_1781373	IFIH1	0.0203122	1.40435
ILMN_1738866	DEXI	0.0068915	1.40426
ILMN_1736112	ARHGAP10	0.0143019	1.40426
ILMN_1677607	SC5DL	0.000410279	1.40418
ILMN_1815024	PRDX5	0.00420889	1.40414
ILMN_1671893	CHMP2A	0.0233279	1.40386
ILMN_1666976	PLD3	0.00531997	1.40349
ILMN_1728660	PMPCB	0.0104006	1.40314
ILMN_1800733	MANBA	0.000346384	1.40295
ILMN_1796339	PLEKHA2	0.000245437	1.40278
ILMN_1712678	RPS27L	0.0218565	1.40275
ILMN_1753890	TMEM97	0.00483904	1.40242
ILMN_1651788	MAP3K11	0.00174793	1.4017
ILMN_1712944	AES	0.0217514	1.40135
ILMN_1777660	RNF144	0.015024	1.40134
ILMN_1722532	JMJD1A	0.00963765	1.40117
ILMN_1687440	HIPK2	0.0287693	1.40113
ILMN_1689059	ZNF329	0.00370637	1.40108
ILMN_1674421	TM9SF4	0.00668278	1.40102
ILMN_1655740	SNAI2	0.000251041	1.40095
ILMN_1759772	LRRC56	0.019029	1.40093
ILMN_1693259	PDCD6IP	0.000683803	1.4008
ILMN_1761260	COBLL1	0.0129981	1.40074
ILMN_1787415	SNX16	0.0197566	1.4006
ILMN_1709486	SRPX	0.0123749	1.4003
ILMN_1730998	TSPAN6	0.00166215	1.39757
ILMN_1736562	TRIM39	0.0126581	1.39755
ILMN_1794643	ZGPAT	0.0087773	1.39739
ILMN_1667319	LPPR2	0.00366734	1.39633
ILMN_1793384	JAK1	0.0398029	1.39628
ILMN_1756139	LOC643310	0.00245713	1.3962
ILMN_1760027	WAS	0.000505112	1.3961
ILMN_1771233	CHMP4B	0.00023445	1.39588
ILMN_1720476	PHF2	0.00150464	1.39575
ILMN_1754130	TRIM52	0.00330774	1.39575
ILMN_1691290	CELSR3	0.00935858	1.39565
ILMN_1798790	IL17RC	0.00412519	1.39554
ILMN_1788062	SH3GL1	0.000458371	1.39553
ILMN_1705310	VEZF1	0.00235716	1.39544
ILMN_1663866	TGFBI	0.00371251	1.39534
ILMN_1753426	KIAA0556	0.00117736	1.39531
ILMN_1658830	C10orf26	0.00154366	1.39515
ILMN_1738955	C10orf104	0.00387275	1.39514
ILMN_1681679	TSPO	0.0116307	1.39488
ILMN_1755411	RBMS2	7.26279e-05	1.39475
ILMN_1740443	LOC728811	0.00475381	1.39432
ILMN_1722855	VEGFB	0.00820481	1.39386
ILMN_1661636	ZMYM2	0.00338468	1.3938
ILMN_1730734	TMEM205	0.00863369	1.39346
ILMN_1693311	TMBIM6	0.00330774	1.393
ILMN_1813893	DDX43	0.0141402	1.39298
ILMN_1776327	LOC727820	0.0332933	1.39286
ILMN_1697793	SYNJ2BP	0.00137961	1.3926
ILMN_1839750	LOC729776	0.00104266	1.39257
ILMN_1752967	DHPS	0.011097	1.39156
ILMN_1673363	CD97	0.00905534	1.39155
ILMN_1654060	MKNK2	0.000552899	1.39146
ILMN_1766054	ABCA1	0.00307912	1.39121
ILMN_1757237	DDEF2	0.0187673	1.39117
ILMN_1814787	ICA1	0.0317358	1.39103
ILMN_1806667	FRAS1	0.00270134	1.39083
ILMN_1699265	TNFRSF10B	0.00782009	1.39072
ILMN_1752199	LHPP	0.00350817	1.39025
ILMN_1721204	CSF2RA	0.0118425	1.38984
ILMN_1881514		0.00426044	1.38913
ILMN_1669177	DHRS12	0.00246704	1.38907
ILMN_1673275	TRAPPC2	0.0417524	1.38899
ILMN_1789909	TBC1D9B	0.000897188	1.38874
ILMN_1715635	ATP6V0E1	0.00651158	1.38849
ILMN_1745620	KRCC1	0.0217331	1.38846
ILMN_1734440	C14orf133	0.00679886	1.38795
ILMN_1732717	FAM71E1	0.0052489	1.3875
ILMN_1670807	FAM84B	0.0075293	1.38729
ILMN_1737833	ATN1	0.0178878	1.38672
ILMN_1657744	C15orf17	0.00151755	1.38659
ILMN_1677691	LOC648852	0.0144615	1.38647
ILMN_1789733	CLIP3	0.0105822	1.38641
ILMN_1665832	ID1	0.0320262	1.38614
ILMN_1742330	PLXNB1	0.0472816	1.38611
ILMN_1768510	MAN2B2	0.00762264	1.38606
ILMN_1682054	SRI	0.0163909	1.38565
ILMN_1705922	BAIAP2	0.0049278	1.3856
ILMN_1769637	RNMT	0.00174793	1.38543
ILMN_1685631	KIAA0892	0.000108613	1.38541
ILMN_1787718	SLC27A1	0.00197912	1.38536
ILMN_1653039	LOC642934	0.000597365	1.38528
ILMN_1686254	FAM127B	0.0157581	1.38462
ILMN_1724825	PCBP2	0.000190164	1.38457
ILMN_1850238		0.00243027	1.38453
ILMN_1728983	NR2C1	0.00482375	1.38443
ILMN_1709032	FYCO1	0.0126581	1.38436
ILMN_1730799	PHF12	0.00512181	1.38335
ILMN_1707137	C17orf97	0.0190169	1.38333
ILMN_1804415	SMAGP	0.00280555	1.38321
ILMN_1653828	CHFR	0.000559796	1.38315
ILMN_1779014	TSPYL1	0.0182744	1.38311
ILMN_1679641	FAM120B	0.00159715	1.38295
ILMN_1799062	NFKB2	0.000753866	1.3828
ILMN_1768534	BHLHB2	0.00071325	1.3824
ILMN_1748116	GEMIN8	0.00526626	1.38236
ILMN_1713759	UBE2J1	0.00499487	1.38197
ILMN_1727923	ZNF140	0.0191437	1.38097
ILMN_1690524	VAMP7	0.0244736	1.38078
ILMN_1765122	MAP3K2	0.000987189	1.38049
ILMN_1779034	NADSYN1	0.00185352	1.38047
ILMN_1772651	CNOT2	0.0112644	1.38012
ILMN_1695745	DISP1	0.00179871	1.38004
ILMN_1721741	ATPBD1B	0.0066069	1.38004
ILMN_1806017	PSME1	0.00856238	1.37964
ILMN_1774161	ARL15	0.00213786	1.37957
ILMN_1657554	TSPYL2	0.0447784	1.37956
ILMN_1699852	CES8	0.0117843	1.37948
ILMN_1763386	BID	0.0027495	1.37918
ILMN_1738704	TRIM26	0.0104173	1.37882
ILMN_1768282	SNX21	0.000247809	1.37872
ILMN_1807439	ALDH1A3	0.0123975	1.37804
ILMN_1691410	BAMBI	0.00216375	1.37794
ILMN_1807972	MICAL1	0.00749495	1.37779
ILMN_1784985	PRRT3	0.00398819	1.37717
ILMN_1772731	HAGH	0.00827949	1.37715
ILMN_1738707	S100A13	0.0040407	1.3771
ILMN_1679025	LOC641848	0.00176438	1.37664
ILMN_1721093	TAF10	0.00305229	1.37663
ILMN_1800078	LMO2	0.00250571	1.37656
ILMN_1712390	CUTA	0.0225915	1.37648
ILMN_1717234	CAST	0.00135038	1.37611
ILMN_1660864	RHBDL1	0.00474091	1.37523
ILMN_1657451	SRPK2	0.00142368	1.37403
ILMN_1711823	C17orf70	0.0151421	1.37378
ILMN_1713978	SDF2	0.00793658	1.37355
ILMN_1669592	2002-03-01	0.00786867	1.37283
ILMN_1772722	MRPS33	0.00221824	1.37278
ILMN_1813503	SEMA6C	0.016812	1.37264
ILMN_1713174	TCP11L1	0.00320962	1.37256
ILMN_1671661	HSD17B7	0.0121399	1.37252
ILMN_1690304	MGC26718	0.0273161	1.37161
ILMN_1713990	TRIP6	0.0091733	1.3716
ILMN_1796113	BCDIN3D	0.0033829	1.37131
ILMN_1806432	NT5C	0.00139959	1.37099
ILMN_1685095	CNO	0.0176594	1.37097
ILMN_1764091	R3HDM2	0.0068915	1.37096
ILMN_1659761	SNX29	0.0028283	1.37091
ILMN_1687896	PIK3C3	0.00905534	1.37068
ILMN_1785618	SMTN	0.0114117	1.37067
ILMN_1769135	DPP7	0.0103451	1.3705
ILMN_1708805	NCOA3	0.013479	1.3705
ILMN_1719664	PTPN21	0.00182264	1.36999
ILMN_1662161	TBC1D13	0.00389219	1.3698
ILMN_1793672	SIX5	0.0124261	1.36973
ILMN_1659054	CHKB	0.00579878	1.36942
ILMN_1727589	SULT2B1	0.0422457	1.36908
ILMN_1800031	C19orf15	0.0160588	1.36875
ILMN_1675848	MYL12A	0.00127819	1.36851
ILMN_1739335	LOC400948	0.00150652	1.36851
ILMN_1714397	CRYL1	0.00475782	1.3684
ILMN_1709265	RNF170	0.00531662	1.36834
ILMN_1760320	GNB1	0.00857273	1.36833
ILMN_1804652	PLEKHH3	0.00582018	1.36783
ILMN_1752665	ELMO3	0.00133296	1.36748
ILMN_1692895	PIK3R3	0.00811107	1.36747
ILMN_1802380	RERE	0.00366192	1.36746
ILMN_1663519	SLC24A3	0.0277379	1.3674
ILMN_1708167	CDCP1	0.00444513	1.36728
ILMN_1790455	BCAM	0.00469402	1.36675
ILMN_1751689	CHRM1	0.00285007	1.36666
ILMN_1698685	MATN2	0.000410279	1.36641
ILMN_1807031	C14orf28	0.00104279	1.36628
ILMN_1739847	EIF3D	0.00133432	1.36606
ILMN_1730082	RPUSD4	0.00216685	1.36586
ILMN_1761176	GRIPAP1	0.0476152	1.36585
ILMN_1772459	RPS23	0.00315502	1.36509
ILMN_1741055	NUP210L	0.00789184	1.36494
ILMN_1674135	RALGPS1	0.00316355	1.36479
ILMN_1678054	TRIM21	0.00389286	1.36479
ILMN_1782050	CEBPD	0.0186873	1.36457
ILMN_1671932	SAMM50	0.0107762	1.36434
ILMN_1677487	ANKZF1	0.0369392	1.36424
ILMN_1700518	HMGN4	0.000779277	1.36355
ILMN_1782412	IRX2	0.0030452	1.36324
ILMN_1775814	GHR	0.0167041	1.36324
ILMN_1760121	RRAGC	0.0128695	1.36313
ILMN_1710209	MFSD6	0.0311035	1.36312
ILMN_1777513	KCTD11	0.00890251	1.3629
ILMN_1791423	LOC401052	0.00276817	1.36281
ILMN_1732127	RBKS	0.0301831	1.36257
ILMN_1742382	RIMS3	0.00866535	1.36212
ILMN_1748911	SNAP23	0.000785165	1.36169
ILMN_1756469	GAMT	0.0099038	1.36168
ILMN_1808356	FAM3A	0.00936461	1.36159
ILMN_1808707	FSCN1	0.0037053	1.36093
ILMN_1674265	AVIL	0.00156539	1.35994
ILMN_1757847	C11orf68	0.00211369	1.35973
ILMN_1789094	NINL	0.00607203	1.35952
ILMN_1652280	FBXO32	0.0171065	1.35912
ILMN_1656676	ZYG11B	0.0452646	1.35902
ILMN_1658469	TP53AP1	0.00512241	1.35856
ILMN_1700109	PTOV1	0.00945843	1.35853
ILMN_1756352	MAPBPIP	0.0150224	1.35846
ILMN_1651719	MBTPS1	0.0196296	1.35842
ILMN_1777170	LOC440585	0.00916209	1.3581
ILMN_1693401	KLHL28	0.00393446	1.35787
ILMN_1680279	USP49	0.0435907	1.35766
ILMN_1718972	MFSD3	0.0411357	1.35761
ILMN_1737170	FLII	0.00359985	1.3575
ILMN_1653466	HES4	0.00365595	1.35748
ILMN_1788213	FRAT2	0.0019185	1.35744
ILMN_1700238	ZNF500	0.00641439	1.35714
ILMN_1889811		0.00376723	1.35711
ILMN_1810915	FAAH	0.000457078	1.3566
ILMN_1717877	IVNS1ABP	0.0290256	1.35634
ILMN_1739942	FAM117B	0.0219015	1.35616
ILMN_1802550	PCSK6	0.00388105	1.35613
ILMN_1743402	SIX4	0.00987258	1.35602
ILMN_1672947	CAST	0.000902228	1.35557
ILMN_1812105	PIP5K2B	0.0380012	1.35525
ILMN_1687279	DHPS	0.0081451	1.35521
ILMN_1670377	ZNF20	0.0116585	1.35503
ILMN_1766195	ZNF558	0.0401786	1.35458
ILMN_1788778	2011-09-01	0.0123749	1.35441
ILMN_1893511		0.0206712	1.35408
ILMN_1735415	NUDT16L1	0.0156955	1.35392
ILMN_1803743	LOC196752	0.00776964	1.35381
ILMN_1661778	MTL5	0.000937545	1.35378
ILMN_1741204	KLHDC2	0.0181909	1.35365
ILMN_1746618	PAQR7	0.00607203	1.35335
ILMN_1659365	LOC653071	0.0012933	1.3533
ILMN_1655821	CAPG	0.0290864	1.35324
ILMN_1811063	LOC649447	0.00703219	1.35255
ILMN_1782021	ZNF707	0.0340151	1.3525
ILMN_1700625	ATP5S	0.0100826	1.35244
ILMN_1787541	SPSB2	0.0105661	1.35222
ILMN_1671221	GAPVD1	0.000714596	1.35216
ILMN_1725946	IRF6	0.0103445	1.35211
ILMN_1715864	NHS	0.00557576	1.35134
ILMN_1783675	ASB8	0.00775994	1.35095
ILMN_1901934		0.0155226	1.35065
ILMN_1679949	SLC25A23	0.0207064	1.35052
ILMN_1665219	LTBP4	0.00282815	1.35049
ILMN_1676905	TIGD7	0.0202646	1.35009
ILMN_1755536	PFDN5	0.0117704	1.3499
ILMN_1701998	AFAP1	0.000342203	1.34966
ILMN_1680693	ZNF419	0.00176772	1.34927
ILMN_1655117	WDR19	0.0083034	1.34887
ILMN_1683576	MAGED2	0.0422672	1.34858
ILMN_1699772	RRAGD	0.001352	1.34848
ILMN_1782829	GLTSCR1	0.006021	1.34831
ILMN_1745374	IFI35	0.0125433	1.34831
ILMN_1669032	PPIC	0.0134099	1.34822
ILMN_1782851	TAPBP	0.017165	1.3479
ILMN_1709847	KCNJ13	0.00213475	1.34768
ILMN_1704385	LOC347376	0.000580239	1.34737
ILMN_1684306	S100A4	0.00688097	1.34695
ILMN_1802205	RHOB	0.00537653	1.34693
ILMN_1791067	TESK1	0.0124591	1.34676
ILMN_1691942	CCNI	0.00379375	1.34667
ILMN_1715715	CEBPA	0.0133437	1.34663
ILMN_1660079	RNF44	0.00730982	1.34651
ILMN_1816713		0.00426655	1.34636
ILMN_1772991	CHPF2	0.00752707	1.34609
ILMN_1734290	MAPRE3	0.0109036	1.34593
ILMN_1745116	ABHD12	0.00325423	1.34545
ILMN_1809583	CREBBP	0.0166676	1.34539
ILMN_1808731	LBX2	0.0303343	1.3447
ILMN_1731418	SP110	0.000732172	1.34441
ILMN_1679256	AP3B2	0.00150218	1.34434
ILMN_1716616	MARVELD3	0.0117467	1.34419
ILMN_1753608	TMEM131	0.000707131	1.34417
ILMN_1757914	C19orf56	0.0359242	1.34371
ILMN_1862521		0.0327533	1.34369
ILMN_1737255	C22orf36	0.0243023	1.34366
ILMN_1791375	STAG3L2	0.0413581	1.34339
ILMN_1709549	PLEKHM1	0.0209469	1.34299
ILMN_1783852	CD164	0.00799821	1.34212
ILMN_1652445	RAC1	0.0056748	1.34183
ILMN_1725312	RASA1	0.0402957	1.34161
ILMN_1691499	TJP1	0.00211369	1.34114
ILMN_1746241	SDHC	0.0127052	1.34087
ILMN_1720604	ARSG	0.0034474	1.34071
ILMN_1667162	NKX3-1	0.0150594	1.3407
ILMN_1757370	SMPD1	0.00550309	1.34021
ILMN_1747146	TSG101	0.00889946	1.34001
ILMN_1688452	LCMT1	0.00376987	1.33967
ILMN_1725862	USP3	0.0049205	1.33967
ILMN_1758337	ZNF213	0.0109469	1.3396
ILMN_1663313	AMY1C	0.0372161	1.33954
ILMN_1746696	PDS5B	0.0179447	1.33949
ILMN_1715476	LOC649970	0.00166427	1.33876
ILMN_1814165	SSBP3	0.0113322	1.33849
ILMN_1761540	SEMA3F	0.0387295	1.33847
ILMN_1740165	C14orf102	0.027831	1.33811
ILMN_1777477	C9orf106	0.00101536	1.33805
ILMN_1745223	CDC42EP4	0.0390427	1.33784
ILMN_1663685	DGCR6	0.00782009	1.33759
ILMN_1805992	KIAA1598	0.0137579	1.33724
ILMN_1745497	C12orf26	0.0070916	1.33678
ILMN_1700081	FST	0.02968	1.3365
ILMN_1791569	PLXNA1	0.00377158	1.33649
ILMN_1696127	KIAA0240	0.0199054	1.3362
ILMN_1713521	ZNF205	0.0178344	1.33613
ILMN_1774077	GBP2	0.00751225	1.3361
ILMN_1713301	DGCR2	0.0034265	1.33593
ILMN_1802519	VPS36	0.00166123	1.33588
ILMN_1675448	ZFP36L1	0.0138948	1.33584
ILMN_1676625	SS18L1	0.0171957	1.33557
ILMN_1658531	LOC653702	0.0159585	1.33535
ILMN_1812478	ZNHIT3	0.000615798	1.335
ILMN_1682775	EDN1	0.0017579	1.33489
ILMN_1676984	DDIT3	0.0112444	1.3348
ILMN_1745787	POLL	0.00334993	1.33467
ILMN_1809437	RHBDD2	0.0440471	1.33433
ILMN_1752027	UBE3B	0.011083	1.3342
ILMN_1779401	CHP	0.00650208	1.33414
ILMN_1748374	LOC400304	0.0110394	1.3336
ILMN_1679767	FLJ45983	0.038391	1.33349
ILMN_1695311	HLA-DMA	0.00836794	1.33339
ILMN_1669696	ZNF792	0.0023616	1.3332
ILMN_1676448	WDFY1	0.00770511	1.33297
ILMN_1790228	FURIN	0.000297814	1.33258
ILMN_1717639	SIK1	0.00071325	1.33238
ILMN_1696375	TTC31	0.00596153	1.33232
ILMN_1688702	PJA2	0.0265023	1.3322
ILMN_1707475	UBE2E2	0.00835743	1.33211
ILMN_1743427	SCYL3	0.00537653	1.33209
ILMN_1754865	LOC400455	0.0290965	1.33181
ILMN_1805448	EPB41L2	0.0253431	1.33164
ILMN_1700541	FBLN1	0.0323709	1.33124
ILMN_1651832	EHD1	0.00071396	1.33114
ILMN_1667030	HSBP1	0.00685877	1.33094
ILMN_1768449	PRPSAP1	0.00314003	1.33091
ILMN_1672660	MBP	0.000747639	1.33078
ILMN_1665982	AKTIP	0.000585064	1.33045
ILMN_1810584	IL1R1	0.00316355	1.33027
ILMN_1684628	ZFP90	0.0102758	1.33026
ILMN_1673798	PPOX	0.000293414	1.33014
ILMN_1679917	ARL16	0.00153235	1.32946
ILMN_1814799	S100A13	0.00353894	1.32937
ILMN_1693836	LOC653344	0.0330496	1.32898
ILMN_1785703	LMOD3	0.00531997	1.32892
ILMN_1688801	JPH3	0.0335215	1.3285
ILMN_1754179	AP1G2	0.0142713	1.32843
ILMN_1672661	SP110	0.0188472	1.32774
ILMN_1711729	LOC442454	0.0114599	1.32764
ILMN_1781001	SOCS3	0.00174787	1.3275
ILMN_1660900	SNORA7B	0.00790038	1.32735
ILMN_1659240	MTMR14	0.00527718	1.32733
ILMN_1815656	SERINC3	0.0241308	1.32713
ILMN_1693941	IGSF9	0.00378685	1.32689
ILMN_1772677	CNOT4	0.0143853	1.32686
ILMN_1735058	CHST12	0.0434252	1.32662
ILMN_1713249	PHF19	0.00926649	1.32644
ILMN_1757440	FAM69B	0.0379143	1.32636
ILMN_1805395	LTBP3	0.0112708	1.32621
ILMN_1696027	LOC642333	0.014004	1.32572
ILMN_1750401	C17orf62	0.0422708	1.32566
ILMN_1738523	MYD88	0.00211369	1.32486
ILMN_1694399	ICA1	0.0177305	1.32433
ILMN_1664776	EFR3A	0.0355583	1.32433
ILMN_1857335		0.0176694	1.32408
ILMN_1815578	ZNF223	0.0437524	1.32396
ILMN_1746085	IGFBP3	0.00681784	1.32376
ILMN_1680860	LEMD2	0.00476763	1.32364
ILMN_1701216	BANP	0.0340368	1.32345
ILMN_1810852	LAMC1	0.0232273	1.3231
ILMN_1677919	GMPR2	0.00931753	1.32298
ILMN_1788384	C9orf5	0.000611569	1.32251
ILMN_1758398	GUK1	0.0136302	1.32246
ILMN_1666564	LOC652489	0.0158073	1.32246
ILMN_1684964	ZNF212	0.0118791	1.32232
ILMN_1712112	RCAN1	0.00938356	1.32215
ILMN_1736901	ZDHHC23	0.00885414	1.3219
ILMN_1800889	FIG4	0.0141546	1.32185
ILMN_1664010	ELF1	0.00249504	1.3217
ILMN_1788540	LOC732075	0.013404	1.32152
ILMN_1749011	NECAP2	0.0151421	1.32149
ILMN_1707088	DENND2D	0.00570349	1.32127
ILMN_1776464	PARP4	0.034416	1.32115
ILMN_1701613	RARRES3	0.000795194	1.32113
ILMN_1705477	CAMK1D	0.00632289	1.32051
ILMN_1697827	ATP2A3	0.0421602	1.32049
ILMN_1675674	UBE4B	0.0129841	1.31997
ILMN_1703305	TWF2	0.0365133	1.31983
ILMN_1814808	BFAR	0.00558994	1.31953
ILMN_1663407	SURF1	0.00816616	1.31938
ILMN_1700660	RNF135	0.0203677	1.31933
ILMN_1666192	DCTN5	0.0293656	1.31933
ILMN_1652166	GUCY1B2	0.0157832	1.31924
ILMN_1748488	TXNL4B	0.0476582	1.31883
ILMN_1780987	RFXANK	0.027527	1.31868
ILMN_1731666	ZNF641	0.00759334	1.31865
ILMN_1733931	PDCD6	0.00232908	1.31852
ILMN_1731720	PDRG1	0.00526626	1.31848
ILMN_1671516	CIR1	0.0299956	1.31846
ILMN_1713006	CDC34	0.0035685	1.31842
ILMN_1685796	CSDE1	0.0194311	1.31835
ILMN_1676631	CCNO	0.0201952	1.3183
ILMN_1688295	ZNF219	0.0212796	1.31808
ILMN_1813846	P2RX4	0.0196015	1.31805
ILMN_1671686	EPB49	0.020396	1.31805
ILMN_1715482	ULK2	0.0390156	1.31801
ILMN_1682147	HOOK2	0.00197446	1.31798
ILMN_1678186	ATP6V0A4	0.00525387	1.31781
ILMN_1664738	C11orf54	0.00700563	1.31763
ILMN_1668228	LOC136143	0.000370111	1.31747
ILMN_1798620	PQLC1	0.00586338	1.31746
ILMN_1776094	PPCS	0.0316539	1.31729
ILMN_1722774	VPS72	0.0143163	1.31717
ILMN_1663454	PKP1	0.0197255	1.31715
ILMN_1682095	RCOR3	0.00395043	1.31701
ILMN_1750044	ZNHIT3	0.0242184	1.31659
ILMN_1742534	COL4A5	0.00358512	1.31649
ILMN_1712719	MAP7	0.0406483	1.31638
ILMN_1687743	BTBD7	0.013309	1.3162
ILMN_1715569	CCDC53	0.00133682	1.31601
ILMN_1706539	KDM3B	0.0011159	1.31547
ILMN_1688464	MAP6D1	0.00166123	1.31525
ILMN_1687303	ACAD10	0.00112654	1.31522
ILMN_1660232	PEX5	0.00899939	1.31507
ILMN_1765326	DGKD	0.0129219	1.31504
ILMN_1774334	HIGD2A	0.0270754	1.31462
ILMN_1783448	DYNC1LI2	0.0421499	1.31451
ILMN_1669456	NME3	0.0164441	1.31405
ILMN_1672094	DLX1	0.0300122	1.31337
ILMN_1704446	SLC6A10P	0.00156122	1.31312
ILMN_1674609	CLTB	0.00878639	1.31306
ILMN_1685140	PRRC1	0.013806	1.31288
ILMN_1744006	GFOD2	0.0210074	1.31285
ILMN_1749709	NDUFB11	0.0160995	1.31257
ILMN_1686968	ZNF362	0.0230001	1.31213
ILMN_1788942	GGT6	0.0131567	1.31211
ILMN_1665333	LOC645351	0.00398442	1.31194
ILMN_1769250	ARFGAP2	0.0104815	1.31188
ILMN_1807016	LHX2	0.0172335	1.3116
ILMN_1799765	RAB24	0.0360661	1.31157
ILMN_1759252	ADD1	0.000190421	1.31153
ILMN_1673138	ZBTB33	0.0298643	1.31119
ILMN_1698213	RBM3	0.00546206	1.31108
ILMN_1808202	C19orf22	0.00126894	1.31072
ILMN_1787186	NOV	0.00135037	1.31051
ILMN_1709948	LOC651453	0.00596157	1.31032
ILMN_1661293	ZNF224	0.00679406	1.31003
ILMN_1658472	APH1A	0.00878913	1.30988
ILMN_1716687	TPM1	0.0148799	1.30988
ILMN_1749738	NECAB3	0.010482	1.3098
ILMN_1664265	EPHA1	0.00384759	1.30928
ILMN_1730048	C7orf26	0.0112444	1.30925
ILMN_1661875	ANK3	0.00908039	1.30924
ILMN_1701918	KLHDC9	0.000784818	1.309
ILMN_1696839	RPS27	0.0374358	1.30897
ILMN_1664233	LOC644590	0.0219222	1.30857
ILMN_1781906	RBM17	0.0193068	1.30855
ILMN_1661833	ANKRD12	0.00572987	1.30847
ILMN_1741159	MAP3K8	0.0109728	1.30763
ILMN_1805998	C18orf21	0.0355595	1.30745
ILMN_1685580	CBLB	0.0395195	1.3069
ILMN_1656233	LOC389517	0.0244946	1.30672
ILMN_1792176	TADA3	0.0199689	1.30621
ILMN_1691432	PRDM4	0.0063803	1.30604
ILMN_1684554	COL16A1	0.0254815	1.30599
ILMN_1700204	ZMYND8	0.0340351	1.30598
ILMN_1712269	ZNF605	0.00607203	1.3056
ILMN_1653319	MC1R	0.0295441	1.30545
ILMN_1756542	TBC1D17	0.0315473	1.30533
ILMN_1743316	FAM109A	0.0418968	1.30518
ILMN_1814789	UBAP2L	0.0124636	1.30428
ILMN_1747395	SLC24A1	0.0222536	1.30415
ILMN_1711422	PLEKHN1	0.0405478	1.3041
ILMN_1768973	HIST2H2AC	0.021523	1.30386
ILMN_1738150	SUMO2	0.0187569	1.30371
ILMN_1674629	C9orf3	0.000505112	1.30368
ILMN_1654320	LOC644250	0.0173123	1.30333
ILMN_1686370	AGXT2L2	0.000505112	1.30322
ILMN_1689817	LCOR	0.00238078	1.30317
ILMN_1681845	PAPD4	0.0188536	1.30305
ILMN_1752935	TMEM30B	0.0027495	1.30297
ILMN_1704195	FUK	0.0183183	1.30281
ILMN_1763520	SULT2B1	0.0412355	1.30271
ILMN_1653220	PITPNM1	0.00908681	1.3027
ILMN_1664798	GRHPR	0.0126034	1.30266
ILMN_1812392	TMSB10	0.00277075	1.30263
ILMN_1772466	SH2D3A	0.0106617	1.30255
ILMN_1653432	HNRPDL	0.0201479	1.30255
ILMN_1705861	AP1M2	0.000954863	1.30217
ILMN_1695821	ACTR1B	0.00303025	1.30178
ILMN_1700001	TCTA	0.0159559	1.30159
ILMN_1738821	GOLGA2	0.0144401	1.30155
ILMN_1700633	ABHD4	0.0213433	1.30143
ILMN_1714384	PCCA	0.0033203	1.30046
ILMN_1740762	GRB7	0.00793658	1.30045
ILMN_1707199	WDR20	0.00186036	1.2998
ILMN_1741392	SLC25A20	0.00468238	1.29961
ILMN_1778173	AK3	0.00995504	1.29936
ILMN_1797530	CHCHD5	0.00116762	1.2993
ILMN_1793770	DNAJB6	0.000311685	1.29909
ILMN_1811301	INPP5E	0.0268484	1.29904
ILMN_1748884	TOB2	0.0151421	1.29879
ILMN_1754220	SF3A2	0.00291345	1.29852
ILMN_1772261	GLG1	0.00159826	1.29844
ILMN_1801101	ZBTB48	0.0333314	1.29832
ILMN_1769633	CTSO	0.00525387	1.29799
ILMN_1745697	MGRN1	0.0334117	1.29715
ILMN_1723846	FAM119B	0.0103804	1.29714
ILMN_1794968	LRRC28	0.0246258	1.2969
ILMN_1815086	NINJ1	0.0033203	1.29677
ILMN_1740900	BMP4	0.0257349	1.29666
ILMN_1756439	SCRN1	0.0445978	1.29655
ILMN_1681467	RAB11FIP4	0.0477285	1.29633
ILMN_1757781	SAP30L	0.00480856	1.29575
ILMN_1721134	TGM1	0.0293225	1.29566
ILMN_1708486	CNN2	0.033087	1.29558
ILMN_1784540	KBTBD2	0.0145596	1.29547
ILMN_1666597	PI4KB	0.00499487	1.29515
ILMN_1741564	DCTN4	0.00135038	1.29503
ILMN_1700182	LOC400721	0.0294002	1.29497
ILMN_1696675	CES2	0.00198169	1.29467
ILMN_1720857	GUSBL1	0.00636041	1.2945
ILMN_1764709	MAFB	0.0472241	1.29428
ILMN_1704972	TRIM5	0.00323379	1.29427
ILMN_1736008	YRDC	0.0112444	1.2934
ILMN_1762207	SGSM1	0.00563423	1.29252
ILMN_1773764	CECR7	0.0208224	1.29217
ILMN_1704284	LOC648164	0.0294143	1.29197
ILMN_1873112		0.0193068	1.29127
ILMN_1670028	LPIN2	0.00752966	1.29126
ILMN_1671911	MTA1	0.0357564	1.29112
ILMN_1738383	EEF2	0.0443751	1.29046
ILMN_1788421	KCNK15	0.00947396	1.29041
ILMN_1776088	NAT9	0.0256105	1.29038
ILMN_1709439	CHMP1A	0.0348517	1.29037
ILMN_1745329	PRR14	0.0130473	1.29017
ILMN_1786215	ZNF3	0.0070079	1.29009
ILMN_1753143	RHPN2	0.0082434	1.28998
ILMN_1726308	FAM10A4	0.00267068	1.28991
ILMN_1795429	VCL	0.00232681	1.28948
ILMN_1660727	ENPP5	0.0434493	1.28888
ILMN_1703335	LACTB	0.00316082	1.28847
ILMN_1802971	FAM160B2	0.0110491	1.28771
ILMN_1802456	DCTD	0.01498	1.28759
ILMN_1765523	TOLLIP	0.0388075	1.28747
ILMN_1914855		0.0346043	1.28738
ILMN_1769547	DIO1	0.00793658	1.28673
ILMN_1813635	KIAA1429	0.0306637	1.28672
ILMN_1679232	KIDINS220	0.00861201	1.28654
ILMN_1678353	FARP1	0.0333875	1.28649
ILMN_1903568		0.0123749	1.28603
ILMN_1651278	SNIP1	0.00744675	1.28526
ILMN_1685854	C5orf53	0.0235276	1.28521
ILMN_1786976	RAB22A	0.0104693	1.28514
ILMN_1705390	KLHL22	0.0309604	1.28496
ILMN_1693394	BCKDK	0.0336828	1.28493
ILMN_1787256	HCN3	0.0437717	1.28483
ILMN_1681304	PAN3	0.0236267	1.28468
ILMN_1715789	DOCK1	0.00878639	1.28454
ILMN_1701094	CLN8	0.00816606	1.28451
ILMN_1699610	CCT6B	0.0473023	1.28448
ILMN_1718063	LIPA	0.0169535	1.28443
ILMN_1744912	CTTN	0.0289737	1.28425
ILMN_1851540		0.00105669	1.28421
ILMN_1722218	MBOAT7	0.007948	1.28367
ILMN_1730678	ANKRD30B	0.0407649	1.28359
ILMN_1669931	TM9SF3	0.0346196	1.28298
ILMN_1712431	FAM113B	0.00984416	1.28295
ILMN_1708047	LOC648581	0.0123975	1.28272
ILMN_1701655	SLC24A6	0.0384441	1.28263
ILMN_1678705	FLJ35220	0.00442575	1.2825
ILMN_1770733	RIC8A	0.0471707	1.28249
ILMN_1890253		0.0471235	1.28242
ILMN_1693317	TTC15	0.0118993	1.28225
ILMN_1761566	C5orf32	0.0151873	1.2822
ILMN_1762003	SEC62	0.00709062	1.28213
ILMN_1762281	DCTN3	0.00625908	1.28191
ILMN_1670322	FCHO2	0.0161454	1.281
ILMN_1729691	SLC16A6	0.0337499	1.28096
ILMN_1660810	TTC17	0.0186575	1.28089
ILMN_1710052	CPT1A	0.00670624	1.28079
ILMN_1669352	LY6G6C	0.0499574	1.28077
ILMN_1678004	TMEM41B	0.00545478	1.28027
ILMN_1753712	STX10	0.026282	1.28005
ILMN_1778087	ANXA8	0.00457502	1.28
ILMN_1694111	PNKP	0.00697184	1.28
ILMN_1786021	PRKAB2	0.00904674	1.27971
ILMN_1761915	BRWD1	0.0130839	1.27936
ILMN_1753547	STAT5A	0.000386978	1.27931
ILMN_1797001	DDX58	0.00827943	1.27931
ILMN_1665437	CYP2E1	0.0188241	1.27921
ILMN_1664016	ARHGEF18	0.0302632	1.27905
ILMN_1815292	RPL7	0.0400019	1.279
ILMN_1712197	KCNMB3	0.0420217	1.27888
ILMN_1724897	C14orf93	0.00288332	1.27856
ILMN_1781672	GAB1	0.0210074	1.27829
ILMN_1754562	ARHGEF17	0.0256411	1.27806
ILMN_1716678	NPC2	0.00711431	1.27785
ILMN_1695290	FERMT2	0.000532226	1.27766
ILMN_1785785	NCOA1	0.0179019	1.27749
ILMN_1803423	ARHGEF6	0.011217	1.27745
ILMN_1773553	FLJ46906	0.0346196	1.27727
ILMN_1750178	LOC653450	0.012338	1.27688
ILMN_1697153	ZDHHC17	0.0217331	1.27684
ILMN_1796682	PARP3	0.00751917	1.27659
ILMN_1665696	EFNA4	0.00491963	1.27597
ILMN_1657361	CBX7	0.0482269	1.27573
ILMN_1817377		0.0214102	1.27567
ILMN_1700203	KIAA1984	0.0361737	1.27561
ILMN_1719316	TMED3	0.0403833	1.27518
ILMN_1670875	PPM1D	0.00275299	1.27493
ILMN_1761560	PHF13	0.0121251	1.27483
ILMN_1661173	TRIP4	0.0194311	1.27482
ILMN_1754795	FAT1	0.00676622	1.27453
ILMN_1759023	WFS1	0.0354837	1.27442
ILMN_1722634	NUCB1	0.0241576	1.27409
ILMN_1735402	WDR22	0.0179282	1.27404
ILMN_1859863		0.00800231	1.27401
ILMN_1755954	CPEB3	0.0429224	1.27386
ILMN_1758173	TMEM99	0.0243808	1.27364
ILMN_1658182	MEX3C	0.0230201	1.27353
ILMN_1764619	FLJ45244	0.00470214	1.27341
ILMN_1665510	ERRFI1	0.00667809	1.27315
ILMN_1800739	SPINT2	0.00589921	1.27311
ILMN_1749962	NCAM2	0.0121399	1.27311
ILMN_1811195	ZNF211	0.0250806	1.27294
ILMN_1756408	PARVA	0.0076514	1.27276
ILMN_1805645	TMTC2	0.000502996	1.27275
ILMN_1784287	TGFBR3	0.032966	1.2726
ILMN_1777479	CDYL2	0.0243174	1.27211
ILMN_1679428	CHIC2	0.0380369	1.27199
ILMN_1661683	THRA	0.00119897	1.27187
ILMN_1793017	DGKQ	0.0403925	1.27181
ILMN_1667970	LOC728825	0.0197471	1.27171
ILMN_1697962	NSMCE1	0.00458058	1.27147
ILMN_1743582	NUDT22	0.00290217	1.27143
ILMN_1665049	SPG11	0.020791	1.27135
ILMN_1662846	GPR160	0.0147575	1.27089
ILMN_1800465	LOC654042	0.00600373	1.27077
ILMN_1656042	KIAA0319L	0.0293656	1.27051
ILMN_1665877	RNF149	0.010911	1.27033
ILMN_1789405	C22orf25	0.0297086	1.27033
ILMN_1701457	FAHD1	0.000950184	1.27032
ILMN_1751598	SESN2	0.0119184	1.2699
ILMN_1688318	MGC72104	0.00297422	1.26984
ILMN_1760245	TMEM42	0.0163846	1.26955
ILMN_1680673	NT5DC1	0.0418968	1.26951
ILMN_1712916	MGC45800	0.015072	1.26946
ILMN_1785175	SWAP70	0.00497041	1.2694
ILMN_1719792	PHLDB2	0.0180097	1.26938
ILMN_1677432	SRGAP1	0.0233289	1.26923
ILMN_1765825	WDR23	0.00253235	1.26921
ILMN_1784113	NAT14	0.00747052	1.26898
ILMN_1689189	ZBTB3	0.0132065	1.26792
ILMN_1725130	FAM50A	0.0472816	1.26735
ILMN_1688180	ASPSCR1	0.00137965	1.26695
ILMN_1731851	OXA1L	0.0201372	1.26679
ILMN_1718771	CCDC24	0.0497589	1.26679
ILMN_1661594	C2orf42	0.02702	1.26672
ILMN_1688000	POLDIP3	0.00869964	1.26591
ILMN_1696276	ZNF653	0.00634826	1.26585
ILMN_1807894	SLC7A8	0.042906	1.26569
ILMN_1678268	VPS8	0.0293225	1.26555
ILMN_1707649	MPDZ	0.0146147	1.26517
ILMN_1762316	CPSF3L	0.0287787	1.26476
ILMN_1652602	C11orf35	0.0125887	1.26461
ILMN_1670158	FAM83A	0.00767323	1.26454
ILMN_1653501	SEMA3B	0.00404049	1.26444
ILMN_1777915	STX6	0.00815762	1.26436
ILMN_1797367	TSC1	0.0403713	1.26424
ILMN_1679600	ACOT8	0.0436212	1.26352
ILMN_1797025	LOC651380	0.0492846	1.26329
ILMN_1765636	FLJ22184	0.015044	1.26297
ILMN_1769118	2009-09-01	0.00416488	1.26294
ILMN_1884750		0.00152376	1.26282
ILMN_1802089	SYMPK	0.00542428	1.26261
ILMN_1788149	NEK11	0.010482	1.26226
ILMN_1671728	CARD14	0.00329989	1.26201
ILMN_1786843	KCTD13	0.0127879	1.26199
ILMN_1749410	PKP4	0.0288668	1.26195
ILMN_1656420	MGC3020	0.0392371	1.26182
ILMN_1846517		0.0255325	1.26123
ILMN_1743763	TJAP1	0.00987463	1.26116
ILMN_1678904	ENO3	0.0116307	1.26105
ILMN_1745256	CXXC5	0.000673926	1.26067
ILMN_1656621	CHMP2A	0.00631507	1.26047
ILMN_1801697	C19orf46	0.00578937	1.26037
ILMN_1771697	VRK3	0.0262621	1.26024
ILMN_1725700	MOV10	0.00842217	1.25999
ILMN_1812297	CYP26B1	0.0121399	1.25996
ILMN_1862217		0.0376515	1.25986
ILMN_1657095	STARD3	0.0140267	1.25984
ILMN_1670841	CPNE1	0.00658447	1.25968
ILMN_1669310	RHOT2	0.0272354	1.25965
ILMN_1730118	ZNF644	0.00298403	1.25941
ILMN_1714417	PSEN2	0.011217	1.25922
ILMN_1712959	DUSP2	0.0224162	1.25905
ILMN_1661194	CLDN14	0.0107687	1.25897
ILMN_1782618	C9orf16	0.0296575	1.25876
ILMN_1682402	SNORD46	0.0348517	1.25859
ILMN_1766425	REPS2	0.0166441	1.25832
ILMN_1807596	UBAP1	0.00340634	1.25824
ILMN_1813191	LOC653080	0.0144495	1.25788
ILMN_1750158	ACOX1	0.0175873	1.25787
ILMN_1801476	CDS1	0.00776964	1.25778
ILMN_1665372	FXYD3	0.0249589	1.25768
ILMN_1727183	ZNF763	0.000536988	1.25767
ILMN_1776993	COG2	0.0231431	1.25698
ILMN_1873300		0.0139821	1.25651
ILMN_1718182	THRA	0.0429639	1.25637
ILMN_1809522	NACC2	0.00127819	1.25635
ILMN_1665205	ZNF260	0.0142558	1.25632
ILMN_1736974	SOX12	0.0147248	1.25606
ILMN_1685097	ASCC1	0.00927669	1.25602
ILMN_1702526	C17orf48	0.0307772	1.25598
ILMN_1793616	RNF38	0.00675135	1.25578
ILMN_1708093	ARHGEF5	0.00835779	1.25576
ILMN_1806705	ASB6	0.00424015	1.25572
ILMN_1652525	FAM125B	0.00298673	1.2555
ILMN_1775853	MAGI1	0.00474091	1.25535
ILMN_1670000	DCAF6	0.00694965	1.25514
ILMN_1739008	ATG9A	0.0238328	1.25493
ILMN_1666178	TP53I13	0.0124541	1.25469
ILMN_1779040	INO80B	0.0140463	1.25468
ILMN_1652797	FAM174B	0.0257349	1.25461
ILMN_1697227	USP36	0.026418	1.25457
ILMN_1684210	NPAL3	0.000281179	1.25443
ILMN_1751243	OSBPL7	0.0360661	1.25386
[truncated: 3,012 more rows]

## Sheet: ED vs C (CLINICAL PROBES=2274)
Illumina Probe ID	Gene Symbol	Corrected p-value (Post- vs. Pre-Anastrozole)	Fold-Change (Post- vs. Pre-Anastrozole)
ILMN_1712046	CPXM1	4.9182e-06	1.62708
ILMN_1812461	WISP2	8.7535e-05	1.61658
ILMN_1657409	LOC651278	9.24349e-07	1.59245
ILMN_1718182	THRA	6.93431e-07	1.57767
ILMN_1708107	DPT	0.000160229	1.53932
ILMN_1766914	MFAP4	6.01135e-05	1.47036
ILMN_1810172	SFRP4	0.00137511	1.46834
ILMN_1765557	OLFML2B	8.57653e-05	1.44204
ILMN_1672536	FBLN1	6.67196e-07	1.43501
ILMN_1738116	TMEM119	4.9917e-06	1.43222
ILMN_1763891	FLJ35258	0.000411468	1.40398
ILMN_1777644	PIB5PA	3.20567e-06	1.40289
ILMN_1689088	COLEC12	2.96717e-05	1.40286
ILMN_1770800	PODN	1.25163e-05	1.39992
ILMN_1684554	COL16A1	3.70442e-05	1.39935
ILMN_1676563	HTRA1	1.07121e-06	1.39836
ILMN_1664464	PTGDS	1.14788e-05	1.39772
ILMN_1723847	CILP	0.00592975	1.38003
ILMN_1734653	FNDC1	0.00763752	1.37301
ILMN_1763852	ACACB	1.26179e-06	1.37093
ILMN_1673639	ABI3BP	0.000997621	1.37075
ILMN_1680339	PDGFRL	0.000160576	1.36334
ILMN_1701308	COL1A1	0.00190012	1.36185
ILMN_1758895	CTSK	7.66219e-05	1.35748
ILMN_1791447	CXCL12	0.000659827	1.35724
ILMN_1744487	C1QTNF5	2.73801e-05	1.34816
ILMN_1671149	MEG3	0.000498541	1.34166
ILMN_1781626	C1S	7.14809e-05	1.33853
ILMN_1652826	LRRC17	0.000519359	1.33655
ILMN_1789007	APOC1	0.00687985	1.33197
ILMN_1740609	CCL14	0.000601699	1.32982
ILMN_1695311	HLA-DMA	0.000140226	1.32894
ILMN_1776151	OLFML1	5.50905e-06	1.32847
ILMN_1708041	PLEKHF1	8.27514e-08	1.32224
ILMN_1707070	PCOLCE	0.000916755	1.32155
ILMN_1684795	PRND	0.00171089	1.32152
ILMN_1722898	SFRP2	0.00272933	1.31491
ILMN_1687652	TGFB3	4.88611e-06	1.30845
ILMN_1733998	DHRS9	0.0084026	1.30755
ILMN_1723684	DARC	0.0379296	1.30689
ILMN_1726210	GPIHBP1	0.000135327	1.30429
ILMN_1745963	FOLR2	0.00206428	1.30297
ILMN_1811779	MGC24103	0.00822768	1.30273
ILMN_1721283	HSPB6	0.000215234	1.2993
ILMN_1787265	ZNF503	0.000226409	1.29845
ILMN_1682332	GYPC	0.000173209	1.29741
ILMN_1767556	C10orf10	0.0129631	1.29447
ILMN_1772612	ANGPTL2	0.00189617	1.29361
ILMN_1728197	CLDN5	0.00235573	1.29279
ILMN_1718565	CDKN1C	5.83913e-07	1.29176
ILMN_1729288	C1QTNF6	0.00142167	1.29108
ILMN_1670305	SERPING1	0.000131237	1.28938
ILMN_1747593	ISLR	0.00358772	1.2878
ILMN_1753101	VTCN1	0.0361094	1.28626
ILMN_1754660	C10orf56	9.67385e-06	1.28605
ILMN_1787981	MFAP2	0.00248949	1.28369
ILMN_1685122	COL9A2	7.96295e-05	1.2821
ILMN_1697420	TINF2	1.06451e-07	1.2813
ILMN_1700541	FBLN1	0.00776389	1.28113
ILMN_1711439	EMILIN1	0.00934944	1.28112
ILMN_1773079	COL3A1	0.000997621	1.28107
ILMN_1773389	PLTP	0.00265012	1.28098
ILMN_1878029		6.05834e-07	1.28078
ILMN_1760087	SLC26A3	0.00158524	1.28042
ILMN_1900263		0.00446376	1.2797
ILMN_1728898	LOC646424	0.00718327	1.27916
ILMN_1715748	FLNC	0.0123734	1.27727
ILMN_1668345	OAF	7.26257e-05	1.27715
ILMN_1796180	CRY2	2.34459e-07	1.27573
ILMN_1669772	LRP1	0.00219382	1.27512
ILMN_1690846	LOC642412	6.58392e-05	1.27338
ILMN_1657111	C14orf78	0.00752732	1.26792
ILMN_1790859	PLAC9	0.00555609	1.26695
ILMN_1726666	GPX3	0.0460771	1.26686
ILMN_1691747	KHDRBS3	9.69417e-06	1.26651
ILMN_1668039	GYPC	0.000504827	1.26644
ILMN_1741356	PRICKLE1	0.00211518	1.26604
ILMN_1791147	YPEL3	0.000113936	1.26462
ILMN_1752478	DHRS3	1.06058e-05	1.26399
ILMN_1769433	IQGAP2	4.88611e-06	1.26096
ILMN_1764228	DAB2	0.000860133	1.26051
ILMN_1653203	EFEMP2	0.000599406	1.2604
ILMN_1741632	RAB3IL1	0.000785219	1.25963
ILMN_1701603	ALPL	0.0139562	1.25947
ILMN_1706511	TEF	2.69347e-06	1.25921
ILMN_1704985	CYP27A1	0.00788868	1.25812
ILMN_1801307	TNFSF10	0.00197272	1.25801
ILMN_1784749	GAS6	0.00299313	1.25798
ILMN_1779558	GAS6	0.00275953	1.25709
ILMN_1726589	CD248	0.010589	1.25649
ILMN_1669831	C6orf192	0.00179983	1.25613
ILMN_1657803	CFH	0.000366725	1.25603
ILMN_1655611	ZNF218	0.000335934	1.25594
ILMN_1740938	APOE	0.00516733	1.25502
ILMN_1690170	CRABP2	0.000723188	1.25067
ILMN_1719986	PIK3IP1	8.77969e-07	1.24959
ILMN_1662587	PNPLA7	0.00014678	1.24948
ILMN_1779875	THY1	0.00923535	1.24908
ILMN_1676256	TPSAB1	0.0184628	1.24779
ILMN_1758672	FAM107B	0.000242594	1.2474
ILMN_1750563	CERCAM	0.00348131	1.24711
ILMN_1811313	SLIT3	0.00761556	1.24508
ILMN_1738075	CMIP	0.000154228	1.24439
ILMN_1777660	RNF144	0.000400162	1.24347
ILMN_1791890	SPON1	0.0328865	1.24285
ILMN_1736178	AEBP1	0.0138686	1.24214
ILMN_1733415	MFAP5	0.0288785	1.24214
ILMN_1732151	COL6A1	0.0194229	1.24033
ILMN_1699931	HCST	0.0166322	1.2403
ILMN_1803213	MXRA5	0.00552544	1.23994
ILMN_1661466	LOC651976	0.017696	1.23854
ILMN_1654398	RGL1	0.0046994	1.23746
ILMN_1801205	GPNMB	0.034715	1.23734
ILMN_1672417	PTPRCAP	0.0212638	1.23731
ILMN_1674817	C1orf115	0.000183671	1.23649
ILMN_1783909	COL6A2	0.0257892	1.23559
ILMN_1677505	CCL21	0.0427082	1.2351
ILMN_1792473	AIF1	0.00555609	1.23031
ILMN_1803825	CXCL12	0.00327865	1.23018
ILMN_1814194	TCF4	0.00131624	1.23002
ILMN_1738552	SLC1A3	0.00960113	1.22956
ILMN_1687501	MOXD1	0.00620046	1.22725
ILMN_1752728	FUCA1	9.62082e-05	1.22705
ILMN_1741688	CPXM2	0.00618566	1.22669
ILMN_1769615	FLRT2	8.51081e-06	1.22579
ILMN_1776519	RAP1GAP	0.00661275	1.22473
ILMN_1722855	VEGFB	0.00372478	1.22393
ILMN_1791511	TMEM176A	0.00525047	1.22386
ILMN_1694325	NFIX	0.00140561	1.22289
ILMN_1809850	RCN3	0.025983	1.22276
ILMN_1714861	CD68	0.0131207	1.22191
ILMN_1813104	GALNTL2	0.000240559	1.22118
ILMN_1778991	NFIB	0.000545085	1.22112
ILMN_1764709	MAFB	0.00686789	1.2202
ILMN_1767934	PCSK5	0.00271075	1.21804
ILMN_1740572	TCN2	6.25959e-05	1.21794
ILMN_1805842	FHL1	0.0185943	1.21673
ILMN_1715555	DBP	3.71107e-07	1.21667
ILMN_1690703	C21orf34	0.0007306	1.21621
ILMN_1775486	SSPN	0.000840915	1.21567
ILMN_1790689	CRISPLD2	0.0278929	1.2152
ILMN_1795300	FLJ41603	0.000263244	1.21461
ILMN_1667295	SLITL2	0.000131237	1.21457
ILMN_1730816	GPR162	0.00286224	1.2144
ILMN_1789505	ITPR1	0.0228987	1.21357
ILMN_1796423	CLIC3	0.0044213	1.21347
ILMN_1770338	TM4SF1	0.0025326	1.21266
ILMN_1727402	HCLS1	0.00212691	1.21054
ILMN_1671295	CCDC3	0.00968541	1.20979
ILMN_1791123	TMPRSS2	0.000460789	1.20953
ILMN_1709717	LRRC15	0.0323086	1.20944
ILMN_1749070	HLA-DPB1	0.000314992	1.20894
ILMN_1797822	KIAA0746	0.00750306	1.20889
ILMN_1808777	EHD2	0.00577195	1.20879
ILMN_1670490	PDPN	0.0201509	1.20813
ILMN_1706531	ABCC5	0.000661228	1.20558
ILMN_1812926	ANTXR2	0.00107887	1.20447
ILMN_1712305	CYBRD1	0.0339308	1.20401
ILMN_1748473	GIMAP4	0.00300438	1.20292
ILMN_1686906	TP53INP2	2.5745e-05	1.2024
ILMN_1651826	BASP1	0.0117453	1.20237
ILMN_1795835	LOC338758	0.00419967	1.20235
ILMN_1799600	STARD8	0.0109405	1.20163
ILMN_1762106	MMP2	0.000302826	1.20155
ILMN_1667361	COPZ2	0.00555337	1.20124
ILMN_1760027	WAS	0.0141814	1.20095
ILMN_1676897	HSPA12B	0.00301107	1.20073
ILMN_1684357	C14orf139	1.43878e-05	1.20072
ILMN_1773059	GPR124	0.00379102	1.19987
ILMN_1761733	HLA-DMB	0.00892831	1.19984
ILMN_1789639	FMOD	0.00758796	1.19967
ILMN_1796409	C1QB	0.0107082	1.19904
ILMN_1682176	CLEC3B	0.00430554	1.19903
ILMN_1792323	HDC	0.026638	1.19901
ILMN_1774602	FBLN2	0.043049	1.19827
ILMN_1758128	CYGB	0.00179983	1.19818
ILMN_1674050	COL8A2	0.0358735	1.1973
ILMN_1807359	CLEC11A	0.0141731	1.19635
ILMN_1664294	LEPRE1	0.00913318	1.19609
ILMN_1743367	FZD4	0.00162125	1.19481
ILMN_1807825	LY86	0.00746859	1.19475
ILMN_1730117	TMC5	0.0115026	1.19331
ILMN_1796734	SPARC	0.0287372	1.19265
ILMN_1778924	PDE1A	0.00194208	1.19244
ILMN_1750400	FLJ11286	0.0108599	1.19235
ILMN_1760509	EOMES	0.0466602	1.19093
ILMN_1701643	GDPD5	0.0013432	1.19091
ILMN_1709348	ALDH1A1	0.042515	1.19088
ILMN_1712684	FAM20C	0.0255322	1.1908
ILMN_1865764		0.000630237	1.19037
ILMN_1651429	SELM	0.00159716	1.19022
ILMN_1664912	IL11RA	0.013975	1.18987
ILMN_1789830	CFLAR	0.0100108	1.18968
ILMN_1689968	PLEKHO2	0.0338849	1.1893
ILMN_1667692	PTGIS	0.0382295	1.18917
ILMN_1677200	CYFIP2	0.0178651	1.18865
ILMN_1652631	GLIPR2	0.033153	1.18792
ILMN_1790052	MMP23A	0.00594543	1.18683
ILMN_1737025	PLCL2	0.00265806	1.18618
ILMN_1718607	TSPAN4	0.000617325	1.1861
ILMN_1753547	STAT5A	0.00206989	1.18593
ILMN_1726245	TGFBR2	0.00601048	1.18569
ILMN_1675656	PPFIBP2	0.00138921	1.18465
ILMN_1693242	ZNF296	0.00794859	1.18444
ILMN_1706643	COL6A3	0.00368432	1.18418
ILMN_1749792	SORBS1	0.016239	1.1836
ILMN_1679826	CST7	0.0126412	1.18358
ILMN_1736112	ARHGAP10	0.00152015	1.18352
ILMN_1686623	CSF1R	0.0294862	1.18274
ILMN_1660364	PSCD4	0.0228987	1.18237
ILMN_1745994	GAS7	0.00883021	1.18223
ILMN_1764788	TNFRSF1B	0.0443073	1.18208
ILMN_1776678	GIMAP7	0.0405522	1.18195
ILMN_1743219	CA11	0.000560923	1.18194
ILMN_1688228	LOC145837	0.00543959	1.18186
ILMN_1780057	RENBP	0.0438437	1.1817
ILMN_1659075	HLA-DOA	0.00129614	1.18143
ILMN_1695354	BMF	2.30625e-06	1.18139
ILMN_1815057	PDGFRB	0.00461651	1.18128
ILMN_1671928	PROS1	0.019659	1.18127
ILMN_1715662	CCDC80	0.00218739	1.18124
ILMN_1670535	NDRG2	0.000881313	1.18084
ILMN_1912417		0.00690204	1.1803
ILMN_1685441	ASAP3	0.00120196	1.18009
ILMN_1752755	VWF	0.0112369	1.17981
ILMN_1666976	PLD3	0.0025326	1.17979
ILMN_1789733	CLIP3	0.00211518	1.17949
ILMN_1766054	ABCA1	0.0103994	1.17936
ILMN_1751851	CECR1	0.0496219	1.17899
ILMN_1864685		0.00149776	1.17887
ILMN_1751326	C6orf189	0.000116349	1.17859
ILMN_1705442	CMTM3	0.00309927	1.17852
ILMN_1736093	SNX33	4.10137e-05	1.17836
ILMN_1679809	GSTP1	0.00712971	1.17834
ILMN_1736567	CD74	0.00885257	1.17812
ILMN_1661266	HLA-DQB1	0.0149261	1.17786
ILMN_1700248	WDR86	0.00223123	1.17716
ILMN_1655821	CAPG	0.0299065	1.17709
ILMN_1809483	HSD17B14	1.21758e-07	1.17641
ILMN_1674160	BIN1	0.0397881	1.17634
ILMN_1676062	DIP2C	0.000889716	1.17562
ILMN_1736863	FLJ11000	0.00187534	1.17531
ILMN_1796629	EDNRA	0.0448562	1.17446
ILMN_1740441	CYB5R3	0.0101028	1.1742
ILMN_1795089	FLJ21438	0.0395554	1.17412
ILMN_1768282	SNX21	6.48787e-06	1.17371
ILMN_1716246	FRZB	0.039463	1.17335
ILMN_1807972	MICAL1	0.0318782	1.17328
ILMN_1700183	AGTRL1	0.00946393	1.17312
ILMN_1768925	C1QTNF3	0.0132508	1.17291
ILMN_1805200	DNM1	0.0141852	1.17276
ILMN_1807969	SNCAIP	0.00806198	1.17254
ILMN_1750805	ARHGAP30	0.00838242	1.17253
ILMN_1770084	TACC1	0.000989163	1.17239
ILMN_1749846	OMD	0.0133488	1.17137
ILMN_1712475	HS3ST2	0.00822768	1.1713
ILMN_1761199	SLCO2B1	0.00960328	1.17118
ILMN_1706015	FAM43A	0.0103624	1.17093
ILMN_1727532	OLFML3	0.0259496	1.17086
ILMN_1791211	DOK2	0.017526	1.1708
ILMN_1697448	TXNIP	0.0067444	1.17065
ILMN_1800412	BMP1	0.0323086	1.17041
ILMN_1666206	GSDML	0.012377	1.16998
ILMN_1743797	LOC652102	0.0259496	1.16974
ILMN_1758146	PTPNS1	0.0160338	1.16958
ILMN_1731233	GZMH	0.0145828	1.16941
ILMN_1737163	SH3BGRL3	0.0170608	1.16933
ILMN_1800225	PPARG	0.0444575	1.1693
ILMN_1913060		0.0102514	1.16924
ILMN_1752269	ACSS1	0.00260801	1.16918
ILMN_1671731	AVPI1	0.000409091	1.16865
ILMN_1711617	GMFG	0.0465659	1.16762
ILMN_1770290	CNN2	0.0187854	1.16745
ILMN_1810559	RHOQ	0.00675306	1.16731
ILMN_1772261	GLG1	0.000236026	1.16665
ILMN_1695590	ADRB2	0.00133604	1.16665
ILMN_1798790	IL17RC	0.0224102	1.16653
ILMN_1772644	EML3	0.00421644	1.16643
ILMN_1665331	AMT	0.00756761	1.16636
ILMN_1808379	PLCD4	9.96044e-05	1.16633
ILMN_1731745	NINJ2	0.0240705	1.1657
ILMN_1680344	MYOM1	0.004088	1.16564
ILMN_1845086		0.0053537	1.16551
ILMN_1810782	SH3KBP1	0.00301107	1.16544
ILMN_1717261	HLA-DRB3	0.0294357	1.16529
ILMN_1694980	NAGLU	0.00117044	1.16499
ILMN_1764723	SH3PXD2B	0.00578244	1.16476
ILMN_1657760	SYT17	0.00388434	1.16431
ILMN_1736184	GSTM3	0.00768997	1.16421
ILMN_1700690	VAT1	0.00507642	1.16356
ILMN_1701731	AKR1B1	0.00819627	1.16309
ILMN_1655876	TMEM159	3.8886e-05	1.16308
ILMN_1760493	LIMS2	0.0104261	1.16266
ILMN_1739605	LYPD3	0.0263782	1.16248
ILMN_1677574	GALNT6	0.0403044	1.16217
ILMN_1800697	LDB2	0.00300438	1.16176
ILMN_1719826	LOC441956	0.00788548	1.16099
ILMN_1765258	HLA-E	0.0111326	1.16039
ILMN_1652512	C21orf25	0.00369459	1.16038
ILMN_1706960	KIAA1217	0.00933337	1.16026
ILMN_1669033	NCOA1	0.000132725	1.16025
ILMN_1720941	EVC	0.00513382	1.16012
ILMN_1696643	TLN1	0.00161356	1.15958
ILMN_1701875	ZYX	0.0102467	1.15938
ILMN_1693650	FES	0.00206989	1.15876
ILMN_1705302	FCGRT	0.00752594	1.15849
ILMN_1654262	ZMAT3	0.0452544	1.15848
ILMN_1760314	CCDC8	0.00106182	1.15814
ILMN_1658639	LOC283537	0.000174182	1.15802
ILMN_1792363	KLK4	0.0250604	1.15798
ILMN_1652246	KIAA0363	0.00836068	1.15791
ILMN_1762972	CHD9	0.00946393	1.15674
ILMN_1769575	JAM3	0.0311994	1.15668
ILMN_1678170	MME	0.00754605	1.15656
ILMN_1699631	GATS	0.00608524	1.15592
ILMN_1727284	CD4	0.0108269	1.15578
ILMN_1745620	KRCC1	0.0125228	1.15549
ILMN_1809467	VAMP5	0.00320878	1.15504
ILMN_1808299	IQSEC1	9.12183e-06	1.15483
ILMN_1658709	LAMB1	0.028048	1.15463
ILMN_1719498	ABHD7	0.00427265	1.15459
ILMN_1688848	TMEM44	0.027299	1.15444
ILMN_1779071	FEZ1	0.00570331	1.1543
ILMN_1658356	DKFZP586H2123	0.031695	1.15427
ILMN_1690034	SOD3	0.0113623	1.15413
ILMN_1665219	LTBP4	0.0142941	1.15377
ILMN_1681846	ZNF540	1.2227e-05	1.15359
ILMN_1672908	TWIST1	0.00764953	1.15344
ILMN_1776602	RNASE4	0.0191417	1.15249
ILMN_1746883	SAT2	5.47057e-06	1.15237
ILMN_1795166	PTHR1	0.0294202	1.15195
ILMN_1734290	MAPRE3	0.0104388	1.1518
ILMN_1684401	FMO1	0.00752584	1.15179
ILMN_1658494	RGC32	0.00861886	1.15173
ILMN_1762093	ABCC12	0.0358903	1.15161
ILMN_1653200	SLC22A17	0.0401422	1.15095
ILMN_1757877	HCFC1R1	0.00851532	1.15093
ILMN_1778173	AK3	0.00498215	1.15069
ILMN_1717636	RGMA	0.0044874	1.15066
ILMN_1744912	CTTN	0.00223459	1.15062
ILMN_1681437	DCXR	0.0473282	1.15024
ILMN_1656837	RBP1	0.0358387	1.1501
ILMN_1810584	IL1R1	0.00227472	1.15003
ILMN_1654319	HAPLN3	0.00451574	1.14995
ILMN_1684468	CILP2	0.00815847	1.14994
ILMN_1787718	SLC27A1	0.00102148	1.14979
ILMN_1685714	INHBB	0.019465	1.1494
ILMN_1773814	MUSTN1	0.00141766	1.14922
ILMN_1776157	2004-09-01	0.0213829	1.14916
ILMN_1746618	PAQR7	0.00283267	1.1491
ILMN_1778977	TYROBP	0.0410123	1.149
ILMN_1807894	SLC7A8	0.0169549	1.1489
ILMN_1665449	ROBO4	0.00404559	1.14881
ILMN_1681526	SLC5A1	0.01258	1.1488
ILMN_1814315	PBXIP1	0.0121063	1.14853
ILMN_1707232	EBF3	0.00250888	1.1482
ILMN_1805448	EPB41L2	0.000576324	1.14815
ILMN_1795104	ACADS	0.00934429	1.148
ILMN_1743103	SH3PXD2A	0.0391965	1.14782
ILMN_1707475	UBE2E2	0.0167053	1.14767
ILMN_1728163	CTDSP1	1.73006e-05	1.14753
ILMN_1739582	HOXA9	0.0369086	1.14739
ILMN_1710740	C2	0.0350535	1.14721
ILMN_1687316	NCDN	0.00301107	1.14669
ILMN_1774901	GDPD3	0.0270955	1.14656
ILMN_1849186		0.00452386	1.14652
ILMN_1738816	FOXO1A	0.0125406	1.14652
ILMN_1760305	KIAA1545	0.000580831	1.14639
ILMN_1778681	EBF1	0.0171885	1.14634
ILMN_1701877	AXL	0.0439631	1.14626
ILMN_1765801	GAA	0.0153566	1.14622
ILMN_1743032	CTSS	0.0102132	1.14607
ILMN_1812618	CENTD3	0.0283881	1.14604
ILMN_1702501	RPS6KA2	0.00939728	1.14598
ILMN_1766657	STOM	0.00746859	1.14574
ILMN_1752843	GRM4	0.0102868	1.14568
ILMN_1808707	FSCN1	0.0349239	1.14567
ILMN_1672547	MYO9B	0.0141731	1.14551
ILMN_1727574	LOC152485	0.0148802	1.1455
ILMN_1757338	PLSCR4	0.00821905	1.14528
ILMN_1709549	PLEKHM1	8.56365e-06	1.145
ILMN_1752451	CTSH	0.00116684	1.14499
ILMN_1742544	MEF2C	0.00279018	1.14465
ILMN_1727098	PPP1R16B	0.0229285	1.14449
ILMN_1677038	FLJ21986	0.042718	1.14442
ILMN_1689160	DPEP2	0.029582	1.1443
ILMN_1743445	FAM107A	0.00349529	1.14421
ILMN_1789596	ETV6	0.000250128	1.14414
ILMN_1751227	LOC401321	0.00934429	1.14404
ILMN_1719286	PPGB	0.0190332	1.14324
ILMN_1757085	NUMA1	0.027348	1.14312
ILMN_1683700	TNFSF12	0.000751587	1.14307
ILMN_1785330	SH3BP4	0.0405186	1.14304
ILMN_1794612	UBA7	0.00631075	1.14294
ILMN_1690566	RASSF4	0.0489472	1.14267
ILMN_1810729	UBL3	0.00311536	1.14256
ILMN_1694426	ROR2	0.00752584	1.14256
ILMN_1802923	APOC2	0.046392	1.14246
ILMN_1679797	ADARB1	0.0420126	1.1424
ILMN_1679929	KLF13	0.0142977	1.14222
ILMN_1745079	TRIM2	0.00601048	1.14158
ILMN_1728885	KIAA1644	0.00733034	1.14154
ILMN_1786197	NR2F1	0.0256248	1.14139
ILMN_1773470	ST5	0.0478205	1.14125
ILMN_1721344	MOBKL2A	0.0247109	1.14112
ILMN_1706969	C6orf65	0.00266655	1.141
ILMN_1667356	CCDC128	0.00471416	1.14098
ILMN_1657475	GALT	0.00292665	1.1409
ILMN_1764383	MCOLN1	0.00995534	1.1408
ILMN_1761068	MGC52000	0.0461126	1.14056
ILMN_1779015	ZNF467	0.0214693	1.14055
ILMN_1761912	MGAT1	0.0183548	1.1405
ILMN_1719236	CDH5	0.0114537	1.14033
ILMN_1798270	C11orf75	0.0158184	1.14016
ILMN_1756542	TBC1D17	0.0256113	1.14003
ILMN_1686555	FYN	0.00366563	1.13996
ILMN_1700681	CD99L2	0.025983	1.13946
ILMN_1683148	PRICKLE2	0.00160719	1.13939
ILMN_1719811	REM1	0.000489358	1.13926
ILMN_1907042		0.0448149	1.139
ILMN_1792571	ARHGEF15	0.0440564	1.13895
ILMN_1733675	MPP1	0.0302132	1.13874
ILMN_1676099	SPON2	0.00808448	1.1387
ILMN_1671046	HSPB2	0.00849263	1.13868
ILMN_1660114	MMRN1	0.040352	1.13862
ILMN_1678808	KIAA0831	0.00301107	1.13842
ILMN_1791569	PLXNA1	0.0393322	1.13841
ILMN_1756595	SH3TC1	0.0365751	1.13833
ILMN_1751789	HNMT	0.0240319	1.13799
ILMN_1794782	ABCG1	0.00301155	1.13798
ILMN_1659106	PHLDA3	0.0250508	1.13784
ILMN_1716547	NAGK	0.00172117	1.13782
ILMN_1713686	IL34	0.000187217	1.13779
ILMN_1713807	MAN1C1	0.00957693	1.13754
ILMN_1800951	ATXN1	0.000675824	1.13736
ILMN_1662419	COX7A1	0.0191818	1.13717
ILMN_1689456	ZBTB20	0.00154282	1.13713
ILMN_1710075	FAM89A	0.0259496	1.13678
ILMN_1689518	PECAM1	0.010235	1.13651
ILMN_1687971	CAPN3	0.0096461	1.13628
ILMN_1814726	SCARB2	2.3357e-06	1.13593
ILMN_1913678		0.0321489	1.13591
ILMN_1737089	CAPN5	0.00872779	1.13585
ILMN_1742332	KCTD12	0.0208909	1.13579
ILMN_1730504	AGPAT4	0.0142826	1.13567
ILMN_1701375	FBXW5	0.0329443	1.13559
ILMN_1680652	SELENBP1	0.0198111	1.13557
ILMN_1740900	BMP4	0.0474972	1.13526
ILMN_1699585	BHLHB5	0.0151912	1.13509
ILMN_1752968	LAMB2	0.00838242	1.13478
ILMN_1820295		0.0286858	1.1347
ILMN_1804798	BEXL1	0.00440963	1.13464
ILMN_1735743	FBLN7	0.0105081	1.13452
ILMN_1769250	ARFGAP2	0.0248414	1.1342
ILMN_1787823	LOC642560	0.0367421	1.134
ILMN_1768812	FXYD6	0.00744502	1.13372
ILMN_1739640	DCHS1	0.00761556	1.13329
ILMN_1705213	TMBIM1	0.000517114	1.13327
ILMN_1748124	TSC22D3	0.00073694	1.13309
ILMN_1783946	MRC2	0.0484663	1.13289
ILMN_1806721	MS4A2	0.00234392	1.13268
ILMN_1800276	RCN1	0.0153485	1.1325
ILMN_1796755	ITGB5	0.0471799	1.13223
ILMN_1693233	KIAA0513	5.94063e-05	1.13211
ILMN_1784706	GABRE	0.0379296	1.13209
ILMN_1814044	CABIN1	0.0389443	1.13201
ILMN_1717639	SNF1LK	0.0257428	1.13166
ILMN_1805395	LTBP3	0.0237139	1.1315
ILMN_1744937	PTPRM	0.00822768	1.13145
ILMN_1655405	SCARF2	0.036997	1.13133
ILMN_1836531		0.00209465	1.13091
ILMN_1669599	DENND4C	0.0479682	1.13089
ILMN_1680774	NALP1	0.017526	1.13054
ILMN_1731107	CCDC92	0.0053772	1.13046
ILMN_1783182	FBN1	0.0228987	1.13044
ILMN_1797975	CXCR3	0.0493316	1.13028
ILMN_1813139	ANKDD1A	0.0366805	1.13024
ILMN_1782098	SMO	0.00555609	1.13016
ILMN_1764571	ARHGAP23	0.0261193	1.13005
ILMN_1753342	SAT1	0.0138569	1.12996
ILMN_1756541	MXD4	0.00281186	1.12992
ILMN_1808501	SH3KBP1	0.0183264	1.12951
ILMN_1795344	GOLPH4	0.00971637	1.12917
ILMN_1720513	SETBP1	0.0464853	1.12892
ILMN_1769412	RAPGEF1	0.0116368	1.1289
ILMN_1652825	IL10RA	0.019526	1.12859
ILMN_1670272	LRP10	0.000913457	1.12855
ILMN_1815690	TIE1	0.0205147	1.12854
ILMN_1723358	SCARA3	0.00305651	1.12833
ILMN_1704286	FXYD5	0.0414519	1.12833
ILMN_1785413	KIAA0703	0.0170907	1.12777
ILMN_1790455	BCAM	0.0395418	1.12739
ILMN_1714700	TRIB2	0.0183404	1.12718
ILMN_1709399	SLC25A34	0.0388129	1.12718
ILMN_1728478	CXCL16	0.0443081	1.12705
ILMN_1673529	MGC15875	0.000286662	1.12684
ILMN_1662026	BTK	0.0361152	1.12679
ILMN_1728698	GDE1	0.00476598	1.12649
ILMN_1759341	MAN2B1	0.0218616	1.12645
ILMN_1725220	LOC90342	0.0167649	1.12624
ILMN_1802646	EPHB6	0.0146327	1.12621
ILMN_1742431	LOC651309	0.00867472	1.12607
ILMN_1819608		0.0447148	1.12606
ILMN_1674380	TRPC1	0.00891081	1.1257
ILMN_1782086	AOC3	0.0194534	1.12535
ILMN_1680037	FAM65A	0.0211555	1.12523
ILMN_1756910	PLA2G15	0.0193953	1.12522
ILMN_1730084	COMT	0.00340534	1.12518
ILMN_1722953	USP47	0.000330591	1.12509
ILMN_1760121	RRAGC	0.00618566	1.12495
ILMN_1758941	REEP5	0.000162132	1.12452
ILMN_1709101	AKAP13	0.00197442	1.12439
ILMN_1813295	LMO3	0.0361152	1.12438
ILMN_1680453	ITM2C	0.0346447	1.1242
ILMN_1695946	LOC388610	0.0034404	1.12398
ILMN_1711928	FLJ20920	0.0201735	1.12367
ILMN_1800221	LOC651962	0.0440342	1.12365
ILMN_1783149	CDH23	0.00229903	1.12357
ILMN_1797585	MYO1B	0.000309052	1.12327
ILMN_1841334		0.0424513	1.12319
ILMN_1768820	CYP11A1	0.00139565	1.12316
ILMN_1782057	ATP8B2	0.0214693	1.12289
ILMN_1780560	MYO18A	0.0163741	1.12286
ILMN_1684446	SPAG7	0.0104388	1.12268
ILMN_1755822	SYDE1	0.0210459	1.12267
ILMN_1657554	TSPYL2	0.00529563	1.12253
ILMN_1690839	PPAPDC3	0.0175516	1.12238
ILMN_1778136	ZMYND15	0.0169936	1.12233
ILMN_1774427	CALCOCO1	0.00575111	1.12227
ILMN_1739576	CYB5R2	0.031483	1.12218
ILMN_1700432	ITPKB	0.000564537	1.12213
ILMN_1784333	KIAA0256	0.000135327	1.12207
ILMN_1690682	B3GALT4	0.0007397	1.12202
ILMN_1685042	TENC1	0.01456	1.12183
ILMN_1691409	SEC31A	0.0227778	1.12158
ILMN_1666502	FLJ10159	0.00358772	1.12152
ILMN_1812795	RUNX1T1	0.00137511	1.12116
ILMN_1786598	COL14A1	0.0201363	1.12095
ILMN_1749868	FAM171A1	0.0167053	1.12067
ILMN_1705066	BTBD11	0.00452386	1.12064
ILMN_1802708	BTN3A1	0.0131207	1.12064
ILMN_1656927	SEMA5A	0.0196852	1.12064
ILMN_1729237	CYB5R1	0.00368934	1.12028
ILMN_1681945	ITGAD	0.0157839	1.11998
ILMN_1756408	PARVA	0.00121341	1.11997
ILMN_1734542	OVGP1	0.027348	1.11992
ILMN_1680624	CREG1	0.0394495	1.11981
ILMN_1712095	MLLT7	0.00356241	1.1198
ILMN_1788778	2011-09-01	0.028517	1.11972
ILMN_1659975	C1orf216	0.00822768	1.11963
ILMN_1758806	C21orf2	0.00763752	1.11918
ILMN_1769032	GLYATL1	5.58318e-05	1.11899
ILMN_1728785	GPR116	0.0319058	1.11875
ILMN_1655720	CNNM4	0.00401833	1.11847
ILMN_1717060	LOC654342	0.0218905	1.11844
ILMN_1740010	PCNX	0.00438171	1.11832
ILMN_1672350	JAM2	0.0169936	1.11754
ILMN_1744968	KCNAB1	0.0126403	1.11752
ILMN_1678454	CASP4	0.0269331	1.11751
ILMN_1780058	DEGS1	0.0478205	1.11708
ILMN_1657810	PPM1M	0.0108521	1.11702
ILMN_1690454	C3orf54	0.0150061	1.117
ILMN_1726466	HDHD3	0.0454444	1.11694
ILMN_1661194	CLDN14	0.0134562	1.11688
ILMN_1770641	KLHL3	0.0236128	1.11665
ILMN_1694589	PAQR8	0.0440869	1.11664
ILMN_1801441	RFTN2	0.00874446	1.11644
ILMN_1769409	C9orf123	0.00121105	1.11587
ILMN_1752510	FAM13A1	0.0254832	1.11568
ILMN_1729294	RNF130	0.00744502	1.11544
ILMN_1666545	GCNT1	0.0146327	1.11529
ILMN_1744795	TBL1X	0.0326366	1.11495
ILMN_1705035	FBXL7	0.00919952	1.11446
ILMN_1715698	MGC71993	0.00323566	1.11394
ILMN_1687247	SPATA20	0.0492819	1.11358
ILMN_1670926	GALNAC4S-6ST	0.00281186	1.11353
ILMN_1743340	CHST14	0.0112944	1.1135
ILMN_1813341	PTGFR	0.0304822	1.11349
ILMN_1878395		0.000196115	1.11342
ILMN_1815168	MGC15619	0.0053385	1.11324
ILMN_1743396	ACOX3	0.0148615	1.11318
ILMN_1709820	AOAH	0.0446435	1.1126
ILMN_1712400	SERPINB6	0.00121764	1.11251
ILMN_1798980	CAPZB	0.0250508	1.11236
ILMN_1699545	PCSK7	0.0358576	1.11222
ILMN_1731561	ROBO3	0.0198456	1.11212
ILMN_1882248		1.11257e-06	1.11199
ILMN_1736828	CHST10	0.010235	1.11168
ILMN_1833858		0.0346153	1.11161
ILMN_1781468	SMAP2	0.0129289	1.11139
ILMN_1795826	ATP6V0D1	0.0350535	1.11115
ILMN_1733627	NEDD4L	0.0459243	1.11105
ILMN_1667928	BRDT	0.00115792	1.11077
ILMN_1691539	LAT	0.00946393	1.11077
ILMN_1759549	SRGAP2	0.00191157	1.11071
ILMN_1742382	RIMS3	0.004602	1.1107
ILMN_1743966	BCL9L	0.0116633	1.1106
ILMN_1810267	DNHD1	0.0267788	1.1105
ILMN_1654629	TMEM175	0.0294862	1.11041
ILMN_1708805	NCOA3	0.0242356	1.11018
ILMN_1784608	CLEC2B	0.0255801	1.11006
ILMN_1740604	RAB11FIP5	0.000455822	1.10991
ILMN_1735788	HRIHFB2122	0.0089704	1.10929
ILMN_1699836	LOC649377	0.00895208	1.10916
ILMN_1771905	LOC389457	0.0030995	1.10882
ILMN_1730568	ZDHHC7	2.65088e-05	1.10863
ILMN_1723004	CD72	0.027348	1.10855
ILMN_1697115	FLJ12355	0.00577534	1.10829
ILMN_1770963	NAALADL1	0.00575997	1.10813
ILMN_1898723		0.0061642	1.10808
ILMN_1760647	HOXA3	0.0194525	1.10801
ILMN_1726981	VEGFB	0.00804383	1.10799
ILMN_1766200	CALHM2	0.00797429	1.10797
ILMN_1757847	C11orf68	0.00581214	1.10765
ILMN_1749372	GGTLA1	0.0350535	1.10764
ILMN_1739792	RHOG	0.0266078	1.10759
ILMN_1790098	OGN	0.0283196	1.10749
ILMN_1718621	TSPAN32	0.0085762	1.10745
ILMN_1810037	RUSC2	0.023928	1.10729
ILMN_1775182	GSR	0.0100284	1.10723
ILMN_1740160	PLCG1	0.0324799	1.10722
ILMN_1739751	SLC26A11	0.0132291	1.10695
ILMN_1720231	TNNT3	0.00934429	1.10688
ILMN_1674394	C20orf3	0.0325766	1.10686
ILMN_1780898	PRKCH	0.0184386	1.10676
ILMN_1735432	ISCU	0.00129182	1.10671
ILMN_1685052	DNAH1	0.0435012	1.10662
ILMN_1733841	TCF7L1	0.000543682	1.10639
ILMN_1781580	BRI3	0.0189264	1.10635
ILMN_1723935	LOC645362	0.00129182	1.10613
ILMN_1658677	DTX3	0.039463	1.10592
ILMN_1752668	DAAM2	0.00171089	1.10558
ILMN_1746148	LRRC33	0.0413325	1.10547
ILMN_1796339	PLEKHA2	0.0102514	1.10529
ILMN_1652638	LRRC58	0.00487978	1.10526
ILMN_1730917	KMO	0.0355769	1.10512
ILMN_1801833	ARHGAP24	0.00314743	1.10511
ILMN_1794370	SEMA5B	0.001975	1.10505
ILMN_1742781	KIRREL	0.0453775	1.10478
ILMN_1732782	SCN2A2	0.0365751	1.10462
ILMN_1700583	FLJ13841	0.0294205	1.10443
ILMN_1792495	AHNAK	0.0435816	1.10403
ILMN_1769810	ARL6IP5	0.0159222	1.10399
ILMN_1794914	UBTD1	0.0468944	1.10399
ILMN_1713162	GSTM2	0.0244955	1.10383
ILMN_1660880	RNH1	0.0199107	1.10375
ILMN_1665526	TCEA2	0.028015	1.1027
ILMN_1661804	CTF1	0.00687985	1.10258
ILMN_1771538	PSCA	0.0031744	1.10231
ILMN_1741389	B3GNT8	0.0216702	1.10198
ILMN_1746578	SLC23A2	0.000456095	1.1019
ILMN_1811972	MYCBP2	0.0368922	1.10178
ILMN_1781010	ARHGEF3	0.0250604	1.10154
ILMN_1715214	PTPN7	0.0355769	1.10152
ILMN_1657983	TERF2IP	0.0179608	1.10146
ILMN_1716678	NPC2	0.0468631	1.10142
ILMN_1791702	SMARCA2	0.00744502	1.10123
ILMN_1721136	H6PD	0.0300814	1.10119
ILMN_1672135	ZNF615	0.0187854	1.10116
ILMN_1804419	LRMP	0.0151157	1.10068
ILMN_1703142	2002-03-01	0.00589327	1.10052
ILMN_1795285	PHF15	0.0357481	1.10043
ILMN_1700633	ABHD4	0.0111396	1.1004
ILMN_1813753	PTN	0.0438093	1.10037
ILMN_1813763	SLC20A2	0.0215667	1.09968
ILMN_1748281	MAPK10	0.0160447	1.09956
ILMN_1798212	LLGL1	0.0432317	1.0995
ILMN_1796928	BPIL1	0.00874137	1.09949
ILMN_1651557	KDELC2	0.0373813	1.09929
ILMN_1791912	SIDT2	0.0131207	1.09916
ILMN_1736628	ORAI3	0.039463	1.09913
ILMN_1666597	PI4KB	0.028407	1.09898
ILMN_1688318	MGC72104	0.046292	1.09898
ILMN_1727495	L3MBTL3	0.0150416	1.0989
ILMN_1747205	JDP2	0.0284183	1.09878
ILMN_1762466	BBS4	0.0478205	1.09862
ILMN_1660186	SYF2	0.00049853	1.09858
ILMN_1806533	PDE7B	0.0139194	1.09855
ILMN_1732343	KIAA0999	0.0116857	1.09844
ILMN_1729095	PDZK3	0.00151565	1.09838
ILMN_1737211	ZNF585A	0.0380152	1.09825
ILMN_1736757	GNPTAB	0.0417596	1.09823
ILMN_1814971	TCF25	0.0132952	1.09813
ILMN_1676215	FLJ37266	0.000925221	1.09783
ILMN_1762678	NMT1	0.0418639	1.09782
ILMN_1910948		0.00426888	1.09768
ILMN_1767475	CERK	0.0329443	1.09761
ILMN_1692398	CNTNAP1	0.0465667	1.09754
ILMN_1708946	VPS4A	0.0231058	1.09725
ILMN_1904238		0.043641	1.09716
ILMN_1659599	ADC	0.0078388	1.0969
ILMN_1910120		0.0194534	1.09672
ILMN_1655904	ROR1	0.0376853	1.0965
ILMN_1772876	ZNF395	0.029948	1.09624
ILMN_1696675	CES2	0.00583259	1.09615
ILMN_1683415	CAMK2D	0.0379777	1.09615
ILMN_1735402	WDR22	0.0274308	1.09608
ILMN_1811029	TLK1	0.012277	1.09605
ILMN_1656368	ALDH4A1	0.0192786	1.09597
ILMN_1697800	LOC388284	0.000215234	1.09595
ILMN_1757370	SMPD1	0.0213474	1.09584
ILMN_1656840	VPS13D	0.000419188	1.09583
ILMN_1695947	SCN4B	0.0142849	1.09567
ILMN_1796628	ADAMTS2	0.0457545	1.09536
ILMN_1705848	FAM104B	0.0430781	1.09528
ILMN_1690530	LOC90342	0.0413325	1.09479
ILMN_1792508	TMEM59	0.0190758	1.09477
ILMN_1726597	FAM65B	0.0328218	1.09473
ILMN_1814823	FTL	0.0433983	1.09456
ILMN_1737387	LOC653257	0.0131676	1.09438
ILMN_1783889	PRKAA1	0.00329656	1.09436
ILMN_1727466	KCNMB4	0.0270986	1.09427
ILMN_1693635	TSPYL2	0.0399747	1.09418
ILMN_1891857		0.00592975	1.09398
ILMN_1703565	GLTSCR2	0.00211856	1.09393
ILMN_1701911	C5orf20	0.0183446	1.09372
ILMN_1729915	PILRA	0.0155545	1.09354
ILMN_1726624	YPEL4	0.00411409	1.09311
ILMN_1778203	CLN5	0.0457597	1.0931
ILMN_1720926	PSMD5	0.0374507	1.09292
ILMN_1746676	CLDN8	0.0425141	1.09246
ILMN_1798659	CCDC28A	0.0435224	1.09244
ILMN_1667239	INPP1	0.0398214	1.09227
ILMN_1684922	LOC644322	0.0424198	1.09223
ILMN_1697827	ATP2A3	0.0390209	1.09205
ILMN_1769091	PRCP	0.0306138	1.09194
ILMN_1733579	EVI2A	0.0366786	1.0914
ILMN_1794470	ANKFY1	0.00401833	1.09136
ILMN_1794490	FLJ10781	0.0269664	1.09124
ILMN_1652736	RPS6KA3	0.0298839	1.09102
ILMN_1788531	SIT1	0.0106841	1.09089
ILMN_1666076	ARHGEF4	0.000784643	1.09086
ILMN_1911721		0.00919483	1.0905
ILMN_1684402	STXBP5	0.0327443	1.09046
ILMN_1689336	HOXA10	0.0141994	1.09042
ILMN_1706217	TLR4	0.0100706	1.09041
ILMN_1695959	C21orf63	0.0191522	1.09017
ILMN_1826531		0.0228987	1.09015
ILMN_1745811	TDRD3	0.00241039	1.09012
ILMN_1658399	KLRG1	0.0213474	1.09007
ILMN_1702073	ODF2L	0.026428	1.08985
ILMN_1751452	NDFIP1	0.0219499	1.0898
ILMN_1677877	UBE2L3	0.0171326	1.0893
ILMN_1675684	APOBEC3C	0.0380289	1.08923
ILMN_1796772	ARHGAP28	0.0248674	1.08885
ILMN_1882649		0.00293573	1.08871
ILMN_1809894	TMEM117	0.0305512	1.0887
ILMN_1692742	DENND3	0.0062601	1.08863
ILMN_1802380	RERE	0.00744502	1.08859
ILMN_1662161	TBC1D13	0.0328769	1.08854
ILMN_1771376	PEA15	0.0362361	1.08816
ILMN_1701655	SLC24A6	0.030604	1.08813
ILMN_1687213	C8orf13	0.0411632	1.08809
ILMN_1748812	TMEM130	0.0142977	1.08796
ILMN_1789266	CCDC25	0.0430781	1.08793
ILMN_1652082	ELF4	0.0355901	1.08762
ILMN_1696701	LOC344595	0.0136456	1.08751
ILMN_1692464	FLJ20699	0.0350535	1.08716
ILMN_1752117	TMEM55A	0.016829	1.08701
ILMN_1714397	CRYL1	0.005823	1.08686
ILMN_1815102	LCAT	0.0284553	1.08669
ILMN_1660027	FCGR2B	0.0370191	1.08664
ILMN_1674759	AGPAT7	0.0179811	1.08635
ILMN_1669177	DHRS12	0.00522788	1.08601
ILMN_1808122	C1QTNF4	0.0324386	1.08595
ILMN_1728999	LOC651369	0.0018432	1.08569
ILMN_1658684	ATP9B	0.0417596	1.08551
ILMN_1760245	TMEM42	0.0383071	1.08547
ILMN_1763688	C17orf49	0.0424614	1.08541
ILMN_1703695	C19orf12	0.00179983	1.08524
ILMN_1700606	RNF43	0.0188956	1.08513
ILMN_1719792	PHLDB2	0.0154467	1.08502
ILMN_1804629	TPK1	0.0254634	1.08477
ILMN_1693293	LOC648176	0.0326433	1.08441
ILMN_1722073	WBSCR14	0.0492383	1.0844
ILMN_1714384	PCCA	0.0106166	1.08433
ILMN_1733616	TFEB	0.0224979	1.0843
ILMN_1909156		0.0478205	1.08428
ILMN_1671969	UGP2	0.0379777	1.08425
ILMN_1705210	GRASP	0.0307257	1.08403
ILMN_1695745	DISP1	0.0250508	1.08384
ILMN_1812091	FAM20A	0.0318331	1.08381
ILMN_1705685	MEIS1	0.0483937	1.08376
ILMN_1841620		0.00335309	1.0836
ILMN_1684440	PXN	0.0397313	1.08345
ILMN_1807919	TNS1	0.025983	1.08337
ILMN_1810488	NFYC	0.00488498	1.08321
ILMN_1749109	PSAP	0.0234745	1.08306
ILMN_1677603	C1S	0.00105563	1.08262
ILMN_1654210	CD1C	0.0142977	1.08227
ILMN_1774261	DOK4	0.0492383	1.08217
ILMN_1769665	RAB5C	0.0249999	1.08183
ILMN_1703886	SLC16A2	0.0271582	1.08183
ILMN_1745849	ENTPD5	0.029475	1.08142
ILMN_1812902	CYYR1	0.0468944	1.08138
ILMN_1773901	STX12	0.000571891	1.08131
ILMN_1794364	CTSW	0.0110266	1.08131
ILMN_1688242	C6	0.0462297	1.08126
ILMN_1692535	DPP4	0.00494638	1.08096
ILMN_1654065	ATOH8	0.0361433	1.08092
ILMN_1738494	AQP7	0.0488761	1.08065
ILMN_1768391	ARL4C	0.0034086	1.0804
ILMN_1738047	C10orf73	0.00767522	1.07937
ILMN_1693483	FGF18	0.00526077	1.07888
ILMN_1810942	CYP3A5	0.0125406	1.07878
ILMN_1794386	IL2RG	0.0436079	1.07871
ILMN_1735798	OSBPL3	0.00438171	1.0787
ILMN_1825186		0.020059	1.07858
ILMN_1684210	NPAL3	0.0189737	1.07844
ILMN_1680434	MAPK8IP1	0.0367633	1.07822
ILMN_1793287	LOC642755	0.0267207	1.07778
ILMN_1745991	GNRH1	0.039525	1.07745
ILMN_1815158	GPS2	0.0462297	1.07732
ILMN_1776076	POFUT1	0.0360826	1.07713
ILMN_1739744	LOC339879	0.0433881	1.07664
ILMN_1685796	CSDE1	0.0278656	1.07663
ILMN_1752914	CDGAP	0.0262523	1.07651
ILMN_1725787	RFX1	0.0344631	1.07629
ILMN_1786021	PRKAB2	0.018037	1.07627
ILMN_1776363	ANK2	0.00746859	1.07601
ILMN_1734346	C19orf36	0.0293279	1.07589
ILMN_1651800	GSTM4	0.00991696	1.07583
ILMN_1713454	ZNF671	0.042515	1.07565
ILMN_1695711	FAM105A	0.0472507	1.07558
ILMN_1813911	HEXA	0.00095529	1.07498
ILMN_1791436	EZH1	0.0183404	1.07471
ILMN_1740742	UROD	0.00235573	1.07469
ILMN_1724070	MAP3K14	0.0223108	1.07437
ILMN_1761788	MOXD1	0.0468944	1.07432
ILMN_1792551	C1orf175	0.0218616	1.07429
ILMN_1756006	ATG2A	0.0414316	1.07427
ILMN_1659761	LOC653761	0.044133	1.07423
ILMN_1699188	LOC144481	0.0103994	1.07421
ILMN_1687035	TSRC1	0.0339308	1.07414
ILMN_1794510	LOC648075	0.0221966	1.07396
ILMN_1767343	LOC126147	0.0146437	1.07364
ILMN_1765076	DIP13B	0.042718	1.0736
ILMN_1755016	SLC26A10	0.00733034	1.07341
ILMN_1714527	VAMP3	0.0147291	1.07338
ILMN_1736562	TRIM39	0.00649968	1.07333
ILMN_1778956	STS	0.00283267	1.07312
ILMN_1749345	STX5A	0.0220186	1.07304
ILMN_1727479	TPRG1L	0.0149221	1.07246
ILMN_1654586	RASA3	0.0490891	1.07241
ILMN_1683215	ZBED3	0.0432315	1.07235
ILMN_1729831	LOC388814	0.0236498	1.07214
ILMN_1844408		0.0211134	1.07192
ILMN_1842850		0.0316622	1.07186
ILMN_1808898	NPR2	0.0417596	1.07161
ILMN_1769637	RNMT	0.0256997	1.07095
ILMN_1773850	FXC1	0.0322447	1.07092
ILMN_1750790	GSTM5	0.0324799	1.07066
ILMN_1722829	HLF	0.0324799	1.0706
ILMN_1724634	LOC645550	0.0217209	1.07054
ILMN_1831834		0.0443081	1.07033
ILMN_1684629	C20orf26	0.0025326	1.07025
ILMN_1795561	CAMK1D	0.0391168	1.06992
ILMN_1790008	CYP2U1	0.0236498	1.06977
ILMN_1661443	GRAMD2	0.0288785	1.0697
ILMN_1672591	SCN9A	0.0175576	1.0696
ILMN_1706859	C22orf32	0.0436368	1.06909
ILMN_1696380	GHRL	0.0153496	1.06886
ILMN_1789535	DHDDS	0.0135592	1.06882
ILMN_1702226	C21orf34	0.0161451	1.06881
ILMN_1662681	AMBRA1	0.028712	1.06855
ILMN_1797021	TMEM86A	0.0401422	1.0684
ILMN_1893679		0.0110452	1.06827
ILMN_1772131	IL1R2	0.0421823	1.06807
ILMN_1678087	MAP3K4	0.0300814	1.06762
ILMN_1886847		0.0249999	1.06717
ILMN_1719938	FGF11	0.0391985	1.06601
ILMN_1677829	SLC9A6	0.0318782	1.06575
ILMN_1691458	SYPL1	0.0150718	1.06538
ILMN_1759598	DLX5	0.0370188	1.06437
ILMN_1772224	KCNJ5	0.0405661	1.06407
ILMN_1692834	C1orf26	0.015813	1.06356
ILMN_1879603		0.0394495	1.06355
ILMN_1761812	DMD	0.0462297	1.06348
ILMN_1805979	GAB3	0.0442801	1.06318
ILMN_1668270	ZDHHC18	0.0403757	1.06217
ILMN_1722718	BMP2	0.0110452	1.06196
ILMN_1880425		0.00111972	1.06183
ILMN_1652687	LOC440104	0.0067444	1.06175
ILMN_1675671	ICOSLG	0.0218236	1.06134
ILMN_1725750	LOC644695	0.0325616	1.06108
ILMN_1893728		0.00989044	1.06094
ILMN_1707591	TNIP3	0.028015	1.06089
ILMN_1780591	FAT3	0.0223851	1.06075
ILMN_1742869	TBC1D20	0.0134297	1.06068
ILMN_1792265	TRIM4	0.0398543	1.06052
ILMN_1693879	RANBP3L	0.0123734	1.0605
ILMN_1661293	ZNF224	0.0236128	1.06014
ILMN_1727633	PVRL3	0.028015	1.06006
ILMN_1807244	STGC3	0.0215247	1.05997
ILMN_1668510	GLYAT	0.00589772	1.05985
ILMN_1659952	MTMR2	0.0460771	1.05985
ILMN_1714428	FBXO17	0.0278929	1.05955
ILMN_1810727	LOC283130	0.0124314	1.05951
ILMN_1706266	RNF157	0.0208781	1.05944
ILMN_1706734	ZNF451	0.0427082	1.0591
ILMN_1655864	LOC653853	0.0263796	1.05844
ILMN_1785768	PDE4A	0.0343055	1.05837
ILMN_1815238	MAP2K3	0.0110266	1.05794
ILMN_1671451	LOC654201	0.00699068	1.05763
ILMN_1727084	C9orf94	0.0129631	1.05761
ILMN_1739154	LSAMP	0.0299065	1.05743
ILMN_1803720	SLC16A5	0.0357481	1.05725
ILMN_1714821	LOC646638	0.0157684	1.05659
ILMN_1784083	NOPE	0.0478205	1.056
ILMN_1664607	NRIP2	0.0464853	1.05503
ILMN_1735124	OXT	0.0472507	1.05494
ILMN_1895548		0.0249964	1.05487
ILMN_1741281	RNF175	0.0494369	1.05466
ILMN_1887267		0.0304038	1.05437
ILMN_1731178	ARHGAP28	0.0322447	1.05416
ILMN_1682987	PDZRN4	0.0468944	1.05394
ILMN_1689699	LOC652002	0.0325766	1.05367
ILMN_1769155	CYP2C8	0.0439631	1.05347
ILMN_1799099	TEKT3	0.00687975	1.05291
ILMN_1672066	C20orf194	0.0339308	1.05257
ILMN_1757183	LOC650494	0.0136456	1.05143
ILMN_1670718	C18orf51	0.0247101	1.05126
ILMN_1815121	PLAGL1	0.0273047	1.05107
ILMN_1799030	CMTM2	0.00248949	1.05101
ILMN_1726392	NIN	0.0457545	1.05066
ILMN_1665547	CADPS	0.0477034	1.05055
ILMN_1813949	CASQ1	0.0383337	1.05048
ILMN_1709434	VIT	0.0263796	1.05034
ILMN_1694140	AFAP1L1	0.0370191	1.05032
ILMN_1698512	LOC644116	0.0302132	1.04983
ILMN_1664909	LOC645209	0.0317597	1.04972
ILMN_1745447	HIVEP2	0.0366786	1.04969
ILMN_1700203	KIAA1984	0.0439631	1.04872
ILMN_1672554	C17orf81	0.0465659	1.04812
ILMN_1802414	CA13	0.0338874	1.04775
ILMN_1790984	LOC642373	0.0144942	1.04774
ILMN_1752299	RAB6B	0.0394305	1.04721
ILMN_1683179	RRAD	0.0481053	1.0465
ILMN_1801853	DPY19L2	0.0197157	1.04628
ILMN_1652604	LOC645367	0.0403757	1.04573
ILMN_1716461	LGI4	0.0282858	1.04561
ILMN_1740024	NAALAD2	0.0493316	1.04553
ILMN_1681882	CETP	0.0192386	1.04498
ILMN_1691648	TRO	0.0438757	1.04486
ILMN_1801090	KA21	0.0451623	1.04428
ILMN_1705743	FLJ10357	0.036911	1.04391
ILMN_1736954	ZBTB7B	0.0450276	1.04303
ILMN_1767393	GRIA3	0.0262054	1.0426
ILMN_1910770		0.0186165	1.04232
ILMN_1887008		0.0433881	1.04177
ILMN_1661777	NR3C2	0.0493316	1.04166
ILMN_1819690		0.0309758	1.04101
ILMN_1740585	UMOD	0.0329443	1.04091
ILMN_1702009	SV2A	0.0425141	1.04072
ILMN_1716421	ADRA1D	0.0270986	1.03591
ILMN_1691333	ZNF57	0.0438093	-1.03317
ILMN_1695549	PVRL1	0.0470332	-1.03431
ILMN_1659536	FAM24B	0.0468944	-1.03498
ILMN_1668246	TMEM52	0.0425141	-1.03691
ILMN_1656380	LOC124216	0.00933183	-1.03767
ILMN_1809883	CCDC134	0.0148028	-1.03858
ILMN_1656798	TIMM17A	0.0493955	-1.03889
ILMN_1741556	MTMR1	0.00891081	-1.04063
ILMN_1798817	HSPC105	0.0355512	-1.04069
ILMN_1784203	ACRBP	0.0461892	-1.04078
ILMN_1854664		0.0306455	-1.0411
ILMN_1793302	WDR4	0.0178651	-1.04138
ILMN_1651710	IQCD	0.0457545	-1.04159
ILMN_1823555		0.0288785	-1.04214
ILMN_1716957	C1QL1	0.0237139	-1.04249
ILMN_1709583	LOC644019	0.0457036	-1.0429
ILMN_1723815	LOC649270	0.0436079	-1.04296
ILMN_1737413	MSH2	0.0472507	-1.04372
ILMN_1719870	GCUD2	0.00979447	-1.04403
ILMN_1742089	NLN	0.038374	-1.04434
ILMN_1799011	CEP250	0.0434473	-1.04448
ILMN_1790659	GNL3	0.0403003	-1.0448
ILMN_1696946	LOC654174	0.048606	-1.04496
ILMN_1793033	RBM28	0.0252955	-1.04501
ILMN_1682736	LOC643452	0.0367798	-1.04502
ILMN_1715540	TRAIP	0.00296096	-1.04504
ILMN_1732336	RFC2	0.0271864	-1.04539
ILMN_1780188	B3GALNT2	0.0375887	-1.0454
ILMN_1793012	FLJ10803	0.0131237	-1.04542
ILMN_1652314	SPAG1	0.0478205	-1.04594
ILMN_1802192	C10orf99	0.0223595	-1.04602
ILMN_1785742	AMZ1	0.0256391	-1.04605
ILMN_1676240	LOC653473	0.0459243	-1.04653
ILMN_1763328	GZF1	0.00899982	-1.04684
ILMN_1775328	MTG1	0.0406332	-1.04751
ILMN_1744815	PVRL1	0.00841713	-1.04754
ILMN_1667609	SNORD35A	0.0107163	-1.04774
ILMN_1792107	ERCC8	0.016185	-1.04827
ILMN_1810834	MSH5	0.0325766	-1.0484
ILMN_1800058	NKX2-5	0.028407	-1.04849
ILMN_1714223	LETM2	0.0217652	-1.04863
ILMN_1678404	FBXO11	0.0202154	-1.04886
ILMN_1779373	HIST1H2BF	0.00954881	-1.04898
ILMN_1791002	SKP2	0.0193385	-1.04909
ILMN_1686454	TIFA	0.0383337	-1.04942
ILMN_1749180	RBM35A	0.029475	-1.04964
ILMN_1660754	C13orf25	0.0148028	-1.04968
ILMN_1778152	FIGNL1	0.0475971	-1.0503
ILMN_1748529	RLN2	0.0357049	-1.05043
ILMN_1814737	LNPEP	0.0218236	-1.0506
ILMN_1772703	OTUD6B	0.0354342	-1.05096
ILMN_1662184	C5orf34	0.0186165	-1.05135
ILMN_1777322	FAM91A1	0.0325766	-1.05144
ILMN_1695717	RBM41	0.0351841	-1.05164
ILMN_1705656	C18orf16	0.0111195	-1.05212
ILMN_1730867	AZU1	0.032644	-1.05218
ILMN_1682368	LRWD1	0.0493251	-1.05224
ILMN_1741455	USP30	0.00594543	-1.05335
ILMN_1768273	POP1	0.00575111	-1.05348
ILMN_1747423	LOC389901	0.0427454	-1.05359
ILMN_1795666	SNX24	0.0259141	-1.05393
ILMN_1660938	TOE1	0.00434034	-1.054
ILMN_1736834	SKIL	0.0414519	-1.05412
ILMN_1692936	OVOL1	0.0145134	-1.05445
ILMN_1673270	FLJ31132	0.00647565	-1.05501
ILMN_1745593	STMN1	0.012446	-1.05561
ILMN_1756043	WDHD1	0.0101489	-1.05573
ILMN_1680349	RIBC2	0.00271075	-1.05591
ILMN_1772957	FLJ23322	0.045955	-1.05598
ILMN_1789059	GDAP2	0.00608524	-1.05601
ILMN_1812503	PHKA1	0.0398214	-1.05622
ILMN_1806463	CTAGE6	0.0322447	-1.05651
ILMN_1651296	FLT4	0.0178999	-1.05678
ILMN_1792435	STAG1	0.0380289	-1.05678
ILMN_1697817	PANX1	0.0370191	-1.05679
ILMN_1796130	LOC221710	0.00934944	-1.05689
ILMN_1809708	KCTD21	0.0160338	-1.05703
ILMN_1741224	DKFZp762F0713	0.0295412	-1.05703
ILMN_1793040	ADAMTSL5	0.0142977	-1.05713
ILMN_1781764	HNRNPH2	0.00921368	-1.05743
ILMN_1657898	MTP18	0.0113344	-1.05783
ILMN_1805973	GPR19	0.013511	-1.05818
ILMN_1710001	RPL41	0.0250508	-1.05841
ILMN_1775759	NRAS	0.0294862	-1.05855
ILMN_1789944	MGC5352	0.00744502	-1.05965
ILMN_1910908		0.0475971	-1.06001
ILMN_1752639	SLC25A24	0.0138686	-1.06038
ILMN_1768020	NY-SAR-48	0.0478205	-1.06039
ILMN_1870111		0.00854394	-1.06056
ILMN_1777156	GTPBP3	0.0375952	-1.06078
ILMN_1683052	PTRH2	0.00438703	-1.06112
ILMN_1733970	BAG1	0.00314586	-1.06129
ILMN_1653372	ATP8B3	0.0493316	-1.06141
ILMN_1651428	SYTL2	0.0497903	-1.06158
ILMN_1696038	LOC150051	0.00763752	-1.06174
ILMN_1781867	FOXD4L1	0.0170392	-1.06196
ILMN_1805812	TOR1A	0.0334523	-1.06198
ILMN_1798014	EIF2S2	0.00404244	-1.06224
ILMN_1776552	FUBP1	0.0424198	-1.06242
ILMN_1747279	ZNF648	0.0379946	-1.06254
ILMN_1718132	ECHS1	0.0320674	-1.06265
ILMN_1708382	TMEM103	0.0487351	-1.06269
ILMN_1740161	ANKRD26	0.0220533	-1.06338
ILMN_1703075	PYY	0.0288785	-1.0636
ILMN_1654691	FKBP3	0.0430781	-1.06361
ILMN_1730928	CDK5R1	0.0482152	-1.06411
ILMN_1718033	LYPD5	0.0483112	-1.06412
ILMN_1794157	CATSPER2P1	0.0138686	-1.06419
ILMN_1728225	KIAA1524	0.000508772	-1.06444
ILMN_1732926	PVT1	0.00149372	-1.06465
ILMN_1730464	DNAL1	0.00429801	-1.06482
ILMN_1728435	C12orf45	0.0293279	-1.06494
ILMN_1734826	NUP88	0.042515	-1.06507
ILMN_1753413	HRIHFB2122	0.00161466	-1.06511
ILMN_1660222	MTBP	0.00211856	-1.06513
ILMN_1667707	SPCS3	0.0163741	-1.06529
ILMN_1785345	GPR84	0.0138942	-1.06534
ILMN_1665311	STH	0.00304126	-1.0656
ILMN_1766902	LOC653904	0.0208781	-1.06564
ILMN_1667977	TAF1B	0.0404372	-1.06601
ILMN_1748707	CRELD2	0.0422818	-1.06629
ILMN_1679177	MARS2	0.0404558	-1.0663
ILMN_1731070	ORC6L	0.00112747	-1.06633
ILMN_1750711	MYO19	0.00874446	-1.06649
ILMN_1778347	NUDT2	0.0142414	-1.06676
ILMN_1777483	CXorf33	0.00300438	-1.06708
ILMN_1727315	DENND1A	0.0077824	-1.06716
ILMN_1664398	LOC651621	0.024314	-1.06717
ILMN_1713875	NME1	0.00154481	-1.06722
ILMN_1722292	KIAA0241	0.00387545	-1.06741
ILMN_1738356	LOC402694	0.0142894	-1.06749
ILMN_1802411	ITGA1	0.0499589	-1.06773
ILMN_1712628	GTF2IRD1	0.039463	-1.06776
ILMN_1699082	MAPKAPK5	0.0349868	-1.06838
ILMN_1734608	ZNF77	0.0177271	-1.06848
ILMN_1745262	FLJ38964	0.0430781	-1.06877
ILMN_1795927	LOC642395	0.0268959	-1.06881
ILMN_1665492	SORCS1	0.033101	-1.06917
ILMN_1762407	CABLES2	0.0141994	-1.06972
ILMN_1781721	DDX31	0.0427454	-1.06977
ILMN_1720833	C2orf48	0.00127345	-1.07008
ILMN_1720093	PCP2	0.0402618	-1.0702
ILMN_1709085	GSG2	2.35541e-05	-1.07024
ILMN_1751075	SETD4	0.00108237	-1.07026
ILMN_1748923	SMC2L1	0.00173759	-1.07064
ILMN_1783610	HELLS	3.61818e-05	-1.07092
ILMN_1745420	PHF19	0.00579716	-1.07101
ILMN_1659523	USP39	0.0357016	-1.07103
ILMN_1674411	CKAP2	0.0365751	-1.07132
ILMN_1698072	PITRM1	0.0213474	-1.07135
ILMN_1790741	RNF126	0.0350535	-1.07144
ILMN_1710523	ATP8B1	0.00143175	-1.07154
ILMN_1725366	SLC27A5	0.0382245	-1.07165
ILMN_1775677	TYSND1	0.0366786	-1.07176
ILMN_1813938	CHCHD4	0.0293109	-1.07189
ILMN_1753790	ZNF259	0.0104388	-1.07196
ILMN_1722809	NRCAM	0.0359664	-1.07215
ILMN_1687107	RFWD3	0.0381519	-1.07224
ILMN_1701882	LOC653573	7.66219e-05	-1.07265
ILMN_1772132	ATP5B	0.017777	-1.07337
ILMN_1723158	NOL1	0.0463328	-1.07396
ILMN_1677764	LOC440905	0.0134562	-1.07397
ILMN_1777066	NIF3L1	0.0269664	-1.07449
ILMN_1888609		0.0208298	-1.07453
ILMN_1788254	MGC5352	0.0376678	-1.07455
ILMN_1805985	ANKRD32	0.00123688	-1.07462
ILMN_1779381	SEC61A2	0.00314743	-1.07468
ILMN_1697998	FAM54A	1.3956e-05	-1.07471
ILMN_1758852	ENTPD7	0.000805773	-1.07478
ILMN_1677953	OGFOD1	0.0383764	-1.075
ILMN_1654692	RALGPS2	0.020468	-1.07535
ILMN_1814643	LOC647333	0.0100362	-1.07537
ILMN_1759915	ARPC1A	0.0405743	-1.0754
ILMN_1803005	MMACHC	0.0224248	-1.07546
ILMN_1659620	MYCBP	0.0056824	-1.07574
ILMN_1754531	AP4E1	0.0300814	-1.07603
ILMN_1684271	ACBD6	0.0053699	-1.07615
ILMN_1807016	LHX2	0.00264512	-1.07646
ILMN_1736096	DLL3	0.0263796	-1.07648
ILMN_1785324	MTHFD1	0.00329656	-1.07652
ILMN_1678579	CPT2	0.0428424	-1.07661
ILMN_1712530	AKAP1	0.0185199	-1.07691
ILMN_1787308	PIP4K2C	0.0364803	-1.07696
ILMN_1785037	SSR2	0.00325639	-1.07697
ILMN_1812688	C2orf18	0.0438093	-1.07697
ILMN_1738369	TUFM	0.0165161	-1.07722
ILMN_1801845	DNAL4	0.0400004	-1.07723
ILMN_1662970	POMZP3	0.0212995	-1.07737
ILMN_1683562	SNRPG	0.0223611	-1.07757
ILMN_1806106	GNL3	0.0344934	-1.07784
ILMN_1691966	FLJ35934	0.0310684	-1.07791
ILMN_1697348	WBSCR22	0.0233852	-1.07807
ILMN_1789001	SLC35B2	0.029681	-1.07808
ILMN_1654421	MPHOSPH9	0.000508772	-1.07826
ILMN_1652913	EZH2	0.000746963	-1.0783
ILMN_1750338	C10orf47	0.0057832	-1.0783
ILMN_1720604	ARSG	0.0229285	-1.07843
ILMN_1654653	KNS2	0.0107037	-1.07865
ILMN_1756049	NT5DC3	0.0134562	-1.07877
ILMN_1814156	PSMB7	0.0141731	-1.07885
ILMN_1723211	L2HGDH	0.0267477	-1.07903
ILMN_1779399	SNRPA	0.0298147	-1.07912
ILMN_1805658	LTV1	0.0165727	-1.07914
ILMN_1743635	ALG14	0.040696	-1.07937
ILMN_1708328	RAB11FIP3	0.0274914	-1.07944
ILMN_1800465	LOC654042	0.0459296	-1.07946
ILMN_1721138	GRPEL2	0.0289576	-1.07977
ILMN_1805828	VRK1	0.00320704	-1.07991
ILMN_1652505	APEX2	0.0357215	-1.08054
ILMN_1783728	TBRG4	0.0404225	-1.08062
ILMN_1717403	C9orf100	0.000779043	-1.08081
ILMN_1652008	C15orf23	0.00216406	-1.081
ILMN_1673917	GTF2I	0.00420589	-1.08111
ILMN_1758674	TMEM93	0.0390209	-1.08114
ILMN_1710756	ENO1	0.0471479	-1.08115
ILMN_1669052	LRRC8E	0.00114986	-1.08117
ILMN_1655577	TIAM1	0.00965129	-1.08125
ILMN_1688725	UTP14A	0.0493316	-1.08151
ILMN_1761147	GABPB2	0.00439231	-1.08189
ILMN_1669142	NARG1	0.0223611	-1.08196
ILMN_1711139	VPS37A	0.0241418	-1.08209
ILMN_1667932	LOC652726	0.0482152	-1.08212
ILMN_1797074	EMG1	0.00264077	-1.0822
ILMN_1682857	NDUFA12L	0.0445326	-1.08234
ILMN_1758915	PDCD2	0.0145932	-1.08269
ILMN_1808792	ALKBH6	0.00756761	-1.08273
ILMN_1759743	MGC15523	0.0126931	-1.08274
ILMN_1748116	FAM51A1	0.0201992	-1.08284
ILMN_1812580	YDJC	0.00565961	-1.08286
ILMN_1663132	ADCK2	0.0192266	-1.08318
ILMN_1774685	IL24	0.0137075	-1.08328
ILMN_1712634	TIA1	0.0492454	-1.08328
ILMN_1777584	KARS	0.0163741	-1.08332
ILMN_1804113	RFXANK	0.0379946	-1.08337
ILMN_1746426	TOMM70A	0.00519345	-1.08345
ILMN_1783333	C16orf61	0.0454873	-1.08345
ILMN_1675501	SENP5	0.00339665	-1.08372
ILMN_1679891	NAF1	0.0137137	-1.08374
ILMN_1660292	MRPS21	0.0383686	-1.08385
ILMN_1757627	ZMYND19	0.0179856	-1.08394
ILMN_1651684	KIAA0586	0.00141318	-1.08397
ILMN_1661940	CAMTA1	0.0185199	-1.08403
ILMN_1801913	PPIH	0.0248013	-1.08425
ILMN_1653263	KIAA1893	0.00197272	-1.08427
ILMN_1713688	DHX32	0.00525019	-1.08435
ILMN_1656129	SLC39A10	0.0405743	-1.0845
ILMN_1664167	BXDC1	0.00872779	-1.08478
ILMN_1760153	GATA5	0.0188186	-1.0849
ILMN_1812721	HIP1R	0.0243249	-1.08493
ILMN_1684663	ZDHHC13	0.0126931	-1.08495
ILMN_1710315	NOS1AP	0.0198406	-1.08505
ILMN_1764945	AP3D1	0.0413325	-1.08506
ILMN_1815086	NINJ1	0.0120749	-1.08514
ILMN_1767324	EIF4EBP1	0.024756	-1.08515
ILMN_1791467	LOC440503	0.00127421	-1.08527
ILMN_1777096	TDG	0.0175725	-1.08535
ILMN_1776105	PSPH	0.0470417	-1.08542
ILMN_1690252	ALKBH2	0.00747888	-1.08572
ILMN_1696556	KIAA0133	0.00410336	-1.08577
ILMN_1764980	SERPINA1	0.0361916	-1.08592
ILMN_1697665	LOC653972	0.0307917	-1.08594
ILMN_1770732	COPS3	0.0072503	-1.08595
ILMN_1793724	C3orf31	0.0202154	-1.08603
ILMN_1735075	PGBD2	0.0211555	-1.0862
ILMN_1768393	SNRPD1	0.00300438	-1.08635
ILMN_1655702	ABHD5	0.0406428	-1.08648
ILMN_1701289	MGC40489	0.00763752	-1.0865
ILMN_1664682	DNA2L	0.000153624	-1.08668
ILMN_1760933	PEX10	0.017937	-1.08669
ILMN_1680501	GTF2IRD2	0.0297743	-1.08678
ILMN_1761844	ZCCHC17	0.00420589	-1.08685
ILMN_1780671	PLEKHG3	0.0167649	-1.08689
ILMN_1701243	C10orf2	0.000847418	-1.08707
ILMN_1762275	CSE1L	0.000543682	-1.08719
ILMN_1719471	MSH3	0.0368922	-1.0874
ILMN_1661627	LZIC	0.0262409	-1.08741
ILMN_1651628	EXOC6	0.0188051	-1.08745
ILMN_1651987	C6orf129	0.0370191	-1.08747
ILMN_1745116	C20orf22	0.0223249	-1.08748
ILMN_1799367	TXNDC14	0.0465178	-1.08752
ILMN_1707021	LOC643293	0.0175576	-1.08759
ILMN_1658327	BAZ1A	0.0165309	-1.08762
ILMN_1682494	RSRC1	0.0457545	-1.08764
ILMN_1810474	UBE2I	0.00104027	-1.0879
ILMN_1733164	FBXO11	6.01135e-05	-1.08799
ILMN_1674662	C15orf42	4.93037e-06	-1.08818
ILMN_1680139	MAFF	0.00555609	-1.08824
ILMN_1811955	PRMT5	0.0191815	-1.08838
ILMN_1709948	LOC651453	0.0208695	-1.08838
ILMN_1746206	AZI1	0.0228503	-1.0885
ILMN_1727050	PPFIA1	0.000543682	-1.08878
ILMN_1724863	TICAM1	0.00768997	-1.08902
ILMN_1754045	FANCL	0.0250508	-1.08911
ILMN_1729509	C1orf43	0.0350535	-1.08936
ILMN_1653613	PIGO	0.00512279	-1.08938
ILMN_1706246	CCT5	0.0162648	-1.08943
ILMN_1790625	CBX3	0.0383686	-1.08952
ILMN_1778238	UTP6	0.0426323	-1.08957
ILMN_1699859	GNPAT	0.0461732	-1.08972
ILMN_1696133	SELI	0.0425682	-1.08982
ILMN_1707763	ST7	0.0444025	-1.08984
ILMN_1672042	DOLPP1	0.00342971	-1.09001
ILMN_1653496	GLUL	0.000344176	-1.09035
ILMN_1785731	MAPK8IP2	0.019078	-1.09041
ILMN_1782129	ZBED4	0.0149261	-1.0906
ILMN_1680251	SORCS1	0.0186208	-1.09081
ILMN_1805590	LSM8	0.020468	-1.09092
ILMN_1792672	POLR2D	0.00534585	-1.09102
ILMN_1800619	BRI3BP	4.48446e-06	-1.09121
ILMN_1772074	LOC352909	0.0113846	-1.09125
ILMN_1770936	COQ5	0.0306344	-1.09126
ILMN_1661776	CENPJ	0.0116633	-1.09149
ILMN_1803624	TMEM147	0.0246179	-1.09156
ILMN_1669842	CHAF1A	0.00460479	-1.0917
ILMN_1722309	ENDOG	0.0315205	-1.09203
ILMN_1771149	MRPL19	0.0458583	-1.09215
ILMN_1772329	LRRFIP2	0.0138686	-1.09216
ILMN_1659857	SNAP29	0.046109	-1.09225
ILMN_1765401	RRN3	0.0492454	-1.09272
ILMN_1703692	LOC647000	0.0325766	-1.09275
ILMN_1696330	GUF1	0.00794859	-1.09289
ILMN_1797933	MRPL17	0.0125228	-1.09296
ILMN_1743100	TNFRSF18	0.000477089	-1.09299
ILMN_1655307	FAM136A	0.0087118	-1.09331
ILMN_1761113	GNL2	0.0103192	-1.09334
ILMN_1725666	GTF2H3	0.0102868	-1.09364
ILMN_1686920	CCDC58	0.0187306	-1.09365
ILMN_1779213	TFG	0.0106841	-1.09371
ILMN_1797318	HSPA14	0.00875756	-1.09378
ILMN_1794046	MTX2	0.0388129	-1.09384
ILMN_1710738	RC3H2	0.0291662	-1.09401
ILMN_1757317	LARS	0.0116091	-1.09421
ILMN_1669394	EI24	0.0224121	-1.09456
ILMN_1659343	BOLA2	0.0254865	-1.09489
ILMN_1772786	KIF16B	0.0465659	-1.09498
ILMN_1693985	JPH1	0.00752732	-1.09499
ILMN_1695357	FLJ20364	0.00126724	-1.09503
ILMN_1750785	SYTL1	0.0282173	-1.09512
ILMN_1723117	IPO9	0.0410254	-1.09514
ILMN_1728975	SCO1	0.0405743	-1.09533
ILMN_1699644	2003-03-01	0.0151758	-1.09534
ILMN_1773935	TMEM165	0.0439051	-1.09546
ILMN_1790354	RABGGTB	0.0153129	-1.09554
ILMN_1797191	KIAA0040	0.0201667	-1.09562
ILMN_1739683	LRRC6	0.0162648	-1.09572
ILMN_1675460	LOC283412	0.020091	-1.09576
ILMN_1800958	ALS2CR4	0.0152842	-1.09577
ILMN_1811933	SHMT1	0.0188675	-1.09579
ILMN_1680130	DYM	0.0492383	-1.09587
ILMN_1690122	CRKL	0.0280878	-1.09588
ILMN_1722218	MBOAT7	0.0240889	-1.0959
ILMN_1687359	MRPS23	0.043641	-1.09591
ILMN_1800445	NEK10	0.000248875	-1.09595
ILMN_1781281	EPPB9	0.00532549	-1.09595
ILMN_1655796	2003-03-01	0.00972891	-1.09605
ILMN_1673073	WDR62	0.00116177	-1.09627
ILMN_1715636	EIF3S9	0.0142941	-1.09634
ILMN_1686194	SDCCAG10	0.0295979	-1.09669
ILMN_1664833	MRPL50	0.0470657	-1.09673
ILMN_1802157	THOC1	0.0318782	-1.09674
ILMN_1673991	ATIC	0.0256391	-1.09687
ILMN_1806906	SSR3	0.00379102	-1.097
ILMN_1692790	ITGB3BP	0.00744502	-1.09704
ILMN_1797693	BRI3BP	0.0315243	-1.09712
ILMN_1742569	PAPD1	0.015065	-1.09713
ILMN_1744963	ERO1L	0.0493316	-1.09721
ILMN_1765684	C19orf70	0.0087118	-1.09722
ILMN_1681998	AP2B1	0.0381045	-1.09727
ILMN_1743783	CCDC43	0.000604298	-1.09741
ILMN_1676555	TTC26	0.00143683	-1.09746
ILMN_1766951	MSX2	0.0268835	-1.09765
ILMN_1671028	THRAP3	0.00522219	-1.09771
ILMN_1658678	SAAL1	0.00752594	-1.09777
ILMN_1778890	PPIL5	0.00263952	-1.09784
ILMN_1722239	TIMM8A	0.00634335	-1.09788
ILMN_1688953	ARHGAP19	0.00834057	-1.09797
ILMN_1775965	KIAA1622	0.00118832	-1.09799
ILMN_1672149	CHCHD1	0.038794	-1.09802
ILMN_1680967	CIP29	0.00872062	-1.09834
ILMN_1657949	RHEB	0.0468944	-1.09839
ILMN_1813175	LPHN1	0.0370191	-1.09844
ILMN_1701457	FAHD1	0.0465103	-1.09846
ILMN_1716859	TDO2	0.0208909	-1.09852
ILMN_1719205	FBL	0.00892492	-1.09868
ILMN_1700887	TDRD5	0.0233726	-1.09878
ILMN_1810922	PCNT2	0.0299071	-1.0989
ILMN_1719224	C17orf45	0.0267788	-1.09894
ILMN_1689525	PMAIP1	1.51338e-05	-1.09937
ILMN_1754178	GDI2	0.0441399	-1.09939
ILMN_1695491	C8orf32	0.0101086	-1.09949
ILMN_1679555	TIMM23	0.00272933	-1.09975
ILMN_1673111	TSEN34	0.0351841	-1.0998
ILMN_1675421	LOC389293	0.0160002	-1.09988
ILMN_1808219	FLJ20718	0.00241758	-1.09993
ILMN_1706149	PDCD2L	0.00693012	-1.10011
ILMN_1716730	FAM44B	0.0127301	-1.10013
ILMN_1716441	SNORD4A	0.0145828	-1.1003
ILMN_1761939	TIPIN	1.51027e-05	-1.1004
ILMN_1797209	TSGA14	0.00420589	-1.1004
ILMN_1746699	SGOL2	1.59979e-05	-1.10066
ILMN_1683305	COMMD2	0.0120403	-1.1007
ILMN_1736441	PDXP	0.028407	-1.10084
ILMN_1755134	HSPA4	0.0113504	-1.10085
ILMN_1689665	NAE1	0.00659486	-1.1009
ILMN_1730612	C20orf35	0.015756	-1.10116
ILMN_1704477	COX5A	0.0223595	-1.10119
ILMN_1722127	RAD54B	3.25151e-05	-1.10124
ILMN_1769931	SFPQ	0.00237254	-1.10149
ILMN_1769634	STRA13	0.0395554	-1.10152
ILMN_1726647	LOC644928	0.0350535	-1.10165
ILMN_1704672	OBFC2B	0.00556736	-1.10166
ILMN_1673962	NUP205	0.0278656	-1.10169
ILMN_1795838	C4orf19	0.00577195	-1.10198
ILMN_1741585	SFMBT1	0.00162467	-1.10224
ILMN_1813389	MRPS7	0.0148922	-1.10231
ILMN_1694219	ARIH1	0.0148858	-1.10239
ILMN_1815124	CHCHD2	0.0401422	-1.10242
ILMN_1696311	IMPAD1	0.0305014	-1.10251
ILMN_1673711	HSP90AB1	0.0131856	-1.1026
ILMN_1743232	MICALCL	0.0027144	-1.10279
ILMN_1741957	RABEPK	0.00710691	-1.10293
ILMN_1726659	THOP1	0.0430628	-1.10295
ILMN_1806951	CSTF3	0.00522338	-1.10328
ILMN_1769757	C14orf104	0.029681	-1.10333
ILMN_1656134	CNOT7	0.0425141	-1.10342
ILMN_1780283	LOC198437	0.0016725	-1.10351
ILMN_1681221	C9orf100	8.64432e-05	-1.10354
ILMN_1737535	TAF4	0.0244955	-1.10357
ILMN_1710668	LETM1	0.0026643	-1.10361
ILMN_1673649	HYOU1	0.00921512	-1.10361
ILMN_1661264	SHMT2	0.0200761	-1.10367
ILMN_1782403	PRR11	0.000802293	-1.10371
ILMN_1750102	EME1	3.34795e-05	-1.10372
ILMN_1729179	SPATA5L1	0.00822768	-1.10375
ILMN_1882519		0.00320878	-1.10385
ILMN_1756352	MAPBPIP	0.0133023	-1.10388
ILMN_1662147	MANEAL	0.000999851	-1.10396
ILMN_1660775	TPM3	0.000192669	-1.1041
ILMN_1671265	ING2	0.0325766	-1.10411
ILMN_1707240	PTBP2	0.0110266	-1.10416
ILMN_1693430	NME1-NME2	0.00584076	-1.10418
ILMN_1697267	PRKCZ	0.0102024	-1.10433
ILMN_1683441	NCAPD3	0.000155568	-1.10466
ILMN_1784860	RFC3	0.000518922	-1.10468
ILMN_1781999	ABCF2	0.0244585	-1.10486
ILMN_1776582	PDK3	0.0102868	-1.10491
ILMN_1660079	RNF44	0.00532549	-1.10509
ILMN_1744980	ZCCHC7	0.0462223	-1.10519
ILMN_1683250	LOC440731	0.0146563	-1.10524
ILMN_1705861	AP1M2	0.0428424	-1.10524
ILMN_1756402	TMEM177	0.00222565	-1.10526
ILMN_1789349	UBQLN4	0.0451049	-1.10537
ILMN_1772207	LOC653377	0.0323086	-1.10541
ILMN_1653432	HNRPDL	0.0468944	-1.10544
ILMN_1815303	FAM82B	0.0194525	-1.10552
ILMN_1764163	LOC644330	0.0161451	-1.10557
ILMN_1898124		0.0246179	-1.10579
ILMN_1757697	NEIL3	2.64074e-06	-1.10595
ILMN_1787762	HEATR1	0.0225953	-1.106
ILMN_1806149	C16orf74	0.000411303	-1.10614
ILMN_1758939	RIPK2	0.0171354	-1.10616
ILMN_1782635	YARS2	0.0271918	-1.1062
ILMN_1718354	INTS7	0.00138921	-1.10622
ILMN_1796210	PPRC1	0.00542974	-1.10645
ILMN_1712386	C21orf45	0.0040446	-1.10647
ILMN_1789283	PPP2R5C	0.040352	-1.10648
ILMN_1795341	SFRS1	0.00152884	-1.10657
ILMN_1814122	MDC1	0.029582	-1.10671
ILMN_1686082	C14orf79	0.0113236	-1.10689
ILMN_1683959	MED13L	0.00432225	-1.10699
ILMN_1799028	TSPAN5	0.0402229	-1.10704
ILMN_1780444	ARL3	0.00494638	-1.10709
ILMN_1798030	XPR1	0.0318782	-1.10712
ILMN_1701514	TRAF3IP2	0.0142911	-1.1072
ILMN_1739805	NDE1	0.00720405	-1.10727
ILMN_1723522	APOLD1	0.0127664	-1.10727
ILMN_1800837	CFDP1	0.0267493	-1.10752
ILMN_1680193	PAXIP1	0.0402618	-1.10767
ILMN_1669983	RGS22	0.00744502	-1.10773
ILMN_1698996	SLC19A1	0.000779043	-1.10776
ILMN_1749709	NDUFB11	0.00033803	-1.10779
ILMN_1676423	CCNC	0.0428419	-1.10788
ILMN_1774661	SNRPB	0.0196789	-1.10798
ILMN_1702806	PDCL3	0.000999851	-1.10807
ILMN_1768470	EIF4G1	0.0210473	-1.10808
ILMN_1814282	ISG20L1	0.00342685	-1.10812
ILMN_1815874	NANS	0.011991	-1.10819
ILMN_1685112	CCDC44	0.00384002	-1.10822
ILMN_1758104	PRPS2	0.0225865	-1.10833
ILMN_1654690	CECR5	0.0317116	-1.10833
ILMN_1779353	PUS7	0.00488498	-1.10835
ILMN_1713679	DSU	2.23742e-05	-1.10841
ILMN_1733863	FAM100A	0.00836068	-1.10846
ILMN_1744649	PSMB5	0.00940675	-1.10864
ILMN_1757644	UBE2H	0.0478205	-1.10869
ILMN_1675677	TMPRSS3	0.0121063	-1.10872
ILMN_1790461	C6orf125	0.0208909	-1.10881
ILMN_1760506	LOC158160	0.000287703	-1.10888
ILMN_1729167	EFTUD1	0.00217378	-1.10895
ILMN_1661622	TBC1D7	0.0223595	-1.10902
ILMN_1677887	PMS2	0.00474461	-1.10907
ILMN_1787657	CLDN12	0.0391573	-1.10908
ILMN_1724293	KDELR2	0.0324799	-1.10909
ILMN_1682098	PSMA4	0.0335647	-1.10917
ILMN_1701077	C21orf127	0.0124314	-1.10946
ILMN_1734827	MKI67	7.2133e-06	-1.11002
ILMN_1764794	PSMB2	0.00476871	-1.11007
ILMN_1797660	NXNL2	2.66557e-05	-1.11023
ILMN_1776674	SAC3D1	0.017526	-1.11031
ILMN_1722900	EIF4A1	0.00243765	-1.11032
ILMN_1689800	C1orf33	0.00202426	-1.11087
ILMN_1813840	AOF2	0.0341931	-1.11094
ILMN_1663751	CYCSL1	0.042085	-1.11125
ILMN_1681890	DYNLT3	0.0439631	-1.11138
ILMN_1746393	TSEN2	0.00368432	-1.11141
ILMN_1720799	GPSN2	0.0114537	-1.11165
ILMN_1718972	MFSD3	0.0416095	-1.11166
ILMN_1697736	EXOSC2	0.0013568	-1.11176
ILMN_1687858	CALM2	0.040696	-1.11187
ILMN_1758750	EARS2	0.00626716	-1.11202
ILMN_1729973	ZC3HAV1	0.00203224	-1.11208
ILMN_1754865	PABPC4	0.0187854	-1.11215
ILMN_1736176	PLK1	1.37253e-06	-1.11219
ILMN_1681591	PTPN1	0.01777	-1.11221
ILMN_1771620	SNRPB2	0.012899	-1.11228
ILMN_1663954	TH1L	0.00191598	-1.11249
ILMN_1734486	C1orf19	0.0368188	-1.11255
ILMN_1737195	FKSG14	6.412e-05	-1.11267
ILMN_1755727	JARID1B	0.0399584	-1.11274
ILMN_1729650	PEX7	0.0465103	-1.11284
ILMN_1732809	ALG9	0.00316812	-1.11299
ILMN_1717745	TIAL1	0.0245941	-1.11307
ILMN_1745282	RAGE	0.0334701	-1.11315
ILMN_1693766	CEP135	0.0087118	-1.11318
ILMN_1706386	SLC39A4	0.0116196	-1.11321
ILMN_1686553	INTS2	0.00800538	-1.11335
ILMN_1742813	MGC23909	0.0194934	-1.11345
ILMN_1719883	CYP4F11	0.00121341	-1.11352
ILMN_1809477	CARHSP1	0.039463	-1.11383
ILMN_1820244		0.00172797	-1.11424
ILMN_1771264	ELL3	0.00744502	-1.1143
ILMN_1803997	SDCCAG3	0.00557929	-1.11455
ILMN_1778917	CDK7	0.0163228	-1.11459
ILMN_1709484	BLM	4.26137e-06	-1.1148
ILMN_1672128	ATF4	0.0194353	-1.11498
ILMN_1732717	FAM71E1	0.000405446	-1.11512
ILMN_1759729	NDUFA8	0.0493687	-1.11516
ILMN_1678037	HIRIP3	0.00763752	-1.11533
ILMN_1701134	PTEN	0.0205772	-1.1155
ILMN_1712718	BPNT1	0.0205342	-1.11555
ILMN_1804812	ANAPC1	0.00211856	-1.11569
ILMN_1669064	HSZFP36	0.0030995	-1.1157
ILMN_1740418	CYP27B1	0.0385294	-1.11588
ILMN_1724837	ZC3HAV1	0.0067444	-1.11618
ILMN_1701131	C2orf49	0.000227662	-1.11623
ILMN_1730825	SGOL1	1.7456e-06	-1.11631
ILMN_1780298	FAM86A	0.00129182	-1.11638
ILMN_1655765	MRPS21	0.048731	-1.1164
ILMN_1683916	PEX13	0.00372478	-1.11644
ILMN_1678669	RRM2	0.000198077	-1.11646
ILMN_1783337	DECR2	0.0143559	-1.11652
ILMN_1797425	DDX55	0.0392017	-1.1166
ILMN_1799819	MARS	0.000400794	-1.11663
ILMN_1772487	SFRS14	0.00314743	-1.11681
ILMN_1774028	MTFR1	0.0391273	-1.11707
ILMN_1677509	PRR7	0.00300438	-1.11709
ILMN_1811470	PLEK2	0.000119113	-1.11724
ILMN_1759952	PSMA5	0.0426323	-1.1174
ILMN_1750661	FBXW9	0.00106408	-1.11745
ILMN_1689001	CDK4	0.0381184	-1.11757
ILMN_1753243	DNAJB11	0.00687052	-1.11791
ILMN_1757384	RAN	0.00763752	-1.11826
ILMN_1710954	LOC283932	0.00752594	-1.11828
ILMN_1738681	NUP62	0.0385294	-1.11845
ILMN_1796417	ASNS	0.0144879	-1.11854
ILMN_1658821	SAMD1	0.00347074	-1.1186
ILMN_1718633	LRP5L	0.012402	-1.1186
ILMN_1812489	CCDC21	6.43531e-05	-1.11866
ILMN_1651872	UBIAD1	0.000997621	-1.11868
ILMN_1763884	Magmas	0.0085702	-1.1188
ILMN_1724497	ABI2	0.0129631	-1.11907
ILMN_1664369	DHTKD1	0.000627955	-1.11929
ILMN_1802355	RBM18	0.0102097	-1.11936
ILMN_1814589	KIF22	0.0214285	-1.11944
ILMN_1653553	C14orf80	0.0156272	-1.11948
ILMN_1771411	ALG6	0.0224323	-1.11953
ILMN_1802377	IQCG	0.00250038	-1.11956
ILMN_1742230	BAZ1A	0.0180907	-1.12012
ILMN_1748427	ZNF239	0.0415291	-1.12013
ILMN_1736527	TFCP2L1	0.00168502	-1.12017
ILMN_1808305	RTCD1	0.0320674	-1.12067
ILMN_1705301	TEAD4	0.00552639	-1.12126
ILMN_1767481	XRCC6BP1	0.00117834	-1.1216
ILMN_1714433	MARCKSL1	0.028015	-1.12165
ILMN_1748476	NOP5/NOP58	0.018037	-1.12167
ILMN_1758067	RGS4	0.0264875	-1.12185
ILMN_1712678	RPS27L	0.0194353	-1.12189
ILMN_1914933		1.51027e-05	-1.12193
ILMN_1744240	WDR67	0.000131237	-1.12239
ILMN_1696266	XRCC3	1.45952e-06	-1.1224
ILMN_1786469	FBXO22	0.00487978	-1.12241
ILMN_1761456	ALG13	0.0437728	-1.12268
ILMN_1691436	BLVRA	0.0433983	-1.12271
ILMN_1737517	RPL29	0.00659486	-1.12275
ILMN_1756755	LINGO1	0.0309773	-1.12283
ILMN_1748819	MRPL22	0.00263952	-1.12288
ILMN_1739297	GALNT4	0.0170907	-1.12315
ILMN_1343295	GAPDH	0.0106841	-1.12368
ILMN_1669635	NUP85	0.000355014	-1.12385
ILMN_1681737	TMSL8	0.0020944	-1.12396
ILMN_1667577	LCMT2	0.0335957	-1.1241
ILMN_1770678	CBX2	0.0187854	-1.12417
ILMN_1741350	CEP70	0.00227211	-1.12432
ILMN_1678095	SMPDL3B	0.0149278	-1.12434
ILMN_1656145	GOT1	0.000458699	-1.1245
ILMN_1773200	CP110	0.0110956	-1.12452
ILMN_1699737	TRAP1	0.00111364	-1.12453
ILMN_1691641	CITED1	0.0329443	-1.12478
ILMN_1812474	TFG	0.0423453	-1.1249
ILMN_1767219	POLR1C	0.00185726	-1.12508
ILMN_1667432	HYAL3	0.000132725	-1.12518
ILMN_1769118	2009-09-01	0.00426888	-1.12534
ILMN_1762095	TMTC4	0.00228181	-1.1254
ILMN_1678423	SPA17	0.00743222	-1.12548
ILMN_1717326	SLC29A3	0.00385256	-1.12549
ILMN_1693836	LOC653344	0.0207447	-1.12574
ILMN_1704164	ATP13A2	0.0235359	-1.12593
ILMN_1746686	POLR1C	0.00148738	-1.12603
ILMN_1670817	GRPEL1	0.030046	-1.12605
ILMN_1660533	RPN1	0.000699891	-1.12609
ILMN_1745154	PARD6B	3.83911e-05	-1.12625
ILMN_1760280	NXT1	0.0077824	-1.12639
ILMN_1874530		4.2131e-06	-1.12646
ILMN_1679476	GART	0.000998149	-1.12686
ILMN_1662198	RANGAP1	6.81497e-05	-1.12693
ILMN_1690844	DNAJB6	0.0432502	-1.12705
ILMN_1658289	WDR54	0.0183898	-1.12717
ILMN_1723709	C9orf116	0.0349868	-1.12719
ILMN_1659953	2003-09-01	0.00057752	-1.12736
ILMN_1661717	TFDP1	0.0397147	-1.12737
ILMN_1726306	HMBS	0.000961751	-1.1279
ILMN_1801118	C16orf33	0.00542394	-1.12819
ILMN_1763196	WDR72	0.00125509	-1.12827
ILMN_1801504	RUNX1	0.0238272	-1.12827
ILMN_1676846	ABCE1	0.029132	-1.12839
ILMN_1743714	CARD10	0.000444241	-1.12847
ILMN_1683664	FAM60A	0.0153485	-1.12847
ILMN_1701855	PPP1CC	0.0153496	-1.12889
ILMN_1736597	TKT	0.0214693	-1.12894
ILMN_1662426	AP2S1	0.0257796	-1.12936
ILMN_1673522	MOCOS	9.85437e-05	-1.12942
ILMN_1873621		0.00113333	-1.12974
ILMN_1742779	CENPL	0.000174182	-1.12983
ILMN_1733374	FAM82B	0.0127301	-1.12993
ILMN_1665483	KIAA0020	0.00636336	-1.12995
ILMN_1654773	CASK	0.0480686	-1.13031
ILMN_1750722	RPS7	0.00468378	-1.13076
ILMN_1781479	SUV39H1	5.63769e-05	-1.1308
ILMN_1815682	C3orf37	0.00272933	-1.13081
ILMN_1672589	SEMA4B	0.0335241	-1.13111
ILMN_1813766	RCL1	0.000504827	-1.13112
ILMN_1678775	NPM1	0.0288785	-1.13116
ILMN_1749875	LOC440080	0.00853197	-1.13143
ILMN_1791576	CHSY1	0.0421403	-1.13152
ILMN_1804735	CBS	0.00758796	-1.13158
ILMN_1774844	MAPKAPK2	0.00253815	-1.13179
ILMN_1731194	STRAP	0.0381184	-1.13186
ILMN_1659725	EXOSC5	0.000175304	-1.13205
ILMN_1859946		0.0371079	-1.13206
ILMN_1758658	FADD	0.00168277	-1.13218
ILMN_1707337	MSTO1	0.0190765	-1.13241
ILMN_1738767	PLP2	0.0046187	-1.13242
ILMN_1733377	FASTKD5	0.00744502	-1.13255
ILMN_1791656	C10orf137	0.0046994	-1.13258
ILMN_1786189	MKI67IP	0.0200591	-1.13268
ILMN_1694233	ACYP1	0.00203077	-1.13269
ILMN_1745946	CCDC5	0.000957586	-1.13272
ILMN_1657204	SAE1	5.63923e-05	-1.13284
ILMN_1753249	DDX10	1.59979e-05	-1.13287
ILMN_1756685	DEPDC6	0.0371535	-1.13291
ILMN_1678049	FGB	0.0298598	-1.13294
ILMN_1750636	LOC643516	0.00638317	-1.13357
ILMN_1812776	FBXO28	0.0191967	-1.13366
ILMN_1748827	LOC388564	0.0494057	-1.1337
ILMN_1755834	FEN1	0.00317082	-1.13381
ILMN_1709809	NHP2L1	0.0427454	-1.13394
ILMN_1654287	ADCY9	0.00138987	-1.13396
ILMN_1737685	CRLS1	0.0433881	-1.13421
ILMN_1661809	PRRG4	0.000215792	-1.13423
ILMN_1803773	MAG	0.000215234	-1.13431
ILMN_1758629	DONSON	2.02068e-05	-1.13445
ILMN_1731619	DAD1	0.00752732	-1.13448
ILMN_1749821	MED28	0.0096556	-1.13488
ILMN_1740234	GSTO2	0.0335647	-1.13499
ILMN_1762594	NOD2	0.00127421	-1.13512
ILMN_1805028	THOC7	0.0154921	-1.13517
ILMN_1749930	TMEM48	1.57809e-05	-1.13524
ILMN_1671906	MND1	3.8886e-05	-1.13548
ILMN_1743711	XPOT	0.0271221	-1.13578
ILMN_1796013	PYCR1	0.0188541	-1.1359
ILMN_1652580	POLD1	0.00186471	-1.13618
ILMN_1656540	RUVBL1	0.00186397	-1.13622
ILMN_1810680	BOLA2	0.0012526	-1.1363
ILMN_1756550	NUP62CL	0.00136232	-1.13641
ILMN_1785198	POLE3	0.020468	-1.13643
ILMN_1722502	CCT6A	0.00301107	-1.13648
ILMN_1761486	C13orf34	0.000119692	-1.13657
ILMN_1707484	GEMIN6	0.0011426	-1.13677
ILMN_1743199	EGR2	0.0452544	-1.13703
ILMN_1688971	NOL11	0.0028832	-1.13717
ILMN_1682792	BYSL	3.19838e-05	-1.13721
ILMN_1747303	DDX39	6.41921e-05	-1.13728
ILMN_1891067		0.0019223	-1.13735
ILMN_1694502	PRIM1	0.00062728	-1.13754
ILMN_1680727	GLRX2	0.00618137	-1.13757
ILMN_1778561	WEE1	0.0304601	-1.13787
ILMN_1705753	C3orf26	0.00107316	-1.13791
ILMN_1682336	MASTL	1.42428e-07	-1.13792
ILMN_1664231	TIMM23	0.014691	-1.13795
ILMN_1685413	ALG8	0.000399346	-1.13809
ILMN_1710428	CDC2	0.000174612	-1.13823
ILMN_1736816	C13orf3	2.76229e-06	-1.13837
ILMN_1673941	RBM24	2.18384e-05	-1.13839
ILMN_1760954	DENR	0.00639556	-1.13845
ILMN_1737396	PSMD14	0.0332753	-1.13903
ILMN_1704055	HSPC111	2.96717e-05	-1.13904
ILMN_1714759	CNIH4	0.0160338	-1.13909
ILMN_1677138	POLR2J3	0.0416095	-1.13919
ILMN_1711899	ANXA2	0.0461301	-1.13945
ILMN_1664283	C9orf75	0.00492813	-1.13953
ILMN_1658460	FUSIP1	0.0137231	-1.13962
ILMN_1718023	APEH	0.000428163	-1.13968
ILMN_1663664	MRPS10	0.00296535	-1.13968
ILMN_1685774	ATP5C1	0.00816555	-1.13973
ILMN_1655191	CASZ1	0.0187354	-1.13979
ILMN_1769517	PRKDC	0.000498541	-1.13993
ILMN_1669550	MAD2L2	0.00979447	-1.13994
ILMN_1675483	ANKMY1	0.0141107	-1.14017
ILMN_1726239	TBCA	0.0394495	-1.14052
ILMN_1760858	RAB8A	0.00155147	-1.14148
ILMN_1653438	PHF14	0.00892831	-1.14158
ILMN_1753183	CDCA4	3.17836e-07	-1.14196
ILMN_1808779	CSTF3	0.0250604	-1.14227
ILMN_1672961	LOC652624	0.0450217	-1.14293
ILMN_1716053	AK2	0.0113236	-1.14308
ILMN_1787680	SELS	0.0194353	-1.14314
ILMN_1777740	C8orf55	0.0031216	-1.14345
ILMN_1782897	CAPRIN1	0.00379102	-1.14346
ILMN_1666471	QP-C	0.00162839	-1.14375
ILMN_1815190	METTL1	0.00341958	-1.14379
ILMN_1671158	MRPL13	0.024756	-1.14415
ILMN_1662483	LOC652924	0.0201992	-1.14419
ILMN_1765332	TIMM10	0.000438781	-1.14424
ILMN_1678781	SNX26	0.0137231	-1.14434
ILMN_1787280	C1orf135	9.51814e-06	-1.14461
ILMN_1699022	KIAA0830	0.0162934	-1.14471
ILMN_1701293	COX7A2	0.0493254	-1.14488
ILMN_1808783	STRBP	0.0131146	-1.14496
ILMN_1736901	ZDHHC23	0.000101318	-1.14499
ILMN_1770692	WDR12	0.00387545	-1.14503
ILMN_1758474	PRKRA	0.00236475	-1.14529
ILMN_1691572	TST	0.0183264	-1.14538
ILMN_1804448	MSI2	1.0871e-05	-1.14543
ILMN_1746090	STT3A	0.02522	-1.14558
ILMN_1738027	BRCA1	1.15807e-06	-1.14564
ILMN_1695404	LY6E	0.0452544	-1.14618
ILMN_1664718	CYP51A1	0.0175576	-1.14642
ILMN_1774062	SLC25A5	0.0151132	-1.1466
ILMN_1684771	PGRMC1	0.0385294	-1.14734
ILMN_1700652	CHAD	0.0456673	-1.14742
ILMN_1715324	HSD17B8	0.00799009	-1.14746
ILMN_1717490	RPL6	0.00380704	-1.14747
ILMN_1803799	LOC649555	0.0452544	-1.14754
ILMN_1707783	CCDC72	0.010083	-1.14773
ILMN_1703949	KPNB1	0.0061376	-1.14777
ILMN_1671257	DKC1	0.000215031	-1.14786
ILMN_1674236	HSPB1	0.00158524	-1.14806
ILMN_1771224	C18orf24	5.94661e-05	-1.1481
ILMN_1708508	PPM1E	0.00137511	-1.14813
ILMN_1767747	HDAC2	0.0196274	-1.14848
ILMN_1669584	ILF3	0.025549	-1.14853
ILMN_1656628	WDR4	0.00253815	-1.14866
ILMN_1737580	FAM152B	0.00119688	-1.14888
ILMN_1721167	MYT1	0.00348558	-1.14894
ILMN_1663313	AMY1C	0.0123374	-1.14907
ILMN_1702783	LOC652595	0.0403757	-1.14921
ILMN_1748883	CDKN2D	0.00131987	-1.14931
ILMN_1718672	NOLA2	0.00231687	-1.15015
ILMN_1668507	DDAH1	0.0102024	-1.15024
ILMN_1742461	UAP1	0.0413325	-1.15027
ILMN_1808354	SLC4A7	8.24091e-05	-1.15068
ILMN_1763907	C6orf173	1.54998e-08	-1.15073
ILMN_1670542	AK2	0.00377525	-1.15073
ILMN_2038778	GAPDH	0.000127521	-1.15076
ILMN_1686871	PARP1	4.20615e-05	-1.15077
ILMN_1804652	PLEKHH3	0.0093935	-1.15091
ILMN_1751726	LOC649049	0.0347882	-1.15093
ILMN_1784655	TLCD1	0.000134598	-1.15112
ILMN_1732688	DUT	0.0148028	-1.15116
ILMN_1815500	ITPR3	0.00753538	-1.15139
ILMN_1773262	ESM1	0.0167945	-1.1517
ILMN_1755405	FRAG1	0.0193797	-1.15182
ILMN_1662158	LOC653147	0.00238508	-1.15222
ILMN_1749432	MRPL32	0.00834057	-1.15265
ILMN_1664630	CHEK1	1.31081e-06	-1.15267
ILMN_1658144	TRIP11	0.00421644	-1.15278
ILMN_1707493	RCC1	0.001029	-1.1528
ILMN_1732537	FLJ20397	2.45904e-06	-1.15281
ILMN_1691181	TXNDC	0.0272963	-1.15307
ILMN_1739274	PDHB	0.00223459	-1.15311
ILMN_1679209	HSPA9B	0.0025752	-1.15374
ILMN_1715583	BOP1	0.00274304	-1.15409
ILMN_1660654	CDCA2	3.5689e-09	-1.15487
ILMN_1741148	ALDOA	0.00735589	-1.15555
ILMN_1747078	HYLS1	2.52385e-05	-1.15561
ILMN_1700563	ZNF552	5.63805e-06	-1.15579
ILMN_1656682	AZIN1	0.0457545	-1.1559
ILMN_1760635	RAD51C	0.00803575	-1.15611
ILMN_1652445	RAC1	0.00601048	-1.15629
ILMN_1768293	NUP155	0.000174793	-1.15632
ILMN_1711314	NUDT5	0.000848069	-1.15635
ILMN_1705407	LOC642019	0.00145553	-1.15663
ILMN_1807397	NDUFB5	0.04136	-1.15678
ILMN_1897310		0.00118038	-1.15682
ILMN_1671557	PHLDA2	0.00379102	-1.15691
ILMN_1679195	C20orf24	0.0247835	-1.15704
ILMN_1700811	UBPH	4.37428e-05	-1.15712
ILMN_1685661	CGI-115	0.0106601	-1.15719
ILMN_1662334	DNAJA3	0.00820243	-1.15759
ILMN_1671693	C18orf10	0.00420589	-1.1576
ILMN_1726327	AMY1B	4.80482e-05	-1.15766
ILMN_1746171	H2AFY	0.00414489	-1.15778
ILMN_1713088	MSI2	1.72933e-06	-1.15802
ILMN_1667670	SLC25A15	6.78273e-05	-1.15818
ILMN_1715179	SNRPA1	0.00111364	-1.15825
ILMN_1808071	KIF14	3.24947e-08	-1.15827
ILMN_1672080	NR2F6	7.56214e-05	-1.15848
ILMN_1768127	EBNA1BP2	0.00105916	-1.15858
ILMN_1788462	AMD1	0.025401	-1.15859
ILMN_1712888	HSPH1	0.0285807	-1.15868
ILMN_1736939	UGCG	0.00239133	-1.15904
ILMN_1776724	LYPD6	0.00555609	-1.15913
ILMN_1707339	BTG3	0.00439289	-1.15946
ILMN_1727091	ACMSD	0.00135961	-1.1597
ILMN_1779374	AMMECR1	0.000278905	-1.15979
ILMN_1754051	RMI1	0.000196115	-1.15986
ILMN_1655498	FAM57B	0.00114986	-1.15988
ILMN_1815924	NUP107	2.84331e-05	-1.16002
ILMN_1754600	FNBP1L	0.0250355	-1.16074
ILMN_1711005	CDC25A	1.78576e-07	-1.16114
ILMN_1814173	SMARCA4	1.49682e-06	-1.16116
ILMN_1734814	HSPA4	0.00138771	-1.16117
ILMN_1705310	VEZF1	0.0054646	-1.1612
ILMN_1696407	SFRS2	0.0243932	-1.16141
ILMN_1712719	MAP7	0.0484163	-1.16144
ILMN_1745172	ILF2	0.00125976	-1.16225
ILMN_1698733	CNIH2	4.17398e-06	-1.16247
ILMN_1659437	TXNL5	0.00219344	-1.16249
ILMN_1767253	RRP12	6.99082e-05	-1.16255
ILMN_1737184	CDCA7	0.00253815	-1.16267
ILMN_1695731	TUBG1	0.000514493	-1.1636
ILMN_1774336	POLE2	6.93411e-07	-1.16406
ILMN_1689445	POLR2H	0.000107679	-1.16433
ILMN_1720438	LOC654094	0.0183404	-1.16434
ILMN_1788099	LSM4	0.00119688	-1.16477
ILMN_1710571	PAPD5	0.00271075	-1.16487
ILMN_1798804	SRPK1	0.00167373	-1.16511
ILMN_1725260	CDC25C	6.91672e-10	-1.16531
ILMN_1748770	CKAP5	6.61059e-05	-1.16534
ILMN_1694126	C9orf48	1.01234e-06	-1.16535
ILMN_1729691	SLC16A6	0.030604	-1.16557
ILMN_1697614	NHP2L1	0.0123318	-1.16565
ILMN_1740265	ACOT7	0.00589327	-1.16585
ILMN_1758613	RAPGEFL1	7.66219e-05	-1.16604
ILMN_1687235	HPN	0.0277522	-1.16619
ILMN_1662658	PUS1	4.63531e-05	-1.16624
ILMN_1791726	TUBB3	0.0398654	-1.16651
ILMN_1750130	GSPT1	0.000571891	-1.16694
ILMN_1793360	APITD1	0.00049523	-1.16729
ILMN_1768662	UCK2	5.28298e-07	-1.16733
ILMN_1708369	EPS15L1	1.24601e-07	-1.16782
ILMN_1756572	COQ2	0.000437667	-1.16793
ILMN_1793201	HAGHL	0.000267002	-1.16829
ILMN_1671843	PSRC1	1.8986e-06	-1.16849
ILMN_1680507	PPP2R2C	0.00621689	-1.16862
ILMN_1783695	EPRS	0.000419188	-1.16908
ILMN_1694533	RMND1	0.0145828	-1.16948
ILMN_1729563	UGDH	0.0438757	-1.17001
ILMN_1771903	NUP37	0.00158937	-1.17027
ILMN_1733956	IARS	0.0253523	-1.17145
ILMN_1800573	RPS21	0.000504827	-1.1719
ILMN_1727540	C1orf112	5.97165e-07	-1.17202
ILMN_1811472	KIF23	8.64031e-10	-1.17204
ILMN_1800261	TUBA1B	1.23975e-08	-1.17222
ILMN_1814281	SPC25	4.11375e-09	-1.17245
ILMN_1674032	ABCD3	0.00504546	-1.17254
ILMN_1752953	BCL2L12	4.93037e-06	-1.17284
ILMN_1759277	OIP5	6.93411e-07	-1.17313
ILMN_1673788	CDV3	0.0424198	-1.17331
ILMN_1748352	CTSL2	0.00151565	-1.17333
ILMN_1738207	CISH	0.0242849	-1.17349
ILMN_1710903	MAPT	0.000235331	-1.17383
ILMN_1759453	UQCRB	0.0179449	-1.17401
ILMN_1797861	IL6ST	7.54698e-05	-1.17402
ILMN_1712413	RPL39L	0.00126724	-1.17428
ILMN_1671791	PCK2	0.00351987	-1.17445
ILMN_1700306	OCIAD2	0.00158524	-1.17468
ILMN_1708672	ACAT2	0.00502244	-1.17486
ILMN_1770412	AHCYL1	0.00608524	-1.175
ILMN_1683120	UNG	0.000411453	-1.17524
ILMN_1689327	LOC643657	0.0299939	-1.17526
ILMN_1765578	TIPARP	0.00821905	-1.17527
ILMN_1762561	PLA2G10	0.00934429	-1.1753
ILMN_1682774	C13orf27	0.0046994	-1.17575
ILMN_1742145	ESPL1	1.56675e-07	-1.17581
ILMN_1802819	DEPDC1	1.31391e-09	-1.17593
ILMN_1700888	ENPP1	0.00138011	-1.17614
ILMN_1694603	SMARCC1	0.003367	-1.17616
ILMN_1748894	GTPBP3	0.00230319	-1.17628
ILMN_1691949	THOC3	7.47436e-05	-1.17637
ILMN_1696615	CA8	0.00399586	-1.17637
ILMN_1815745	SOX4	0.00653099	-1.1766
ILMN_1705737	IMPDH2	2.21406e-05	-1.17706
ILMN_1655011	SERF1B	0.012377	-1.17714
ILMN_1653205	C8orf59	0.0120065	-1.17733
ILMN_1714952	ZNF703	0.000101783	-1.17807
ILMN_1787026	SEC61G	0.0102868	-1.17843
ILMN_1668996	C1QBP	0.0219344	-1.17848
ILMN_1671486	HOMER2	0.00137511	-1.17899
ILMN_1756928	RTN1	0.0492383	-1.17924
ILMN_1754272	GINS3	1.39218e-07	-1.17926
ILMN_1699254	PLEKHH1	1.05272e-05	-1.17937
ILMN_1808789	MYO5C	0.00861886	-1.17943
ILMN_1725121	XPO1	0.0250604	-1.17952
ILMN_1793829	TMCO1	0.0338874	-1.1797
ILMN_1679666	SCGB3A1	0.0427745	-1.1797
ILMN_1686811	LOC402644	0.0294862	-1.18032
ILMN_1776104	NDUFS5	0.00757622	-1.18068
ILMN_1698470	SYAP1	0.00434034	-1.18117
ILMN_1767351	AR	0.0167317	-1.18153
ILMN_1653822	NEK2	8.67045e-08	-1.1817
ILMN_1791728	SLC25A25	2.19448e-05	-1.1819
ILMN_1654939	TMED2	0.0149126	-1.18218
ILMN_1713143	MRPL3	0.0118999	-1.18239
ILMN_1776577	DSCC1	0.000302993	-1.18252
ILMN_1761010	PCCB	0.00532549	-1.18302
ILMN_1732150	KIAA0101	2.76229e-06	-1.18324
ILMN_1723116	AMFR	0.00171824	-1.18335
ILMN_1725183	TBCE	0.00253815	-1.18342
ILMN_1737947	LSM5	0.000896599	-1.18415
ILMN_1807501	GINS4	1.92749e-08	-1.18423
ILMN_1720531	JMJD2B	0.000935844	-1.18532
ILMN_1795976	SFXN2	1.5206e-06	-1.18538
ILMN_1785191	TMEM14A	0.0465103	-1.18612
ILMN_1674302	PPAT	0.00032189	-1.18613
ILMN_1679482	TUBA3C	0.00089073	-1.18617
ILMN_1725773	DNAJC12	2.39197e-05	-1.1864
ILMN_1863962		0.00113333	-1.18644
ILMN_1751816	MCTS1	0.00473319	-1.18657
ILMN_1771734	GMPS	4.97022e-05	-1.18687
ILMN_1653466	HES4	0.000101474	-1.18737
ILMN_1690442	C18orf45	0.00126314	-1.18815
ILMN_1679800	BXDC2	0.00603269	-1.18815
ILMN_1675239	NDUFA7	0.000935844	-1.18818
ILMN_1749636	DNAJC22	0.000193924	-1.18841
ILMN_1691290	CELSR3	0.00197134	-1.18848
ILMN_1742577	GTPBP4	0.00194507	-1.18946
ILMN_1696713	POLA2	3.13544e-09	-1.18985
ILMN_1659610	TJP3	0.00968541	-1.19007
ILMN_1685928	WDR34	0.000479234	-1.19037
ILMN_1708728	H2AFJ	0.00129182	-1.19068
ILMN_1676665	CUEDC1	0.00021379	-1.19069
ILMN_1768004	PDCD4	0.0165298	-1.19078
ILMN_1714445	SLC6A9	0.00129182	-1.19085
ILMN_1775542	FAIM3	0.0236371	-1.19106
ILMN_1725193	IGFBP2	0.0277381	-1.19175
ILMN_1763129	XTP3TPA	0.00153441	-1.19203
ILMN_1798210	E2F7	1.31497e-09	-1.19205
ILMN_1721868	LOC643995	0.00744346	-1.19276
ILMN_1683891	TFAP2C	0.00032189	-1.19281
ILMN_1695576	MRPL24	0.0014806	-1.19295
ILMN_1655444	SERF1A	0.00338077	-1.19304
ILMN_1772286	OCIAD2	8.61999e-05	-1.19321
ILMN_1764321	ACOT4	0.000589482	-1.19336
ILMN_1714709	OLFM1	0.00129339	-1.1935
ILMN_1677237	LOC645345	0.00786444	-1.19406
ILMN_1688464	MAP6D1	4.9953e-05	-1.1944
ILMN_1727740	SYNCRIP	0.00143683	-1.19442
ILMN_1767658	RRS1	0.00352188	-1.19447
ILMN_1715905	DSN1	1.47992e-05	-1.19479
ILMN_1671207	IARS2	0.0344685	-1.19562
ILMN_1690523	LRRC20	6.86765e-06	-1.19565
ILMN_1657483	SEC23B	0.0170907	-1.19567
ILMN_1721457	RANBP1	0.00632594	-1.1957
ILMN_1672496	DNAJA1	0.00873008	-1.19592
ILMN_1685709	TMEM125	0.000920786	-1.1962
ILMN_2038776	TXN	0.0140354	-1.19628
ILMN_1780769	TUBB2C	0.00218839	-1.19663
ILMN_1684045	CDCA4	3.41118e-06	-1.19721
ILMN_1736940	HPRT1	0.00331407	-1.19726
ILMN_1716400	FOXM1	5.33491e-07	-1.19745
ILMN_1725105	EEF1E1	0.00115853	-1.19752
ILMN_1752589	C1orf37	0.00123723	-1.19769
ILMN_1760574	RAI2	0.000843038	-1.1977
ILMN_1756705	CHTF18	0.000128321	-1.1983
ILMN_1719695	NFKBIZ	0.0251837	-1.19844
ILMN_1755354	YBX2	8.32828e-05	-1.19859
ILMN_1764754	RAMP1	0.000488273	-1.19863
ILMN_1718807	SMC3	0.0150061	-1.19891
ILMN_1726516	SCRIB	0.000124237	-1.19898
ILMN_1710676	FBXO5	0.000153704	-1.19975
ILMN_1816342		0.000144329	-1.20107
ILMN_1673252	JTV1	0.000154228	-1.20111
ILMN_1679185	LEF1	0.00960113	-1.20123
ILMN_1741768	TMPRSS3	0.00199368	-1.20158
ILMN_1810228	TTF2	2.70656e-09	-1.20163
ILMN_1664511	NDC80	2.62167e-07	-1.20165
ILMN_1679280	LOC643997	0.0128429	-1.2019
ILMN_1662038	LARGE	0.00061121	-1.20202
ILMN_1745021	SLC30A1	3.43338e-05	-1.20219
ILMN_1655614	DSP	0.0392017	-1.20247
ILMN_1660847	PFKFB3	2.58137e-05	-1.2026
ILMN_1719599	SYTL4	0.000724819	-1.20349
ILMN_1655884	ATP2A2	0.019078	-1.20388
ILMN_1676191	DARS2	3.6668e-05	-1.20444
ILMN_1795845	CHST8	6.21343e-05	-1.20535
ILMN_1762883	MGC2408	2.25887e-05	-1.20549
ILMN_1803691	ARTN	1.17173e-10	-1.2055
ILMN_1804851	MRPS17	3.43338e-05	-1.20551
ILMN_1693145	BUB3	3.58013e-09	-1.20569
ILMN_1741406	HOOK1	0.00101481	-1.20739
ILMN_1866954		9.92451e-06	-1.20771
ILMN_1654212	FLJ33718	1.07121e-06	-1.20879
ILMN_1698185	LOC197336	0.000287703	-1.20921
ILMN_1739374	NKAIN1	3.58306e-08	-1.20924
ILMN_1659189	C9orf89	5.91798e-07	-1.20958
ILMN_1696485	HNRNPAB	0.00135521	-1.21031
ILMN_1805827	PPA1	0.0278042	-1.21033
ILMN_1658695	CDCA1	1.46377e-11	-1.21037
ILMN_1661778	MTL5	1.27483e-08	-1.21101
ILMN_1776260	PPIAL4	0.0134917	-1.21105
ILMN_1678966	SNRPF	0.00365792	-1.21121
ILMN_1799516	DNAJC9	1.34281e-06	-1.2113
ILMN_1687867	LOC647954	0.0256391	-1.21298
[truncated: 275 more rows]

## Sheet: ED vs C (IN VITRO PROBES=3046)
Illumina Probe ID	Gene Symbol	Corrected p-value (48H DCC vs. 48H E2)	Fold-Change (48H DCC vs. 48H E2)
ILMN_1770338	TM4SF1	0.000233014	7.79396
ILMN_1801442	KRT81	0.000238846	7.59815
ILMN_1677814	ABCC3	8.88979e-05	5.38597
ILMN_1781388	PGM5	0.000131742	4.94167
ILMN_1709590	PGM5	9.76771e-05	4.66738
ILMN_1791147	YPEL3	3.35315e-06	4.50402
ILMN_1659047	HIST2H2AA3	3.11155e-05	4.28375
ILMN_1694548	ANXA3	0.000214214	3.84276
ILMN_1676663	TNFRSF11B	0.000490697	3.79764
ILMN_1752813	UGT1A6	0.00179561	3.70571
ILMN_1712522	CEACAM6	9.76771e-05	3.39477
ILMN_1756541	MXD4	0.000546723	3.22857
ILMN_1667893	TNS3	8.88979e-05	3.21985
ILMN_1775743	BTG1	0.00195929	3.21129
ILMN_1706390	UGT1A6	0.00350099	3.1886
ILMN_1798360	CXCR7	8.88979e-05	3.17172
ILMN_1687652	TGFB3	0.000367177	3.13918
ILMN_1837428		0.000322396	3.08833
ILMN_1736670	PPP1R3C	0.000558441	3.0812
ILMN_1711069	YPEL5	0.00092951	3.06035
ILMN_1651496	HIST1H2BD	5.03235e-05	3.01684
ILMN_1800787	RFTN1	8.57232e-05	2.8676
ILMN_1740276	CLDN9	0.00072135	2.81822
ILMN_1680110	C10orf116	0.000357983	2.81467
ILMN_1750324	IGFBP5	0.000145026	2.7965
ILMN_1714108	TP53INP1	0.00101586	2.74629
ILMN_1769546	RIN2	0.000255471	2.72282
ILMN_1808404	RHBDF1	0.000692684	2.70669
ILMN_1672022	EPHA4	0.000384832	2.69936
ILMN_1728049	S100A16	0.00125181	2.6407
ILMN_1814213	PQLC3	0.00100127	2.63707
ILMN_1705814	KRT80	0.00149604	2.62908
ILMN_1763666	ALDH3B2	0.000692009	2.62468
ILMN_1797585	MYO1B	0.000549901	2.61614
ILMN_1810864	PMP22	0.00322945	2.61596
ILMN_1651964	ABCC5	0.000703835	2.61248
ILMN_1785646	PMP22	0.000969725	2.61102
ILMN_1674817	C1orf115	0.00125391	2.60003
ILMN_1781374	TUFT1	0.000407871	2.59911
ILMN_1748124	TSC22D3	0.00169434	2.58857
ILMN_1659990	C7orf68	0.000570087	2.53507
ILMN_1754969	LMCD1	0.000397076	2.52268
ILMN_1774901	GDPD3	0.00182801	2.49487
ILMN_1675656	PPFIBP2	0.000188899	2.48158
ILMN_1671365	PRODH	0.000214214	2.44654
ILMN_1732071	HIST2H2BE	0.0018337	2.4408
ILMN_1795835	LOC338758	0.000322396	2.4288
ILMN_1708016	C20orf108	0.000322396	2.42292
ILMN_1735877	EFEMP1	0.00158656	2.42051
ILMN_1756417	ANKRD37	8.47636e-05	2.40447
ILMN_1673409	MGC16121	0.00109333	2.39703
ILMN_1724686	CLDN1	0.000367177	2.3753
ILMN_1777342	PREX1	0.000613269	2.36363
ILMN_1758672	FAM107B	0.000115054	2.35541
ILMN_1782057	ATP8B2	0.000546723	2.34499
ILMN_1668194	LMTK3	0.00055342	2.32405
ILMN_1680652	SELENBP1	0.00602708	2.32348
ILMN_1717056	TXNRD1	0.000570087	2.32275
ILMN_1654118	BCL2L1	0.000557336	2.31511
ILMN_1703531	S1PR3	0.00135458	2.29528
ILMN_1770084	TACC1	0.000395693	2.28371
ILMN_1708934	ADM	0.000432215	2.2719
ILMN_1655637	UPK1A	0.000902817	2.27159
ILMN_1684873	ARSD	0.000233014	2.26617
ILMN_1794863	CAMK2N1	4.91145e-05	2.25913
ILMN_1740426	RASD1	0.00104408	2.23582
ILMN_1655261	ERP27	8.47636e-05	2.22313
ILMN_1696731	LOC652683	0.00278126	2.21711
ILMN_1688775	METRNL	0.00011631	2.21234
ILMN_1794782	ABCG1	0.00280929	2.21181
ILMN_1761946	PROM2	0.000571622	2.20719
ILMN_1756992	MUC1	0.000791287	2.19913
ILMN_1758623	HIST1H2BD	0.000570087	2.19648
ILMN_1796423	CLIC3	0.00195929	2.18585
ILMN_1699574	NRP1	0.000936978	2.18467
ILMN_1703955	FBXO32	0.00114399	2.18013
ILMN_1811921	CSRP1	0.0039065	2.17729
ILMN_1781745	C9orf152	0.000384832	2.16395
ILMN_1729453	TSPAN9	0.000952263	2.1622
ILMN_1796179	HIST1H2BK	0.00168879	2.16074
ILMN_1810978	MUCL1	0.00021444	2.15868
ILMN_1706531	ABCC5	0.00149535	2.15133
ILMN_1770505	BIK	0.000384832	2.14954
ILMN_1689004	TNFRSF12A	0.00674585	2.14627
ILMN_1681984	GALNT10	0.00179561	2.14344
ILMN_1728799	FBP1	0.000675252	2.12009
ILMN_1706687	KLHL5	0.000432215	2.11708
ILMN_1666109	MB	0.00202797	2.11624
ILMN_1664068	ERGIC1	0.000570087	2.11504
ILMN_1682929	SYTL2	0.000796632	2.10911
ILMN_1746801	CGN	0.00321299	2.10587
ILMN_1674661	CIRBP	0.00274543	2.09447
ILMN_1796461	PRSS8	0.00305229	2.0912
ILMN_1753342	SAT1	0.000770263	2.06976
ILMN_1732066	CKMT1A	0.000384832	2.06959
ILMN_1788250	LDOC1	0.00125991	2.06189
ILMN_1668743	LOC728069	0.00184462	2.06076
ILMN_1751346	ERBB3	0.00183349	2.05521
ILMN_1700967	C3orf59	0.00258119	2.05453
ILMN_1690703	C21orf34	0.00128665	2.04594
ILMN_1733248	NRBP2	0.00432419	2.03938
ILMN_1723944	TARP	0.00485879	2.03629
ILMN_1880983		0.000227605	2.03385
ILMN_1771120	TMEM45B	0.000384832	2.03131
ILMN_1702247	CCNDBP1	0.00165382	2.02754
ILMN_1809931	NDRG1	0.00288038	2.01503
ILMN_1724194	NPEPL1	0.00182211	2.00683
ILMN_1759513	RND3	0.00257474	2.00548
ILMN_1722872	MYH9	0.00705488	1.99357
ILMN_1719986	PIK3IP1	0.00170455	1.98753
ILMN_1721626	ARID5B	0.000367177	1.98661
ILMN_1770787	DDAH2	0.00219708	1.98608
ILMN_1669273	PPT1	0.0010753	1.98293
ILMN_1763638	BCAR3	0.0034778	1.97649
ILMN_1720865	OSBPL7	0.00165308	1.97511
ILMN_1771538	PSCA	0.000384832	1.96664
ILMN_1656368	ALDH4A1	0.00170455	1.96594
ILMN_1685415	HBP1	0.00219183	1.96504
ILMN_1661599	DDIT4	0.00134648	1.96435
ILMN_1697317	DYNLRB2	0.00121874	1.96339
ILMN_1724250	GRN	0.000462785	1.96065
ILMN_1776519	RAP1GAP	0.0024385	1.9598
ILMN_1720996	SLC12A2	0.0234872	1.95699
ILMN_1744635	IGDCC3	0.000444816	1.95503
ILMN_1670272	LRP10	0.00794125	1.95453
ILMN_1685122	COL9A2	0.00225533	1.95307
ILMN_1673880	EFEMP1	0.00704561	1.94974
ILMN_1703284	SPIRE2	0.00144026	1.94928
ILMN_1669281	CLN3	0.00196033	1.94309
ILMN_1763447	PLXNB2	0.00405417	1.94207
ILMN_1790797	VPS28	0.00283832	1.94024
ILMN_1700384	KIAA1522	0.000825894	1.9387
ILMN_1790689	CRISPLD2	0.000673317	1.93543
ILMN_1765459	S100A13	0.000462785	1.9302
ILMN_1713636	S100A6	0.000121737	1.92043
ILMN_1819608		0.00243657	1.91892
ILMN_1813314	HIST1H2BK	0.00392379	1.90622
ILMN_1805519	CD24	0.0286907	1.9011
ILMN_1780170	APOD	0.00103335	1.89715
ILMN_1720282	NQO1	0.00373214	1.8962
ILMN_1792689	HIST1H2AC	0.00278126	1.8953
ILMN_1673305	RHOC	0.000825476	1.89352
ILMN_1796712	S100A10	0.000211868	1.89094
ILMN_1700733	KIAA1370	0.00127199	1.89087
ILMN_1745623	EFCAB4A	0.00140422	1.89042
ILMN_1808157	RUNDC3B	0.00206282	1.88124
ILMN_1666845	KRT17	0.00532509	1.88016
ILMN_1679133	SERPINB1	0.0018337	1.87984
ILMN_1814726	SCARB2	0.000407871	1.87899
ILMN_1749118	CALML5	0.00286705	1.8717
ILMN_1779448	EFHD1	0.00103812	1.87167
ILMN_1743241	ARL4A	0.0018337	1.86501
ILMN_1730084	COMT	0.00176982	1.86149
ILMN_1668134	GSTM1	0.000267057	1.86066
ILMN_1671777	FGF13	0.0195857	1.85889
ILMN_1802257	PCTP	0.00109333	1.85401
ILMN_1790317	RAB26	0.0019692	1.85213
ILMN_1694325	NFIX	0.00378444	1.85204
ILMN_1772686	FGD3	0.00213726	1.85051
ILMN_1726108	LASS2	0.00147879	1.84912
ILMN_1802615	CDK6	0.000357983	1.84672
ILMN_1811272	GPR81	0.000188927	1.84189
ILMN_1683277	KIAA0319L	0.00165322	1.84181
ILMN_1703123	AXUD1	0.000626439	1.83861
ILMN_1780825	RRAS	0.000470779	1.83538
ILMN_1760174	MCCC1	0.00154752	1.83365
ILMN_1658706	ST6GALNAC2	0.000188927	1.83328
ILMN_1758941	REEP5	0.0019692	1.83305
ILMN_1665994	SILV	0.00373214	1.83166
ILMN_1730229	CGNL1	0.00158501	1.82695
ILMN_1757639	C3orf57	0.00286788	1.82531
ILMN_1761058	ACAD11	0.0273758	1.82414
ILMN_1653708	CORO1B	0.00149535	1.82116
ILMN_1692962	CTDSP2	0.00397771	1.81876
ILMN_1807206	DHRS1	0.00121037	1.81787
ILMN_1747577	ALAD	0.0015233	1.8174
ILMN_1784985	PRRT3	0.00104147	1.8168
ILMN_1687247	SPATA20	0.00242067	1.81664
ILMN_1814790	SHANK2	0.00125391	1.81644
ILMN_1715476	LOC649970	0.000394987	1.81561
ILMN_1666924	PINK1	0.000492195	1.81497
ILMN_1770290	CNN2	0.000766187	1.8115
ILMN_1736184	GSTM3	0.000357983	1.80774
ILMN_1776788	C5orf41	0.0044491	1.80209
ILMN_1708041	PLEKHF1	0.00144026	1.80046
ILMN_1659936	PPP1R15A	0.000546723	1.79993
ILMN_1757837	C6orf165	0.00170455	1.79925
ILMN_1676358	RALB	0.00458904	1.7947
ILMN_1784602	CDKN1A	0.00256619	1.79397
ILMN_1775405	ARL4A	0.0164269	1.79324
ILMN_1690170	CRABP2	0.00144026	1.7902
ILMN_1711171	CREB3L4	0.00140422	1.78939
ILMN_1804629	TPK1	0.000577823	1.78857
ILMN_1778668	TAGLN	0.00829142	1.78857
ILMN_1685714	INHBB	0.00106434	1.78586
ILMN_1679194	UGT2B7	0.00396435	1.78034
ILMN_1752582	RAB5B	0.00106583	1.77882
ILMN_1756999	RBL2	0.00522837	1.77684
ILMN_1688565	ZNF580	0.000188927	1.77574
ILMN_1790014	METRNL	0.0142357	1.7749
ILMN_1672605	C7orf41	0.000233014	1.77397
ILMN_1753101	VTCN1	0.0011427	1.77052
ILMN_1712985	C17orf58	0.00422885	1.76639
ILMN_1746664	WSB2	0.00325639	1.76594
ILMN_1663092	CITED2	0.00212773	1.76486
ILMN_1770245	EPB41L5	0.000956489	1.76129
ILMN_1658709	LAMB1	0.00195929	1.76105
ILMN_1715013	ERMAP	0.00195929	1.76092
ILMN_1662587	PNPLA7	0.00857207	1.76051
ILMN_1811702	GRN	8.88979e-05	1.75814
ILMN_1683044	PPP1R2	0.000300402	1.7581
ILMN_1796490	GRINA	0.000492195	1.75664
ILMN_1733811	JUP	0.00339347	1.75432
ILMN_1653415	SPANXA2	0.00602708	1.74998
ILMN_1690304	MGC26718	0.00630115	1.74891
ILMN_1730568	ZDHHC7	0.0113184	1.74678
ILMN_1712684	FAM20C	0.0045901	1.74432
ILMN_1764609	PWWP2B	0.00134648	1.74006
ILMN_1711888	COBL	0.00125991	1.7388
ILMN_1726245	TGFBR2	0.000570087	1.73292
ILMN_1777644	PIB5PA	7.69968e-05	1.73288
ILMN_1749838	MZF1	0.00304546	1.73277
ILMN_1801610	METRNL	0.000620522	1.73188
ILMN_1757406	HIST1H1C	0.000902259	1.73087
ILMN_1701875	ZYX	0.00811722	1.72813
ILMN_1691860	SPRY1	0.00104147	1.72583
ILMN_1750785	SYTL1	0.000835901	1.72528
ILMN_1733841	TCF7L1	0.00200952	1.72506
ILMN_1693630	C16orf7	0.00257289	1.72489
ILMN_1712419	DCDC2	0.000632066	1.72086
ILMN_1779171	SGSM2	0.000571622	1.71955
ILMN_1709451	TFPT	0.00285203	1.71932
ILMN_1782743	LETMD1	0.00260768	1.71814
ILMN_1803423	ARHGEF6	0.00140099	1.71715
ILMN_1702835	SH3BGRL	0.0240317	1.71337
ILMN_1725079	TSPAN31	0.00159649	1.71331
ILMN_1758250	TRAFD1	0.0276021	1.7118
ILMN_1705116	C6orf85	0.00256584	1.71171
ILMN_1708375	IRF1	0.00615824	1.71167
ILMN_1690921	STAT2	0.00118721	1.71154
ILMN_1771987	SLC44A2	0.00316922	1.71069
ILMN_1713744	C14orf132	0.00532509	1.70968
ILMN_1670870	ALCAM	0.00149535	1.70731
ILMN_1685397	ITGA3	0.00144026	1.70665
ILMN_1671583	MKRN1	0.00195929	1.70455
ILMN_1783287	S100A14	0.0207468	1.70447
ILMN_1669376	DRAM1	0.00179796	1.70357
ILMN_1697420	TINF2	0.0097027	1.70108
ILMN_1669390	PPP1R13L	0.00761851	1.70049
ILMN_1671478	CKB	0.00391252	1.69815
ILMN_1713892	C4orf34	0.0073776	1.69617
ILMN_1756937	ST8SIA4	0.00368628	1.69368
ILMN_1656111	MYLIP	0.000368844	1.69068
ILMN_1742450	TAPBP	0.00274543	1.68966
ILMN_1703301	LOC653479	0.00294108	1.68926
ILMN_1760335	ADPRHL1	0.00159649	1.68908
ILMN_1746917	LOC729843	0.00272551	1.689
ILMN_1809467	VAMP5	0.0018363	1.68791
ILMN_1850238		0.00109333	1.68715
ILMN_1737308	GLRX	0.0021718	1.68647
ILMN_1797522	DUSP3	0.00171852	1.68567
ILMN_1671568	ECHDC2	0.00011631	1.68566
ILMN_1658071	ATP1B1	0.000643469	1.68533
ILMN_1716875	CTNND2	0.000322396	1.68452
ILMN_1657996	LOC642035	0.000546723	1.67646
ILMN_1745116	ABHD12	0.00108752	1.6756
ILMN_1654392	KHNYN	0.00621807	1.67503
ILMN_1652128	LMBRD1	0.00327004	1.67404
ILMN_1796349	SMPDL3A	0.0094923	1.67346
ILMN_1728163	CTDSP1	0.00154658	1.6729
ILMN_1713934	LITAF	0.000432215	1.67221
ILMN_1767848	PCMTD2	0.00915895	1.67154
ILMN_1651610	LOC730525	0.00274543	1.67042
ILMN_1747244	CCNG2	0.00753744	1.67024
ILMN_1653115	ECH1	0.00426033	1.66796
ILMN_1732296	ID3	0.00504762	1.66733
ILMN_1763491	CKMT1B	0.00630115	1.66702
ILMN_1797557	PLEKHA6	0.00206282	1.66508
ILMN_1718924	ETFA	0.00829142	1.66404
ILMN_1652797	FAM174B	0.00268354	1.66135
ILMN_1795937	VIL2	0.00886299	1.66034
ILMN_1660199	ACAA2	0.00522837	1.65721
ILMN_1735930	KLF2	0.00123479	1.65437
ILMN_1778377	ERGIC1	0.00451182	1.65271
ILMN_1734276	PMEPA1	0.000322396	1.65237
ILMN_1790533	PHACTR2	0.0263955	1.65237
ILMN_1879480		0.00596898	1.65214
ILMN_1655429	TNFAIP1	0.00090237	1.65212
ILMN_1723198	CDKN2B	0.0343571	1.65151
ILMN_1741200	RFX5	0.00705367	1.65147
ILMN_1719170	WBSCR27	0.00251426	1.65113
ILMN_1700202	TMEM135	0.00689513	1.64937
ILMN_1763228	MEF2D	0.00223881	1.64868
ILMN_1675117	HSD17B11	0.0018337	1.64814
ILMN_1698766	PYCARD	0.00166934	1.64809
ILMN_1722156	RWDD2A	0.00311677	1.64803
ILMN_1730054	GSTT1	0.0019011	1.64582
ILMN_1662846	GPR160	0.00203443	1.64427
ILMN_1683328	IP6K2	0.00416011	1.64412
ILMN_1731073	CAPN9	0.00184139	1.64224
ILMN_1801216	S100P	0.00370453	1.64082
ILMN_1785330	SH3BP4	0.0015233	1.63918
ILMN_1712112	RCAN1	0.00233642	1.63746
ILMN_1803564	YIPF1	0.000516584	1.63725
ILMN_1780898	PRKCH	0.00269522	1.63626
ILMN_1765258	HLA-E	0.00166796	1.63561
ILMN_1759676	HOXC13	0.00664171	1.63514
ILMN_1812995	CTSL1	0.00339347	1.63513
ILMN_1749115	RTN2	0.00708558	1.63487
ILMN_1669433	KIAA0913	0.00109333	1.63483
ILMN_1690963	ASAP1	0.00212063	1.63479
ILMN_1651438	ZFPM1	0.00106434	1.63359
ILMN_1793832	GRB14	0.017258	1.63115
ILMN_1856480		0.00202008	1.63025
ILMN_1791306	C9orf103	0.00598177	1.63016
ILMN_1725338	CLDN23	0.00145933	1.62963
ILMN_1696254	CYB5D2	0.000635344	1.6294
ILMN_1678998	LRRC14	0.00229343	1.62933
ILMN_1723978	LGALS1	0.00585127	1.62933
ILMN_1667711	HRASLS3	0.00202797	1.62898
ILMN_1739605	LYPD3	0.00098156	1.62536
ILMN_1679093	ZNF581	0.00221015	1.62479
ILMN_1714197	ACSS2	0.00501163	1.62422
ILMN_1677843	RAB24	0.00589756	1.62282
ILMN_1729237	CYB5R1	0.00824454	1.61949
ILMN_1726981	VEGFB	0.00268317	1.61513
ILMN_1708143	FAM127A	0.0130891	1.61325
ILMN_1671703	ACTA2	0.00158029	1.6115
ILMN_1669033	NCOA1	0.006009	1.61059
ILMN_1712095	FOXO4	0.000825894	1.61025
ILMN_1769201	ELF3	0.00140099	1.60904
ILMN_1746403	GTF2IRD2P	0.00661746	1.60894
ILMN_1670807	FAM84B	0.00365543	1.60831
ILMN_1678546	PEX11B	0.000188927	1.60812
ILMN_1752968	LAMB2	0.00475306	1.60747
ILMN_1771746	C6orf165	0.0140096	1.60736
ILMN_1748827	LOC388564	0.00388322	1.60618
ILMN_1812526	TGFB2	0.0185977	1.60299
ILMN_1765990	KCNK2	0.0260276	1.60135
ILMN_1698100	ANXA2P1	0.000741293	1.59912
ILMN_1768505	IL13RA1	0.0053024	1.59877
ILMN_1779015	ZNF467	0.0113049	1.59789
ILMN_1741954	SMYD3	0.00287135	1.59649
ILMN_1804663	THBS3	0.00912363	1.59441
ILMN_1700515	C17orf58	0.00776358	1.59426
ILMN_1780773	LOC400027	0.0197049	1.59096
ILMN_1807894	SLC7A8	0.00697385	1.59
ILMN_1766657	STOM	0.0100453	1.58688
ILMN_1814856	C9orf7	0.00165308	1.58645
ILMN_1778523	KLF9	0.00295646	1.58517
ILMN_1764619	FLJ45244	0.00109333	1.58442
ILMN_1800425	SLC9A1	0.0180637	1.58407
ILMN_1797342	FNBP1	0.00481976	1.58296
ILMN_1808508	KITLG	0.0106297	1.58249
ILMN_1687315	RXRA	0.00106434	1.58109
ILMN_1755234	SSH3	0.0139108	1.57947
ILMN_1718303	PVRL2	0.00366085	1.57918
ILMN_1751034	ITPRIPL2	0.00652995	1.57854
ILMN_1680453	ITM2C	0.00199097	1.57838
ILMN_1656940	ABLIM3	0.000764697	1.57804
ILMN_1778347	NUDT2	0.00305085	1.57774
ILMN_1810147	ZNF524	0.00724415	1.57751
ILMN_1803745	SUOX	0.000865985	1.57698
ILMN_1803219	TMC4	0.00210401	1.57685
ILMN_1906187		0.00344718	1.57486
ILMN_1802888	ZNF185	0.00276477	1.57452
ILMN_1683470	TMEM139	0.00323637	1.57349
ILMN_1660186	SYF2	0.00225533	1.57346
ILMN_1774427	CALCOCO1	0.0019011	1.5728
ILMN_1784410	UBP1	0.0342544	1.5722
ILMN_1789095	BMPR2	0.00957773	1.57121
ILMN_1661755	FAM129B	0.00199097	1.57117
ILMN_1681628	ZNF277	0.00905418	1.57104
ILMN_1795325	ACTG2	0.0129749	1.57003
ILMN_1802096	ABTB1	0.0142446	1.56932
ILMN_1791912	SIDT2	0.0127845	1.56824
ILMN_1798308	AHSA2	0.0325339	1.56811
ILMN_1750409	RAB9A	0.00201242	1.56693
ILMN_1808824	NEBL	0.000981997	1.56663
ILMN_1751425	ERMP1	0.00602861	1.56654
ILMN_1679797	ADARB1	0.00727233	1.56529
ILMN_1673363	CD97	0.00556384	1.56493
ILMN_1653466	HES4	0.00195929	1.56456
ILMN_1711030	OPLAH	0.00695303	1.56353
ILMN_1795300	FLJ41603	0.00179561	1.56296
ILMN_1867188		0.0210395	1.56266
ILMN_1806603	MESP1	0.00182211	1.56183
ILMN_1756146	WDR45	0.00179561	1.55986
ILMN_1682738	SMAD3	0.00483854	1.55971
ILMN_1660749	ASPSCR1	0.00417674	1.55962
ILMN_1694840	MATN2	0.00694119	1.55877
ILMN_1735052	ULK1	0.0240312	1.55758
ILMN_1689059	ZNF329	0.00278744	1.55612
ILMN_1699631	GATS	0.00797924	1.55272
ILMN_1697597	KIAA0494	0.00195929	1.55141
ILMN_1805512	WDR13	0.0101379	1.55055
ILMN_1750101	S100A11	0.00278126	1.55042
ILMN_1744517	GNS	0.000367177	1.55019
ILMN_1689908	ANKRD13A	0.00492213	1.55001
ILMN_1803772	POLD4	0.0153944	1.54893
ILMN_1735014	KLF6	0.00151633	1.54872
ILMN_1814151	AGR2	0.0084452	1.5487
ILMN_1811574	MAPK8IP3	0.00182211	1.5485
ILMN_1764871	PIGP	0.00652995	1.5471
ILMN_1715555	DBP	0.0013533	1.54658
ILMN_1717706	PLK2	0.014086	1.54656
ILMN_1791423	LOC401052	0.00180321	1.54577
ILMN_1738707	S100A13	0.00269522	1.54466
ILMN_1790807	XPC	0.00558492	1.54458
ILMN_1740319	IFI27L2	0.00169769	1.54349
ILMN_1755727	KDM5B	0.00140099	1.54176
ILMN_1801845	DNAL4	0.00202797	1.54162
ILMN_1718950	ZNF433	0.00242067	1.54157
ILMN_1689318	NUAK1	0.00512135	1.54049
ILMN_1682864	SPSB3	0.0410412	1.53951
ILMN_1788416	FAM108C1	0.0219432	1.53886
ILMN_1787567	TSC22D1	0.019104	1.53854
ILMN_1695706	H3F3B	0.0481713	1.53759
ILMN_1710644	MARVELD3	0.00284906	1.53735
ILMN_1803850	TSPAN15	0.00170455	1.53689
ILMN_1812926	ANTXR2	0.000367177	1.53534
ILMN_1658469	TP53AP1	0.00291601	1.53525
ILMN_1752793	SAP18	0.000661208	1.53496
ILMN_1667418	LOC283953	0.0352513	1.53487
ILMN_1849186		0.0124793	1.53455
ILMN_1672295	ZC3H12A	0.00915895	1.53421
ILMN_1814106	C9orf169	0.000674928	1.53111
ILMN_1805636	PGAP3	0.00471384	1.53031
ILMN_1792409	AMOT	0.00331522	1.52999
ILMN_1761996	SFRS5	0.00604983	1.52998
ILMN_1664861	ID1	0.018137	1.52791
ILMN_1741970	JUP	0.0097195	1.52599
ILMN_1751689	CHRM1	0.00202745	1.52561
ILMN_1795836	C21orf57	0.00628224	1.52528
ILMN_1743373	DLL1	0.00313365	1.52355
ILMN_1730223	RNF39	0.0224896	1.52352
ILMN_1771057	XAB2	0.00398722	1.52324
ILMN_1757388	OCEL1	0.0115046	1.52238
ILMN_1782751	GLI4	0.00206355	1.52148
ILMN_1763144	NEU1	0.000432215	1.52104
ILMN_1661439	FLOT1	0.0158903	1.52073
ILMN_1812262	DDR1	0.0187943	1.5186
ILMN_1743078	LOC643031	0.00724077	1.51841
ILMN_1752728	FUCA1	0.0018337	1.51725
ILMN_1711828	ANKRD10	0.0197049	1.51711
ILMN_1749478	TCEAL3	0.0123303	1.51686
ILMN_1693311	TMBIM6	0.00288038	1.51583
ILMN_1746408	MIDN	0.00278126	1.51542
ILMN_1709237	EPHX2	0.00554058	1.51503
ILMN_1739586	FEZ2	0.00333758	1.51476
ILMN_1811624	THADA	0.0066339	1.51439
ILMN_1793543	C1orf51	0.00195929	1.51332
ILMN_1804988	MOAP1	0.00437194	1.51332
ILMN_1785266	OFD1	0.00674607	1.51226
ILMN_1687275	JUB	0.0207341	1.50952
ILMN_1792508	TMEM59	0.00561925	1.50834
ILMN_1752249	FAM38A	0.0200949	1.50797
ILMN_1806030	PPL	0.0131988	1.50777
ILMN_1758895	CTSK	0.0068677	1.50739
ILMN_1661537	LEPROT	0.0024385	1.50697
ILMN_1668822	BATF	0.0116181	1.50583
ILMN_1770085	BTG2	0.0148357	1.50572
ILMN_1720430	PPDPF	0.00497244	1.50553
ILMN_1769547	DIO1	0.00269191	1.50483
ILMN_1752269	ACSS1	0.00283832	1.50464
ILMN_1690682	B3GALT4	0.0117183	1.50422
ILMN_1803211	FBXO2	0.00108056	1.50416
ILMN_1665066	C4orf14	0.00217581	1.50384
ILMN_1797005	PGLS	0.00157217	1.50345
ILMN_1713756	GLUD1	0.0311289	1.50302
ILMN_1663351	SLC2A10	0.0237748	1.50169
ILMN_1815012	EXOC7	0.0146689	1.5013
ILMN_1723042	CLDN3	0.0111221	1.50102
ILMN_1751572	TLE1	0.00291601	1.50094
ILMN_1710170	PPAP2C	0.0039065	1.50077
ILMN_1756877	C14orf179	0.00186127	1.50045
ILMN_1707727	ANGPTL4	0.00657708	1.49935
ILMN_1734483	BSDC1	0.00613449	1.49918
ILMN_1723020	MAP3K1	0.00502884	1.4991
ILMN_1686082	C14orf79	0.0162393	1.49652
ILMN_1695354	BMF	0.0010207	1.49557
ILMN_1698243	C1orf85	0.00858904	1.49536
ILMN_1857335		0.00837505	1.4948
ILMN_1804117	FAM89B	0.0082946	1.49364
ILMN_1689868	TMEM80	0.000835901	1.49341
ILMN_1764166	BCKDHB	0.00330305	1.49333
ILMN_1732127	RBKS	0.0198848	1.49274
ILMN_1729294	RNF130	0.0141719	1.49271
ILMN_1682775	EDN1	0.0013533	1.49135
ILMN_1863185		0.0212708	1.49041
ILMN_1667626	EGLN3	0.00177498	1.48936
ILMN_1723843	CSNK2A2	0.000432215	1.48863
ILMN_1691143	RAB18	0.00886299	1.48689
ILMN_1704500	STAP2	0.00205813	1.48602
ILMN_1731374	CPE	0.0144616	1.48595
ILMN_1758731	CYP2J2	0.00266973	1.48476
ILMN_1723678	PRPH	0.0127324	1.48462
ILMN_1800354	CST3	0.0100814	1.48381
ILMN_1728660	PMPCB	0.0104838	1.4821
ILMN_1770454	AGRN	0.0153944	1.48097
ILMN_1692865	VPS37D	0.00110171	1.47984
ILMN_1670926	CHST15	0.00125838	1.4796
ILMN_1791826	RAB25	0.0139023	1.47948
ILMN_1688848	TMEM44	0.00602782	1.47944
ILMN_1743767	ZNF446	0.00727233	1.47859
ILMN_1793950	P704P	0.0452057	1.47841
ILMN_1682930	SIPA1	0.000470779	1.47823
ILMN_1688479	LRRC42	0.000766187	1.47779
ILMN_1680223	PNPLA8	0.0270824	1.47747
ILMN_1688721	FLJ44048	0.000188899	1.47689
ILMN_1704294	CDH3	0.0117241	1.47613
ILMN_1678143	ARHGDIB	0.00811722	1.47597
ILMN_1752932	MPZL2	0.0136734	1.47513
ILMN_1769876	TBC1D2	0.00601121	1.47502
ILMN_1703852	EFNB2	0.0342544	1.47409
ILMN_1697448	TXNIP	0.00109333	1.47362
ILMN_1761260	COBLL1	0.0133478	1.47314
ILMN_1714710	CCDC120	0.00198931	1.47305
ILMN_1686750	MGEA5	0.000546723	1.473
ILMN_1679188	ATP5S	0.0201254	1.47271
ILMN_1753468	CD63	0.0153944	1.47244
ILMN_1915188		0.00908459	1.47234
ILMN_1765076	APPL2	0.00449948	1.47136
ILMN_1755897	UGT2B7	0.00251464	1.47104
ILMN_1795298	GPER	0.0417331	1.4709
ILMN_1705144	ULK1	0.0042625	1.46952
ILMN_1740685	LOC652541	0.00574151	1.46934
ILMN_1703041	IDUA	0.00485959	1.46932
ILMN_1746012	MBD6	0.0425542	1.46746
ILMN_1673604	YIPF3	0.00871016	1.4671
ILMN_1659106	PHLDA3	0.00659742	1.46696
ILMN_1665526	TCEA2	0.0108756	1.46684
ILMN_1686370	AGXT2L2	0.000432215	1.46611
ILMN_1659029	FAM116B	0.00695626	1.46609
ILMN_1787691	CITED4	0.017778	1.46604
ILMN_1808587	ZFHX3	0.00522837	1.46549
ILMN_1704369	LIMA1	0.0182895	1.46476
ILMN_1791580	FXYD3	0.0100449	1.4646
ILMN_1802603	RFNG	0.0121378	1.4641
ILMN_1785284	ALDH6A1	0.00727233	1.46377
ILMN_1761566	C5orf32	0.00586302	1.46362
ILMN_1752333	SLC35E1	0.0205661	1.46337
ILMN_1769520	UBE2L6	0.00286705	1.46319
ILMN_1755383	LRRC1	0.00236749	1.46251
ILMN_1662932	LCP1	0.0021718	1.46206
ILMN_1665781	LOC390466	0.0465943	1.46188
ILMN_1799589	NOXA1	0.013201	1.46167
ILMN_1774949	PIGP	0.00659742	1.46097
ILMN_1793990	ID2	0.0073776	1.45966
ILMN_1662340	ZNF358	0.00153922	1.45856
ILMN_1778360	PYGB	0.00285939	1.45842
ILMN_1771482	KIAA1324	0.0140379	1.45828
ILMN_1763640	KIAA1602	0.0416978	1.45822
ILMN_1721046	PTMS	0.00204799	1.45747
ILMN_1809173	LOC729021	0.00908715	1.45733
ILMN_1779071	FEZ1	0.00212773	1.45689
ILMN_1813270	ELF5	0.020298	1.45577
ILMN_1813295	LMO3	0.00753354	1.45487
ILMN_1738849	SLC9A2	0.00295646	1.45466
ILMN_1802706	IDH3G	0.0291092	1.45403
ILMN_1701918	KLHDC9	0.000692684	1.45338
ILMN_1810953	LOC653496	0.00821903	1.45218
ILMN_1683755	SOX13	0.003509	1.45179
ILMN_1667034	PDPR	0.0219195	1.45124
ILMN_1683146	FTH1	0.00257289	1.4507
ILMN_1654016	MRLC2	0.00909281	1.45033
ILMN_1674633	UBE2H	0.0131773	1.4491
ILMN_1752451	CTSH	0.0129749	1.44872
ILMN_1733799	FAM195B	0.00283832	1.44806
ILMN_1805842	FHL1	0.0119276	1.44713
ILMN_1681081	AGPAT2	0.0148502	1.44701
ILMN_1730539	NPHP3	0.00337314	1.44679
ILMN_1725241	GSTK1	0.0139466	1.44504
ILMN_1802380	RERE	0.00396435	1.44488
ILMN_1667966	C1orf24	0.00122853	1.44483
ILMN_1744268	PLEC1	0.0413043	1.44422
ILMN_1739558	CRELD1	0.00278126	1.44379
ILMN_1796458	GABARAPL2	0.00823958	1.44374
ILMN_1794190	CCPG1	0.0135511	1.44362
ILMN_1687440	HIPK2	0.0334657	1.44328
ILMN_1685709	TMEM125	0.00500904	1.44301
ILMN_1757099	C10orf81	0.000960841	1.4428
ILMN_1783798	GAS8	0.0131344	1.43988
ILMN_1742410	BCL2L1	0.0117241	1.43971
ILMN_1737089	CAPN5	0.00766763	1.43957
ILMN_1681703	FOXO3	0.00417674	1.43912
ILMN_1717165	IGBP1	0.00430193	1.4391
ILMN_1714397	CRYL1	0.0053024	1.43859
ILMN_1810127	ZNF789	0.00324997	1.43807
ILMN_1787673	PLLP	0.0132501	1.43584
ILMN_1684440	PXN	0.0101379	1.43489
ILMN_1800590	BBS1	0.000432215	1.43436
ILMN_1660021	M6PRBP1	0.00170765	1.43389
ILMN_1698732	PALLD	0.000501718	1.43338
ILMN_1886487		0.00325628	1.43319
ILMN_1665909	LASP1	0.0278215	1.43315
ILMN_1726565	PIK3R2	0.0121736	1.43266
ILMN_1768480	VGLL4	0.00724415	1.43223
ILMN_1656621	CHMP2A	0.00256317	1.43219
ILMN_1787509	PRIC285	0.0393488	1.43196
ILMN_1757644	UBE2H	0.0157454	1.43194
ILMN_1749962	NCAM2	0.00526696	1.43126
ILMN_1747281	EVI5L	0.00531645	1.43062
ILMN_1674866	TADA3	0.0125984	1.43039
ILMN_1697544	SLC25A29	0.00256584	1.42972
ILMN_1762990	KIAA0141	0.00741707	1.42927
ILMN_1683932	ZNF425	0.00381265	1.42902
ILMN_1659845	KIAA0355	0.00194169	1.4282
ILMN_1672504	PDXK	0.0229392	1.42809
ILMN_1669633	ACP1	0.00142589	1.42787
ILMN_1714527	VAMP3	0.00710518	1.42745
ILMN_1788783	TRAM2	0.00636726	1.4271
ILMN_1793572	C21orf81	0.0168573	1.42696
ILMN_1703244	MAP1LC3B	0.00705945	1.42611
ILMN_1741613	SERINC1	0.0447858	1.42541
ILMN_1808326	NPAS3	0.00857471	1.42488
ILMN_1741440	SLC35A1	0.0224482	1.42427
ILMN_1756152	MFSD11	0.00179561	1.42346
ILMN_1760180	MID2	0.0173184	1.42199
ILMN_1659215	CYP4B1	0.0226671	1.42159
ILMN_1699610	CCT6B	0.0241097	1.4209
ILMN_1688071	NAT1	0.0343874	1.42065
ILMN_1706511	TEF	0.0125807	1.42042
ILMN_1659365	LOC653071	0.00182187	1.41931
ILMN_1652409	SPATA7	0.0121825	1.41849
ILMN_1742382	RIMS3	0.00979057	1.41723
ILMN_1746241	SDHC	0.0117438	1.41709
ILMN_1712231	SH3YL1	0.0146854	1.41659
ILMN_1663407	SURF1	0.00662402	1.41516
ILMN_1696911	FTHL8	0.0420338	1.41477
ILMN_1799744	GALC	0.0189145	1.41423
ILMN_1657864	TMUB2	0.00602782	1.41412
ILMN_1659766	BAG3	0.00283832	1.41363
ILMN_1693119	LYPD6B	0.00857471	1.41275
ILMN_1699829	CTGF	0.00449304	1.41269
ILMN_1680840	LOC641941	0.0117183	1.41209
ILMN_1758806	C21orf2	0.00886299	1.41168
ILMN_1699989	BNIPL	0.0141719	1.41153
ILMN_1775823	POFUT2	0.0239947	1.41133
ILMN_1724718	NCK2	0.000884108	1.41095
ILMN_1693233	KIAA0513	0.00243657	1.41075
ILMN_1768575	SFTPD	0.00282149	1.41033
ILMN_1801584	CXCR4	0.0387221	1.40989
ILMN_1706571	SLC35D2	0.00929384	1.40934
ILMN_1803277	MVP	0.00378444	1.40899
ILMN_1760049	SERGEF	0.00361915	1.40829
ILMN_1762764	SH3BGRL2	0.00269732	1.40826
ILMN_1700257	C4orf32	0.0231112	1.40807
ILMN_1788223	RSPH3	0.00160844	1.40784
ILMN_1790249	F8A1	0.0400803	1.40691
ILMN_1727080	MYO6	0.0011427	1.40689
ILMN_1743340	CHST14	0.0198848	1.40643
ILMN_1745904	CCDC6	0.0193447	1.40608
ILMN_1694980	NAGLU	0.00278126	1.40524
ILMN_1805345	MOSPD3	0.00350825	1.40434
ILMN_1674874	MFSD10	0.00267183	1.40409
ILMN_1667715	LOC645176	0.00170455	1.40363
ILMN_1773073	PHYH	0.0018998	1.40349
ILMN_1809437	RHBDD2	0.0396489	1.40331
ILMN_1757877	HCFC1R1	0.0133845	1.40315
ILMN_1747857	SMARCE1	0.00274543	1.40245
ILMN_1711368	TRAPPC9	0.0177297	1.40224
ILMN_1726666	GPX3	0.0347774	1.40139
ILMN_1737514	KYNU	0.00674585	1.40123
ILMN_1753890	TMEM97	0.00895605	1.40119
ILMN_1694432	CRIP2	0.0138828	1.39976
ILMN_1769092	FAM176B	0.0253305	1.39964
ILMN_1718766	MT1F	0.00837807	1.39962
ILMN_1776723	PHF11	9.76771e-05	1.39948
ILMN_1696375	TTC31	0.0062592	1.39948
ILMN_1787127	SLC43A2	0.0205422	1.39857
ILMN_1747935	GOLGB1	0.00501697	1.39816
ILMN_1695962	SLC12A9	0.0210143	1.39808
ILMN_1663640	MAOA	0.0070853	1.39794
ILMN_1802628	PPAPDC2	0.00724415	1.39755
ILMN_1788180	RAB13	0.0256834	1.39748
ILMN_1711566	TIMP1	0.0192837	1.39722
ILMN_1704014	LOC730256	0.00829142	1.39656
ILMN_1675038	PRMT2	0.0241624	1.39579
ILMN_1760027	WAS	0.00138806	1.39573
ILMN_1692707	C2orf79	0.0206952	1.39566
ILMN_1664750	TMBIM4	0.0286456	1.39483
ILMN_1712678	RPS27L	0.0357215	1.3947
ILMN_1728224	OGFR	0.0200459	1.39411
ILMN_1772706	C10orf32	0.0430786	1.39386
ILMN_1734366	RORC	0.0132608	1.39339
ILMN_1795826	ATP6V0D1	0.0416978	1.39316
ILMN_1763091	C14orf43	0.0129465	1.39308
ILMN_1677607	SC5DL	0.00125391	1.393
ILMN_1757702	LOC647673	0.00971259	1.39262
ILMN_1788213	FRAT2	0.00295956	1.39254
ILMN_1758398	GUK1	0.0126368	1.39248
ILMN_1746517	KYNU	0.0351867	1.39246
ILMN_1652754	ZNF428	0.0434725	1.39242
ILMN_1779751	C7orf55	0.00118721	1.39231
ILMN_1659782	STK19	0.0360812	1.3907
ILMN_1767068	SMAD6	0.0130689	1.39052
ILMN_1716547	NAGK	0.00689513	1.39046
ILMN_1739641	MTMR3	0.0315859	1.39018
ILMN_1758633	CCDC130	0.0119864	1.38986
ILMN_1724700	RIOK3	0.0365278	1.38919
ILMN_1700625	ATP5S	0.0127563	1.3891
ILMN_1658624	UBXN6	0.0150441	1.38871
ILMN_1669592	2002-03-01	0.0123398	1.38656
ILMN_1764082	MBOAT1	0.0153919	1.38619
ILMN_1812666	DNAJC15	0.0109673	1.3858
ILMN_1737426	PCMTD1	0.0139173	1.38547
ILMN_1810962	PTPRK	0.00502152	1.38539
ILMN_1676449	SLIT2	0.0154319	1.38526
ILMN_1781285	DUSP1	0.0175337	1.38473
ILMN_1655433	BCKDHB	0.000627698	1.38391
ILMN_1664025	PXMP4	0.0245235	1.38338
ILMN_1805104	ABAT	0.00179561	1.38327
ILMN_1711361	ZNF319	0.00579025	1.38304
ILMN_1732176	AGPAT2	0.00839362	1.38271
ILMN_1813893	DDX43	0.0248044	1.38239
ILMN_1657475	GALT	0.0258449	1.3819
ILMN_1655952	FAM39E	0.00760209	1.38172
ILMN_1654629	TMEM175	0.0187655	1.38168
ILMN_1694398	EIF3F	0.00824556	1.38152
ILMN_1696675	CES2	0.00195929	1.38151
ILMN_1712431	FAM113B	0.00695626	1.38046
ILMN_1771627	ZMIZ1	0.0169209	1.38005
ILMN_1677385	C8orf40	0.0393599	1.37939
ILMN_1756542	TBC1D17	0.0261726	1.37906
ILMN_1781386	WIPI1	0.0363751	1.37892
ILMN_1671839	TAF1C	0.00179561	1.37794
ILMN_1697267	PRKCZ	0.0393438	1.37783
ILMN_1794677	TMC6	0.0328247	1.37781
ILMN_1810584	IL1R1	0.00406982	1.37752
ILMN_1805645	TMTC2	0.000560049	1.3761
ILMN_1760303	PIK3R1	0.0112615	1.37603
ILMN_1724040	ANKRD57	0.00719735	1.37585
ILMN_1768282	SNX21	0.000756017	1.37574
ILMN_1760574	RAI2	0.0154208	1.37557
ILMN_1735788	TRIOBP	0.00201242	1.37544
ILMN_1687978	PHLDA1	0.00159173	1.37543
ILMN_1679771	LOC388969	0.0136825	1.37523
ILMN_1694106	GPD1L	0.00639531	1.3747
ILMN_1741054	SLC5A6	0.0328247	1.37406
ILMN_1773380	UNC13D	0.0280028	1.37405
ILMN_1689831	FLJ11235	0.00596055	1.37403
ILMN_1798288	MOBKL2C	0.0311279	1.37344
ILMN_1722809	NRCAM	0.00416011	1.37291
ILMN_1741131	CHRNB1	0.0179634	1.37267
ILMN_1752294	PCDH9	0.0142239	1.37238
ILMN_1805992	KIAA1598	0.0168573	1.37224
ILMN_1708482	TMEM80	0.00592373	1.37203
ILMN_1749834	LOC388588	0.0231929	1.37158
ILMN_1803673	LOC113230	0.00705945	1.37156
ILMN_1763265	CHMP1B	0.0120745	1.37138
ILMN_1771333	CD47	0.0187943	1.37138
ILMN_1673509	RPL28	0.0226155	1.371
ILMN_1757736	IRX5	0.012571	1.37089
ILMN_1701247	LOC132241	0.00979057	1.37087
ILMN_1684352	TRIM45	0.0154208	1.37085
ILMN_1654609	TIGA1	0.0109539	1.37065
ILMN_1808731	LBX2	0.0376958	1.37057
ILMN_1800733	MANBA	0.00125391	1.36994
ILMN_1695435	LOC653610	0.0390807	1.36991
ILMN_1765858	CAB39	0.0208093	1.36977
ILMN_1715569	CCDC53	0.00191034	1.36952
ILMN_1703891	TBC1D9	0.0045289	1.36945
ILMN_1756657	TRIM7	0.0463586	1.36879
ILMN_1754130	TRIM52	0.00780425	1.36825
ILMN_1672878	ABR	0.031893	1.36783
ILMN_1748488	TXNL4B	0.0479594	1.36743
ILMN_1885728	KIAA1147	0.0357668	1.36679
ILMN_1749368	HIST1H3H	0.00256584	1.36666
ILMN_1654542	C5orf21	0.0111834	1.36655
ILMN_1737343	FNIP1	0.0134097	1.36629
ILMN_1685156	ADCY6	0.0229027	1.36566
ILMN_1796762	CCDC102A	0.031085	1.3651
ILMN_1660519	C3orf70	0.00256584	1.36502
ILMN_1658504	CHKA	0.0139173	1.36487
ILMN_1783546	CARKD	0.0264384	1.36459
ILMN_1697827	ATP2A3	0.0440029	1.36458
ILMN_1802053	ZNF91	0.0433646	1.36443
ILMN_1806907	PAWR	0.0131311	1.36383
ILMN_1673529	AGXT2L2	0.0174793	1.36357
ILMN_1788942	GGT6	0.0138745	1.36348
ILMN_1778013	PDPR	0.00942479	1.36329
ILMN_1840316		0.0082946	1.36246
ILMN_1695687	SALL4	0.0148502	1.36246
ILMN_1789233	VPS37C	0.0312648	1.36222
ILMN_1664283	C9orf75	0.0180456	1.36187
ILMN_1815024	PRDX5	0.0109441	1.36107
ILMN_1683905	C19orf21	0.0388968	1.36097
ILMN_1703650	TNIP1	0.0178063	1.3606
ILMN_1664798	GRHPR	0.012537	1.36019
ILMN_1776925	PRSS22	0.024449	1.36017
ILMN_1760011	GTF2IRD2B	0.0117204	1.35958
ILMN_1735180	NCSTN	0.00918978	1.35939
ILMN_1674941	ANO6	0.0248009	1.35925
ILMN_1798790	IL17RC	0.0102172	1.35866
ILMN_1779147	ENC1	0.0270099	1.3583
ILMN_1757370	SMPD1	0.00848558	1.35828
ILMN_1712687	PAK2	0.0400609	1.35756
ILMN_1667551	GUSBL1	0.00837807	1.35676
ILMN_1754795	FAT1	0.00550454	1.35672
ILMN_1675695	PDS5B	0.0182831	1.35657
ILMN_1684497	C10orf33	0.0365299	1.35645
ILMN_1709549	PLEKHM1	0.0295982	1.35625
ILMN_1804938	GPR175	0.00664596	1.35599
ILMN_1811468	IRX3	0.0104214	1.35574
ILMN_1809141	ING4	0.00173531	1.35528
ILMN_1740466	FAM46A	0.00411374	1.35526
ILMN_1652280	FBXO32	0.0282065	1.35474
ILMN_1773885	DMAP1	0.00268652	1.35398
ILMN_1699856	RALGDS	0.00532819	1.35365
ILMN_1651800	GSTM4	0.0249954	1.35352
ILMN_1788540	LOC732075	0.0166992	1.35351
ILMN_1755643	MGAT4A	0.0315859	1.35329
ILMN_1673518	BRWD1	0.00177081	1.35319
ILMN_1688780	S100A4	0.00727233	1.3528
ILMN_1721411	PARP10	0.0398279	1.35216
ILMN_1666050	TMUB1	0.0120732	1.35207
ILMN_1753426	KIAA0556	0.00359511	1.35204
ILMN_1779401	CHP	0.00979057	1.35186
ILMN_1778202	FLJ40722	0.0168315	1.35176
ILMN_1771233	CHMP4B	0.00101586	1.3515
ILMN_1776094	PPCS	0.0360299	1.35134
ILMN_1708486	CNN2	0.0312016	1.35124
ILMN_1789614	TPT1	0.015569	1.3512
ILMN_1680624	CREG1	0.0310928	1.35092
ILMN_1747067	NPAS1	0.0118384	1.35089
ILMN_1787885	NUDT18	0.0110314	1.3507
ILMN_1704195	FUK	0.0190043	1.3505
ILMN_1712673	SASH1	0.00500904	1.35018
ILMN_1716237	ACOT2	0.0125229	1.35001
ILMN_1780236	PMM1	0.0372043	1.34995
ILMN_1713688	DHX32	0.011193	1.34948
ILMN_1671427	FBXW4	0.00212063	1.34859
ILMN_1670452	ANKRD20A1	0.02939	1.34852
ILMN_1709847	KCNJ13	0.00430133	1.34837
ILMN_1785644	C20orf29	0.0045289	1.34819
ILMN_1679949	SLC25A23	0.0331657	1.3477
ILMN_1749109	PSAP	0.0360812	1.3476
ILMN_1708787	ZNF627	0.0153508	1.34684
ILMN_1722738	ROGDI	0.0215138	1.34638
ILMN_1658053	DYNLRB1	0.0221129	1.34637
ILMN_1737475	ABHD11	0.0336591	1.34626
ILMN_1671260	GPR177	0.00906681	1.34617
ILMN_1714384	PCCA	0.0041762	1.34607
ILMN_1783675	ASB8	0.0140696	1.34551
ILMN_1773809	FOXP4	0.0133977	1.34529
ILMN_1751431	WIBG	0.0350603	1.34527
ILMN_1690040	TM7SF2	0.0222632	1.34524
ILMN_1695852	C5orf38	0.00758147	1.34489
ILMN_1893511		0.0347737	1.34456
ILMN_1728605	TTC3	0.0469868	1.34432
ILMN_1740772	APBB3	0.0303469	1.34401
ILMN_1750674	SDSL	0.0103321	1.34334
ILMN_1675848	MYL12A	0.00340097	1.34286
ILMN_1688070	NSUN5C	0.0215342	1.34284
ILMN_1815308	SDC1	0.00252129	1.34274
ILMN_1763467	LY6G5C	0.00674585	1.34266
ILMN_1746883	SAT2	0.0168496	1.34256
ILMN_1716687	TPM1	0.0180456	1.34227
ILMN_1779014	TSPYL1	0.0394574	1.34167
ILMN_1839750	LOC729776	0.00347389	1.3414
ILMN_1740010	PCNX	0.0205146	1.34133
ILMN_1663618	STAT3	0.0104733	1.34122
ILMN_1669484	WDR6	0.0125909	1.34109
ILMN_1758105	ZNF791	0.0442007	1.34
ILMN_1740960	MACROD1	0.0121217	1.33849
ILMN_1812557	CDK5RAP3	0.0330676	1.33838
ILMN_1673798	PPOX	0.000820344	1.33795
ILMN_1670385	TUBAL3	0.00289158	1.33776
ILMN_1738955	C10orf104	0.0117241	1.33695
ILMN_1749424	C21orf122	0.0026984	1.33652
ILMN_1745620	KRCC1	0.0491206	1.33625
ILMN_1671885	MLF2	0.00699723	1.33606
ILMN_1902658		0.00658157	1.33605
ILMN_1731107	CCDC92	0.0112024	1.33597
ILMN_1751330	RBCK1	0.00780561	1.33522
ILMN_1726928	TCEA3	0.00991824	1.33516
ILMN_1813763	SLC20A2	0.0253194	1.33505
ILMN_1721651	LOC646463	0.00760711	1.33479
ILMN_1686254	FAM127B	0.0371618	1.33438
ILMN_1808011	FAM46B	0.0178626	1.33427
ILMN_1774261	DOK4	0.00725178	1.33401
ILMN_1767651	TECPR1	0.00256584	1.33362
ILMN_1794187	FBXL3	0.0338258	1.33342
ILMN_1710844	PARP10	0.0055779	1.33193
ILMN_1812616	MYO1C	0.0383866	1.33172
ILMN_1796180	CRY2	0.0235699	1.33168
ILMN_1724946	SPINT1	0.00118721	1.33166
ILMN_1767475	CERK	0.00705945	1.33104
ILMN_1663401	LARP6	0.00811722	1.33093
ILMN_1810467	PPP2R1A	0.0244182	1.3309
ILMN_1694514	ZDHHC11	0.025621	1.33084
ILMN_1737644	TMEM219	0.00535118	1.33078
ILMN_1805765	CMYA5	0.00602653	1.33052
ILMN_1669696	ZNF792	0.00488749	1.33032
ILMN_1803018	KIFC2	0.00674585	1.33022
ILMN_1766446	C6orf48	0.0222243	1.32992
ILMN_1716616	MARVELD3	0.0221102	1.32962
ILMN_1667948	SPATA18	0.0167002	1.32961
ILMN_1705261	CAPN1	0.0420634	1.32957
ILMN_1736577	ZNF688	0.018689	1.32951
ILMN_1765574	TFAP2A	0.00121037	1.32898
ILMN_1732609	KIAA1539	0.0127776	1.32882
ILMN_1705346	NBEA	0.00176981	1.32874
ILMN_1778173	AK3	0.0127563	1.32862
ILMN_1694847	TERF1	0.0111248	1.32801
ILMN_1681679	TSPO	0.0327457	1.32744
ILMN_1681845	PAPD4	0.0238671	1.32715
ILMN_1780698	ZFYVE19	0.0423809	1.3269
ILMN_1770425	CDIPT	0.0263908	1.32646
ILMN_1753472	SUMF1	0.0360812	1.32623
ILMN_1755138	NEK8	0.0393438	1.32614
ILMN_1702125	HOXB7	0.00720462	1.32599
ILMN_1703132	LYRM2	0.0163565	1.32551
ILMN_1718607	TSPAN4	0.00587799	1.32535
ILMN_1654320	LOC644250	0.0226155	1.32527
ILMN_1773906	NCOA4	0.00366085	1.32512
ILMN_1651735	TGOLN2	0.00725303	1.32474
ILMN_1774982	CDC42EP5	0.00284789	1.32472
ILMN_1743131	TOX4	0.0062592	1.32466
ILMN_1736112	ARHGAP10	0.0423809	1.32448
ILMN_1762747	RPL15	0.012784	1.32443
ILMN_1654518	LRCH4	0.0213202	1.3244
ILMN_1704376	GLDN	0.00592622	1.3242
ILMN_1719826	LOC441956	0.0100592	1.32365
ILMN_1682818	TTLL3	0.0105658	1.32362
ILMN_1812031	PALM	0.0321639	1.3235
ILMN_1804332	GPR137	0.0115694	1.32347
ILMN_1858599		0.0131311	1.32272
ILMN_1691410	BAMBI	0.00704649	1.3225
ILMN_1706960	KIAA1217	0.00225533	1.32217
ILMN_1691884	STC2	0.04869	1.32209
ILMN_1675483	ANKMY1	0.00624282	1.32186
ILMN_1757847	C11orf68	0.00604514	1.32168
ILMN_1716821	GORASP1	0.0334142	1.3214
ILMN_1756501	ST6GAL1	0.0191492	1.32136
ILMN_1731237	CLSTN2	0.025153	1.32132
ILMN_1737715	OSR2	0.0235672	1.3212
ILMN_1799015	PXMP2	0.0404724	1.32107
ILMN_1795342	MLPH	0.0404724	1.32068
ILMN_1728983	NR2C1	0.0149968	1.32062
ILMN_1794230	SCAND1	0.0055779	1.31986
ILMN_1741392	SLC25A20	0.00709681	1.31958
ILMN_1725700	MOV10	0.00775705	1.31953
ILMN_1695606	EFNB3	0.0154987	1.31937
ILMN_1748911	SNAP23	0.0026984	1.31929
ILMN_1746948	MYL5	0.0448672	1.31903
ILMN_1671742	UPF3A	0.0113807	1.31895
ILMN_1742789	LPXN	0.00373214	1.31893
ILMN_1760490	ACVR1	0.00727233	1.31837
ILMN_1674135	RALGPS1	0.00909526	1.31823
ILMN_1759595	C22orf29	0.00477187	1.31817
ILMN_1801934	SERTAD3	0.017298	1.31801
ILMN_1738921	ACAA1	0.00617269	1.31768
ILMN_1717248	C9orf66	0.020117	1.31743
ILMN_1793290	WDR60	0.0068677	1.31742
ILMN_1685722	EIF4A2	0.00732077	1.31732
ILMN_1755721	FAM63A	0.0228869	1.31653
ILMN_1707336	ARPC4	0.0388309	1.31651
ILMN_1730347	CCDC115	0.00225533	1.31638
ILMN_1812721	LOC728014	0.049322	1.31627
ILMN_1691290	CELSR3	0.0303321	1.31623
ILMN_1777170	LOC440585	0.0225378	1.31589
ILMN_1674034	H2AFY	0.0161441	1.31569
ILMN_1753265	C12orf76	0.0151272	1.31496
ILMN_1802205	RHOB	0.0129749	1.3147
ILMN_1807455	DHRS7	0.0353619	1.31428
ILMN_1713985	MAF1	0.0308769	1.31427
ILMN_1701655	SLC24A6	0.0425878	1.31414
ILMN_1676891	CDC2L6	0.0370235	1.31394
ILMN_1785528	FAM39DP	0.0117241	1.31372
ILMN_1655922	SAPS2	0.0118479	1.3134
ILMN_1688702	PJA2	0.0471899	1.31271
ILMN_1761882	C3orf14	0.0340588	1.31182
ILMN_1717674	PEPD	0.00202008	1.31181
ILMN_1750563	CERCAM	0.0231947	1.31077
ILMN_1653828	CHFR	0.00257641	1.31038
ILMN_1676302	FAM113A	0.0210691	1.31035
ILMN_1769637	RNMT	0.00700864	1.31019
ILMN_1665775	MOSC2	0.00952331	1.30995
ILMN_1738229	NDRG3	0.0423361	1.30975
ILMN_1666004	WASL	0.011407	1.30889
ILMN_1770977	TMEM134	0.0226449	1.30823
ILMN_1665235	CRTAP	0.0416978	1.30775
ILMN_1712577	FAM174A	0.0173474	1.30768
ILMN_1722056	ATP7B	0.0079129	1.30767
ILMN_1752579	ATP6V0A1	0.0146217	1.30765
ILMN_1694111	PNKP	0.00916095	1.30747
ILMN_1785175	SWAP70	0.0062028	1.30697
ILMN_1733627	NEDD4L	0.00862394	1.30697
ILMN_1671565	RNASET2	0.0177599	1.30625
ILMN_1711408	ANXA4	0.0223411	1.30596
ILMN_1767816	APH1B	0.0181518	1.30516
ILMN_1773154	NFKBIA	0.00976379	1.30489
ILMN_1697629	PLA2G4B	0.0447858	1.30485
ILMN_1903021		0.0104858	1.30458
ILMN_1803953	LOC388789	0.0343971	1.30431
ILMN_1674629	C9orf3	0.0013745	1.30409
ILMN_1799128	SLC30A9	0.00739084	1.30402
ILMN_1682783	TUG1	0.0410883	1.30385
ILMN_1714461	RNF14	0.0443024	1.30373
ILMN_1667030	HSBP1	0.0153944	1.30367
ILMN_1694533	RMND1	0.028598	1.30328
ILMN_1663685	DGCR6	0.018731	1.30279
ILMN_1677824	RAB4A	0.0055779	1.30261
ILMN_1656656	COX19	0.0219432	1.3019
ILMN_1744912	CTTN	0.0370235	1.30184
ILMN_1707070	PCOLCE	0.0420937	1.3017
ILMN_1810915	FAAH	0.00192252	1.30163
ILMN_1802251	PTTG1IP	0.0476089	1.301
ILMN_1664738	C11orf54	0.0143278	1.30099
ILMN_1683175	C9orf23	0.0053119	1.29948
ILMN_1743187	C6orf120	0.00766941	1.2993
ILMN_1666976	PLD3	0.0231947	1.29857
ILMN_1694708	LOC650737	0.0464849	1.29828
ILMN_1813746	CORO2A	0.0153508	1.2982
ILMN_1719343	WDR26	0.0404584	1.29756
ILMN_1800626	SESN1	0.00154752	1.29671
ILMN_1657893	TXNRD2	0.0153508	1.29668
ILMN_1715635	ATP6V0E1	0.0251525	1.29668
ILMN_1912083		0.0324711	1.29649
ILMN_1721241	PSCD2	0.0376988	1.29636
ILMN_1704286	FXYD5	0.00195929	1.29631
ILMN_1708805	NCOA3	0.0411455	1.29626
ILMN_1795429	VCL	0.00436293	1.29579
ILMN_1654060	MKNK2	0.00305486	1.29472
ILMN_1768510	MAN2B2	0.0290545	1.29444
ILMN_1764457	LOC339766	0.048	1.29385
ILMN_1658639	SLC46A3	0.00604649	1.29373
ILMN_1761086	VPS54	0.0168315	1.29326
ILMN_1789751	MFSD1	0.0481394	1.29264
ILMN_1739751	SLC26A11	0.0108718	1.29236
ILMN_1657632	ZMYM6	0.0476898	1.29208
ILMN_1659649	SGCG	0.0143135	1.29153
ILMN_1769250	ARFGAP2	0.0215154	1.29147
ILMN_1741180	HEXDC	0.00459248	1.29134
ILMN_1737561	LOC88523	0.0222573	1.29114
ILMN_1651826	BASP1	0.00710518	1.29113
ILMN_1772700	TMEM18	0.0147679	1.29103
ILMN_1726466	HDHD3	0.0210439	1.29099
ILMN_2038772	RPS9	0.0315859	1.29083
ILMN_1680104	SLC35C1	0.00680185	1.29082
ILMN_1739885	SLC41A3	0.0187943	1.29076
ILMN_1798620	PQLC1	0.0136825	1.29029
ILMN_1763688	C17orf49	0.0479118	1.2902
ILMN_1721712	SYNGR1	0.0315859	1.29005
ILMN_1810559	RHOQ	0.0220066	1.29002
ILMN_1748090	SLC2A11	0.00908459	1.28989
ILMN_1792710	DAPK3	0.00707668	1.28936
ILMN_1664978	TJP2	0.00886299	1.28902
ILMN_1754842	DLGAP4	0.0331995	1.28811
ILMN_1796113	BCDIN3D	0.0138745	1.28769
ILMN_1699772	RRAGD	0.00526696	1.28761
ILMN_1783598	CAB39L	0.00674585	1.2876
ILMN_1733453	LOC284988	0.00195929	1.28758
ILMN_1703335	LACTB	0.00622792	1.28736
ILMN_1655748	ZNF323	0.00526696	1.28731
ILMN_1665510	ERRFI1	0.0100477	1.28731
ILMN_1741491	ZNHIT1	0.0187943	1.28702
ILMN_1812769	UBXN1	0.0012983	1.28701
ILMN_1680757	LRRC26	0.0299637	1.28669
ILMN_1807016	LHX2	0.0347737	1.28644
ILMN_1733519	HMGB3	0.0179169	1.28606
ILMN_1754600	FNBP1L	0.00824454	1.28567
ILMN_1680501	GTF2IRD2B	0.0316924	1.28545
ILMN_1669928	ARHGEF16	0.00646357	1.2854
ILMN_1764508	PTK6	0.00848558	1.28507
ILMN_1669878	GUSB	0.0231947	1.28498
ILMN_1786766	SNTB2	0.0382736	1.28474
ILMN_1758938	SLC31A2	0.0254666	1.28459
ILMN_1697793	SYNJ2BP	0.00779619	1.2844
ILMN_1656297	C21orf57	0.0490887	1.28421
ILMN_1742003	RHPN1	0.0180898	1.28402
ILMN_1713990	TRIP6	0.0338368	1.28393
ILMN_1814971	TCF25	0.0431052	1.28354
ILMN_1675266	NAGPA	0.002671	1.28304
ILMN_1800540	CD55	0.0466386	1.28296
ILMN_1705861	AP1M2	0.00269522	1.2828
ILMN_1691432	PRDM4	0.0142357	1.28271
ILMN_1714393	RAB24	0.0173184	1.28239
ILMN_1690320	TTC23	0.0251525	1.28223
ILMN_1865764		0.00430193	1.28217
ILMN_1752935	TMEM30B	0.00678047	1.28151
ILMN_1872419		0.0397653	1.28144
ILMN_1685398	BAD	0.0288643	1.28142
ILMN_1792176	TADA3	0.0395524	1.28142
ILMN_1703314	KLHL36	0.0360812	1.28107
ILMN_1697006	LOC642361	0.0437408	1.28061
ILMN_1762281	DCTN3	0.011352	1.28046
ILMN_1785661	FAM108B1	0.0265695	1.28034
ILMN_1688103	CTNNBIP1	0.0237748	1.28025
ILMN_1684446	SPAG7	0.0321544	1.27985
ILMN_1727479	TPRG1L	0.0496806	1.27875
ILMN_1773901	STX12	0.0236797	1.27861
ILMN_1666376	TRIM56	0.0207468	1.27849
ILMN_1744534	LYRM5	0.0492873	1.27832
ILMN_1682781	TEAD2	0.0263765	1.27828
ILMN_1769412	RAPGEF1	0.025153	1.27808
ILMN_1683980	PLEKHM2	0.0226155	1.27803
ILMN_1722726	RICS	0.0419694	1.27799
ILMN_1719010	ARL4D	0.0135347	1.27794
ILMN_1756006	ATG2A	0.00619608	1.27732
ILMN_1671221	GAPVD1	0.00341462	1.27726
ILMN_1752988	C11orf17	0.0479118	1.27703
ILMN_1691393	DNPEP	0.00674585	1.2769
ILMN_1766762	DYNLRB1	0.0222243	1.27621
ILMN_1882590		0.0272524	1.27606
ILMN_1761068	MGC52000	0.0167892	1.27474
ILMN_1771728	PXMP4	0.0121462	1.27444
ILMN_1668514	PIP5K1C	0.0400859	1.2742
ILMN_1807031	C14orf28	0.00561435	1.27405
ILMN_1724666	INADL	0.00556829	1.27367
ILMN_1683660	EIF3H	0.0379339	1.27351
ILMN_1745497	C12orf26	0.0231929	1.27277
ILMN_1772466	SH2D3A	0.0241097	1.27273
ILMN_1752665	ELMO3	0.00709681	1.27235
ILMN_1663080	LFNG	0.00320845	1.2722
ILMN_1785785	NCOA1	0.0302321	1.27215
ILMN_1723969	PLCB1	0.0481647	1.27154
ILMN_1688180	ASPSCR1	0.00286705	1.27027
ILMN_1795317	SCAND1	0.0129465	1.27023
ILMN_1787923	PNPLA2	0.00906865	1.26961
ILMN_1756469	GAMT	0.0388848	1.26893
ILMN_1676631	CCNO	0.0497351	1.26892
ILMN_1708905	LOC374443	0.0150336	1.26887
ILMN_1790534	MAP2K3	0.0343971	1.26825
ILMN_1665982	AKTIP	0.0026984	1.26783
ILMN_1802971	FAM160B2	0.0229027	1.26755
ILMN_1722634	NUCB1	0.0395527	1.2675
ILMN_1699931	HCST	0.0254437	1.26746
ILMN_1733110	RASSF7	0.00126348	1.2674
ILMN_1656482	OSBPL2	0.0462333	1.26722
ILMN_1660864	RHBDL1	0.0237886	1.26664
ILMN_1774077	GBP2	0.0258071	1.26617
ILMN_1787186	NOV	0.00468289	1.26612
ILMN_1663454	PKP1	0.0498528	1.26573
ILMN_1684964	ZNF212	0.0342834	1.26544
ILMN_1661595	C1orf53	0.0371618	1.26521
ILMN_1732717	FAM71E1	0.0289813	1.265
ILMN_1757552	PTRF	0.0150898	1.26495
ILMN_1672589	SEMA4B	0.0153944	1.26469
ILMN_1713301	DGCR2	0.0134225	1.2646
ILMN_1721106	C14orf159	0.0226867	1.26384
ILMN_1729546	C19orf54	0.00641235	1.26362
ILMN_1759460	TAF7	0.0303617	1.26343
ILMN_1721605	SMYD2	0.00780561	1.26294
ILMN_1742705	SLC39A11	0.0130071	1.26243
ILMN_1658301	FAM83E	0.00666198	1.26235
ILMN_1662741	EDG4	0.00136707	1.26222
ILMN_1800739	SPINT2	0.0119902	1.26214
ILMN_1688886	GPC5	0.0113626	1.26212
ILMN_1718128	PABPC3	0.0038989	1.26211
ILMN_1659240	MTMR14	0.0186924	1.26183
ILMN_1720829	ZFP36	0.0212769	1.26183
ILMN_1697820	HINT2	0.0341294	1.26147
ILMN_1708047	LOC648581	0.0256834	1.26139
ILMN_1658486	MRPL54	0.033725	1.26076
ILMN_1782084	ALG1L	0.0263655	1.26
ILMN_1738704	TRIM26	0.0497033	1.25995
ILMN_1888074		0.0130617	1.25968
ILMN_1772888	LOC645688	0.0149386	1.25965
ILMN_1871457		0.0404584	1.25947
ILMN_1730256	GNG13	0.019831	1.25938
ILMN_1669032	PPIC	0.0495485	1.25931
ILMN_1657771	CRTC2	0.00725303	1.25928
ILMN_1668582	CRBN	0.0446605	1.25917
ILMN_1806293	LIN7A	0.0234315	1.25908
ILMN_1700109	PTOV1	0.0407901	1.25887
ILMN_1687303	ACAD10	0.0045289	1.25866
ILMN_1690625	SLC9A8	0.0465259	1.25798
ILMN_1768449	PRPSAP1	0.0127845	1.25791
ILMN_1694757	CTSL1	0.0232565	1.25773
ILMN_1754179	AP1G2	0.0455595	1.25751
ILMN_1778371	CCBL2	0.00284304	1.25737
ILMN_1684956	ARSD	0.0188557	1.25736
ILMN_1758915	PDCD2	0.0430682	1.25736
ILMN_1773567	LAMA5	0.017959	1.2573
ILMN_1779032	LOC642502	0.0299637	1.25694
ILMN_1813682	MRPL53	0.0255403	1.25692
ILMN_1741219	RRAGB	0.00440196	1.2567
ILMN_1672947	CAST	0.00559105	1.25595
ILMN_1723358	SCARA3	0.0409875	1.25541
ILMN_1810191	PLA2G4C	0.0120156	1.25535
ILMN_1683313	ST3GAL1	0.0191042	1.25531
ILMN_1799969	SNAPIN	0.00858715	1.25478
ILMN_1658835	CAV2	0.00711461	1.25452
ILMN_1741455	USP30	0.0212128	1.25432
ILMN_1683065	C2orf64	0.0393374	1.254
ILMN_1727805	SYNGR1	0.0132608	1.25282
ILMN_1740762	GRB7	0.0230803	1.25265
ILMN_1658425	DAG1	0.0479043	1.25203
ILMN_1808202	C19orf22	0.00526135	1.25193
ILMN_1664912	IL11RA	0.0402903	1.25187
ILMN_1692133	ZNF226	0.0385305	1.25116
ILMN_1763080	QARS	0.0471899	1.25057
ILMN_1651278	SNIP1	0.0191042	1.25029
ILMN_1757845	SPIRE1	0.0257689	1.25001
ILMN_1811102	LRSAM1	0.0172509	1.24985
ILMN_1781097	UBXN4	0.0332606	1.24898
ILMN_1755582	PCSK1N	0.00846836	1.2489
ILMN_1686135	CCDC45	0.0448451	1.24884
ILMN_1688318	MGC72104	0.00734439	1.24866
ILMN_1755649	SLC16A5	0.00522837	1.24854
ILMN_1772876	ZNF395	0.0256834	1.24797
ILMN_1781996	NUDT16	0.00899059	1.24784
ILMN_1696276	ZNF653	0.0138828	1.24773
ILMN_1683827	VPS24	0.0104214	1.24724
ILMN_1654262	ZMAT3	0.0156402	1.24685
ILMN_1785413	ATP2C2	0.0428405	1.24643
ILMN_1724825	PCBP2	0.00191034	1.24635
ILMN_1776879	HMGN2	0.0307777	1.24612
ILMN_1756408	PARVA	0.0181318	1.24605
ILMN_1724897	C14orf93	0.00824215	1.24588
ILMN_1657436	FGFR1OP2	0.0390807	1.24565
ILMN_1684306	S100A4	0.033292	1.24526
ILMN_1669516	ZNF193	0.0203855	1.245
ILMN_1661804	CTF1	0.0318964	1.24425
ILMN_1859863		0.0195916	1.24397
ILMN_1741055	NUP210L	0.0440923	1.24206
ILMN_1745887	FBXO21	0.044536	1.24202
ILMN_1785703	LMOD3	0.0241097	1.24151
ILMN_1803774	STK16	0.0469868	1.24122
ILMN_1783852	CD164	0.0382071	1.24099
ILMN_1659099	ROCK2	0.0477886	1.24098
ILMN_1747146	TSG101	0.0412018	1.24039
ILMN_1745329	PRR14	0.0369861	1.23991
ILMN_1688228	LOC145837	0.0153386	1.2398
ILMN_1652525	FAM125B	0.00705945	1.23975
ILMN_1691930	CBX6	0.0226867	1.23955
ILMN_1696991	DYRK1B	0.0295098	1.23852
ILMN_1729801	S100A8	0.00397771	1.23821
ILMN_1735156	SLC4A11	0.00932496	1.23817
ILMN_1793118	TAX1BP1	0.00114767	1.23803
ILMN_1798659	CCDC28A	0.0119131	1.23775
ILMN_1755281	FBXO15	0.0189904	1.23773
ILMN_1717234	CAST	0.0117559	1.23747
ILMN_1735353	IRX1	0.00482949	1.23705
ILMN_1731609	CHMP6	0.0130617	1.23703
ILMN_1680239	NUDT9	0.0395524	1.23699
ILMN_1685140	PRRC1	0.0491206	1.23635
ILMN_1786328	WDR40A	0.012537	1.23628
ILMN_1685289	C16orf58	0.0456685	1.23557
ILMN_1673282	LAMP2	0.0226155	1.23547
ILMN_1662161	TBC1D13	0.0280159	1.23519
ILMN_1719664	PTPN21	0.014915	1.23431
ILMN_1653711	FZD2	0.0039065	1.23423
ILMN_1674703	UBE1DC1	0.0281058	1.23416
ILMN_1714417	PSEN2	0.0253846	1.23373
ILMN_1742427	POLR1D	0.0377673	1.23325
ILMN_1905075		0.0338526	1.23319
ILMN_1653934	LOC650517	0.00495687	1.23295
ILMN_1775822	PDGFB	0.00818614	1.23213
ILMN_1772540	ATMIN	0.0355818	1.23145
ILMN_1752199	LHPP	0.031504	1.23134
ILMN_1754235	SLC35C2	0.0378771	1.23116
ILMN_1665331	AMT	0.0487255	1.23105
ILMN_1809695	CAMK2G	0.0498797	1.23098
ILMN_1710482	APLP2	0.0404689	1.23096
ILMN_1653718	ZFAND2B	0.00447666	1.23088
ILMN_1662358	MX1	0.0423809	1.23067
ILMN_1750400	C19orf66	0.0404724	1.23016
ILMN_1726893	EPN3	0.0276895	1.22953
ILMN_1686562	KIF13B	0.0124025	1.22935
ILMN_1714599	CAMLG	0.0217913	1.22918
ILMN_1723123	FGFR3	0.018364	1.22899
ILMN_1664265	EPHA1	0.0180898	1.22881
ILMN_1718070	CASP9	0.00744798	1.22875
ILMN_1718646	MMP15	0.0348154	1.22807
ILMN_1710284	HES1	0.0312016	1.22805
ILMN_1889555		0.0138586	1.22801
ILMN_1741572	AKAP8	0.0482345	1.22768
ILMN_1691458	SYPL1	0.0252561	1.22756
ILMN_1727778	NTNG1	0.00230864	1.22709
ILMN_1724211	GPRC5C	0.0330676	1.2264
ILMN_1710756	ENO1	0.0352375	1.22592
ILMN_1804834	C6orf130	0.0452027	1.22551
ILMN_1663866	TGFBI	0.0365299	1.22529
ILMN_1677919	GMPR2	0.0447858	1.22473
ILMN_1759252	ADD1	0.00145655	1.22463
ILMN_1739335	LOC400948	0.0144434	1.22411
ILMN_1722025	CPEB4	0.0416215	1.22401
ILMN_1691942	CCNI	0.0264047	1.22385
ILMN_1813399	ATP2B1	0.0101008	1.22376
ILMN_1678781	SNX26	0.031085	1.22369
ILMN_1793241	SRD5A1	0.0215406	1.22321
ILMN_1688452	LCMT1	0.025153	1.22311
ILMN_1816713		0.0296654	1.22273
ILMN_1675612	BLCAP	0.048	1.2225
ILMN_1795428	WDR59	0.0286471	1.22228
ILMN_1801600	CCDC97	0.00915937	1.22128
ILMN_1709265	RNF170	0.0423809	1.22128
ILMN_1695917	C5orf15	0.0488449	1.22116
ILMN_1803143	SYVN1	0.00286705	1.22088
ILMN_1691436	BLVRA	0.00434316	1.22088
ILMN_1670130	ARID3A	0.0469868	1.22058
ILMN_1821517		0.0032923	1.22029
ILMN_1728298	SBK1	0.00418628	1.22012
ILMN_1690695	PEX11A	0.0370448	1.21953
ILMN_1652379	SUCLG2	0.034957	1.2194
ILMN_1693242	ZNF296	0.00652995	1.21904
ILMN_1729495	TRIM41	0.0320399	1.21904
ILMN_1703564	DYNLRB1	0.0469868	1.21901
ILMN_1799614	PNPLA6	0.00857471	1.21899
ILMN_1791232	SPRED2	0.0490065	1.2182
ILMN_1721093	TAF10	0.0301635	1.21797
ILMN_1720857	GUSBL1	0.0276578	1.21794
ILMN_1777663	TOP2B	0.0341294	1.21787
ILMN_1656934	REPS2	0.00242618	1.21741
ILMN_1672000	LOC642460	0.0147475	1.21722
ILMN_1803838	CNFN	0.040797	1.21652
ILMN_1789136	SERF2	0.0185866	1.21602
ILMN_1815086	NINJ1	0.0168315	1.2158
ILMN_1727248	INF2	0.019376	1.21542
ILMN_1750429	MKNK1	0.0189904	1.21491
ILMN_1725108	SNX25	0.0257689	1.21433
ILMN_1728676	KIAA0196	0.00320562	1.2142
ILMN_1679641	FAM120B	0.0195946	1.21365
ILMN_1652407	ZMYND8	0.0473933	1.21351
ILMN_1695157	CA4	0.0496806	1.213
ILMN_1768311	LOC728888	0.00921366	1.21265
ILMN_1788149	NEK11	0.0327836	1.21256
ILMN_1776724	LYPD6	0.0254241	1.21195
ILMN_1652445	RAC1	0.0413806	1.21167
ILMN_1743763	TJAP1	0.0313679	1.21154
ILMN_1713764	LOC440928	0.0278611	1.21074
ILMN_1687092	KBTBD4	0.00908459	1.21073
ILMN_1713952	C1orf106	0.0426528	1.20989
ILMN_1720476	PHF2	0.0218835	1.20943
ILMN_1806705	ASB6	0.0145984	1.20928
ILMN_1702065	MFSD5	0.0426189	1.20904
ILMN_1802519	VPS36	0.0147786	1.20889
ILMN_1811387	TFF3	0.0125909	1.208
ILMN_1797684	PDCD2	0.00829142	1.20796
ILMN_1707943	C19orf39	0.0338762	1.20787
ILMN_1781251	LOC653115	0.0094923	1.20783
ILMN_1693664	POMGNT1	0.0448916	1.20737
ILMN_1801616	EMP1	0.0193192	1.20713
ILMN_1716678	NPC2	0.030253	1.2071
ILMN_1777221	C21orf51	0.0357215	1.20679
ILMN_1812478	ZNHIT3	0.00659563	1.20646
ILMN_1706015	FAM43A	0.018137	1.20562
ILMN_1761155	PABPC1	0.0311959	1.20468
ILMN_1682699	PBX2	0.0485845	1.20467
ILMN_1665219	LTBP4	0.0278065	1.2045
ILMN_1654324	HEYL	0.00325628	1.20375
ILMN_1759732	RFNG	0.00256584	1.20369
ILMN_1798980	CAPZB	0.00767468	1.20354
ILMN_1695821	ACTR1B	0.020147	1.20116
ILMN_1812571	RAB35	0.0232384	1.20102
ILMN_1681634	PXMP2	0.0167038	1.19995
ILMN_1810729	UBL3	0.0180375	1.19944
ILMN_1723768	NLRX1	0.0191392	1.19911
ILMN_1688772	C8orf51	0.0136095	1.19886
ILMN_1790881	HNMT	0.0271185	1.19886
ILMN_1669497	OSBPL10	0.0297117	1.1988
ILMN_1761531	SGPL1	0.0484016	1.19874
ILMN_1825773		0.0430396	1.19801
ILMN_1661683	THRA	0.00712147	1.19658
ILMN_1784113	NAT14	0.0332606	1.19637
ILMN_1651832	EHD1	0.0082946	1.19635
ILMN_1651788	MAP3K11	0.0312648	1.19627
ILMN_1894057		0.0225926	1.19604
ILMN_1809708	KCTD21	0.0350177	1.19592
ILMN_1716973	POLM	0.00995218	1.1954
ILMN_1765833	SLC9A3R2	0.0443779	1.19508
ILMN_1889811		0.0426897	1.19444
ILMN_1658830	C10orf26	0.0277791	1.19423
ILMN_1787718	SLC27A1	0.0318849	1.19376
ILMN_1758943	FAM5C	0.00366085	1.19371
ILMN_1698213	RBM3	0.0401979	1.19359
ILMN_1755411	RBMS2	0.00170455	1.1935
ILMN_1772722	MRPS33	0.0320948	1.193
ILMN_1808860	STX5	0.0440029	1.19296
ILMN_1762003	SEC62	0.0383866	1.19289
ILMN_1776515	MPPE1	0.0410455	1.19269
ILMN_1679917	ARL16	0.017148	1.19167
ILMN_1672042	DOLPP1	0.0448496	1.19132
ILMN_1791531	FA2H	0.0423809	1.19108
ILMN_1762207	SGSM1	0.0360812	1.19074
ILMN_1804007	NANOS3	0.0426897	1.19023
ILMN_1680693	ZNF419	0.0237748	1.18909
ILMN_1740351	KIAA0174	0.0464849	1.18848
ILMN_1654890	LENG8	0.00681791	1.18797
ILMN_1672807	CA5B	0.0277576	1.18771
ILMN_1719835	OSCP1	0.0377273	1.18722
ILMN_1789243	VPS33B	0.0143257	1.18688
ILMN_1753912	ABHD11	0.0157068	1.18671
ILMN_1808707	FSCN1	0.0484016	1.1867
ILMN_1755077	HEBP2	0.0123398	1.18656
ILMN_1660451	STARD13	0.0475165	1.18568
ILMN_1730082	RPUSD4	0.0337722	1.18551
ILMN_1788062	SH3GL1	0.0113807	1.18496
ILMN_1796682	PARP3	0.0426956	1.18491
ILMN_1736180	FRAT1	0.0338258	1.18444
ILMN_1680659	C11orf63	0.0303218	1.18426
ILMN_1884750		0.00984522	1.18378
ILMN_1678186	ATP6V0A4	0.0479118	1.18326
ILMN_1756849	HIST1H2AE	0.0412454	1.18257
ILMN_1666444	RBMS1	0.0443755	1.1822
ILMN_1735347	MCEE	0.0328558	1.18134
ILMN_1700518	HMGN4	0.0153386	1.18056
ILMN_1719972	PLXNA3	0.0333311	1.1804
ILMN_1763723	PTDSS2	0.0359228	1.17951
ILMN_1701940	FAM73B	0.00824454	1.17924
ILMN_1793616	RNF38	0.0345871	1.17905
ILMN_1786718	NDUFV1	0.0300075	1.17896
ILMN_1775016	MPZL2	0.0343971	1.17849
ILMN_1789909	TBC1D9B	0.0217531	1.17848
ILMN_1762407	CABLES2	0.0175623	1.17821
ILMN_1679256	AP3B2	0.0240236	1.17784
ILMN_1797530	CHCHD5	0.0127975	1.17754
ILMN_1800078	LMO2	0.0466386	1.17673
ILMN_1690282	CRADD	0.0270996	1.1767
ILMN_1651429	SELM	0.0113807	1.17633
ILMN_1897890		0.049242	1.17603
ILMN_1774382	NR2C1	0.00719491	1.17592
ILMN_1721704	FNTA	0.0295647	1.17551
ILMN_1682147	HOOK2	0.0249747	1.17543
ILMN_1693045	TMED1	0.0473933	1.17537
ILMN_1777915	STX6	0.046964	1.17529
ILMN_1798061	ZFYVE26	0.0094878	1.17525
ILMN_1693259	PDCD6IP	0.0199461	1.1751
ILMN_1762666	DHRS4	0.0387221	1.17395
ILMN_1669898	EGFL7	0.0215412	1.17384
ILMN_1782543	EEF1D	0.0409875	1.17351
ILMN_1670158	FAM83A	0.0461721	1.17347
ILMN_1735075	PGBD2	0.0362865	1.17341
ILMN_1720838	DECR1	0.0338012	1.17248
ILMN_1778560	ZNF3	0.00481976	1.17211
ILMN_1795118	SIDT1	0.0234713	1.17187
ILMN_1715543	ACOT1	0.0024645	1.17174
ILMN_1728498	PCBP4	0.029912	1.17063
ILMN_1783606	MLL5	0.0462431	1.17042
ILMN_1754990	LOC388720	0.026191	1.16973
ILMN_1697906	WBP4	0.0384613	1.16973
ILMN_1697962	NSMCE1	0.0352629	1.16921
ILMN_1807719	CTNS	0.0395899	1.16913
ILMN_1754553	MED19	0.0408295	1.16896
ILMN_1701375	FBXW5	0.0214069	1.16869
ILMN_1722811	CDKN1B	0.00963802	1.16848
ILMN_1774091	FECH	0.0232642	1.16823
ILMN_1695645	CETN2	0.0306854	1.16799
ILMN_1789809	LOC644511	0.0357215	1.16725
ILMN_1790637	C11orf80	0.0082946	1.16482
ILMN_1681675	RBM16	0.0388309	1.16451
ILMN_1800871	RAB6A	0.0108963	1.16449
ILMN_1743747	RUSC1	0.00586302	1.16438
ILMN_1685631	KIAA0892	0.00373214	1.16388
ILMN_1757604	TPM2	0.0130071	1.16325
ILMN_1858105		0.0499682	1.16286
ILMN_1692276	GGPS1	0.033793	1.16257
ILMN_1836218		0.0481647	1.16162
ILMN_1741711	DOPEY2	0.0298086	1.16144
ILMN_1773337	DKK1	0.0056849	1.16136
ILMN_1807514	ZNF394	0.0347737	1.16047
ILMN_1728360	MED29	0.0149748	1.16024
ILMN_1691499	TJP1	0.0417986	1.16005
ILMN_1751561	CAMK1D	0.0410952	1.15906
ILMN_1666399	RING1	0.00391855	1.15861
ILMN_1701204	VEGFC	0.0415874	1.15808
ILMN_1661778	MTL5	0.025153	1.15778
ILMN_1753608	TMEM131	0.018465	1.15729
ILMN_1756910	PLA2G15	0.0469868	1.15713
ILMN_1727135	FIBCD1	0.0283432	1.15708
ILMN_1721657	RSU1	0.0461773	1.15682
ILMN_1783709	RRAGA	0.0491206	1.1556
ILMN_1697529	RNF10	0.0117183	1.154
ILMN_1691428	PSMD12	0.0208226	1.15338
ILMN_1733970	BAG1	0.0342544	1.15284
ILMN_1809027	ATP5SL	0.00952219	1.15251
ILMN_1672660	MBP	0.0193525	1.15177
ILMN_1681437	DCXR	0.0360812	1.15124
ILMN_1800659	PGM1	0.0108511	1.15084
ILMN_1668825	DKFZp686I15217	0.0206117	1.15071
ILMN_1809522	NACC2	0.0148873	1.14954
ILMN_1765001	NAT6	0.00880494	1.14945
ILMN_1686906	TP53INP2	0.0470015	1.14729
ILMN_1807596	UBAP1	0.0371618	1.14616
ILMN_1780036	WDR1	0.0299354	1.14419
ILMN_1678531	N4BP3	0.0117241	1.14387
ILMN_1745148	ZNFX1	0.0456685	1.14382
ILMN_1667199	SQRDL	0.0410883	1.14288
ILMN_1759801	DPP8	0.0447858	1.14226
ILMN_1655126	PI4KAP2	0.0219063	1.1422
ILMN_1776109	ZNF622	0.0210799	1.14167
ILMN_1689123	CCNK	0.0383866	1.14047
ILMN_1738046	ZNF623	0.0430786	1.14015
ILMN_1805665	FLRT3	0.00481988	1.13989
ILMN_1652490	MANSC1	0.0277826	1.1394
ILMN_1670899	FBN2	0.027177	1.13929
ILMN_1773849	ATP6V0C	0.0437074	1.13871
ILMN_1802843	PRCC	0.0278283	1.1385
ILMN_1758918	BRD2	0.0413806	1.13687
ILMN_1676611	PHPT1	0.028598	1.13673
ILMN_1881005		0.00939863	1.13611
ILMN_1809013	MYL6	0.0173083	1.13521
ILMN_1730791	LOC646783	0.0317657	1.13368
ILMN_1654966	SCARA3	0.0474826	1.13287
ILMN_1769116	LCN12	0.0195431	1.13281
ILMN_1781155	LYN	0.0426897	1.13105
ILMN_1765825	WDR23	0.0485845	1.12747
ILMN_1699711	DEDD	0.00823174	1.12386
ILMN_1762327	DHRS12	0.0386187	1.12297
ILMN_1698668	NR1D2	0.0180898	1.1224
ILMN_1821531		0.0388968	1.12229
ILMN_1745130	RBM9	0.0401558	1.11821
ILMN_1670093	HIST2H2BF	0.0263381	1.11765
ILMN_1811648	DCAKD	0.0423361	1.11749
ILMN_1747598	PPP1R11	0.0240317	1.11569
ILMN_1656826	SH3RF1	0.0481009	1.11503
ILMN_1736796	RB1CC1	0.0207371	1.11484
ILMN_1709894	CLPX	0.0471868	1.11327
ILMN_1740707	LOC646123	0.0108963	1.11325
ILMN_1765860	DOCK11	0.0490887	1.1102
ILMN_1809040	LDLRAP1	0.00323637	1.10687
ILMN_1662556	GALNT10	0.0271613	1.10525
ILMN_1727183	ZNF763	0.0224657	1.10466
ILMN_1745368	TMEM50A	0.0338526	1.10404
ILMN_1758626	IDS	0.0307531	1.10313
ILMN_1718960	SERPINB8	0.0376465	1.10307
ILMN_1655740	SNAI2	0.0435539	1.10119
ILMN_1765032	LOC440993	0.023517	1.1002
ILMN_1802631	AGA	0.0216934	1.09993
ILMN_1753547	STAT5A	0.0252976	1.09916
ILMN_1873412	ADAMTS14	0.0187196	1.09895
ILMN_1671809	DUSP22	0.0279943	1.09808
ILMN_1660858	RIN1	0.0352629	1.09366
ILMN_1758323	ACPP	0.0176514	1.09125
ILMN_1790228	FURIN	0.0430441	1.09038
ILMN_1684210	NPAL3	0.0190124	1.09025
ILMN_1709740	TXNDC16	0.0437394	1.08634
ILMN_1800420	RNF214	0.00707668	1.08569
ILMN_1725043	ADAL	0.0408381	1.06584
ILMN_1774589	IQCC	0.0460536	-1.07486
ILMN_1762080	JMY	0.0306749	-1.07973
ILMN_1909191		0.01551	-1.08538
ILMN_1698304	LOC642969	0.0316903	-1.0894
ILMN_1796165	GLRX5	0.0436234	-1.09032
ILMN_1749662	GPX1	0.0476861	-1.09686
ILMN_1795181	DDX60	0.0487546	-1.0976
ILMN_1759743	SLC38A10	0.0491375	-1.10354
ILMN_1838313		0.0473933	-1.10863
ILMN_1696294	SNX6	0.0308021	-1.1102
ILMN_1808501	SH3KBP1	0.0246595	-1.1109
ILMN_1657204	SAE1	0.0192065	-1.1129
ILMN_1736828	CHST10	0.0455595	-1.11375
ILMN_1763208	ZNF10	0.0114212	-1.11409
ILMN_1788022	CDKAL1	0.0251671	-1.11457
ILMN_1706028	VCX2	0.00578441	-1.11506
ILMN_1898682		0.0423809	-1.11703
ILMN_1667657	TPP2	0.0423552	-1.11756
ILMN_1679438	MLF1IP	0.0384995	-1.11796
ILMN_1712204	LOC645466	0.0226867	-1.12042
ILMN_1672128	ATF4	0.0437847	-1.12194
ILMN_1765409	STAM	0.0135064	-1.1225
ILMN_1707084	UBE2D4	0.0189929	-1.12321
ILMN_1800096	MPST	0.00563919	-1.12368
ILMN_1861376		0.0424012	-1.1239
ILMN_1721128	TOMM34	0.0397523	-1.12469
ILMN_1790577	SLC35F2	0.00834332	-1.12572
ILMN_1803376	AEBP2	0.0284628	-1.12642
ILMN_1762802	CNIH2	0.0316903	-1.12843
ILMN_1697652	PLEKHB2	0.0149436	-1.12847
ILMN_1766405	GOLM1	0.00267183	-1.12864
ILMN_1908824		0.0294118	-1.12915
ILMN_1758214	RARS2	0.0482517	-1.1296
ILMN_1787808	CEP63	0.0219063	-1.12985
ILMN_1772658	KIAA0947	0.0383866	-1.13035
ILMN_1763628	LOC653188	0.0443364	-1.13139
ILMN_1685112	TACO1	0.0357215	-1.13143
ILMN_1786034	GPRC5B	0.0418985	-1.13153
ILMN_1718354	INTS7	0.018465	-1.13179
ILMN_1719392	FH	0.0138219	-1.13322
ILMN_1703408	FZD3	0.0430003	-1.13378
ILMN_1810832	ZNF343	0.0490856	-1.13399
ILMN_1701308	COL1A1	0.0410952	-1.13422
ILMN_1673936	KHSRP	0.042145	-1.13555
ILMN_1769705	LOC440093	0.0116538	-1.13599
ILMN_1708537	RBPJ	0.0181208	-1.13701
ILMN_1731418	SP110	0.0294118	-1.13717
ILMN_1691430	GSTCD	0.0391092	-1.13753
ILMN_1757627	ZMYND19	0.0338762	-1.13778
ILMN_1807710	HINT1	0.0117241	-1.13821
ILMN_1673899	FAM57A	0.0233928	-1.13855
ILMN_1781472	CDC42BPA	0.0244165	-1.14021
ILMN_1786281	ZSCAN12	0.0173083	-1.14041
ILMN_1652819	OPA3	0.0496478	-1.14073
ILMN_1765401	RRN3	0.0157068	-1.14122
ILMN_1784977	DOHH	0.00807931	-1.14131
ILMN_1729775	OPA1	0.0238715	-1.14141
ILMN_1711988	KCNK12	0.0281873	-1.1421
ILMN_1761411	C10orf119	0.0483445	-1.14221
ILMN_1791949	PGBD1	0.0442499	-1.14239
ILMN_1719219	ZNF616	0.00725942	-1.1426
ILMN_1912185		0.0446207	-1.14278
ILMN_1683017	LOC646853	0.0328611	-1.14283
ILMN_1784328	SNORD25	0.0278065	-1.14367
ILMN_1702541	CCDC55	0.03942	-1.14376
ILMN_1713058	PSTPIP2	0.000357983	-1.14522
ILMN_1809850	RCN3	0.0154335	-1.14524
ILMN_1812934	DIDO1	0.0256442	-1.14538
ILMN_1757742	ZRANB1	0.0143278	-1.14551
ILMN_1688464	MAP6D1	0.0369167	-1.14553
ILMN_1681741	C1orf31	0.0187943	-1.14578
ILMN_1659953	2003-09-01	0.0330676	-1.14608
ILMN_1704084	CMAH	0.0338258	-1.1465
ILMN_1804384	ASMTL	0.00358279	-1.14689
ILMN_1679371	LOC642255	0.0248044	-1.14767
ILMN_1736135	TYW1	0.045372	-1.14803
ILMN_1744628	FDX1L	0.0233358	-1.14833
ILMN_1658259	DRG1	0.0370235	-1.1488
ILMN_1769299	MTMR11	0.0269534	-1.14909
ILMN_1735548	HIVEP1	0.0448496	-1.1495
ILMN_1763834	APLP1	0.0189023	-1.14971
ILMN_1770399	C10orf107	0.0424526	-1.15071
ILMN_1700487	TOP3A	0.0460849	-1.15094
ILMN_1793410	SNTB1	0.0223315	-1.15136
ILMN_1845037		0.0179634	-1.15214
ILMN_1903406	LOC645634	0.012537	-1.15258
ILMN_1691809	PSMA1	0.0299746	-1.15259
ILMN_1771149	MRPL19	0.010158	-1.15273
ILMN_1789535	DHDDS	0.0126626	-1.1532
ILMN_1745271	EXOSC4	0.0430396	-1.15377
ILMN_1671288	ODF2	0.0234123	-1.15463
ILMN_1747775	STX2	0.0479451	-1.15472
ILMN_1747192	RNF125	0.0253194	-1.15497
ILMN_1654250	MRPL21	0.0352513	-1.15534
ILMN_1715546	LOC441191	0.0451453	-1.1557
ILMN_1713156	MSL3L1	0.0328422	-1.1561
ILMN_1678140	TTC4	0.0317657	-1.15624
ILMN_1794522	EIF5A	0.0098363	-1.15655
ILMN_1678423	SPA17	0.0201254	-1.15691
ILMN_1743049	PWP1	0.0147985	-1.15742
ILMN_1660544	ARRDC4	0.0457445	-1.15785
ILMN_1768930	U2AF2	0.0343971	-1.15798
ILMN_1776216	MMGT1	0.0127563	-1.15831
ILMN_1684346	TNFAIP8L1	0.0316903	-1.15846
ILMN_1715540	TRAIP	0.0113807	-1.15868
ILMN_1720844	SSX2IP	0.04869	-1.15875
ILMN_1770732	COPS3	0.0496806	-1.15883
ILMN_1657790	SFRS11	0.0219063	-1.15892
ILMN_1725984	LOC728689	0.0382071	-1.15946
ILMN_1680781	C14orf135	0.0231929	-1.16092
ILMN_1657754	RPAP2	0.00637646	-1.16098
ILMN_1719694	LOC729446	0.0168573	-1.16102
ILMN_1732772	PPME1	0.00288624	-1.16154
ILMN_1713505	NPC1	0.0315925	-1.16203
ILMN_1748770	CKAP5	0.00834576	-1.16267
ILMN_1761247	PIR	0.0319884	-1.16316
ILMN_1701244	ITFG2	0.0153195	-1.16387
ILMN_1792990	ZNF202	0.0312016	-1.16451
ILMN_1798014	EIF2S2	0.0482908	-1.16549
ILMN_1762674	NUP43	0.0465226	-1.16559
ILMN_1674698	AARS2	0.0270996	-1.16638
ILMN_1737988	PRNP	0.0110732	-1.16708
ILMN_1751075	SETD4	0.0264826	-1.16718
ILMN_1734766	C6orf182	0.04114	-1.16797
ILMN_1746579	UBE2O	0.0237748	-1.16822
ILMN_1671905	C10orf78	0.0331657	-1.16931
ILMN_1734742	ARHGDIA	0.0441147	-1.16964
ILMN_1803856	DKFZP586I1420	0.0042625	-1.16989
ILMN_1761844	ZCCHC17	0.00126432	-1.16997
ILMN_1689172	BOAT	0.0149436	-1.17099
ILMN_1705737	IMPDH2	0.0373774	-1.172
ILMN_1651690	PGBD4	0.00978239	-1.1724
ILMN_1677273	TH	0.0399105	-1.1728
ILMN_1768020	HAUS8	0.0241097	-1.17324
ILMN_1680010	KIAA0753	0.0270824	-1.17417
ILMN_1682694	LOC203547	0.042319	-1.17467
ILMN_1687864	POP5	0.00689513	-1.17614
ILMN_1669669	KCMF1	0.0100592	-1.17645
ILMN_1704637	C4orf23	0.0234724	-1.17691
ILMN_1744316	TATDN3	0.0237748	-1.17761
ILMN_1816244		0.0412431	-1.17764
ILMN_1810608	PNPT1	0.0013312	-1.17838
ILMN_1783120	SLMAP	0.0259693	-1.17874
ILMN_1802906	LOC646900	0.0432675	-1.17902
ILMN_1713679	MREG	0.0410157	-1.17905
ILMN_1715931	ISCA1	0.00979057	-1.17909
ILMN_1679185	LEF1	0.0351441	-1.17933
ILMN_1686454	TIFA	0.0240585	-1.17957
ILMN_1703688	RASA2	0.0383971	-1.18032
ILMN_1778161	DNAJC25	0.0421277	-1.18137
ILMN_1813344	C20orf7	0.0146332	-1.1814
ILMN_1697665	LOC653972	0.0405889	-1.1815
ILMN_1808765	ZNF25	0.0255429	-1.18161
ILMN_1784031	TIMM44	0.0314036	-1.18241
ILMN_1694603	SMARCC1	0.0320534	-1.18374
ILMN_1815733	EIF5	0.033728	-1.1838
ILMN_1706344	ABHD6	0.00602861	-1.18383
ILMN_1677305	PVR	0.0189606	-1.1839
ILMN_1797813	SUZ12	0.0342142	-1.18427
ILMN_1712517	ZNF696	0.0288486	-1.18438
ILMN_1673773	GALNTL4	0.0307531	-1.18486
ILMN_1675501	SENP5	0.0391829	-1.1855
ILMN_1815610	SYT12	0.0189606	-1.18614
ILMN_1721623	APOO	0.0423809	-1.18651
ILMN_1659874	SFRS15	0.0344371	-1.18658
ILMN_1671250	CLIC4	0.0212943	-1.18668
ILMN_1669555	FAM48A	0.0351548	-1.18671
ILMN_1700811	UBFD1	0.0154011	-1.18717
ILMN_1768117	RBM25	0.0416978	-1.18723
ILMN_1666471	UQCRQ	0.0448672	-1.18723
ILMN_1677018	HOXA4	0.0327457	-1.1874
ILMN_1809285	DCP1A	0.00709623	-1.18744
ILMN_1754045	FANCL	0.0276578	-1.18798
ILMN_1798712	USP4	0.0192987	-1.18815
ILMN_1731412	UBTD2	0.0211652	-1.18855
ILMN_1723021	ICMT	0.0490608	-1.18938
ILMN_1713832	SNORD15B	0.0402743	-1.1894
ILMN_1784553	SDC2	0.0448672	-1.19009
ILMN_1759008	ZNF689	0.0416978	-1.19028
ILMN_1789176	PSMB1	0.0338762	-1.19048
ILMN_1683059	SIRT5	0.0357528	-1.19064
ILMN_1768273	POP1	0.0311959	-1.1908
ILMN_1671114	LOC388565	0.0120158	-1.19081
ILMN_1697916	GYLTL1B	0.00519088	-1.19155
ILMN_1655557	INTS6	0.0352629	-1.19168
ILMN_1736995	C12orf66	0.0250996	-1.19239
ILMN_1790162	LOC441155	0.00954893	-1.19247
ILMN_1678745	NUDCD1	0.044899	-1.19378
ILMN_1699703	ARCN1	0.000513281	-1.19415
ILMN_1667564	ALDH3A2	0.0222826	-1.19468
ILMN_1792076	TRERF1	0.0188506	-1.19475
ILMN_1828197		0.0157156	-1.1948
ILMN_1728047	AKR1A1	0.0097701	-1.19493
ILMN_1755677	FAM158A	0.0400609	-1.19573
ILMN_1737991	LOC650298	0.0237357	-1.19593
ILMN_1693287	POMP	0.0322065	-1.19616
ILMN_1771019	MTMR4	0.0153287	-1.19667
ILMN_1794157	CATSPER2P1	0.0345716	-1.19692
ILMN_1657796	STMN1	0.0291342	-1.19709
ILMN_1748908	PROSC	0.0360812	-1.19734
ILMN_1661500	B4GALT4	0.0423809	-1.19739
ILMN_1811551	DERA	0.0402976	-1.19774
ILMN_1755134	HSPA4	0.0172572	-1.19776
ILMN_1676864	DDX31	0.0260511	-1.19785
ILMN_1664371	HIATL1	0.0116063	-1.19801
ILMN_1786347	TNPO1	0.0435539	-1.19823
ILMN_1669722	LRRC61	0.0244182	-1.19851
ILMN_1748926	TMEM209	0.0412018	-1.19855
ILMN_1734198	RNGTT	0.0146217	-1.19881
ILMN_1760649	PCK2	0.0226867	-1.19884
ILMN_1708077	DAXX	0.0257205	-1.19905
ILMN_1680130	DYM	0.0325629	-1.19913
ILMN_1657949	RHEB	0.0432031	-1.19935
ILMN_1736353	PSMC1	0.00979057	-1.20007
ILMN_1697670	SRRM1	0.0189847	-1.20159
ILMN_1787657	CLDN12	0.0189142	-1.20177
ILMN_1708798	EAF2	0.0299288	-1.20212
ILMN_1720542	POLR2I	0.0301611	-1.20313
ILMN_1681898	LOC647784	0.0456685	-1.20387
ILMN_1657682	GFM1	0.0141118	-1.20401
ILMN_1740385	CEP164	0.0175651	-1.20406
ILMN_1797209	TSGA14	0.0437074	-1.20407
ILMN_1697742	C3orf38	0.0220066	-1.20411
ILMN_1677237	CHCHD9	0.0270795	-1.20428
ILMN_1788421	KCNK15	0.0443729	-1.20453
ILMN_1805742	DHX37	0.00449304	-1.20462
ILMN_1705679	SAFB2	0.0231947	-1.20475
ILMN_1789059	GDAP2	0.0263655	-1.20507
ILMN_1724907	NUDT3	0.0251525	-1.20535
ILMN_1698715	NHLRC2	0.00862394	-1.20656
ILMN_1795719	RPA1	0.0225812	-1.20705
ILMN_1760143	ADRM1	0.0327457	-1.20731
ILMN_1809139	AHCTF1	0.00671543	-1.20734
ILMN_1691949	LOC728554	0.0250485	-1.20742
ILMN_1676745	ZNF142	0.0475069	-1.20742
ILMN_1679891	NAF1	0.0220066	-1.20779
ILMN_1767747	HDAC2	0.0202476	-1.20808
ILMN_1745593	STMN1	0.0176001	-1.20822
ILMN_1689704	TMEM5	0.00915895	-1.20846
ILMN_1741406	HOOK1	0.0277114	-1.20852
ILMN_1700628	DDX24	0.0497155	-1.20853
ILMN_1771805	ELK4	0.0469868	-1.2094
ILMN_1687403	MRPL40	0.0111726	-1.20958
ILMN_1800573	RPS21	0.0230605	-1.21003
ILMN_1724658	BNIP3	0.0389818	-1.2102
ILMN_1666757	SDHALP1	0.00556829	-1.21028
ILMN_1812552	PHCA	0.0315925	-1.21093
ILMN_1708105	EZH2	0.00681765	-1.21151
ILMN_1759987	HS6ST1	0.00333758	-1.2117
ILMN_1771264	ELL3	0.0218835	-1.21259
ILMN_1755882	C13orf7	0.0353617	-1.21294
ILMN_1724826	DNM1L	0.0314132	-1.21347
ILMN_1808500	CEP68	0.0219063	-1.21407
ILMN_1781983	AP1B1	0.0474621	-1.21421
ILMN_1804207	MRPL4	0.030019	-1.21434
ILMN_1666502	SOBP	0.0456104	-1.21437
ILMN_1776147	C21orf59	0.0120593	-1.21442
ILMN_1771738	ARL5A	0.0207523	-1.21475
ILMN_1765019	SACM1L	0.00170455	-1.21478
ILMN_1746137	ST7	0.0338012	-1.21481
ILMN_1722673	PCDHB4	0.0196016	-1.21485
ILMN_1737635	RAD1	0.0495685	-1.21535
ILMN_1700232	FBXO30	0.0125841	-1.21536
ILMN_1654421	MPHOSPH9	0.0191626	-1.21637
ILMN_1726306	HMBS	0.0338284	-1.21692
ILMN_1764314	FGD1	0.0341905	-1.21711
ILMN_1681737	TMSB15A	0.0352957	-1.21728
ILMN_1653822	NEK2	0.0470227	-1.21789
ILMN_1712019	ANKRD17	0.0315925	-1.21796
ILMN_1707783	CCDC72	0.0316828	-1.2188
ILMN_1662738	ACSM3	0.014734	-1.21882
ILMN_1784037	ZBTB40	0.0351867	-1.21906
ILMN_1785914	CDC6	0.0312404	-1.21921
ILMN_1705093	ORC5L	0.0451239	-1.22048
ILMN_1805973	GPR19	0.0491206	-1.22065
ILMN_1711023	CDK5RAP1	0.0263655	-1.22122
ILMN_1761031	PTPDC1	0.0326267	-1.22168
ILMN_1761101	CCDC112	0.0314072	-1.2217
ILMN_1685781	C14orf142	0.0361031	-1.22185
ILMN_1685057	SLC22A4	0.0327001	-1.22206
ILMN_1755664	RPS26	0.0146143	-1.2224
ILMN_1726842	TYW3	0.0320536	-1.2227
ILMN_1742569	PAPD1	0.0410952	-1.22277
ILMN_1696347	CTSC	0.0481647	-1.22302
ILMN_1699254	PLEKHH1	0.0175651	-1.22338
ILMN_1681543	RHBDD1	0.0126817	-1.22344
ILMN_1741632	RAB3IL1	0.0318849	-1.22432
ILMN_1662686	USPL1	0.00899059	-1.22451
ILMN_1652631	GLIPR2	0.0183645	-1.22458
ILMN_1770811	PELO	0.0145474	-1.22465
ILMN_1696670	LOC92497	0.0288643	-1.22487
ILMN_1690965	DHX9	0.0217531	-1.22488
ILMN_1651872	UBIAD1	0.017148	-1.22489
ILMN_1806123	MRPL23	0.031806	-1.2249
ILMN_1739429	HS6ST2	0.0262062	-1.22525
ILMN_1717313	NFKBIE	0.0312016	-1.2259
ILMN_1692733	NRARP	0.0435047	-1.22607
ILMN_1803691	ARTN	0.0315925	-1.22624
ILMN_1777499	LOC731007	0.0173474	-1.2266
ILMN_1708337	NOXO1	0.0258855	-1.22713
ILMN_1738819	EFTUD2	0.00911227	-1.22722
ILMN_1767481	XRCC6BP1	0.0382709	-1.22726
ILMN_1808163	C11orf24	0.0172572	-1.22738
ILMN_1671933	CLCC1	0.0311519	-1.22793
ILMN_1696311	IMPAD1	0.0202299	-1.22796
ILMN_1673966	POLR3F	0.0363297	-1.22827
ILMN_1697585	ACTR6	0.00274543	-1.22838
ILMN_1724990	C3orf75	0.023799	-1.22845
ILMN_1671766	F12	0.0351426	-1.22854
ILMN_1726783	RNASEH1	0.0446207	-1.22883
ILMN_1798728	C19orf2	0.0357668	-1.22886
ILMN_1654385	ASB13	0.00448333	-1.22908
ILMN_1767365	PAK1	0.0296187	-1.22935
ILMN_1707748	PIM3	0.0266664	-1.2295
ILMN_1806757	MYBBP1A	0.00875479	-1.22988
ILMN_1729179	SPATA5L1	0.00379768	-1.22989
ILMN_1662147	MANEAL	0.0187655	-1.22997
ILMN_1689932	WDR85	0.0309551	-1.23017
ILMN_1770048	DPH5	0.0129465	-1.23027
ILMN_1769449	MBLAC2	0.0140696	-1.23031
ILMN_1790625	CBX3	0.00674585	-1.23068
ILMN_1680419	ASB7	0.0167443	-1.23121
ILMN_1719906	HADH	0.0419421	-1.23175
ILMN_1796407	SS18L2	0.0262028	-1.23191
ILMN_1776347	TCP1	0.0371758	-1.2321
ILMN_1788810	C12orf30	0.0431193	-1.23216
ILMN_1655710	LOC642989	0.0442264	-1.23248
ILMN_1744147	CEBPZ	0.0448672	-1.23268
ILMN_1777156	GTPBP3	0.0118955	-1.23273
ILMN_1677736	TMEM104	0.0102491	-1.23312
ILMN_1771039	GTSE1	0.0200556	-1.23323
ILMN_1722533	KATNAL1	0.0231112	-1.23329
ILMN_1704056	RPPH1	0.0247143	-1.23356
ILMN_1814526	ADD3	0.0416072	-1.23356
ILMN_1808779	CSTF3	0.0241097	-1.23363
ILMN_1721316	TNFRSF10A	0.0215412	-1.23437
ILMN_1652331	KCTD5	0.0298086	-1.23437
ILMN_1718672	NHP2	0.025223	-1.23473
ILMN_1797728	HMGCS1	0.0104858	-1.23497
ILMN_1761083	HNRNPA3	0.022781	-1.23525
ILMN_1715863	MLKL	0.0122557	-1.23526
ILMN_1764090	AK3L1	0.0489073	-1.23535
ILMN_1741957	RABEPK	0.0318849	-1.23561
ILMN_1743219	CA11	0.0232384	-1.23594
ILMN_1798354	PAPOLA	0.00939786	-1.23608
ILMN_1723235	DUS3L	0.0341155	-1.23629
ILMN_1673548	HSPC159	0.00237158	-1.23656
ILMN_1773797	LOC652615	0.0234123	-1.23669
ILMN_1654322	ATP1B3	0.0412298	-1.23689
ILMN_1770515	UBE2V2	0.0356229	-1.23723
ILMN_1790309	PINX1	0.0356392	-1.23738
ILMN_1700337	TROAP	0.0465191	-1.23748
ILMN_1657395	HMGCR	0.0387221	-1.23759
ILMN_1676709	SDK2	0.0146332	-1.23792
ILMN_1793474	INSIG1	0.0413293	-1.23802
ILMN_1707448	CRKRS	0.00732097	-1.23804
ILMN_1716400	FOXM1	0.0148329	-1.23807
ILMN_1700168	LARS2	0.0338258	-1.23813
ILMN_1723177	ANAPC5	0.00430193	-1.23839
ILMN_1832208		0.0238103	-1.23915
ILMN_1815043	MRPS2	0.0425008	-1.23915
ILMN_1751773	POLD3	0.0416978	-1.23923
ILMN_1669550	MAD2L2	0.0339242	-1.2393
ILMN_1763989	SEC63	0.0104685	-1.23932
ILMN_1776674	SAC3D1	0.0174355	-1.23995
ILMN_1737685	CRLS1	0.0349075	-1.24008
ILMN_1667460	SULF2	0.00724077	-1.24012
ILMN_1655051	FAM86B1	0.0230846	-1.24043
ILMN_1672728	KCTD5	0.0231929	-1.24046
ILMN_1703593	BAIAP2L1	0.012401	-1.24065
ILMN_1686319	USP37	0.00908459	-1.24069
ILMN_1762606	AQP11	0.0139455	-1.24107
ILMN_1696622	SLC38A6	0.0100219	-1.24127
ILMN_1765796	ENO2	0.0432099	-1.24135
ILMN_1905548		0.0219757	-1.24163
ILMN_1725471	GK	0.00220862	-1.24228
ILMN_1709851	TCEA1	0.0479118	-1.24259
ILMN_1664993	GIYD2	0.0374407	-1.24263
ILMN_1793302	WDR4	0.0155154	-1.24321
ILMN_1748481	TMEM199	0.0315986	-1.24338
ILMN_1691181	TMX1	0.0138586	-1.24412
ILMN_1758629	DONSON	0.015924	-1.2442
ILMN_1761721	VPS35	0.0215412	-1.2443
ILMN_1732143	FLJ42957	0.0104858	-1.24431
ILMN_1688526	ARL5A	0.034365	-1.24432
ILMN_1771411	ALG6	0.0368383	-1.24435
ILMN_1734702	MANEA	0.0250996	-1.2445
ILMN_1665737	UFD1L	0.0122994	-1.24488
ILMN_1712432	PSMD2	0.00397771	-1.24496
ILMN_1678934	POLR1E	0.0257486	-1.24516
ILMN_1760990	SH3GL3	0.0331657	-1.24527
ILMN_1668861	LOC732165	0.0369832	-1.24536
ILMN_1673376	TBCD	0.0067634	-1.24561
ILMN_1757317	LARS	0.00750171	-1.24567
ILMN_1806502	ZNF165	0.00461039	-1.24639
ILMN_1664931	GTF2E2	0.0150898	-1.24647
ILMN_1847494		0.0239947	-1.24659
ILMN_1699253	LOC729317	0.0496478	-1.24685
ILMN_1804090	SLC25A10	0.0435539	-1.24754
ILMN_1669831	C6orf192	0.0139173	-1.24811
ILMN_1741398	KIAA0406	0.0273758	-1.24815
ILMN_1668498	CWF19L2	0.0270824	-1.24831
ILMN_1719518	ARF4	0.0168573	-1.24857
ILMN_1747504	AHCTF1	0.00700864	-1.24911
ILMN_1693985	JPH1	0.0437997	-1.24957
ILMN_1715969	SLC25A37	0.0055779	-1.24971
ILMN_1780283	C20orf201	0.0481009	-1.24972
ILMN_1702837	PSMD1	0.0303395	-1.24991
ILMN_1712257	PPP2R3B	0.0127975	-1.25
ILMN_1716895	RPA3	0.038149	-1.25007
ILMN_1656452	C16orf59	0.00157404	-1.25008
ILMN_1688753	PTDSS1	0.0129776	-1.25014
ILMN_1804137	ATP11C	0.0121825	-1.25027
ILMN_1757026	MANEA	0.0094923	-1.25049
ILMN_1886515		0.0196451	-1.25065
ILMN_1783728	TBRG4	0.0143257	-1.25068
ILMN_1710571	PAPD5	0.0170112	-1.25073
ILMN_1710001	RPL41	0.00182211	-1.25086
ILMN_1771903	NUP37	0.0175337	-1.25161
ILMN_1801767	ABHD3	0.0240312	-1.25199
ILMN_1664216	NKIRAS1	0.0183316	-1.2521
ILMN_1656145	GOT1	0.0424184	-1.25244
ILMN_1754860	MRPS12	0.0387221	-1.25252
ILMN_1763540	PSME4	0.0237886	-1.25313
ILMN_1779190	ALKBH8	0.0482346	-1.25325
ILMN_1678086	CCDC74A	0.0430682	-1.25336
ILMN_1701966	LOC286467	0.00779548	-1.2537
ILMN_1735453	FAM98A	0.0165101	-1.25391
ILMN_1666258	AMFR	0.0157068	-1.25489
ILMN_1725366	SLC27A5	0.01199	-1.25494
ILMN_1763828	MTF1	0.0440029	-1.2557
ILMN_1739045	LOC647009	0.00323637	-1.25586
ILMN_1652753	PAAF1	0.00907745	-1.2559
ILMN_1800912	ZFP106	0.0154987	-1.25595
ILMN_1814589	LOC728037	0.0138745	-1.25622
ILMN_1733164	FBXO11	0.0480369	-1.25659
ILMN_1696962	PDZD8	0.0449117	-1.25664
ILMN_1742238	SET	0.0382651	-1.25674
ILMN_1771620	SNRPB2	0.0223411	-1.25704
ILMN_1794875	AGPAT9	0.00971955	-1.25745
ILMN_1730611	RTN4	0.0272524	-1.25751
ILMN_1695576	MRPL24	0.0045289	-1.25753
ILMN_1730928	CDK5R1	0.0254834	-1.25785
ILMN_1782788	CSDA	0.0133315	-1.25828
ILMN_1782377	LOC440354	0.0463054	-1.25852
ILMN_1673543	PGM2	0.0353617	-1.25883
ILMN_1786469	FBXO22	0.0368877	-1.25899
ILMN_1773751	HRAS	0.0138828	-1.25906
ILMN_1656521	CGI-96	0.0263655	-1.25941
ILMN_1799367	TXNDC14	0.00522837	-1.25996
ILMN_1761463	EFHD2	0.00797924	-1.2604
ILMN_1692539	SH3BP1	0.0348409	-1.26062
ILMN_1679912	DPH3	0.00754452	-1.26072
ILMN_1768958	RASGRP1	0.00645251	-1.26073
ILMN_1799299	PRPF38B	0.0492235	-1.26106
ILMN_1669635	NUP85	0.036204	-1.26127
ILMN_1706825	PKN2	0.0486014	-1.26144
ILMN_1746686	POLR1C	0.000367177	-1.26167
ILMN_1745112	FAM102A	0.0424542	-1.26189
ILMN_1746031	RIMS4	0.0112615	-1.26195
ILMN_1656196	E2F6	0.0312016	-1.2624
ILMN_1660698	GTPBP8	0.0129465	-1.26247
ILMN_1692486	ZNRD1	0.04672	-1.26297
ILMN_1747241	IWS1	0.0202104	-1.2633
ILMN_1746375	CSNK2A1P	0.0151431	-1.26395
ILMN_1773964	H1FX	0.0205661	-1.26449
[truncated: 1,047 more rows]

## Sheet: F vs ED (IN VITRO PROBES=1736)
Illumina Probe ID	Gene Symbol	Corrected p-value (48H Fulvestrant vs. 48H DCC)	Fold-Change (48H Fulvestrant vs. 48H DCC)
ILMN_1797776	PRSS23	0.000206796	4.04781
ILMN_1734276	PMEPA1	4.02327e-05	3.78279
ILMN_1780170	APOD	0.00021872	3.47739
ILMN_1655637	UPK1A	0.000469464	3.25682
ILMN_1706505	COL5A1	0.000918043	3.17132
ILMN_1707695	IFIT1	0.00259308	3.07107
ILMN_1668863	LYPD1	0.000352414	2.96686
ILMN_1812461	WISP2	0.00021872	2.84613
ILMN_1695354	BMF	0.000103283	2.83131
ILMN_1655595	SERPINE2	0.000103283	2.79981
ILMN_1794863	CAMK2N1	4.20017e-05	2.7822
ILMN_1791726	TUBB3	0.000537955	2.6973
ILMN_1714170	SPSB1	0.00134247	2.60844
ILMN_1784602	CDKN1A	0.000935811	2.56359
ILMN_1651958	MGP	0.000327816	2.55376
ILMN_1756417	ANKRD37	0.000108141	2.44752
ILMN_1705814	KRT80	0.00329149	2.43199
ILMN_1709067	SAMD11	0.00191098	2.4228
ILMN_1778668	TAGLN	0.00377563	2.38695
ILMN_1740276	CLDN9	0.00215185	2.37487
ILMN_1708934	ADM	0.000552483	2.37387
ILMN_1745471	IRF9	0.0137849	2.35641
ILMN_1674063	OAS2	0.00193679	2.30968
ILMN_1730487	CALD1	5.52366e-05	2.28987
ILMN_1730670	FSTL3	0.00298467	2.2508
ILMN_1796423	CLIC3	0.0031556	2.22936
ILMN_1673409	MGC16121	0.00243777	2.21975
ILMN_1663080	LFNG	0.000172505	2.20885
ILMN_1652409	SPATA7	0.00152978	2.15953
ILMN_1682738	SMAD3	0.00141569	2.14788
ILMN_1787509	PRIC285	0.00548767	2.14292
ILMN_1762899	EGR1	0.00164814	2.14002
ILMN_1801105	PRKCD	0.00157226	2.13781
ILMN_1801246	IFITM1	0.000523785	2.10146
ILMN_1687384	IFI6	0.00517732	2.09189
ILMN_1723198	CDKN2B	0.0173787	2.05118
ILMN_1666845	KRT17	0.00578905	2.05031
ILMN_1768958	RASGRP1	0.000320086	2.03029
ILMN_1694840	MATN2	0.00259308	2.03029
ILMN_1739428	IFIT2	0.000886242	2.01828
ILMN_1659215	CYP4B1	0.0039811	2.00979
ILMN_1738552	SLC1A3	0.000317602	1.97047
ILMN_1781580	BRI3	0.000886242	1.96785
ILMN_1795298	GPER	0.0110549	1.96618
ILMN_1661599	DDIT4	0.00228287	1.95239
ILMN_1705231	SLCO2A1	0.000984984	1.93418
ILMN_1713952	C1orf106	0.00124058	1.92776
ILMN_1806733	COL18A1	0.00496704	1.91373
ILMN_1735014	KLF6	0.000730648	1.91152
ILMN_1758938	SLC31A2	0.00194003	1.90891
ILMN_1755721	FAM63A	0.00243777	1.89109
ILMN_1705144	ULK1	0.00143167	1.88826
ILMN_1759676	HOXC13	0.00493919	1.875
ILMN_1666819	PHLDB1	0.00199826	1.87457
ILMN_1752249	FAM38A	0.00825287	1.86342
ILMN_1691364	STAT1	0.0191529	1.86305
ILMN_1656369	C8orf4	0.00067154	1.86221
ILMN_1658835	CAV2	0.000479521	1.85208
ILMN_1779015	ZNF467	0.00745007	1.84735
ILMN_1804461	MYH14	0.00491765	1.84052
ILMN_1805543	ADAMTS9	0.00308056	1.8379
ILMN_1732296	ID3	0.00491765	1.832
ILMN_1670899	FBN2	0.000336594	1.819
ILMN_1803408	KRT18	0.0125639	1.81682
ILMN_1673352	IFITM2	0.00339622	1.81674
ILMN_1739238	L1CAM	0.00654782	1.81658
ILMN_1680132	CADM1	0.00194982	1.81302
ILMN_1718558	PARP12	0.00113576	1.79929
ILMN_1745256	CXXC5	0.000192089	1.79646
ILMN_1705116	C6orf85	0.00339622	1.79594
ILMN_1687583	CAV1	0.00569284	1.78615
ILMN_1679093	ZNF581	0.00221923	1.78122
ILMN_1667295	VASN	0.00320499	1.77193
ILMN_1726460	RPL14	0.0369509	1.76842
ILMN_1775743	BTG1	0.0335027	1.76781
ILMN_1685722	EIF4A2	0.00118099	1.76453
ILMN_1675448	ZFP36L1	0.00417569	1.76258
ILMN_1717793	C19orf33	0.00349894	1.75981
ILMN_1790014	METRNL	0.0239969	1.75841
ILMN_1696187	PYGL	0.00415453	1.7579
ILMN_1651799	SLC38A2	0.00137982	1.75764
ILMN_1652082	ELF4	0.00136256	1.75618
ILMN_1800425	SLC9A1	0.0154635	1.75168
ILMN_1810836	PDE5A	0.00428139	1.7485
ILMN_1735052	ULK1	0.0187263	1.74089
ILMN_1663092	CITED2	0.00417569	1.73499
ILMN_1731224	PARP9	0.00725529	1.73018
ILMN_1805750	IFITM3	0.0042469	1.72847
ILMN_1658989	MEX3B	0.00308056	1.72482
ILMN_1653711	FZD2	0.000336594	1.72408
ILMN_1693233	KIAA0513	0.000935811	1.72191
ILMN_1812526	TGFB2	0.0190631	1.7215
ILMN_1769520	UBE2L6	0.00164814	1.71644
ILMN_1769926	DBN1	0.00756638	1.71621
ILMN_1698100	ANXA2P1	0.000832312	1.7138
ILMN_1719986	PIK3IP1	0.00622279	1.70579
ILMN_1714433	MARCKSL1	0.00395106	1.70465
ILMN_1755727	KDM5B	0.00119703	1.69599
ILMN_1667626	EGLN3	0.00119703	1.69086
ILMN_1660199	ACAA2	0.00764315	1.68808
ILMN_1788778	2011-09-01	0.00556121	1.68677
ILMN_1770084	TACC1	0.00271216	1.68614
ILMN_1769546	RIN2	0.00300417	1.68603
ILMN_1682599	GPRC5A	0.00478024	1.68536
ILMN_1653934	LOC650517	0.000469464	1.68308
ILMN_1906187		0.00399605	1.68058
ILMN_1815745	SOX4	0.0059757	1.6792
ILMN_1690105	STAT1	0.0120707	1.67835
ILMN_1749915	C1orf63	0.031709	1.6746
ILMN_1737157	GRAMD1A	0.0170018	1.67191
ILMN_1736670	PPP1R3C	0.0118805	1.66648
ILMN_1811624	THADA	0.00561894	1.66416
ILMN_1681081	AGPAT2	0.00864231	1.65731
ILMN_1798181	IRF7	0.0200307	1.6572
ILMN_1789357	DLX3	0.00147549	1.65688
ILMN_1771538	PSCA	0.00151509	1.6557
ILMN_1699989	BNIPL	0.00642959	1.65539
ILMN_1672504	PDXK	0.0120757	1.65426
ILMN_1804117	FAM89B	0.00638704	1.65371
ILMN_1744949	RHOBTB3	0.00642224	1.65325
ILMN_1777061	ZSWIM6	0.00443187	1.65202
ILMN_1760412	SHISA2	0.0289882	1.64544
ILMN_1651429	SELM	0.000500313	1.64251
ILMN_1677814	ABCC3	0.00600615	1.63765
ILMN_1709307	GPSM1	0.00198651	1.63646
ILMN_1713744	C14orf132	0.0120757	1.63569
ILMN_1744635	IGDCC3	0.00199826	1.63032
ILMN_1759023	WFS1	0.00886177	1.63031
ILMN_1651498	GADD45G	0.0050133	1.62896
ILMN_1729288	C1QTNF6	0.00823619	1.62888
ILMN_1723141	OTUD1	0.0116978	1.6274
ILMN_1671565	RNASET2	0.00417569	1.62373
ILMN_1792455	TMEM158	0.0222879	1.6229
ILMN_1777325	STAT1	0.0100398	1.61953
ILMN_1672022	EPHA4	0.00578905	1.61754
ILMN_1669523	FOS	0.00310797	1.61748
ILMN_1698605	TMEM43	0.00720061	1.61715
ILMN_1806387	LOC340598	0.0130639	1.61419
ILMN_1653415	SPANXA2	0.0177917	1.6027
ILMN_1785071	SEPP1	0.0161576	1.60142
ILMN_1772189	ABCD1	0.00298467	1.60068
ILMN_1669878	GUSB	0.00484205	1.6001
ILMN_1752451	CTSH	0.00984744	1.5999
ILMN_1703891	TBC1D9	0.00221474	1.59153
ILMN_1670130	ARID3A	0.00493919	1.58959
ILMN_1658015	MBNL2	0.0180537	1.58919
ILMN_1811702	GRN	0.000255357	1.58676
ILMN_1796461	PRSS8	0.0243371	1.58676
ILMN_1723912	IFI44L	0.0189857	1.58569
ILMN_1740010	PCNX	0.00740248	1.58554
ILMN_1813561	SCIN	0.00417569	1.58478
ILMN_1802053	ZNF91	0.0198284	1.58388
ILMN_1672589	SEMA4B	0.00294719	1.58271
ILMN_1722872	MYH9	0.0420232	1.58062
ILMN_1701173	KCNK6	0.000164828	1.57678
ILMN_1711069	YPEL5	0.0268348	1.57228
ILMN_1773352	CCL5	0.00259308	1.5721
ILMN_1674811	OASL	0.00465801	1.57013
ILMN_1764709	MAFB	0.019202	1.56825
ILMN_1751561	CAMK1D	0.00186417	1.56563
ILMN_1672661	SP110	0.0109024	1.56497
ILMN_1683148	PRICKLE2	0.00971888	1.56254
ILMN_1840316		0.00426616	1.5609
ILMN_1675640	OAS1	0.0163578	1.55732
ILMN_1688775	METRNL	0.00106688	1.55579
ILMN_1657451	SRPK2	0.0019247	1.5555
ILMN_1788421	KCNK15	0.00441663	1.55434
ILMN_1755620	IER5L	0.0201374	1.55333
ILMN_1740466	FAM46A	0.00217089	1.5514
ILMN_1773154	NFKBIA	0.00325146	1.54944
ILMN_1713496	ST3GAL5	0.0173288	1.54865
ILMN_1665066	C4orf14	0.00309434	1.54779
ILMN_1803277	MVP	0.00308056	1.54701
ILMN_1689318	NUAK1	0.00831402	1.54634
ILMN_1699574	NRP1	0.00989621	1.54432
ILMN_1712231	SH3YL1	0.0118515	1.54341
ILMN_1897741		0.00561894	1.54277
ILMN_1796508	TOP1MT	0.0418192	1.53802
ILMN_1665435	GPER	0.0426938	1.53635
ILMN_1724250	GRN	0.0031556	1.53622
ILMN_1794914	UBTD1	0.0412593	1.53583
ILMN_1785661	FAM108B1	0.00685967	1.53477
ILMN_1690170	CRABP2	0.00624544	1.53411
ILMN_1668592	STON1	0.00668559	1.53351
ILMN_1775304	DNAJB1	0.0273985	1.53292
ILMN_1789419	EXOC3	0.0187102	1.53249
ILMN_1756541	MXD4	0.0232912	1.53022
ILMN_1755582	PCSK1N	0.00175309	1.52995
ILMN_1731418	SP110	0.000935811	1.52882
ILMN_1784300	TUBA4A	0.00669021	1.52721
ILMN_1778523	KLF9	0.00664629	1.52719
ILMN_1706441	UPK3B	0.0250409	1.52556
ILMN_1712708	TRIM47	0.00329149	1.52484
ILMN_1693242	ZNF296	0.000935811	1.52448
ILMN_1661197	CLCF1	0.0170861	1.52318
ILMN_1740426	RASD1	0.0137849	1.52278
ILMN_1666924	PINK1	0.00247791	1.52103
ILMN_1779147	ENC1	0.0160442	1.51855
ILMN_1720998	CA12	0.00308056	1.51796
ILMN_1701789	IFIT3	0.00339622	1.51742
ILMN_1745110	LAPTM4A	0.00525593	1.51632
ILMN_1791147	YPEL3	0.000254457	1.51454
ILMN_1781373	IFIH1	0.0259497	1.51445
ILMN_1802096	ABTB1	0.0295013	1.51436
ILMN_1760062	IFI44	0.0250677	1.51348
ILMN_1794017	SERTAD1	0.0114263	1.50977
ILMN_1688464	MAP6D1	0.00166836	1.50666
ILMN_1744381	SERPINE1	0.003644	1.50657
ILMN_1781374	TUFT1	0.00981101	1.50621
ILMN_1723843	CSNK2A2	0.000627989	1.5057
ILMN_1733110	RASSF7	0.000390061	1.50565
ILMN_1689446	EIF3G	0.0164394	1.50445
ILMN_1811272	GPR81	0.000932295	1.50323
ILMN_1879480		0.0198284	1.50218
ILMN_1771333	CD47	0.013607	1.49806
ILMN_1651496	HIST1H2BD	0.00141403	1.49579
ILMN_1770085	BTG2	0.0250352	1.4956
ILMN_1659845	KIAA0355	0.00224752	1.4952
ILMN_1655261	ERP27	0.000886242	1.49465
ILMN_1735877	EFEMP1	0.0327735	1.4942
ILMN_1787673	PLLP	0.0157195	1.49289
ILMN_1717165	IGBP1	0.00543061	1.49237
ILMN_1715674	ITPK1	0.00577236	1.49132
ILMN_1656482	OSBPL2	0.0138872	1.49087
ILMN_1795582	CHRD	0.000936637	1.48874
ILMN_1802615	CDK6	0.00209158	1.48643
ILMN_1745148	ZNFX1	0.00224066	1.48514
ILMN_1728478	CXCL16	0.00436886	1.48445
ILMN_1665865	IGFBP4	0.0180537	1.48187
ILMN_1774427	CALCOCO1	0.00518762	1.48021
ILMN_1726981	VEGFB	0.00889741	1.47844
ILMN_1732071	HIST2H2BE	0.0430891	1.47797
ILMN_1741711	DOPEY2	0.00215778	1.47483
ILMN_1664861	ID1	0.0370086	1.4746
ILMN_1757230	ZNF250	0.00141569	1.47435
ILMN_1719972	PLXNA3	0.00344036	1.47299
ILMN_1728298	SBK1	0.000889483	1.47174
ILMN_1770454	AGRN	0.0259345	1.47152
ILMN_1715625	C20orf94	0.0482467	1.47142
ILMN_1659936	PPP1R15A	0.00347882	1.47059
ILMN_1707727	ANGPTL4	0.0129498	1.46979
ILMN_1656057	PLAU	0.0180537	1.46912
ILMN_1742534	COL4A5	0.00395589	1.46807
ILMN_1790953	TBCB	0.046618	1.46585
ILMN_1707649	MPDZ	0.00764315	1.46518
ILMN_1757552	PTRF	0.00503824	1.46509
ILMN_1665526	TCEA2	0.0180975	1.46496
ILMN_1787251	DAAM1	0.00989621	1.46458
ILMN_1723480	BST2	0.0482467	1.46444
ILMN_1679322	SH2D4A	0.0243588	1.46435
ILMN_1781285	DUSP1	0.017097	1.46396
ILMN_1802888	ZNF185	0.00845532	1.4636
ILMN_1801610	METRNL	0.00339622	1.46288
ILMN_1746948	MYL5	0.0255866	1.46274
ILMN_1665964	GAB2	0.0145617	1.46252
ILMN_1795778	P4HA2	0.0159484	1.46199
ILMN_1789074	HSPA1A	0.0498268	1.46018
ILMN_1697267	PRKCZ	0.0353723	1.45913
ILMN_1676984	DDIT3	0.0127469	1.45877
ILMN_1738816	FOXO1	0.031279	1.45846
ILMN_1703123	AXUD1	0.00486798	1.45706
ILMN_1803018	KIFC2	0.00461353	1.45694
ILMN_1797585	MYO1B	0.0188064	1.45607
ILMN_1787691	CITED4	0.0295393	1.45559
ILMN_1742427	POLR1D	0.00919516	1.45427
ILMN_1797001	DDX58	0.00578905	1.45368
ILMN_1701875	ZYX	0.0434507	1.45345
ILMN_1662340	ZNF358	0.00268991	1.45198
ILMN_1768534	BHLHB2	0.00199816	1.44898
ILMN_1756139	LOC643310	0.00578905	1.44864
ILMN_1701216	BANP	0.0325214	1.44832
ILMN_1776724	LYPD6	0.00485722	1.44708
ILMN_1724686	CLDN1	0.00823619	1.44636
ILMN_1682930	SIPA1	0.000918043	1.44614
ILMN_1806907	PAWR	0.0125487	1.44388
ILMN_1800412	BMP1	0.00666453	1.43922
ILMN_1763433	TRIM9	0.00534445	1.43812
ILMN_1687315	RXRA	0.00366156	1.43801
ILMN_1755937	ANXA2	0.0123984	1.43544
ILMN_1723020	MAP3K1	0.0125479	1.43532
ILMN_1781155	LYN	0.00215778	1.433
ILMN_1765258	HLA-E	0.00746504	1.43078
ILMN_1750400	C19orf66	0.0111608	1.43076
ILMN_1796490	GRINA	0.00349459	1.4293
ILMN_1682717	IER3	0.0498592	1.4293
ILMN_1695606	EFNB3	0.0112676	1.42922
ILMN_1665696	EFNA4	0.00447128	1.42501
ILMN_1721833	IER5	0.00209158	1.42499
ILMN_1767068	SMAD6	0.0171147	1.42434
ILMN_1771987	SLC44A2	0.021603	1.42416
ILMN_1714756	YIPF5	0.0318412	1.42381
ILMN_1695745	DISP1	0.00484252	1.42339
ILMN_1704286	FXYD5	0.00123996	1.42314
ILMN_1699856	RALGDS	0.00553957	1.42153
ILMN_1651838	RND1	0.00989621	1.42116
ILMN_1739885	SLC41A3	0.0108743	1.42044
ILMN_1789196	TPM2	0.00955247	1.42033
ILMN_1806293	LIN7A	0.00971888	1.41872
ILMN_1815308	SDC1	0.00259308	1.41626
ILMN_1659106	PHLDA3	0.0151479	1.41595
ILMN_1754842	DLGAP4	0.0192145	1.41463
ILMN_1757604	TPM2	0.00143167	1.41386
ILMN_1669275	ZNF16	0.0109445	1.41359
ILMN_1655312	HPS5	0.0468267	1.41162
ILMN_1698732	PALLD	0.000932295	1.41101
ILMN_1781388	PGM5	0.0260798	1.41089
ILMN_1803367	EVI1	0.013607	1.40943
ILMN_1770787	DDAH2	0.0350301	1.40914
ILMN_1754529	SPG7	0.0233555	1.40864
ILMN_1654609	TIGA1	0.0138338	1.40747
ILMN_1774261	DOK4	0.00669021	1.40737
ILMN_1744006	GFOD2	0.0246869	1.40696
ILMN_1789095	BMPR2	0.0376372	1.40695
ILMN_1886769		0.0284935	1.4069
ILMN_1653180	TPM4	0.0332605	1.40634
ILMN_1795839	SCCPDH	0.00599942	1.40622
ILMN_1669064	ZNF823	0.0142768	1.40606
ILMN_1768031	DEDD2	0.0303065	1.40593
ILMN_1780825	RRAS	0.00485722	1.40534
ILMN_1678729	SIL1	0.0328318	1.40393
ILMN_1654639	HERC6	0.00764315	1.40377
ILMN_1671478	CKB	0.0281009	1.40374
ILMN_1782543	EEF1D	0.00567852	1.40262
ILMN_1679194	UGT2B7	0.0377641	1.40012
ILMN_1718977	GADD45B	0.0117008	1.40002
ILMN_1743402	SIX4	0.0198284	1.39809
ILMN_1665333	LOC645351	0.00615015	1.39803
ILMN_1803219	TMC4	0.0100646	1.39795
ILMN_1795561	CAMK1D	0.0297623	1.39746
ILMN_1677843	RAB24	0.0317945	1.39607
ILMN_1688886	GPC5	0.00567852	1.39477
ILMN_1796762	CCDC102A	0.0377488	1.39464
ILMN_1680110	C10orf116	0.0198284	1.39417
ILMN_1812769	UBXN1	0.000905515	1.39339
ILMN_1737089	CAPN5	0.0177497	1.39317
ILMN_1673509	RPL28	0.0297665	1.39296
ILMN_1681703	FOXO3	0.00989621	1.39216
ILMN_1806667	FRAS1	0.00891014	1.39174
ILMN_1703041	IDUA	0.013607	1.39174
ILMN_1904054		0.0180537	1.39127
ILMN_1688801	JPH3	0.0470707	1.39097
ILMN_1663631	BANP	0.00688548	1.3909
ILMN_1655876	TMEM159	0.0209546	1.39047
ILMN_1758613	RAPGEFL1	0.00141569	1.38954
ILMN_1762972	CHD9	0.0115117	1.38837
ILMN_1741356	PRICKLE1	0.00666453	1.38806
ILMN_1684873	ARSD	0.00624544	1.38576
ILMN_1801941	C1orf50	0.0216777	1.38563
ILMN_1778917	CDK7	0.00796206	1.38552
ILMN_1772686	FGD3	0.0287665	1.38524
ILMN_1777765	C12orf10	0.036329	1.38496
ILMN_1748616	GTF2F1	0.0115117	1.3848
ILMN_1778876	FAM179B	0.00573606	1.38337
ILMN_1712684	FAM20C	0.0426552	1.38331
ILMN_1685796	CSDE1	0.0283852	1.38222
ILMN_1663640	MAOA	0.0133593	1.38206
ILMN_1843932		0.0228549	1.3815
ILMN_1793371	KIAA0430	0.0243588	1.38107
ILMN_1784287	TGFBR3	0.0304349	1.37991
ILMN_1810852	LAMC1	0.0347935	1.37981
ILMN_1808011	FAM46B	0.0200587	1.37979
ILMN_1741371	TMEM8	0.0220641	1.37945
ILMN_1757837	C6orf165	0.0200587	1.37926
ILMN_1729217	FAM131A	0.0149824	1.37859
ILMN_1814106	C9orf169	0.00286281	1.37837
ILMN_1790797	VPS28	0.0487963	1.37825
ILMN_1733811	JUP	0.0351725	1.37809
ILMN_1750101	S100A11	0.013607	1.37778
ILMN_1710092	ZBTB46	0.00863503	1.3765
ILMN_1812297	CYP26B1	0.0114263	1.37611
ILMN_1742450	TAPBP	0.023668	1.3759
ILMN_1725108	SNX25	0.00813461	1.37573
ILMN_1729987	SRC	0.00561894	1.3755
ILMN_1808326	NPAS3	0.0200587	1.37505
ILMN_1676899	YEATS2	0.0130408	1.37501
ILMN_1659122	KLF10	0.0369157	1.37458
ILMN_1727288	EVPL	0.013607	1.37227
ILMN_1695687	SALL4	0.022396	1.3717
ILMN_1769299	MTMR11	0.00308056	1.37134
ILMN_1740772	APBB3	0.0377383	1.36916
ILMN_1654398	RGL1	0.0060506	1.36896
ILMN_1673138	ZBTB33	0.0430872	1.3669
ILMN_1844692	FOXO3	0.0414386	1.36687
ILMN_1670870	ALCAM	0.0142379	1.36674
ILMN_1741180	HEXDC	0.00417569	1.36643
ILMN_1715864	NHS	0.0148492	1.36639
ILMN_1712959	DUSP2	0.0206397	1.36631
ILMN_1760303	PIK3R1	0.0198284	1.36628
ILMN_1695475	SEMA3C	0.0156649	1.36532
ILMN_1658624	UBXN6	0.0284935	1.36395
ILMN_1656940	ABLIM3	0.00437691	1.36287
ILMN_1750409	RAB9A	0.0119184	1.36279
ILMN_1678531	N4BP3	0.00127961	1.36253
ILMN_1752968	LAMB2	0.0313592	1.36212
ILMN_1725485	RGS17	0.0125487	1.36179
ILMN_1736796	RB1CC1	0.00112468	1.36134
ILMN_1752582	RAB5B	0.0131027	1.36086
ILMN_1765122	MAP3K2	0.00470213	1.35917
ILMN_1812666	DNAJC15	0.0220641	1.3577
ILMN_1696027	LOC642333	0.0273762	1.35711
ILMN_1778560	ZNF3	0.000936637	1.35695
ILMN_1814971	TCF25	0.0350301	1.3565
ILMN_1654262	ZMAT3	0.00893075	1.3552
ILMN_1804415	SMAGP	0.0117104	1.35449
ILMN_1659047	HIST2H2AA3	0.00483345	1.35318
ILMN_1732176	AGPAT2	0.0178183	1.35257
ILMN_1687896	PIK3C3	0.0284935	1.34952
ILMN_1710284	HES1	0.0148773	1.34811
ILMN_1689110	NOB1	0.0190631	1.34746
ILMN_1777190	CFD	0.0180924	1.34715
ILMN_1763723	PTDSS2	0.00845532	1.34692
ILMN_1703174	FREM2	0.00767859	1.34636
ILMN_1688853	ZBTB9	0.0118515	1.3459
ILMN_1709590	PGM5	0.028028	1.34573
ILMN_1775822	PDGFB	0.00441139	1.34435
ILMN_1755221	LMAN2L	0.0389168	1.34427
ILMN_1751028	SERPINH1	0.0408552	1.34425
ILMN_1805765	CMYA5	0.00890097	1.34417
ILMN_1751886	REC8	0.0139026	1.34413
ILMN_1721605	SMYD2	0.00591584	1.34378
ILMN_1737426	PCMTD1	0.0301315	1.34378
ILMN_1724832	OVOL2	0.0389641	1.34321
ILMN_1682081	RNF19B	0.0237033	1.34266
ILMN_1695485	C9orf109	0.00215778	1.34234
ILMN_1788955	PDLIM1	0.00308056	1.34103
ILMN_1758831	RNF31	0.0470707	1.3406
ILMN_1779034	NADSYN1	0.00906522	1.33984
ILMN_1722809	NRCAM	0.00934663	1.33924
ILMN_1810147	ZNF524	0.0480572	1.33868
ILMN_1730032	BOK	0.0394145	1.33859
ILMN_1755536	PFDN5	0.0330985	1.33844
ILMN_1671703	ACTA2	0.0130429	1.33789
ILMN_1795181	DDX60	0.00201773	1.33707
ILMN_1790518	PHF16	0.0307561	1.33686
ILMN_1759341	MAN2B1	0.0178104	1.33558
ILMN_1730995	AFAP1L2	0.0460013	1.33496
ILMN_1732967	KIAA1949	0.0342738	1.33353
ILMN_1742611	C1orf52	0.047119	1.33345
ILMN_1797557	PLEKHA6	0.0230341	1.33332
ILMN_1781231	SLC25A38	0.0487963	1.33315
ILMN_1700690	VAT1	0.0218589	1.33305
ILMN_1713174	TCP11L1	0.0144531	1.33216
ILMN_1769135	DPP7	0.0362205	1.33215
ILMN_1699829	CTGF	0.0143012	1.33131
ILMN_1668411	FHL2	0.0154635	1.33081
ILMN_1718129	MAP2K5	0.0260814	1.32991
ILMN_1690921	STAT2	0.0153233	1.32921
ILMN_1745655	PEX16	0.0470358	1.32897
ILMN_1685854	C5orf53	0.0369641	1.32864
ILMN_1782412	IRX2	0.0132543	1.32858
ILMN_1739558	CRELD1	0.0114263	1.3283
ILMN_1666444	RBMS1	0.0131143	1.32796
ILMN_1792660	CAMSAP1L1	0.0243588	1.32772
ILMN_1739257	EIF3E	0.0252291	1.3277
ILMN_1705310	VEZF1	0.0138077	1.32719
ILMN_1725946	IRF6	0.0331049	1.3271
ILMN_1723123	FGFR3	0.0107155	1.32682
ILMN_1742935	ZNF33B	0.0266525	1.32672
ILMN_1682139	RAI14	0.00687503	1.32656
ILMN_1779171	SGSM2	0.00770662	1.32605
ILMN_1763144	NEU1	0.00252958	1.32596
ILMN_1684628	ZFP90	0.0281009	1.32589
ILMN_1767475	CERK	0.0125479	1.32588
ILMN_1706610	PLEKHA9	0.0443225	1.32572
ILMN_1793770	DNAJB6	0.00115904	1.32571
ILMN_1785618	SMTN	0.0415164	1.32503
ILMN_1880983		0.00617588	1.32468
ILMN_1745130	RBM9	0.00329106	1.32434
ILMN_1705991	GUSBL1	0.0226498	1.32309
ILMN_1772316	UNC84A	0.0472854	1.32286
ILMN_1673305	RHOC	0.0194887	1.32253
ILMN_1778381	LOC650029	0.0170018	1.32057
ILMN_1695370	LOC645968	0.0113723	1.31984
ILMN_1882590		0.028028	1.31927
ILMN_1706687	KLHL5	0.0170517	1.31888
ILMN_1710844	PARP10	0.0106364	1.31847
ILMN_1810289	FER1L3	0.0390351	1.31776
ILMN_1670875	PPM1D	0.00592021	1.31707
ILMN_1770425	CDIPT	0.0430891	1.31697
ILMN_1798061	ZFYVE26	0.00289564	1.31641
ILMN_1693630	C16orf7	0.0389276	1.31624
ILMN_1707748	PIM3	0.017097	1.31623
ILMN_1814165	SSBP3	0.035152	1.31596
ILMN_1723706	GRAMD4	0.0253077	1.3158
ILMN_1689274	NIPA1	0.0462141	1.3156
ILMN_1801216	S100P	0.04154	1.31516
ILMN_1661594	C2orf42	0.0390351	1.31448
ILMN_1747627	ABCA2	0.0187549	1.31398
ILMN_1711048	ZBTB17	0.049826	1.31355
ILMN_1669516	ZNF193	0.0164631	1.31276
ILMN_1812926	ANTXR2	0.00241294	1.31262
ILMN_1694432	CRIP2	0.0424286	1.31228
ILMN_1799062	NFKB2	0.00561894	1.31211
ILMN_1703650	TNIP1	0.0407619	1.31198
ILMN_1666376	TRIM56	0.0236288	1.31194
ILMN_1699265	TNFRSF10B	0.0392579	1.31188
ILMN_1810559	RHOQ	0.0279022	1.31173
ILMN_1813399	ATP2B1	0.00622279	1.31169
ILMN_1795285	PHF15	0.027889	1.31147
ILMN_1865764		0.00561894	1.30997
ILMN_1691731	PARP14	0.0201659	1.30953
ILMN_1713249	PHF19	0.0288288	1.30932
ILMN_1669433	KIAA0913	0.0128081	1.30842
ILMN_1755897	UGT2B7	0.0141489	1.30787
ILMN_1671404	SVIL	0.0298554	1.30767
ILMN_1768577	PCSK6	0.00557952	1.3071
ILMN_1713759	UBE2J1	0.0271646	1.30707
ILMN_1817255		0.021603	1.30637
ILMN_1798372	ANXA2P3	0.0277885	1.30502
ILMN_1763386	BID	0.017097	1.30486
ILMN_1671004	POLG2	0.0253068	1.30401
ILMN_1705346	NBEA	0.003706	1.30385
ILMN_1754600	FNBP1L	0.0116813	1.30377
ILMN_1720850	BAZ2B	0.010346	1.30376
ILMN_1706511	TEF	0.0472799	1.30359
ILMN_1668194	LMTK3	0.036594	1.30302
ILMN_1721046	PTMS	0.0114388	1.30294
ILMN_1747968	RBM33	0.028028	1.30232
ILMN_1685397	ITGA3	0.0232985	1.30218
ILMN_1813191	LOC653080	0.0235846	1.30155
ILMN_1667551	GUSBL1	0.022396	1.30113
ILMN_1805665	FLRT3	0.000905515	1.30051
ILMN_1736901	ZDHHC23	0.0291776	1.29967
ILMN_1795835	LOC338758	0.0224421	1.29797
ILMN_1761560	PHF13	0.0251426	1.29723
ILMN_1729749	HERC5	0.0112676	1.29655
ILMN_1756590	SYS1	0.0209546	1.29629
ILMN_1777049	ZNF160	0.0260384	1.29599
ILMN_1789492	ZDHHC8	0.0353723	1.29594
ILMN_1792587	VPS4B	0.0108743	1.29571
ILMN_1722056	ATP7B	0.0149533	1.2956
ILMN_1757106	2006-03-01	0.00960304	1.29516
ILMN_1687922	RP9	0.0403709	1.29493
ILMN_1709948	LOC651453	0.0201218	1.29474
ILMN_1788315	SIN3B	0.022709	1.29405
ILMN_1791226	NXN	0.00955247	1.29252
ILMN_1655563	KIAA0427	0.0200307	1.29001
ILMN_1660186	SYF2	0.0252291	1.29
ILMN_1678054	TRIM21	0.0232666	1.28988
ILMN_1674265	AVIL	0.0109024	1.28984
ILMN_1689953	CD81	0.0443269	1.28873
ILMN_1736184	GSTM3	0.00765039	1.28798
ILMN_1667356	CCDC128	0.0251367	1.28766
ILMN_1717639	SIK1	0.00461789	1.28764
ILMN_1655557	INTS6	0.0178035	1.28619
ILMN_1651828	CCT3	0.0238375	1.28537
ILMN_1731720	PDRG1	0.021603	1.28532
ILMN_1770665	HERC4	0.0480108	1.28474
ILMN_1677963	TMCC1	0.00889741	1.28444
ILMN_1688246	LOC642852	0.046618	1.28442
ILMN_1773906	NCOA4	0.00937092	1.28394
ILMN_1694466	ZBED1	0.00642959	1.2836
ILMN_1753143	RHPN2	0.0241218	1.28357
ILMN_1666178	TP53I13	0.0237648	1.28349
ILMN_1734153	GDI1	0.035058	1.2829
ILMN_1765636	FLJ22184	0.030497	1.28248
ILMN_1796339	PLEKHA2	0.003278	1.28234
ILMN_1806432	NT5C	0.0117104	1.28201
ILMN_1713505	NPC1	0.00989621	1.28197
ILMN_1752294	PCDH9	0.047388	1.28153
ILMN_1703102	LOC731777	0.0464496	1.27944
ILMN_1665205	ZNF260	0.0282152	1.27869
ILMN_1804652	PLEKHH3	0.0360237	1.27824
ILMN_1724211	GPRC5C	0.028415	1.27717
ILMN_1781400	SLC7A2	0.0138709	1.27703
ILMN_1703477	ARHGEF2	0.0131027	1.27655
ILMN_1658619	WWC1	0.00990649	1.27632
ILMN_1706498	DSE	0.00561894	1.27548
ILMN_1680403	SSR4	0.00132695	1.27478
ILMN_1797277	KIF3C	0.0313131	1.27373
ILMN_1655740	SNAI2	0.00366156	1.27222
ILMN_1731107	CCDC92	0.0320078	1.27209
ILMN_1801934	SERTAD3	0.0411905	1.27204
ILMN_1734440	C14orf133	0.0491793	1.27195
ILMN_1657810	PPM1M	0.0483243	1.27186
ILMN_1787923	PNPLA2	0.0149349	1.27108
ILMN_1908824		0.00510687	1.27104
ILMN_1737561	LOC88523	0.0412593	1.2709
ILMN_1730998	TSPAN6	0.0182797	1.27041
ILMN_1720829	ZFP36	0.0299631	1.27033
ILMN_1739810	RAI1	0.0372316	1.26999
ILMN_1653220	PITPNM1	0.0336746	1.26955
ILMN_1716973	POLM	0.00622279	1.26939
ILMN_1720965	TULP4	0.00729058	1.2682
ILMN_1733970	BAG1	0.0105264	1.2679
ILMN_1696991	DYRK1B	0.0326062	1.26716
ILMN_1737644	TMEM219	0.0169468	1.26711
ILMN_1766054	ABCA1	0.0287665	1.26686
ILMN_1805395	LTBP3	0.0494699	1.26683
ILMN_1725079	TSPAN31	0.036439	1.2667
ILMN_1688381	BPTF	0.046618	1.2666
ILMN_1722218	MBOAT7	0.0261034	1.26643
ILMN_1716875	CTNND2	0.00567852	1.26635
ILMN_1702124	LNX2	0.0198284	1.26626
ILMN_1726308	FAM10A4	0.0116458	1.26605
ILMN_1678004	TMEM41B	0.0191385	1.26569
ILMN_1903021		0.0254292	1.26428
ILMN_1789809	LOC644511	0.0150843	1.26386
ILMN_1714393	RAB24	0.0328318	1.26364
ILMN_1709044	TGIF2	0.0327546	1.26343
ILMN_1773337	DKK1	0.00224066	1.26329
ILMN_1797005	PGLS	0.0161576	1.26269
ILMN_1679025	LOC641848	0.0180537	1.26259
ILMN_1721704	FNTA	0.0144139	1.26241
ILMN_1785635	BRD3	0.0125639	1.26195
ILMN_1695853	CLK4	0.0204559	1.26153
ILMN_1813423	NAT15	0.0369157	1.26085
ILMN_1685170	ANXA11	0.00556779	1.26027
ILMN_1788384	C9orf5	0.00494869	1.2595
ILMN_1777477	C9orf106	0.00858839	1.25939
ILMN_1810962	PTPRK	0.0257713	1.25882
ILMN_1672687	LOC648099	0.034042	1.25843
ILMN_1653039	LOC642934	0.00806022	1.25793
ILMN_1786893	RBM5	0.0262215	1.25774
ILMN_1811574	MAPK8IP3	0.0251635	1.25619
ILMN_1675939	IFNGR1	0.0162338	1.25507
ILMN_1751743	XRCC1	0.0466576	1.25482
ILMN_1801845	DNAL4	0.028192	1.25461
ILMN_1774161	ARL15	0.023072	1.2543
ILMN_1679809	GSTP1	0.0477246	1.25423
ILMN_1805345	MOSPD3	0.0228122	1.25399
ILMN_1799614	PNPLA6	0.00920493	1.25394
ILMN_1776109	ZNF622	0.00578905	1.25339
ILMN_1694731	CLCN7	0.0132001	1.25253
ILMN_1811063	LOC649447	0.0483799	1.25243
ILMN_1752793	SAP18	0.00864231	1.25233
ILMN_1680738	C5orf13	0.00893075	1.25231
ILMN_1657744	C15orf17	0.0193424	1.25179
ILMN_1704385	LOC347376	0.00624544	1.25078
ILMN_1653501	SEMA3B	0.0149349	1.25067
ILMN_1701998	AFAP1	0.00422921	1.24997
ILMN_1800164	PPFIA1	0.0125614	1.2499
ILMN_1682818	TTLL3	0.0353723	1.24867
ILMN_1730799	PHF12	0.0494111	1.24743
ILMN_1727023	AMMECR1L	0.0351725	1.24739
ILMN_1683959	MED13L	0.0273349	1.2468
ILMN_1740351	KIAA0174	0.0330304	1.24672
ILMN_1708016	C20orf108	0.0377488	1.24669
ILMN_1754458	SDHALP1	0.0347404	1.2455
ILMN_1778087	ANXA8	0.0204924	1.24527
ILMN_1693401	KLHL28	0.0350301	1.24494
ILMN_1737650	DIO2	0.0353723	1.24374
ILMN_1716547	NAGK	0.04154	1.24335
ILMN_1651254	LPP	0.0395364	1.24176
ILMN_1786843	KCTD13	0.0405038	1.24115
ILMN_1880521		0.0471683	1.24094
ILMN_1698685	MATN2	0.00615015	1.24074
ILMN_1661833	ANKRD12	0.0333459	1.24057
ILMN_1775330	C15orf52	0.028028	1.23989
ILMN_1814859	DDX47	0.0218923	1.2394
ILMN_1761531	SGPL1	0.0433902	1.23889
ILMN_1764609	PWWP2B	0.0453713	1.23868
ILMN_1729801	S100A8	0.00664629	1.23853
ILMN_1680860	LEMD2	0.0336746	1.23842
ILMN_1768575	SFTPD	0.0229143	1.23833
ILMN_1708167	CDCP1	0.0441843	1.23831
ILMN_1708341	PDZK1	0.0255866	1.23782
ILMN_1903049		0.0128684	1.23773
ILMN_1689189	ZBTB3	0.0463368	1.23727
ILMN_1668134	GSTM1	0.0120757	1.23667
ILMN_1770399	C10orf107	0.0182797	1.23598
ILMN_1785330	SH3BP4	0.0378256	1.23497
ILMN_1661636	ZMYM2	0.0447207	1.23491
ILMN_1772459	RPS23	0.0347785	1.23458
ILMN_1811579	HOMER3	0.0487963	1.23403
ILMN_1790689	CRISPLD2	0.0426548	1.23362
ILMN_1712095	FOXO4	0.019202	1.23358
ILMN_1739847	EIF3D	0.0187263	1.23294
ILMN_1704446	SLC6A10P	0.0137674	1.23283
ILMN_1807514	ZNF394	0.0187263	1.23218
ILMN_1707199	WDR20	0.0140706	1.23197
ILMN_1800871	RAB6A	0.00622279	1.23147
ILMN_1659761	SNX29	0.0347404	1.23119
ILMN_1705477	CAMK1D	0.0444523	1.23045
ILMN_1901419		0.0307561	1.22943
ILMN_1769201	ELF3	0.0331853	1.22934
ILMN_1697448	TXNIP	0.0140077	1.22818
ILMN_1672128	ATF4	0.0110189	1.2279
ILMN_1701613	RARRES3	0.00893075	1.22774
ILMN_1707088	DENND2D	0.0430872	1.22712
ILMN_1705064	NDEL1	0.0141639	1.22614
ILMN_1695946	TRNP1	0.0377488	1.22564
ILMN_1710052	CPT1A	0.035152	1.22477
ILMN_1740169	TYRO3	0.0345809	1.22445
ILMN_1912185		0.019202	1.22347
ILMN_1666004	WASL	0.0445356	1.22326
ILMN_1746408	MIDN	0.0475517	1.22315
ILMN_1755383	LRRC1	0.0311969	1.22296
ILMN_1664010	ELF1	0.0242341	1.22243
ILMN_1790228	FURIN	0.00461353	1.22212
ILMN_1703695	C19orf12	0.0110189	1.22185
ILMN_1683063	PDE9A	0.0424771	1.22176
ILMN_1714599	CAMLG	0.0372316	1.22028
ILMN_1741564	DCTN4	0.0124197	1.2193
ILMN_1739199	FAM39DP	0.027303	1.21887
ILMN_1755792	STK38L	0.0124197	1.21829
ILMN_1780671	PLEKHG3	0.0255866	1.21788
ILMN_1708328	RAB11FIP3	0.047525	1.2174
ILMN_1798360	CXCR7	0.0343812	1.21697
ILMN_1683932	ZNF425	0.0434494	1.21678
ILMN_1775074	TUBGCP2	0.0434507	1.21646
ILMN_1665455	DCUN1D3	0.0491793	1.21625
ILMN_1786215	ZNF3	0.0444091	1.21584
ILMN_1709094	LIFR	0.0212289	1.21549
ILMN_1668228	LOC136143	0.00529719	1.21536
ILMN_1761155	PABPC1	0.0403709	1.21521
ILMN_1788251	SNN	0.0271953	1.21487
ILMN_1678323	AASS	0.0344787	1.21481
ILMN_1705737	IMPDH2	0.0300839	1.21472
ILMN_1770245	EPB41L5	0.0453551	1.21443
ILMN_1754489	FBXL20	0.0228652	1.2144
ILMN_1661519	KIAA0408	0.047119	1.21418
ILMN_1661755	FAM129B	0.0498268	1.21416
ILMN_1812392	TMSB10	0.0248066	1.2139
ILMN_1758719	NEDD9	0.0478822	1.21279
ILMN_1665357	EPS15	0.0111147	1.21173
ILMN_1733453	LOC284988	0.00818775	1.21145
ILMN_1651438	ZFPM1	0.0347404	1.21073
ILMN_1776723	PHF11	0.000905515	1.20921
ILMN_1669177	DHRS12	0.0468267	1.20885
ILMN_1661537	LEPROT	0.0479907	1.20869
ILMN_1706539	KDM3B	0.015002	1.2069
ILMN_1821280		0.0320036	1.20686
ILMN_1678203	RBMX2	0.00729058	1.20565
ILMN_1711988	KCNK12	0.0149824	1.20555
ILMN_1758672	FAM107B	0.0218768	1.20521
ILMN_1695290	FERMT2	0.00565528	1.20513
ILMN_1768311	LOC728888	0.0174128	1.20451
ILMN_1772261	GLG1	0.0180975	1.20381
ILMN_1711383	STK4	0.0237648	1.20305
ILMN_1723520	CD1A	0.0301019	1.20262
ILMN_1723542	ZNF137	0.043525	1.20235
ILMN_1670841	CPNE1	0.0378368	1.20144
ILMN_1733931	PDCD6	0.0295218	1.20138
ILMN_1737988	PRNP	0.0105593	1.20063
ILMN_1756146	WDR45	0.0498601	1.2005
ILMN_1672605	C7orf41	0.013607	1.19929
ILMN_1693941	IGSF9	0.0473153	1.19878
ILMN_1671839	TAF1C	0.0194181	1.1985
ILMN_1780141	TMEM66	0.0304349	1.19809
ILMN_1713156	MSL3L1	0.0253077	1.19748
ILMN_1745787	POLL	0.0474703	1.1962
ILMN_1706342	ZNF746	0.0284096	1.1945
ILMN_1814799	S100A13	0.048818	1.19385
ILMN_1777444	STX5	0.0353723	1.1937
ILMN_1912288		0.04154	1.1937
ILMN_1683175	C9orf23	0.0311098	1.19328
ILMN_1781001	SOCS3	0.0284935	1.19318
ILMN_1692865	VPS37D	0.023746	1.19306
ILMN_1677483	EXOSC1	0.033429	1.19296
ILMN_1801124	KIAA1826	0.0367671	1.19253
ILMN_1790162	LOC441155	0.0162203	1.19216
ILMN_1656934	REPS2	0.00588893	1.19211
ILMN_1693259	PDCD6IP	0.0238558	1.19206
ILMN_1777794	PRKCSH	0.0210454	1.19036
ILMN_1685631	KIAA0892	0.00421097	1.19033
ILMN_1724718	NCK2	0.0137674	1.18634
ILMN_1800465	LOC654042	0.0489678	1.18582
ILMN_1712673	SASH1	0.0496804	1.1852
ILMN_1772055	VARS	0.0365989	1.18493
ILMN_1759595	C22orf29	0.0377641	1.18461
ILMN_1691717	RHBDF2	0.0232094	1.1846
ILMN_1796497	PIP3-E	0.0260328	1.18431
ILMN_1680104	SLC35C1	0.0412087	1.18365
ILMN_1801833	ARHGAP24	0.0423974	1.18269
ILMN_1743950	IGFL1	0.0471082	1.18231
ILMN_1799082	ZNF609	0.0401608	1.18196
ILMN_1738523	MYD88	0.0383416	1.18138
ILMN_1804530	LOC653888	0.00624544	1.17927
ILMN_1789909	TBC1D9B	0.033429	1.17842
ILMN_1788062	SH3GL1	0.020806	1.1777
ILMN_1704637	C4orf23	0.0355729	1.17731
ILMN_1704972	TRIM5	0.0434507	1.1772
ILMN_1657797	FIBP	0.0426938	1.1771
ILMN_1741219	RRAGB	0.0226228	1.17688
ILMN_1779832	LOC400214	0.0475897	1.17685
ILMN_1724946	SPINT1	0.0125479	1.1754
ILMN_1727080	MYO6	0.0216163	1.17376
ILMN_1851540		0.0180537	1.17373
ILMN_1797684	PDCD2	0.0235583	1.17305
ILMN_1652464	TUBA3E	0.0345185	1.17227
ILMN_1806809	ZNF189	0.0261028	1.17072
ILMN_1661778	MTL5	0.031279	1.16929
ILMN_1791576	CHSY1	0.0421547	1.1691
ILMN_1726392	NIN	0.00578905	1.16908
ILMN_1755411	RBMS2	0.00428139	1.16862
ILMN_1718128	PABPC3	0.0244754	1.16844
ILMN_1664602	LOC143543	0.017097	1.16801
ILMN_1742224	SLTM	0.019584	1.16793
ILMN_1792305	ZNF318	0.0270829	1.16697
ILMN_1687978	PHLDA1	0.0269182	1.16694
ILMN_1809141	ING4	0.0257306	1.1666
ILMN_1769473	SETD2	0.00764315	1.16649
ILMN_1659610	TJP3	0.0165065	1.16636
ILMN_1652677	FAM89A	0.0107925	1.16612
ILMN_1701457	FAHD1	0.0165065	1.16586
ILMN_1684690	HDAC11	0.0336746	1.16542
ILMN_1689146	GABRP	0.0235024	1.16535
ILMN_1753547	STAT5A	0.00861534	1.1639
ILMN_1701244	ITFG2	0.0244754	1.16374
ILMN_1775853	MAGI1	0.049826	1.16355
ILMN_1689817	LCOR	0.047388	1.16241
ILMN_1753608	TMEM131	0.0266525	1.16148
ILMN_1803211	FBXO2	0.0424809	1.16136
ILMN_1656427	C17orf39	0.031279	1.16084
ILMN_1813669	ANKS1A	0.0198033	1.16062
ILMN_1704713	CSNK1G1	0.0263696	1.15896
ILMN_1670666	RAB12	0.0141489	1.15856
ILMN_1671728	CARD14	0.0444523	1.15833
ILMN_1672660	MBP	0.028192	1.15542
ILMN_1700518	HMGN4	0.0376372	1.15501
ILMN_1705900	ATXN10	0.0231098	1.15449
ILMN_1679617	LOC654155	0.0472085	1.15142
ILMN_1712798	ZNF608	0.0373899	1.15099
ILMN_1684210	NPAL3	0.00617588	1.15059
ILMN_1735788	TRIOBP	0.047119	1.15057
ILMN_1763524	LZTS2	0.0198742	1.14883
ILMN_1841620		0.0345809	1.14883
ILMN_1660691	RAB31	0.0384607	1.14697
ILMN_1798429	LOC653524	0.0345309	1.14618
ILMN_1719219	ZNF616	0.0116299	1.14578
ILMN_1671427	FBXW4	0.0466768	1.14399
ILMN_1697652	PLEKHB2	0.0180537	1.14211
ILMN_1736834	SKIL	0.00366156	1.14159
ILMN_1664920	C19orf12	0.0384928	1.14159
ILMN_1732725	SAPS3	0.0119849	1.14015
ILMN_1652073	LOC653658	0.0347393	1.13903
ILMN_1793118	TAX1BP1	0.00930045	1.13902
ILMN_1727183	ZNF763	0.0153499	1.13851
ILMN_1706960	KIAA1217	0.0459603	1.13731
ILMN_1780756	RBM23	0.0261739	1.13648
ILMN_1867588		0.0300057	1.13592
ILMN_1740160	PLCG1	0.046618	1.13538
ILMN_1700762	PBX4	0.0239866	1.13294
ILMN_1708537	RBPJ	0.0311418	1.13244
ILMN_1777644	PIB5PA	0.00861534	1.13238
ILMN_1778301	LOC652183	0.0491793	1.12781
ILMN_1662741	EDG4	0.0200307	1.12598
ILMN_1747217	C15orf41	0.0024615	1.12434
ILMN_1651690	PGBD4	0.0413198	1.12418
ILMN_1689378	CCRN4L	0.0472085	1.12396
ILMN_1671568	ECHDC2	0.0226498	1.12032
ILMN_1764398	TUBE1	0.0289864	1.11875
ILMN_1670723	MSL3	0.0448405	1.11259
ILMN_1697916	GYLTL1B	0.0423722	1.11163
ILMN_1724825	PCBP2	0.0347404	1.1109
ILMN_1798472	LOC550112	0.0154625	1.09804
ILMN_1751656	KLF11	0.0479409	1.08941
ILMN_1909191		0.0259392	1.08417
ILMN_1713058	PSTPIP2	0.0101952	-1.05494
ILMN_1760503	ZBBX	0.0496804	-1.06206
ILMN_1699703	ARCN1	0.0220641	-1.06618
ILMN_1809040	LDLRAP1	0.0125487	-1.08334
ILMN_1790577	SLC35F2	0.0430872	-1.08542
ILMN_1680378	RBM45	0.0187102	-1.08956
ILMN_1774589	IQCC	0.0312427	-1.09798
ILMN_1807710	HINT1	0.0458684	-1.10173
ILMN_1757415	C1orf163	0.0353723	-1.10208
ILMN_1715543	ACOT1	0.01705	-1.10942
ILMN_1765409	STAM	0.0281305	-1.11203
ILMN_1698085	C14orf21	0.0295393	-1.11314
ILMN_1691946	FAM173B	0.0157195	-1.11459
ILMN_1719072	LOC643011	0.0473323	-1.11549
ILMN_1764494	ATP5A1	0.0232101	-1.11591
ILMN_1732772	PPME1	0.0124197	-1.12149
ILMN_1795063	ZADH2	0.0218454	-1.12166
ILMN_1815283	SULT1A3	0.0155056	-1.12224
ILMN_1791507	LOC728772	0.0385213	-1.12385
ILMN_1686370	AGXT2L2	0.030442	-1.12499
ILMN_1749799	NSBP1	0.0468128	-1.12547
ILMN_1779751	C7orf55	0.0460013	-1.12986
ILMN_1916256		0.0377906	-1.13128
ILMN_1778371	CCBL2	0.0345809	-1.1329
ILMN_1765001	NAT6	0.0204914	-1.13358
ILMN_1788878	MORN4	0.0298006	-1.1342
ILMN_1809963	RSAD1	0.0403938	-1.13983
ILMN_1801348	GOT2	0.0101952	-1.14304
ILMN_1728676	KIAA0196	0.0184373	-1.1446
ILMN_1667796	HBA2	0.0499858	-1.14475
ILMN_1757627	ZMYND19	0.0430872	-1.14551
ILMN_1666757	SDHALP1	0.0261034	-1.14782
ILMN_1749424	C21orf122	0.0472854	-1.14943
ILMN_1679476	GART	0.046618	-1.14966
ILMN_1814823	FTL	0.047693	-1.15047
ILMN_1666208	C14orf106	0.04188	-1.15157
ILMN_1788022	CDKAL1	0.0167172	-1.15355
ILMN_1703228	AGFG2	0.0074113	-1.15417
ILMN_1798543	STK17B	0.0199434	-1.15493
ILMN_1723177	ANAPC5	0.0252187	-1.15704
ILMN_1711227	GMDS	0.0447321	-1.15958
ILMN_1743049	PWP1	0.0226498	-1.16023
ILMN_1799367	TXNDC14	0.0351266	-1.16062
ILMN_1683215	ZBED3	0.0496804	-1.16083
ILMN_1755649	SLC16A5	0.0308752	-1.16095
ILMN_1774211	FLJ45032	0.0413166	-1.16112
ILMN_1691809	PSMA1	0.0381241	-1.16131
ILMN_1802631	AGA	0.00767859	-1.16195
ILMN_1786281	ZSCAN12	0.0181799	-1.16216
ILMN_1684771	PGRMC1	0.00905215	-1.16266
ILMN_1756898	COQ9	0.0144264	-1.16341
ILMN_1760858	RAB8A	0.0445964	-1.16385
ILMN_1662184	C5orf34	0.0384871	-1.16403
ILMN_1678140	TTC4	0.0411905	-1.16433
ILMN_1712432	PSMD2	0.0223829	-1.16473
ILMN_1764415	ZNF585A	0.0484387	-1.16525
ILMN_1754332	LOC85389	0.0382344	-1.16598
ILMN_1704404	PSMD13	0.0470865	-1.16693
ILMN_1688565	ZNF580	0.0180537	-1.16852
ILMN_1797728	HMGCS1	0.0430872	-1.16902
ILMN_1758943	FAM5C	0.00920866	-1.17091
ILMN_1783598	CAB39L	0.047908	-1.17093
ILMN_1730612	DBNDD2	0.0296434	-1.17102
ILMN_1759743	SLC38A10	0.01759	-1.17153
ILMN_1684755	KAZALD1	0.0366074	-1.17173
ILMN_1717674	PEPD	0.0200587	-1.17221
ILMN_1758323	ACPP	0.00406768	-1.17308
ILMN_1676285	DHX9	0.0185054	-1.17319
ILMN_1673548	HSPC159	0.0103393	-1.17387
ILMN_1677041	CHUK	0.0266361	-1.17399
ILMN_1686454	TIFA	0.0400734	-1.17402
ILMN_1695959	C21orf63	0.0201374	-1.17423
ILMN_1697670	SRRM1	0.0440574	-1.17437
ILMN_1691567	GNPDA2	0.0330304	-1.17472
ILMN_1751258	NDUFA4	0.0247678	-1.17506
ILMN_1657483	SEC23B	0.0430872	-1.17533
ILMN_1672149	CHCHD1	0.0394232	-1.17553
ILMN_1783636	COX6A1	0.0389021	-1.17642
ILMN_1671191	UQCRC1	0.0400524	-1.17657
ILMN_1745213	PCDHB3	0.0373899	-1.17779
ILMN_1694980	NAGLU	0.0484718	-1.17782
ILMN_1707503	C1orf144	0.0175321	-1.17801
ILMN_1709894	CLPX	0.0196788	-1.17802
ILMN_1776125	TRK1	0.0491793	-1.17823
ILMN_1800787	RFTN1	0.0407592	-1.1783
ILMN_1783805	PNMA3	0.0110189	-1.17851
ILMN_1685112	TACO1	0.0224537	-1.1789
ILMN_1726743	MRPS30	0.0226829	-1.17927
ILMN_1654890	LENG8	0.0131546	-1.17932
ILMN_1719599	SYTL4	0.0426938	-1.17971
ILMN_1749368	HIST1H3H	0.0335027	-1.18001
ILMN_1774091	FECH	0.0291776	-1.1807
ILMN_1810729	UBL3	0.0361364	-1.18229
ILMN_1764803	SMU1	0.0483397	-1.1844
ILMN_1777397	MSX1	0.0257713	-1.18452
ILMN_1743187	C6orf120	0.0485721	-1.18512
ILMN_1743747	RUSC1	0.00644153	-1.18634
ILMN_1655504	IFT81	0.0186809	-1.1876
ILMN_1702237	FKBP1A	0.0260814	-1.18763
ILMN_1773763	MTA2	0.0425302	-1.18828
ILMN_1787345	FKBP11	0.00417569	-1.18842
ILMN_1738656	GLOD4	0.0494699	-1.18863
ILMN_1688721	FLJ44048	0.00339622	-1.18979
ILMN_1698715	NHLRC2	0.0186238	-1.1899
ILMN_1711799	C9orf40	0.0318412	-1.19015
ILMN_1757317	LARS	0.0261034	-1.19039
ILMN_1774062	SLC25A5	0.0419149	-1.19049
ILMN_1719468	EPM2A	0.0311098	-1.19087
ILMN_1718177	CYP20A1	0.0487963	-1.19148
ILMN_1683250	LOC440731	0.0259677	-1.1917
ILMN_1744403	KCNIP3	0.023668	-1.19317
ILMN_1688772	C8orf51	0.0233555	-1.19445
ILMN_1722127	RAD54B	0.00341279	-1.19452
ILMN_1775742	RNF128	0.0377906	-1.19643
ILMN_1813344	C20orf7	0.018607	-1.19766
ILMN_1697735	EWSR1	0.0237587	-1.1983
ILMN_1836744	PGP	0.0470707	-1.19866
ILMN_1720285	ESD	0.047119	-1.20013
ILMN_1700461	AARSD1	0.013335	-1.20104
ILMN_1777449	IFT74	0.0307022	-1.20163
ILMN_1787879	ARL2	0.0474703	-1.20183
ILMN_1763628	LOC653188	0.0198284	-1.20201
ILMN_1769883	IDE	0.0149533	-1.20221
ILMN_1688228	LOC145837	0.0385098	-1.20309
ILMN_1719403	MTX1	0.021603	-1.20366
ILMN_1766010	YARS	0.00386685	-1.20412
ILMN_1754738	AP1M1	0.0251561	-1.20469
ILMN_1760649	PCK2	0.0318654	-1.20494
ILMN_1811181	FLJ20444	0.00561757	-1.20503
ILMN_1671288	ODF2	0.0162436	-1.20563
ILMN_1778844	FAM5B	0.0284296	-1.20599
ILMN_1768719	RDH11	0.0347404	-1.206
ILMN_1778684	BRE	0.0180537	-1.20661
ILMN_1660021	M6PRBP1	0.0233699	-1.20662
ILMN_1775170	MT1X	0.0204783	-1.20777
ILMN_1794522	EIF5A	0.00666453	-1.20807
ILMN_1767260	CCDC138	0.0200633	-1.20944
ILMN_1662331	PDSS2	0.0377488	-1.21013
ILMN_1760849	NETO2	0.0245561	-1.21053
ILMN_1726755	COPS4	0.020806	-1.21112
ILMN_1787919	PARVB	0.034042	-1.21163
ILMN_1759344	LOC652226	0.022851	-1.21254
ILMN_1770732	COPS3	0.0328318	-1.2131
ILMN_1804476	GMPPA	0.0430891	-1.21375
ILMN_1810127	ZNF789	0.0413378	-1.21432
ILMN_1693287	POMP	0.0376372	-1.21458
ILMN_1691570	METTL5	0.046618	-1.21509
ILMN_1678966	SNRPF	0.0167679	-1.21585
ILMN_1680129	NSUN2	0.0347404	-1.21773
ILMN_1807359	CLEC11A	0.0424809	-1.21783
ILMN_1850238		0.039543	-1.21857
ILMN_1733249	GNB4	0.0247792	-1.21862
ILMN_1747099	LUC7L2	0.0456367	-1.21876
ILMN_1694106	GPD1L	0.046618	-1.21881
ILMN_1696419	STOM	0.0311369	-1.21975
ILMN_1690049	NGDN	0.0060506	-1.22301
ILMN_1662359	HIST1H4K	0.0314364	-1.22359
ILMN_1776173	PSMD7	0.0282152	-1.22405
ILMN_1660806	CSRP2	0.0332936	-1.22413
ILMN_1660840	PPPDE1	0.0254503	-1.22416
ILMN_1723211	L2HGDH	0.00556121	-1.22499
ILMN_1694323	GLE1	0.0346072	-1.22602
ILMN_1733603	NDUFC1	0.0139218	-1.22615
ILMN_1677113	RNF8	0.0342098	-1.22642
ILMN_1759453	UQCRB	0.0416215	-1.22661
ILMN_1799969	SNAPIN	0.0198397	-1.22796
ILMN_1755664	RPS26	0.0214952	-1.22996
ILMN_1731354	PARL	0.0469049	-1.23015
ILMN_1792672	POLR2D	0.00723724	-1.23042
ILMN_1697363	C20orf27	0.0412512	-1.23087
ILMN_1681634	PXMP2	0.0178204	-1.23099
ILMN_1733311	PIGB	0.0491793	-1.23124
ILMN_1701749	UQCRFS1	0.0059757	-1.23246
ILMN_1800659	PGM1	0.00485722	-1.23293
ILMN_1802906	LOC646900	0.0311098	-1.23297
ILMN_1673991	ATIC	0.01364	-1.23377
ILMN_1692276	GGPS1	0.0184581	-1.23388
ILMN_1680507	PPP2R2C	0.0207207	-1.23398
ILMN_1749521	SLC35E3	0.0345809	-1.23413
ILMN_1736995	C12orf66	0.0222879	-1.23424
ILMN_1777483	APOOL	0.0373899	-1.23428
ILMN_1709936	LOC90624	0.0389276	-1.23497
ILMN_1695576	MRPL24	0.0101952	-1.23527
ILMN_1716071	PAQR3	0.0374625	-1.2361
ILMN_1713901	KDELR3	0.0404832	-1.23729
ILMN_1725471	GK	0.00417569	-1.2375
ILMN_1666739	RBM15	0.0114388	-1.2377
ILMN_1808391	DUSP4	0.0170861	-1.23817
ILMN_1804137	ATP11C	0.0226222	-1.23875
ILMN_1704842	ARL4A	0.0146628	-1.23974
ILMN_1665065	SERINC3	0.0265347	-1.23989
ILMN_1664577	DLD	0.0144139	-1.24006
ILMN_1740742	UROD	0.0472085	-1.24055
ILMN_1746252	LOC391811	0.0244754	-1.242
ILMN_1690695	PEX11A	0.0420912	-1.24224
ILMN_1700074	SNORA62	0.0201659	-1.24266
ILMN_1701681	SEC11C	0.0385213	-1.24266
ILMN_1788489	HIST1H3F	0.0412593	-1.24373
ILMN_1764619	FLJ45244	0.0199565	-1.24424
ILMN_1750273	RPL23AP7	0.0378256	-1.24439
ILMN_1719826	LOC441956	0.0355729	-1.24445
ILMN_1745116	ABHD12	0.0273349	-1.24538
ILMN_1778677	MRS2	0.0400734	-1.24545
ILMN_1697998	FAM54A	0.0253077	-1.24557
ILMN_1754547	R3HDM1	0.0403925	-1.24626
ILMN_1660031	P2RY6	0.0340839	-1.24841
ILMN_1765621	HDGF	0.0054271	-1.24851
ILMN_1653129	CSTF2	0.00712634	-1.24889
ILMN_1745813	KIAA1279	0.0156424	-1.24943
ILMN_1734096	DCLRE1A	0.0453089	-1.24958
ILMN_1683146	FTH1	0.023266	-1.2496
ILMN_1751086	ATL3	0.0194181	-1.25066
ILMN_1658706	ST6GALNAC2	0.00622279	-1.25145
ILMN_1725090	CTHRC1	0.0430872	-1.25173
ILMN_1709085	GSG2	0.0400524	-1.25178
ILMN_1716876	MED27	0.0174935	-1.25214
ILMN_1667257	SDHB	0.0359035	-1.25224
ILMN_1753111	NAMPT	0.0283044	-1.2523
ILMN_1687864	POP5	0.00401854	-1.25261
ILMN_1745034	SLC11A2	0.0389682	-1.25396
ILMN_1768020	HAUS8	0.0125639	-1.25419
ILMN_1667060	HSF1	0.0184581	-1.25422
ILMN_1757636	C5orf35	0.047119	-1.25434
ILMN_1771835	NUP54	0.0414974	-1.25498
ILMN_1663220	MRPL22	0.0377906	-1.25602
ILMN_1774028	MTFR1	0.0164631	-1.25635
ILMN_1698996	SLC19A1	0.0420568	-1.25677
ILMN_1746457	GTF3C2	0.0489678	-1.25909
ILMN_1666385	CALM3	0.0408256	-1.25936
ILMN_1725183	TBCE	0.0232101	-1.25987
ILMN_1762262	PKIA	0.0403329	-1.25991
ILMN_1769902	HSPBP1	0.0455077	-1.26213
ILMN_1736546	SLC16A14	0.0377488	-1.26265
ILMN_1694479	WDR18	0.0109417	-1.26269
ILMN_1763404	LOC653226	0.0244754	-1.26291
ILMN_1770515	UBE2V2	0.040063	-1.2632
ILMN_1710001	RPL41	0.00273552	-1.26345
ILMN_1671742	UPF3A	0.0307561	-1.2639
ILMN_1728512	YWHAH	0.0345185	-1.2647
ILMN_1758311	NET1	0.0165623	-1.26574
ILMN_1672000	LOC642460	0.0133593	-1.26584
ILMN_1747078	HYLS1	0.0411905	-1.266
ILMN_1708605	LOC652481	0.0377906	-1.26625
ILMN_1758104	PRPS2	0.0140435	-1.26626
ILMN_1677237	CHCHD9	0.0199578	-1.26627
ILMN_1815115	CYC1	0.0389682	-1.26656
ILMN_1809607	PPIF	0.0440574	-1.26683
ILMN_1714952	ZNF703	0.0199208	-1.26707
ILMN_1768784	PSMC2	0.0239457	-1.2681
ILMN_1771149	MRPL19	0.0031675	-1.26896
ILMN_1674662	C15orf42	0.0342098	-1.26926
ILMN_1681737	TMSB15A	0.0293576	-1.26972
ILMN_1703092	RECQL4	0.0264935	-1.26976
ILMN_1670385	TUBAL3	0.00981101	-1.26986
ILMN_1712522	CEACAM6	0.0265347	-1.27
ILMN_1756572	COQ2	0.0266525	-1.27035
ILMN_1772957	FOXRED2	0.0371441	-1.27069
ILMN_1685774	LOC647340	0.0268348	-1.27105
ILMN_1748707	CRELD2	0.0430872	-1.27167
ILMN_1684563	SPIN4	0.035152	-1.27185
ILMN_1677756	UBE2D2	0.0172267	-1.27226
ILMN_1784880	TAF9L	0.0489678	-1.27327
ILMN_1796165	GLRX5	0.00257003	-1.27406
ILMN_1680782	PATL1	0.00900164	-1.27515
ILMN_1671250	CLIC4	0.0109445	-1.27577
ILMN_1681898	LOC647784	0.0296771	-1.27641
ILMN_1682935	LYPLAL1	0.0167679	-1.27652
ILMN_1733667	DHX35	0.023049	-1.27659
ILMN_1681221	C9orf100	0.0229143	-1.2773
ILMN_1781251	LOC653115	0.00642959	-1.27828
ILMN_1712530	AKAP1	0.048597	-1.27888
ILMN_1785413	ATP2C2	0.0452563	-1.2797
ILMN_1688971	NOL11	0.0417539	-1.28016
ILMN_1781281	EPPB9	0.0463368	-1.28028
ILMN_1749297	ACTL6A	0.0234722	-1.28035
ILMN_1746171	H2AFY	0.0157195	-1.28061
ILMN_1719627	SLC27A3	0.0100984	-1.28148
ILMN_1684346	TNFAIP8L1	0.00914181	-1.28245
ILMN_1677829	SLC9A6	0.047119	-1.28271
ILMN_1782084	ALG1L	0.0318507	-1.283
ILMN_1652735	RFXAP	0.0165065	-1.28327
ILMN_1751072	SRPRB	0.0344629	-1.28327
ILMN_1775744	MRPS16	0.0220641	-1.28361
ILMN_1736888	SAR1B	0.00861534	-1.28436
ILMN_1726659	THOP1	0.0476828	-1.28531
ILMN_1813295	LMO3	0.0434507	-1.28586
ILMN_1748926	TMEM209	0.0226498	-1.28617
ILMN_1675007	ZSCAN5A	0.00150017	-1.28735
ILMN_1750160	FASTKD3	0.0305466	-1.28815
ILMN_1655307	FAM136A	0.0282493	-1.2883
ILMN_1708110	TMEM144	0.0208634	-1.28906
ILMN_1738759	PIGT	0.0163578	-1.28971
ILMN_1667825	MLKL	0.0477246	-1.28978
ILMN_1806603	MESP1	0.0192145	-1.29013
ILMN_1691930	CBX6	0.0207247	-1.29023
ILMN_1712975	YIF1A	0.0270829	-1.29042
ILMN_1711810	PNKD	0.0311969	-1.29062
ILMN_1772207	LOC653377	0.0232664	-1.29093
ILMN_1790625	CBX3	0.00564783	-1.29131
ILMN_1685398	BAD	0.0385213	-1.2935
ILMN_1744316	TATDN3	0.00861534	-1.29356
ILMN_1700923	ATG4C	0.0220641	-1.29371
ILMN_1677887	PMS2	0.0307022	-1.29373
ILMN_1662846	GPR160	0.0293717	-1.2938
ILMN_1888074		0.0149533	-1.29454
ILMN_1695763	PDIA5	0.00617588	-1.29526
ILMN_1795007	C2orf47	0.0303877	-1.29598
ILMN_1751773	POLD3	0.0345185	-1.29769
ILMN_1808260	KIAA0564	0.0329764	-1.29829
ILMN_1794912	ATP5H	0.00861534	-1.29921
ILMN_1708516	PRTFDC1	0.030442	-1.29926
ILMN_1663664	MRPS10	0.0107155	-1.29931
ILMN_1761131	PECI	0.0362879	-1.29935
ILMN_1722820	KDELR3	0.00989621	-1.29979
ILMN_1739032	TMEM70	0.00494869	-1.29999
ILMN_1709039	RPL13	0.0180537	-1.30034
ILMN_1766916	RPAP3	0.030497	-1.30136
ILMN_1686871	PARP1	0.000500313	-1.30139
ILMN_1730084	COMT	0.0444523	-1.3021
ILMN_1760727	ANG	0.0451729	-1.30214
ILMN_1762666	DHRS4	0.0125479	-1.30221
ILMN_1704477	COX5A	0.000935811	-1.30231
ILMN_1666713	LYPLA1	0.0369488	-1.30254
ILMN_1718807	SMC3	0.021639	-1.30272
ILMN_1750711	MYO19	0.0487963	-1.30353
ILMN_1668861	LOC732165	0.0308752	-1.30414
ILMN_1667670	SLC25A15	0.0114263	-1.30423
ILMN_1738681	NUP62	0.0108932	-1.30451
ILMN_1655051	FAM86B1	0.0187263	-1.30466
ILMN_1773493	TIMM23	0.0246691	-1.30482
ILMN_1811468	IRX3	0.0259553	-1.30493
ILMN_1797793	BLVRB	0.0221509	-1.3051
ILMN_1718520	C10orf59	0.00744046	-1.30537
ILMN_1669273	PPT1	0.035152	-1.30559
ILMN_1673113	F2RL1	0.0297665	-1.30565
ILMN_1684746	IPO11	0.0184373	-1.30591
ILMN_1666306	SRRD	0.0347404	-1.30667
ILMN_1692517	LOC653381	0.0192145	-1.30712
ILMN_1735955	LOC644033	0.0480874	-1.30723
ILMN_1771026	GARS	0.0332145	-1.30745
ILMN_1733164	FBXO11	0.043671	-1.30787
ILMN_1726306	HMBS	0.0195303	-1.309
ILMN_1686387	PYCRL	0.039631	-1.3105
ILMN_1761996	SFRS5	0.0414386	-1.31097
ILMN_1814589	LOC728037	0.0129498	-1.31155
ILMN_1796923	LOC81691	0.039631	-1.31179
ILMN_1714765	LOC389599	0.0252983	-1.31206
ILMN_1745946	CCDC5	0.0173599	-1.31213
ILMN_1720311	SLC25A46	0.00308056	-1.31223
ILMN_1700831	SLC27A2	0.000855015	-1.31249
ILMN_1725773	DNAJC12	0.0166314	-1.31333
ILMN_1727540	C1orf112	0.0235583	-1.31334
ILMN_1681780	MKX	0.0461541	-1.31349
ILMN_1740430	SLC2A4RG	0.0210566	-1.31387
ILMN_1741455	USP30	0.0185896	-1.31452
ILMN_1769634	STRA13	0.0260798	-1.31479
ILMN_1779213	TFG	0.0170018	-1.31509
ILMN_1710962	TMEM97	0.00406957	-1.31564
ILMN_1749612	LOC729101	0.0296771	-1.31617
ILMN_1794505	SHFM1	0.047119	-1.31633
ILMN_1694810	PANX2	0.0359642	-1.31667
ILMN_1702637	BEX1	0.0378256	-1.31667
ILMN_1684929	TOPBP1	0.00565528	-1.31696
ILMN_1706841	PGAM4	0.00959889	-1.31733
ILMN_1707169	AGMAT	0.0221509	-1.31755
ILMN_1805658	LTV1	0.0332975	-1.31806
ILMN_1784985	PRRT3	0.0200307	-1.31923
ILMN_1704305	NIP7	0.0424458	-1.31965
ILMN_1675797	EPDR1	0.00693958	-1.32001
ILMN_1666325	ALG10B	0.028028	-1.32122
ILMN_1784367	HSPD1	0.0308226	-1.32245
ILMN_1696302	FABP5	0.034042	-1.32262
ILMN_1712577	FAM174A	0.0239894	-1.32281
ILMN_1719032	LSM3	0.015299	-1.32297
ILMN_1791949	PGBD1	0.00622279	-1.3234
ILMN_1651262	HNRNPAB	0.00653291	-1.32348
ILMN_1785424	ABLIM1	0.0046542	-1.32367
ILMN_1652797	FAM174B	0.0305562	-1.32419
ILMN_1756701	DHRS11	0.0143012	-1.32459
ILMN_1697802	LOC654244	0.00453943	-1.32507
ILMN_1737517	RPL29	0.0330304	-1.32509
ILMN_1671265	ING2	0.0383416	-1.32568
ILMN_1727618	C8orf38	0.0372316	-1.32605
ILMN_1660635	LACTB2	0.00356663	-1.32657
ILMN_1815723	NUP35	0.0209546	-1.32665
ILMN_1660111	UCHL3	0.00767859	-1.32817
ILMN_1755749	PGK1	0.0496804	-1.32882
ILMN_1727740	SYNCRIP	0.0297485	-1.32895
ILMN_1665571	LOC644869	0.0223829	-1.32926
ILMN_1741133	NME1	0.0128867	-1.32986
ILMN_1761474	LOC654189	0.033733	-1.3302
ILMN_1677018	HOXA4	0.0100646	-1.33042
ILMN_1660222	MTBP	0.00366156	-1.33051
ILMN_1682336	MASTL	0.0196788	-1.33092
ILMN_1759883	SRP9	0.00714202	-1.33116
ILMN_1691104	PGAM4	0.0434507	-1.33125
ILMN_1674620	SGCE	0.0164701	-1.33149
ILMN_1814122	MDC1	0.0329523	-1.33162
ILMN_1731640	MGC39900	0.0369488	-1.33173
ILMN_1747451	PLCXD1	0.0114388	-1.33207
ILMN_1664068	ERGIC1	0.0208634	-1.33207
ILMN_1720438	LOC653147	0.0327131	-1.33274
ILMN_1779852	LOC387934	0.00763949	-1.33278
ILMN_1683441	NCAPD3	0.00470213	-1.3329
ILMN_1694780	GCHFR	0.0378504	-1.3329
ILMN_1729453	TSPAN9	0.034915	-1.33404
ILMN_1726064	PAK1IP1	0.0261136	-1.33417
ILMN_1694126	KIF24	0.0296771	-1.33502
ILMN_1805973	GPR19	0.0237823	-1.33536
ILMN_1804479	MRPL18	0.0341349	-1.3358
ILMN_1687403	MRPL40	0.0046585	-1.33662
ILMN_1711878	ENOPH1	0.0385213	-1.33843
ILMN_1776674	SAC3D1	0.0105724	-1.33847
ILMN_1898124		0.043525	-1.33867
ILMN_1803564	YIPF1	0.00456886	-1.33874
ILMN_1662470	C10orf35	0.0233925	-1.33926
ILMN_1771903	NUP37	0.0121517	-1.33933
ILMN_1765232	C10orf59	0.0328318	-1.33962
ILMN_1733356	PREI3	0.0347935	-1.34022
ILMN_1797332	NARS2	0.0153499	-1.3412
ILMN_1687785	PPA2	0.0216504	-1.34163
ILMN_1770053	RBBP7	0.0356313	-1.34202
ILMN_1658607	DLEU2	0.0320036	-1.34265
ILMN_1669070	MIPEP	0.0458684	-1.34326
ILMN_1748916	C18orf55	0.0261028	-1.34352
ILMN_1689329	SCD	0.0106364	-1.34383
ILMN_1803423	ARHGEF6	0.0165065	-1.3442
ILMN_1696622	SLC38A6	0.00578905	-1.34448
ILMN_1772074	C19orf51	0.0378368	-1.34451
ILMN_1778104	ACADM	0.036084	-1.34564
ILMN_1669831	C6orf192	0.00861534	-1.34657
ILMN_1724437	GCAT	0.035578	-1.34765
ILMN_1781745	C9orf152	0.0128432	-1.34782
ILMN_1732066	CKMT1A	0.010346	-1.3482
ILMN_1713143	MRPL3	0.0360237	-1.34887
ILMN_1749875	LOC728715	0.020155	-1.349
ILMN_1733519	HMGB3	0.0166314	-1.34902
ILMN_1793220	GART	0.00666453	-1.34932
ILMN_1678037	HIRIP3	0.00756638	-1.34946
ILMN_1673073	WDR62	0.0118805	-1.3495
ILMN_1800573	RPS21	0.00835185	-1.34971
ILMN_1793474	INSIG1	0.0220641	-1.35024
ILMN_1697703	HPDL	0.0132543	-1.35057
ILMN_1793146	CCDC25	0.037995	-1.35097
ILMN_1776586	RPL26L1	0.0266525	-1.35162
ILMN_1719611	CCT6A	0.0279022	-1.35169
ILMN_1728024	TUBG1	0.0135164	-1.35231
ILMN_1676555	TTC26	0.00614556	-1.35318
ILMN_1738263	PIGU	0.0128331	-1.35373
ILMN_1782057	ATP8B2	0.0245561	-1.35469
ILMN_1689327	LOC730534	0.0237033	-1.35473
ILMN_1666967	BRP44L	0.00663933	-1.35552
ILMN_1666545	GCNT1	0.0430197	-1.35573
ILMN_1733956	IARS	0.028028	-1.35577
ILMN_1723117	IPO9	0.0241218	-1.3558
ILMN_1715476	LOC649970	0.00525993	-1.35619
ILMN_1656145	GOT1	0.0252291	-1.35628
ILMN_1658847	MGC61598	0.0484718	-1.35675
ILMN_1707763	ST7	0.0305562	-1.35766
ILMN_1665797	CSE1L	0.0271712	-1.35814
ILMN_1715540	TRAIP	0.00175309	-1.35869
ILMN_1723139	GPD2	0.0215026	-1.35871
ILMN_1767481	XRCC6BP1	0.0167267	-1.35971
ILMN_1709043	C9orf46	0.0267594	-1.36085
ILMN_1719906	HADH	0.0192071	-1.36101
ILMN_1778377	ERGIC1	0.0359642	-1.36171
ILMN_1769734	NT5C3	0.00247791	-1.36181
ILMN_1760593	CRY1	0.0471411	-1.36253
ILMN_1666553	SLC25A19	0.0248066	-1.36321
ILMN_1654421	MPHOSPH9	0.00666453	-1.36341
ILMN_1652215	LOC644310	0.0128684	-1.36361
ILMN_1727332	ATPIF1	0.0248066	-1.36409
ILMN_1785284	ALDH6A1	0.0233555	-1.36535
ILMN_1796130	LOC221710	0.0198284	-1.3662
ILMN_1732468	HSPA4L	0.0261739	-1.36663
ILMN_1705753	C3orf26	0.0297485	-1.36675
ILMN_1688818	LOC652864	0.0120757	-1.36698
ILMN_1682857	NDUFAF2	0.0168106	-1.36825
ILMN_1681437	DCXR	0.00435369	-1.36865
ILMN_1811014	PGR	0.00980337	-1.36869
ILMN_1734734	ZNF519	0.0344183	-1.37116
ILMN_1787628	NOP56	0.00759259	-1.37126
ILMN_1805132	PCDH19	0.0329764	-1.37138
ILMN_1685954	HMBS	0.0220875	-1.37201
ILMN_1800654	MCM7	0.0198284	-1.37232
ILMN_1663447	HNRNPA1	0.00604762	-1.37264
ILMN_1737396	PSMD14	0.00567852	-1.37282
ILMN_1744240	WDR67	0.00491765	-1.37345
ILMN_1696975	USP1	0.0204914	-1.37355
ILMN_1694533	RMND1	0.0248066	-1.37363
ILMN_1734486	C1orf19	0.0200307	-1.37369
ILMN_1764090	AK3L1	0.0212364	-1.3748
ILMN_1729374	ETFB	0.0295393	-1.37562
ILMN_1805842	FHL1	0.0301315	-1.3763
ILMN_1801118	C16orf33	0.00666453	-1.37632
ILMN_1766637	GLA	0.00579644	-1.37735
ILMN_1730201	DTNA	0.0175321	-1.37756
ILMN_1659682	GALK2	0.0305562	-1.3776
ILMN_1786426	TMEM149	0.0292337	-1.37764
ILMN_1657204	SAE1	0.000905515	-1.37808
ILMN_1777066	NIF3L1	0.00855323	-1.37897
ILMN_1700515	C17orf58	0.0411788	-1.37943
ILMN_1697567	TPM3	0.0296771	-1.38076
ILMN_1780769	TUBB2C	0.029345	-1.38083
ILMN_1709634	CMBL	0.0114263	-1.38086
ILMN_1760201	DNMT1	0.00718073	-1.38175
ILMN_1697614	NHP2L1	0.0411905	-1.3821
ILMN_1657949	RHEB	0.0109223	-1.38252
ILMN_1748770	CKAP5	0.00115904	-1.38264
ILMN_1688953	ARHGAP19	0.0167746	-1.38274
ILMN_1684802	TAF5	0.0102019	-1.38316
ILMN_1708105	EZH2	0.00209158	-1.38335
ILMN_1788701	PSIP1	0.0404366	-1.38406
ILMN_1674411	CKAP2	0.00889065	-1.38505
ILMN_1804090	SLC25A10	0.0200761	-1.38506
ILMN_1724062	LIN54	0.0165623	-1.38693
ILMN_1748591	ODC1	0.0125639	-1.38728
ILMN_1760741	NDUFA9	0.0127469	-1.38894
ILMN_1730698	ODF2	0.0283012	-1.39004
ILMN_1718424	MRPS28	0.014886	-1.39107
ILMN_1692790	ITGB3BP	0.0370697	-1.39144
ILMN_1716093	KRT10	0.0398248	-1.39185
ILMN_1801387	YEATS4	0.0422756	-1.39214
ILMN_1783610	HELLS	0.00131463	-1.39337
ILMN_1682494	RSRC1	0.0210445	-1.39585
ILMN_1712430	ATP5G1	0.0327557	-1.39594
ILMN_1656801	LOC651272	0.0445964	-1.39674
ILMN_1751368	HNRNPD	0.0216777	-1.39751
ILMN_1696407	SFRS2	0.0286921	-1.39759
ILMN_1703894	BOLA2	0.00759259	-1.39804
ILMN_1748476	NOP58	0.024325	-1.39874
ILMN_1790461	C6orf125	0.0085421	-1.39948
ILMN_1757697	NEIL3	0.0309046	-1.39965
ILMN_1699623	FAM81A	0.00717011	-1.40046
ILMN_1735347	MCEE	0.00525993	-1.40152
ILMN_1738027	BRCA1	0.00493919	-1.40155
ILMN_1683927	ITGAE	0.0297623	-1.40162
ILMN_1785191	TMEM14A	0.0162154	-1.40363
ILMN_1747303	DDX39	0.0195303	-1.40389
ILMN_1795927	PSPC1	0.0125639	-1.40403
ILMN_1662932	LCP1	0.00546472	-1.40452
ILMN_1718924	ETFA	0.0472784	-1.40618
ILMN_1813834	PRMT6	0.0284296	-1.40719
ILMN_1771039	GTSE1	0.0063095	-1.40747
ILMN_1757099	C10orf81	0.00194982	-1.40791
ILMN_1662364	AARS	0.00525993	-1.40852
ILMN_1730355	FGFR4	0.0327761	-1.41035
ILMN_1721623	APOO	0.00677498	-1.41095
ILMN_1684045	CDCA4	0.0120757	-1.41156
ILMN_1674710	LOC647784	0.0200633	-1.4139
ILMN_1660654	CDCA2	0.000552483	-1.41434
ILMN_1785198	POLE3	0.0176067	-1.41515
ILMN_1667839	UBR7	0.00366156	-1.41623
ILMN_1750722	RPS7	0.0237823	-1.41638
ILMN_1808584	FAM36A	0.0241208	-1.41875
ILMN_1671905	C10orf78	0.00395589	-1.41876
ILMN_1688479	LRRC42	0.00182483	-1.41922
ILMN_1658010	CENPI	0.000627989	-1.41968
ILMN_1661717	TFDP1	0.0251426	-1.41976
ILMN_1804448	MSI2	0.0317884	-1.42055
ILMN_1756043	WDHD1	0.000649854	-1.42101
ILMN_1656386	SEC24D	0.0183081	-1.42211
ILMN_1686920	CCDC58	0.00642959	-1.42237
ILMN_1801913	PPIH	0.013607	-1.42382
ILMN_1745593	STMN1	0.00377563	-1.42402
ILMN_1788363	MLH1	0.0268348	-1.42405
ILMN_1736042	ME1	0.0296708	-1.42453
ILMN_1682774	C13orf27	0.00483345	-1.4265
ILMN_1693410	BRI3BP	0.0110189	-1.42752
ILMN_1715661	TFAM	0.0305208	-1.42888
ILMN_1711171	CREB3L4	0.0114133	-1.42987
ILMN_1768393	SNRPD1	0.0225811	-1.43073
ILMN_1737947	LSM5	0.00484629	-1.43116
ILMN_1674782	LOC375295	0.0270829	-1.43597
ILMN_1728059	LOC645236	0.0131801	-1.43625
ILMN_1782938	SLC16A10	0.0222811	-1.43712
ILMN_1713875	NME1	0.00267837	-1.43742
ILMN_1781536	FAH	0.0484718	-1.43744
ILMN_1654691	FKBP3	0.0193424	-1.43905
ILMN_1787477	CENPO	0.00261571	-1.43939
ILMN_1762312	FOXRED1	0.0152493	-1.44042
ILMN_1750518	THOC4	0.0221509	-1.44047
ILMN_1811551	DERA	0.00630693	-1.44125
ILMN_1698733	CNIH2	0.0128432	-1.44219
ILMN_1705686	NRGN	0.0117551	-1.44349
ILMN_1691156	MT1A	0.0105231	-1.44391
ILMN_1708101	LMNB2	0.0129498	-1.44473
ILMN_1667966	C1orf24	0.00199826	-1.44566
ILMN_1803825	CXCL12	0.0377465	-1.44675
ILMN_1656628	WDR4	0.0019247	-1.44803
ILMN_1711005	CDC25A	0.00577791	-1.4495
ILMN_1658678	SAAL1	0.00361094	-1.44958
ILMN_1754051	RMI1	0.00971888	-1.45059
ILMN_1712918	NQO2	0.0226829	-1.45107
ILMN_1813544	OXCT1	0.0128432	-1.45168
ILMN_1749243	BANF1	0.0309995	-1.45169
ILMN_1881909		0.0200323	-1.45377
ILMN_1690223	CNTNAP2	0.0130429	-1.45597
ILMN_1758629	DONSON	0.00449002	-1.45653
ILMN_1725244	HAT1	0.0257713	-1.45724
ILMN_1898518		0.00366156	-1.45737
ILMN_1703946	ADORA2B	0.0368242	-1.45837
ILMN_1783333	C16orf61	0.00617588	-1.46231
ILMN_1704750	LOC647000	0.0118644	-1.46334
ILMN_1667994	AMD1	0.0388746	-1.46492
ILMN_1815924	NUP107	0.0227464	-1.4651
ILMN_1716400	FOXM1	0.00366156	-1.46567
ILMN_1654441	OAT	0.0328072	-1.46631
ILMN_1775235	AFF3	0.0311868	-1.46751
ILMN_1802627	PSMG3	0.00269124	-1.46925
ILMN_1787378	ADD3	0.0170629	-1.47262
ILMN_1700604	RBM14	0.0063095	-1.47307
ILMN_1700257	C4orf32	0.0239969	-1.47471
ILMN_1718830	NARG2	0.000935811	-1.47677
ILMN_1721713	EXOSC9	0.00150017	-1.47819
ILMN_1674522	HIGD1A	0.047119	-1.47853
ILMN_1778152	FIGNL1	0.00564869	-1.48031
ILMN_1656452	C16orf59	0.000466219	-1.48067
ILMN_1755677	FAM158A	0.00491765	-1.48349
ILMN_1756657	TRIM7	0.0345809	-1.48372
ILMN_1742981	TUBA1A	0.0440659	-1.48495
ILMN_1757497	VGF	0.0265917	-1.48649
ILMN_1788462	AMD1	0.0377488	-1.48765
ILMN_1756705	CHTF18	0.00308056	-1.48817
ILMN_1749930	TMEM48	0.00915044	-1.48913
ILMN_1725105	EEF1E1	0.0139218	-1.48987
ILMN_1786658	BOLA3	0.00654782	-1.49115
ILMN_1652913	EZH2	0.00485722	-1.49178
ILMN_1788099	LSM4	0.039631	-1.49371
ILMN_1807501	GINS4	0.0112676	-1.49398
ILMN_1712985	C17orf58	0.0223829	-1.49506
ILMN_1756550	NUP62CL	0.0271712	-1.49608
ILMN_1662617	PPP2R3C	0.0281071	-1.49627
ILMN_1686989	INSIG1	0.0180537	-1.49636
ILMN_1687652	TGFB3	0.0160618	-1.49799
ILMN_1788547	GCLM	0.0180919	-1.49836
ILMN_1719392	FH	0.000500313	-1.50079
ILMN_1655733	RFC2	0.0414974	-1.50245
ILMN_1809662	LOC440145	0.00519819	-1.50419
ILMN_1778890	PPIL5	0.00257003	-1.50456
ILMN_1702197	C9orf140	0.00889741	-1.50851
ILMN_1671843	PSRC1	0.0158465	-1.51213
ILMN_1748923	SMC2	0.00457064	-1.5131
ILMN_1671365	PRODH	0.00361094	-1.51328
ILMN_1798210	E2F7	0.000935811	-1.51426
ILMN_1743711	LOC650215	0.00309434	-1.51591
ILMN_1715179	SNRPA1	0.0432454	-1.51592
ILMN_1811933	SHMT1	0.00396726	-1.51634
ILMN_1800958	ALS2CR4	0.017097	-1.51969
ILMN_1771482	KIAA1324	0.0165065	-1.52035
ILMN_1801378	COQ3	0.00638704	-1.52234
ILMN_1797318	HSPA14	0.0168106	-1.52421
ILMN_1678781	SNX26	0.00455211	-1.52474
ILMN_1721901	CTNNAL1	0.0131027	-1.52561
ILMN_1703906	HJURP	0.0074113	-1.52971
ILMN_1691436	BLVRA	0.000649854	-1.53009
ILMN_1740265	ACOT7	0.0268348	-1.53104
ILMN_1799106	MOSC1	0.00515849	-1.53105
ILMN_1709484	BLM	0.00579644	-1.5314
ILMN_1703692	LOC647000	0.00989621	-1.5381
ILMN_1721457	RANBP1	0.0194181	-1.54045
ILMN_1651433	DCK	0.0252291	-1.54061
ILMN_1813270	ELF5	0.0204166	-1.54183
ILMN_1652580	POLD1	0.0051931	-1.54389
ILMN_1712386	C21orf45	0.0051351	-1.54764
ILMN_1797047	TMEM150C	0.0399512	-1.54819
ILMN_1807807	SKA2	0.00945584	-1.54958
ILMN_1761486	C13orf34	0.00196378	-1.54982
ILMN_1814151	AGR2	0.0139311	-1.55085
ILMN_1808661	TOMM5	0.00498052	-1.55103
ILMN_1678757	BCYRN1	0.00470213	-1.55127
ILMN_1874530	DIAPH3	0.00777611	-1.5558
ILMN_1665583	TUBB	0.0295218	-1.55616
ILMN_1708160	KPNA2	0.0273917	-1.55989
ILMN_1655913	NUCB2	0.00142069	-1.56013
ILMN_1716895	RPA3	0.00624544	-1.56167
ILMN_1764362	LYAR	0.028028	-1.56601
ILMN_1700896	SAP30	0.00293582	-1.56635
ILMN_1773964	H1FX	0.00401066	-1.56962
ILMN_1696266	XRCC3	0.00478024	-1.57178
ILMN_1726391	MRPL39	0.0226222	-1.57727
ILMN_1888359		0.00575675	-1.57949
ILMN_1674231	CHAF1B	0.00666453	-1.58055
ILMN_1757639	C3orf57	0.0125479	-1.58095
ILMN_1761882	C3orf14	0.00989621	-1.583
ILMN_1770044	CHRNA5	0.00278739	-1.58475
ILMN_1772743	PIGK	0.00199816	-1.58777
ILMN_1797693	BRI3BP	0.000390061	-1.589
ILMN_1800619	BRI3BP	0.0194918	-1.59374
ILMN_1661366	PGAM1	0.0167172	-1.59808
ILMN_1776052	LOC148915	0.0222811	-1.59918
ILMN_1760635	RAD51C	0.00304345	-1.59926
ILMN_1746359	RERG	0.0221509	-1.59961
ILMN_1742145	ESPL1	0.00567852	-1.61157
ILMN_1800261	TUBA1B	0.0125639	-1.61342
ILMN_1717056	TXNRD1	0.00567852	-1.61617
ILMN_1806818	MCM3	0.000255357	-1.62096
ILMN_1720373	SLC7A5	0.0137818	-1.62148
ILMN_1712389	CKLF	0.000399525	-1.62226
ILMN_1659285	PSMG1	0.00298467	-1.62695
ILMN_1740291	POLQ	0.00182337	-1.62899
ILMN_1725678	GFRA1	0.00627981	-1.62927
ILMN_1663751	CYCSL1	0.00401401	-1.62932
ILMN_1742779	CENPL	0.00386685	-1.63571
ILMN_1736176	PLK1	0.00223295	-1.63573
ILMN_1723944	TARP	0.0261739	-1.63925
ILMN_1739429	HS6ST2	0.00237486	-1.63954
ILMN_1785756	LOC731314	0.00346243	-1.64171
ILMN_1692511	TMEM106C	0.0445634	-1.64217
ILMN_1693905	HAT1	0.0412593	-1.64459
ILMN_1706779	LIG1	0.00855323	-1.64504
ILMN_1708508	PPM1E	0.00554629	-1.64754
ILMN_1668814	CENPM	0.00532669	-1.64939
ILMN_1676191	DARS2	0.0131546	-1.65153
ILMN_1682015	GAL	0.0401608	-1.65669
ILMN_1751776	CKAP2L	0.000469464	-1.65746
ILMN_1664369	DHTKD1	0.0146644	-1.65959
ILMN_1712413	RPL39L	0.0085421	-1.65978
ILMN_1696713	POLA2	0.00591584	-1.66006
ILMN_1658027	RAD54L	0.00629318	-1.66036
ILMN_1748352	CTSL2	0.00221923	-1.66378
ILMN_1774982	CDC42EP5	0.00074449	-1.66952
ILMN_1729112	CHPT1	0.00761239	-1.67432
ILMN_1754272	GINS3	0.00061067	-1.67517
ILMN_1810228	TTF2	0.00214488	-1.67524
ILMN_1732516	KNTC1	0.000787544	-1.67648
ILMN_1793360	APITD1	0.00213291	-1.67825
ILMN_1657547	CCDC34	0.00314345	-1.68133
ILMN_1781952	MGST1	0.00437691	-1.6818
ILMN_1768816	TMPO	0.0139026	-1.68542
ILMN_1761147	GABPB2	0.00478024	-1.68723
ILMN_1716279	CENPE	0.00622279	-1.68877
ILMN_1741801	CDC7	0.000960508	-1.68916
ILMN_1677765	LRP8	0.00067154	-1.69031
ILMN_1746699	SGOL2	0.00417569	-1.69147
ILMN_1688666	HIST1H2BH	0.0155056	-1.69304
ILMN_1651237	CDT1	0.00826734	-1.69376
ILMN_1674243	TFRC	0.0188656	-1.69978
ILMN_1685916	KIF2C	0.00579644	-1.70015
ILMN_1664630	CHEK1	0.00471134	-1.70052
ILMN_1787280	C1orf135	0.00268938	-1.70273
ILMN_1761939	TIPIN	0.000172505	-1.70816
ILMN_1693338	CYP1B1	0.0124197	-1.70865
ILMN_1701882	LOC653820	0.0059503	-1.71437
ILMN_1785570	SUSD3	0.00113576	-1.71506
ILMN_1727055	C12orf48	0.000469464	-1.71816
ILMN_1756326	CKS2	0.00309434	-1.71901
ILMN_1736816	C13orf3	0.00573606	-1.71932
ILMN_1799667	KIF4A	0.00548767	-1.72111
ILMN_1777233	E2F2	0.0124197	-1.72203
ILMN_1798108	C6orf211	0.037995	-1.72495
ILMN_1667050	PRPS1	0.00470213	-1.72615
ILMN_1676393	ATP5G1	0.0207207	-1.73283
ILMN_1652008	C15orf23	0.00118099	-1.73888
ILMN_1755834	FEN1	0.00518762	-1.73909
ILMN_1707858	H2AFZ	0.00199826	-1.75214
ILMN_1809439	HMGB1L1	0.0347404	-1.75277
ILMN_1712452	KIF20B	0.0221509	-1.75287
ILMN_1801766	CCDC109B	0.0163578	-1.75416
ILMN_1779264	PSMG1	0.006652	-1.75513
ILMN_1799516	DNAJC9	0.00106959	-1.76581
ILMN_1735093	TIMELESS	0.0103258	-1.76915
ILMN_1735157	GALNT12	0.00298467	-1.77068
ILMN_1683120	UNG	0.000905515	-1.77123
ILMN_1784860	RFC3	0.000469464	-1.77176
ILMN_1680955	AURKA	0.00313281	-1.77949
ILMN_1703324	PDSS1	0.00267837	-1.78019
ILMN_1695316	SLC39A8	0.00215778	-1.79514
ILMN_1791002	SKP2	0.00387516	-1.79779
ILMN_1731070	ORC6L	0.0282262	-1.79858
ILMN_1728225	KIAA1524	0.0026467	-1.79939
ILMN_1782403	PRR11	0.00366156	-1.7997
ILMN_1663195	MCM7	0.00399145	-1.80435
ILMN_1678423	SPA17	0.000366375	-1.81177
ILMN_1712803	CCNB1	0.00793303	-1.81811
ILMN_1665538	SKP2	0.00382837	-1.82131
ILMN_1711904	MXD3	0.00131463	-1.8236
ILMN_1702783	LOC652595	0.00197072	-1.82548
ILMN_1695414	ASF1B	0.013607	-1.83221
ILMN_1681503	MCM2	0.0130582	-1.84039
ILMN_1701289	MGC40489	0.0125138	-1.84693
ILMN_1729832	LOC653994	0.00194982	-1.84708
ILMN_1771593	RRM1	0.000936637	-1.84924
ILMN_1730825	SGOL1	0.00431591	-1.85498
ILMN_1796074	C18orf56	0.00309434	-1.85625
ILMN_1815184	ASPM	0.00158342	-1.85765
ILMN_1695386	RAD51C	0.0138872	-1.85863
ILMN_1657796	STMN1	0.000868152	-1.87232
ILMN_1761247	PIR	0.000505052	-1.87489
ILMN_1658143	RFC3	0.0010742	-1.87698
ILMN_1731184	MELK	0.00422921	-1.88021
ILMN_1710428	CDC2	0.00642959	-1.88422
ILMN_1755354	YBX2	0.00404532	-1.88556
ILMN_1720526	CENPN	0.00199826	-1.88905
ILMN_1738093	TMEM118	0.000466219	-1.88995
ILMN_1708672	ACAT2	0.00308056	-1.89707
ILMN_1815169	MCM5	0.00243777	-1.90218
ILMN_1781479	SUV39H1	0.000103283	-1.90351
ILMN_1678300	MGC40489	0.00422921	-1.90541
ILMN_1732150	KIAA0101	0.000905515	-1.90587
ILMN_1684217	AURKB	0.00823619	-1.91459
ILMN_1739645	ANLN	0.00162306	-1.91837
ILMN_1788166	TTK	0.00088683	-1.92363
ILMN_1709294	CDCA8	0.000935811	-1.93157
ILMN_1669881	TSPAN13	0.0127296	-1.93332
ILMN_1790537	C16orf75	0.0003081	-1.9357
ILMN_1710676	FBXO5	0.0180537	-1.93725
ILMN_1756162	EXOSC8	0.0204166	-1.94235
ILMN_1743397	PIGW	0.00123996	-1.94482
ILMN_1709257	DSCR6	0.00301021	-1.94694
ILMN_1732688	DUT	0.000241721	-1.95409
ILMN_1663390	CDC20	0.00704207	-1.95451
ILMN_1695357	CCDC99	0.000918043	-1.95746
ILMN_1814281	SPC25	0.00217089	-1.96487
ILMN_1655642	FANCI	0.00146698	-1.96954
ILMN_1659364	RFC5	0.000935811	-1.97185
ILMN_1810901	RNASEH2A	0.00517488	-1.97224
ILMN_1811472	KIF23	0.0212966	-1.97465
ILMN_1790100	C11orf82	0.000479521	-1.97516
ILMN_1781943	FAM83D	0.00300417	-1.98903
ILMN_1725260	CDC25C	0.00175309	-1.98917
ILMN_1724407	TACC3	0.00021872	-2.0006
ILMN_1728972	FAM64A	0.00484205	-2.00207
ILMN_1770978	TMEM83	0.000514999	-2.00371
ILMN_1700337	TROAP	0.00158523	-2.01822
ILMN_1737728	CDCA3	0.000455843	-2.02516
ILMN_1805828	VRK1	0.000855015	-2.02703
ILMN_1715616	PPIL5	0.000466219	-2.03096
ILMN_1654268	HMGB2	0.00537458	-2.03306
ILMN_1671933	CLCC1	0.000905515	-2.03636
ILMN_1704537	PHGDH	0.00505923	-2.0384
ILMN_1711470	UBE2T	0.000552483	-2.03906
ILMN_1664511	NDC80	0.000327816	-2.04523
ILMN_1695658	KIF20A	2.74472e-05	-2.059
ILMN_1673673	PBK	0.000192089	-2.06257
ILMN_1802819	DEPDC1	0.0036244	-2.06377
ILMN_1724489	RFC4	0.00233678	-2.06906
ILMN_1681754	GGH	0.00131463	-2.08284
ILMN_1776577	DSCC1	0.00426092	-2.09136
ILMN_1726720	NUSAP1	0.000192089	-2.09991
ILMN_1671906	MND1	0.00308056	-2.10065
ILMN_1721868	KPNA2	0.00657853	-2.10207
ILMN_1747911	CDC2	0.00049165	-2.10868
ILMN_1801257	CENPA	0.00158523	-2.11104
ILMN_1719870	FAM72D	0.000356256	-2.11121
ILMN_1679438	MLF1IP	0.00018621	-2.11616
ILMN_1808071	KIF14	0.0012364	-2.11726
ILMN_1720114	GMNN	0.00206427	-2.12971
ILMN_1673721	EXO1	0.00567852	-2.13043
ILMN_1722489	TFF1	0.000576827	-2.13708
ILMN_1759277	OIP5	0.000272885	-2.1377
ILMN_1716445	LOC727761	0.00206443	-2.16096
ILMN_1781942	HMMR	0.00468335	-2.16933
ILMN_1714730	UBE2C	0.00118099	-2.17242
ILMN_1806040	TYMS	0.00356663	-2.17713
ILMN_1719256	CKS1B	0.0018197	-2.18483
ILMN_1789123	PLK4	0.00339622	-2.2139
ILMN_1694502	PRIM1	0.00293582	-2.21825
ILMN_1763907	C6orf173	0.000469464	-2.24391
ILMN_1774336	POLE2	0.000192089	-2.25799
ILMN_1694177	PCNA	0.00058216	-2.26435
ILMN_1737184	CDCA7	0.000935811	-2.26454
ILMN_1737195	CENPK	0.00392145	-2.26573
ILMN_1810978	MUCL1	0.000272885	-2.2695
ILMN_1801939	CCNB2	0.000103283	-2.27231
ILMN_1794539	KIF11	0.000206796	-2.27783
ILMN_1728934	PRC1	0.000405182	-2.28463
ILMN_1658695	NUF2	0.00294719	-2.28479
ILMN_1704702	MCM7	0.00268415	-2.30636
ILMN_1809590	GINS2	0.000192089	-2.31176
ILMN_1686097	TOP2A	0.00167133	-2.31565
ILMN_1683450	CDCA5	0.000103283	-2.3355
ILMN_1753196	PTTG1	0.000935811	-2.35817
ILMN_1666305	CDKN3	0.000469464	-2.39364
ILMN_1777564	MAD2L1	0.00191098	-2.43628
ILMN_1670353	RAD51AP1	0.00131463	-2.45676
ILMN_1786065	UHRF1	0.000514999	-2.46917
ILMN_1751444	NCAPG	0.000241721	-2.47106
ILMN_1747016	CEP55	0.000317602	-2.48189
ILMN_1806037	TK1	0.00141569	-2.52512
ILMN_1765701	LOC399942	0.00221923	-2.57394
ILMN_1786125	CCNA2	0.00361094	-2.58335
ILMN_1796589	TRIP13	0.0003081	-2.59007
ILMN_1766658	PKMYT1	0.000627989	-2.62601
ILMN_1749829	DLGAP5	0.000192089	-2.63415
ILMN_1678669	RRM2	0.000743326	-2.7013
ILMN_1811387	TFF3	0.000103283	-2.9216

## Sheet: F vs ED (CLINICAL PROBES=1171)
Illumina Probe ID	Gene Symbol	p-value (NEWEST vs. FAIMoS)	Fold-Change (NEWEST vs. FAIMoS)
ILMN_1739508	LOC652493	0.0112802	2.0443
ILMN_1699214	LOC647450	0.00717529	2.01713
ILMN_1652199	LOC642113	0.0454406	1.80417
ILMN_1709880	RPLP0	0.00364276	1.70903
ILMN_1815205	LYZ	0.0185446	1.65677
ILMN_1760338	LOC643357	0.00724049	1.64303
ILMN_1674522	HIGD1A	0.00281196	1.61828
ILMN_1762436	UBB	0.0149964	1.60887
ILMN_1782538	VIM	0.00120438	1.58132
ILMN_1659550	LOC388654	0.0161425	1.57537
ILMN_1776005	DC2	0.0144226	1.57012
ILMN_1669523	FOS	0.034161	1.56906
ILMN_1687080	LOC402251	0.0125276	1.50892
ILMN_1795251	SPARCL1	0.00758851	1.49882
ILMN_1801205	GPNMB	0.00986452	1.49631
ILMN_1696911	FTHL8	0.00656532	1.4929
ILMN_1651680	LOC649150	0.0197266	1.48375
ILMN_1790529	LUM	0.0291331	1.47689
ILMN_1758895	CTSK	0.0050309	1.47682
ILMN_1750507	RPL9	0.00125702	1.47631
ILMN_1760347	SRGN	0.00519382	1.47304
ILMN_1762899	EGR1	0.0269949	1.47029
ILMN_1768227	DCN	0.0258192	1.46427
ILMN_1808405	HLA-DQA1	0.0181464	1.45944
ILMN_1724139	TMEM123	0.00991022	1.45079
ILMN_1808590	GUCY1A3	0.000498048	1.44522
ILMN_1810577	RPS4X	0.0105336	1.44507
ILMN_1772910	GAS1	0.00941749	1.44256
ILMN_1814998	FKSG30	0.0259295	1.44155
ILMN_1677198	C1R	0.0189153	1.44035
ILMN_1684306	S100A4	0.00636157	1.43846
ILMN_1780170	APOD	0.0442374	1.43589
ILMN_1802654	GLT8D2	0.00393524	1.43027
ILMN_1742981	TUBA1A	0.026392	1.42855
ILMN_1785071	SEPP1	0.025289	1.42784
ILMN_1810759	C2orf25	0.0174744	1.42045
ILMN_1782419	GNG11	0.00135386	1.42002
ILMN_1667966	C1orf24	0.00437508	1.41949
ILMN_1810810	EEF1A1	0.012763	1.41815
ILMN_1739496	PRRX1	0.00594224	1.41428
ILMN_1790761	POSTN	0.00983992	1.41339
ILMN_1655469	TSPAN3	0.0314505	1.41313
ILMN_1713182	LOC653879	0.0301012	1.40747
ILMN_1718924	ETFA	0.00655915	1.40736
ILMN_1777378	COMMD6	0.000739569	1.40674
ILMN_1658283	LOC642770	0.00678065	1.40637
ILMN_1766914	MFAP4	0.0483578	1.39965
ILMN_1725427	B2M	0.021475	1.39482
ILMN_1710734	GZMK	0.0469967	1.39256
ILMN_1772218	HLA-DPA1	0.0159403	1.3868
ILMN_1701749	UQCRFS1	0.000318157	1.38475
ILMN_1688780	S100A4	0.0162949	1.38474
ILMN_1801307	TNFSF10	0.00982602	1.38425
ILMN_2038774	EEF1A1	0.0190745	1.38417
ILMN_1664464	PTGDS	0.0227799	1.38402
ILMN_1784287	TGFBR3	0.0371206	1.38242
ILMN_1665823	LOC389787	0.00671018	1.38163
ILMN_1753279	HNRNPA0	0.00228801	1.3775
ILMN_1781285	DUSP1	0.0339933	1.37664
ILMN_1701195	PLA2G7	0.0192952	1.37439
ILMN_1800091	RARRES1	0.0360199	1.37094
ILMN_1807710	HINT1	0.010477	1.36978
ILMN_1679809	GSTP1	0.00460526	1.36658
ILMN_1689655	HLA-DRA	0.0212633	1.36488
ILMN_1704154	TNFRSF19	0.00731765	1.36226
ILMN_1791447	CXCL12	0.0419602	1.35942
ILMN_1700674	LOC653341	0.00713768	1.35797
ILMN_1796734	SPARC	0.0142788	1.35755
ILMN_1760062	IFI44	0.00759036	1.35716
ILMN_1656913	MDH1	0.0123001	1.35685
ILMN_1808196	GSTO1	0.0076579	1.35673
ILMN_1700950	LOC650982	0.028051	1.35392
ILMN_1772706	C10orf32	0.00799477	1.3519
ILMN_1751726	LOC649049	0.00504413	1.35003
ILMN_1656537	SNURF	0.0286669	1.3498
ILMN_1742887	LOC645058	0.00852818	1.34865
ILMN_1669032	PPIC	0.00687267	1.34842
ILMN_1702835	SH3BGRL	0.0241995	1.34528
ILMN_1720285	ESD	0.00199376	1.34487
ILMN_1789614	TPT1	0.000563974	1.34486
ILMN_1719032	LSM3	0.0172436	1.34321
ILMN_1661799	LOC643940	0.0116731	1.34302
ILMN_1714383	TPD52L1	0.0326034	1.34282
ILMN_1682774	C13orf27	0.00071848	1.34112
ILMN_1694398	EIF3S5	0.00596493	1.33844
ILMN_1718063	LIPA	0.0325837	1.33838
ILMN_1701653	ASCL1	0.0462633	1.33836
ILMN_1665280	SPCS1	0.00246032	1.33776
ILMN_1684349	IL2RB	0.029131	1.33699
ILMN_1760676	MORF4L1	0.00919529	1.33682
ILMN_1787949	RPS15A	0.00832736	1.33672
ILMN_1676765	LOC390354	0.0204825	1.33501
ILMN_1713901	KDELR3	0.00499798	1.3344
ILMN_1752728	FUCA1	0.00198998	1.33177
ILMN_1807042	MARCKS	0.00604639	1.33168
ILMN_1657857	TMEM14C	0.0245849	1.33165
ILMN_1723912	IFI44L	0.0424712	1.33122
ILMN_1783226	SSR2	0.00318659	1.33016
ILMN_1718961	BNIP3L	0.0129664	1.32922
ILMN_1714820	ITGB1	0.049997	1.32679
ILMN_1652464	TUBA3E	0.0131267	1.3265
ILMN_1695025	CD2	0.0333704	1.32539
ILMN_1707070	PCOLCE	0.0379021	1.32273
ILMN_1734895	SFT2D1	0.0204835	1.3216
ILMN_1767006	PSMB8	0.0278975	1.31906
ILMN_1810725	C1orf24	0.0102894	1.31897
ILMN_1706117	LOC391656	0.00167306	1.31827
ILMN_1731619	DAD1	0.000401642	1.3182
ILMN_1684211	SEC14L2	0.0326039	1.31291
ILMN_1715635	ATP6V0E1	0.00417843	1.31262
ILMN_1721035	MS4A6A	0.046158	1.31065
ILMN_1700316	LOC440055	0.0276254	1.31046
ILMN_1672961	LOC652624	0.0125475	1.31042
ILMN_1736585	TMED10	0.0476977	1.30926
ILMN_1814823	FTL	0.000420419	1.3092
ILMN_1790909	NFE2L2	0.0124015	1.30888
ILMN_1700025	LOC651559	0.0288498	1.30835
ILMN_1715886	CNOT7	0.0103624	1.30439
ILMN_1731546	RPL26	0.035632	1.30378
ILMN_1812312	NDUFS4	0.00229606	1.30337
ILMN_1672503	DPYSL2	0.0406188	1.30283
ILMN_1873034		0.039512	1.30264
ILMN_1665887	WDR61	0.0132617	1.3025
ILMN_1683792	LAP3	0.0306594	1.30108
ILMN_1761314	NFS1	1.36061e-06	1.30072
ILMN_1701293	COX7A2	0.0100923	1.30071
ILMN_1680208	LOC649564	0.00255935	1.30039
ILMN_1726245	TGFBR2	0.013599	1.29995
ILMN_1779014	TSPYL1	0.0438725	1.29986
ILMN_1787026	SEC61G	0.00810977	1.29882
ILMN_1654262	ZMAT3	0.0221589	1.29693
ILMN_1772929	ATP5J	0.0157592	1.29446
ILMN_1699574	NRP1	0.0199277	1.29347
ILMN_1658835	CAV2	0.00566218	1.29271
ILMN_1719641	SMOC2	0.0278343	1.29212
ILMN_1658416	MRPS18C	0.00527071	1.29162
ILMN_1788108	TXNDC5	0.00173869	1.29151
ILMN_1706841	PGAM4	0.0303881	1.28942
ILMN_1758543	CNIH	0.0468709	1.28885
ILMN_1672405	TMED7	0.0440453	1.28866
ILMN_1689327	LOC643657	0.0194421	1.28863
ILMN_1701173	KCNK6	0.00750953	1.28776
ILMN_1780799	ENPP2	0.0377702	1.28771
ILMN_1778977	TYROBP	0.0449986	1.28678
ILMN_1698019	LGMN	0.0433621	1.28489
ILMN_1793859	ALDH2	0.0331305	1.28314
ILMN_1731287	ARFGAP3	0.00431346	1.28261
ILMN_1712678	RPS27L	0.00123601	1.28257
ILMN_1742866	F2R	0.0486116	1.28234
ILMN_1801864	NTAN1	0.0116021	1.28168
ILMN_1805228	LRG1	0.0169844	1.28156
ILMN_1689712	LOC440927	0.0041912	1.28075
ILMN_1667081	CCND2	0.0120319	1.28002
ILMN_1658494	RGC32	0.00749282	1.2796
ILMN_1658830	C10orf26	0.0061056	1.27897
ILMN_1729112	CHPT1	0.0455527	1.27862
ILMN_1763452	EVI2B	0.0253443	1.27793
ILMN_1809291	TSPAN7	0.00244456	1.27684
ILMN_1651554	RGS5	0.0376479	1.27565
ILMN_1755883	RPS27A	0.0471774	1.27506
ILMN_1779252	TRIM22	0.00600312	1.27491
ILMN_1735347	MCEE	0.0118467	1.27413
ILMN_1728676	KIAA0196	0.0164949	1.27278
ILMN_1656951	APCDD1	0.0099144	1.27141
ILMN_1662426	AP2S1	0.00816207	1.2708
ILMN_1796458	GABARAPL2	0.0157936	1.27025
ILMN_1794825	ALDH3A2	0.0108615	1.26984
ILMN_1729318	TOR1AIP1	0.0160983	1.26928
ILMN_1661945	C14orf156	0.0324595	1.26902
ILMN_1662129	RCN2	0.0436235	1.26886
ILMN_1735461	DDX21	0.0373242	1.26824
ILMN_1757646	UFM1	0.0396633	1.26791
ILMN_1713934	LITAF	0.01183	1.26703
ILMN_1809467	VAMP5	0.00535758	1.26645
ILMN_1656682	AZIN1	0.0292769	1.26635
ILMN_1660832	LOC285053	0.0122882	1.26605
ILMN_1766851	TMEM126B	0.00814561	1.26424
ILMN_1770922	TMEM45A	0.0121189	1.26419
ILMN_1680437	EEF1G	0.00392957	1.26396
ILMN_1665781	LOC390466	0.0282905	1.26368
ILMN_1669424	YBX1	0.0297721	1.26307
ILMN_1666444	LOC648293	0.0144953	1.2629
ILMN_1679185	LEF1	0.0353686	1.26284
ILMN_1761519	EIF4G2	0.017966	1.26276
ILMN_1679324	EIF1B	0.040547	1.26044
ILMN_1719518	ARF4	0.00288789	1.25956
ILMN_1854469		0.0172096	1.25932
ILMN_1739497	GTF2H5	0.0141255	1.25863
ILMN_1857915		0.0462652	1.2583
ILMN_1667430	DEGS1	0.0221884	1.25815
ILMN_1759513	RND3	0.0202458	1.25812
ILMN_1653501	SEMA3B	0.0397251	1.25771
ILMN_1656791	RPS6	0.00833633	1.25654
ILMN_1695432	TPST2	0.00127506	1.25619
ILMN_1782621	RPS12	0.0011342	1.25551
ILMN_1739263	LOC643284	0.0202434	1.25488
ILMN_1790891	CKAP4	0.0292063	1.25431
ILMN_1773650	LRRN3	0.0023375	1.25362
ILMN_1814011	LOC650472	0.0180473	1.25295
ILMN_1800659	PGM1	0.0222208	1.25259
ILMN_1769633	CTSO	0.0180329	1.25221
ILMN_1744949	RHOBTB3	0.0338084	1.25108
ILMN_1702247	CCNDBP1	0.0215743	1.25081
ILMN_1710885	LOC387867	0.0279906	1.25029
ILMN_1785265	PLS3	0.037145	1.24939
ILMN_1757702	LOC647673	0.0260888	1.24919
ILMN_1808661	LOC644560	0.0126841	1.24775
ILMN_1659405	LOC649682	0.0372513	1.24694
ILMN_1795442	LAMA4	0.0130416	1.24691
ILMN_1680453	ITM2C	0.0120121	1.24676
ILMN_1756360	RPL35A	0.0121868	1.24613
ILMN_1695763	PDIA5	0.00424478	1.24508
ILMN_1679920	LOC651894	0.0367692	1.2445
ILMN_1693352	MRPL20	0.0465006	1.24418
ILMN_1687805	LOC391370	0.00131697	1.24327
ILMN_1723962	LXN	0.0434543	1.24307
ILMN_1788192	ARMCX1	0.0250623	1.24205
ILMN_1801795	LOC347544	0.0307878	1.24159
ILMN_1796537	FYB	0.0457026	1.24022
ILMN_1696360	CTSB	0.0423577	1.24003
ILMN_1665148	LOC648249	0.0387544	1.23982
ILMN_1810910	CFH	0.00633049	1.23978
ILMN_1745076	CLINT1	0.0103356	1.23975
ILMN_1706326	MRPL33	0.00372476	1.2395
ILMN_1784207	C1orf128	0.00301811	1.23896
ILMN_1712389	CKLF	0.0110743	1.23865
ILMN_1672366	PIGY	0.0298052	1.23832
ILMN_1807397	NDUFB5	0.041811	1.23805
ILMN_1701731	AKR1B1	0.0341233	1.23727
ILMN_1726030	GPX7	0.0347892	1.23645
ILMN_1737685	CRLS1	0.0213081	1.23589
ILMN_1716859	TDO2	0.00204904	1.23555
ILMN_1812191	C12orf57	0.00357257	1.23551
ILMN_1798189	COX7C	0.00791546	1.23527
ILMN_1674661	CIRBP	0.0401119	1.23362
ILMN_1703335	LACTB	0.0273259	1.23266
ILMN_1752631	CGGBP1	0.0110343	1.23232
ILMN_1691575	SNX2	0.0246532	1.23215
ILMN_1727194	CALU	0.0180127	1.23211
ILMN_1671404	SVIL	0.0275981	1.23116
ILMN_1743299	PXMP3	0.0375479	1.23005
ILMN_1662617	PPP2R3C	0.00327785	1.22903
ILMN_1691860	SPRY1	0.0475798	1.22869
ILMN_1781580	BRI3	0.00985815	1.22799
ILMN_1667050	PRPS1	0.00590324	1.22779
ILMN_1726839	DCUN1D5	0.0319946	1.2269
ILMN_1787567	TSC22D1	0.0226878	1.22647
ILMN_1683969	FKBP1A	0.0316024	1.22607
ILMN_1761797	CSTB	0.0129308	1.22525
ILMN_1737308	GLRX	0.0105552	1.22519
ILMN_1742456	OSTF1	0.00578929	1.22516
ILMN_1678170	MME	0.0228943	1.22484
ILMN_1660439	LOC646163	0.0460259	1.22474
ILMN_1768958	RASGRP1	0.0142346	1.22468
ILMN_1655740	SNAI2	0.000368871	1.22438
ILMN_1762747	RPL15	0.00222501	1.22433
ILMN_1722820	KDELR3	0.0311503	1.22425
ILMN_1800912	ZFP106	0.0206007	1.2241
ILMN_1756999	RBL2	0.0197722	1.22317
ILMN_1701114	GBP1	0.0304427	1.22289
ILMN_1751956	MGST3	0.0369211	1.22216
ILMN_1760683	SFRS9	0.00415556	1.22214
ILMN_1806692	HEXB	0.00513687	1.22173
ILMN_1740180	SNX3	0.020303	1.2214
ILMN_1664051	SEC22C	0.0264835	1.21976
ILMN_1781819	PAPSS1	0.00754835	1.21942
ILMN_1768867	AP3B1	0.00391431	1.21941
ILMN_1721989	ATP5F1	0.038598	1.21882
ILMN_1751816	MCTS1	0.0286246	1.21801
ILMN_1746090	STT3A	0.0283736	1.21637
ILMN_1784286	NDUFA1	0.00721652	1.21585
ILMN_1683146	FTH1	0.0423657	1.21582
ILMN_1683598	ACSL4	0.0333613	1.21452
ILMN_1732197	MN1	0.0113579	1.21439
ILMN_1814650	TRAPPC4	0.023523	1.2143
ILMN_1785268	CD58	0.00631937	1.21397
ILMN_1766505	COMMD10	0.0439602	1.21352
ILMN_1765858	CAB39	0.0116002	1.21333
ILMN_1742332	KCTD12	0.0466553	1.21332
ILMN_1769566	ATG3	0.00491253	1.21253
ILMN_1718988	DAZAP2	0.0181571	1.21241
ILMN_1652955	LOC648622	0.0126616	1.21233
ILMN_1712803	CCNB1	0.0198044	1.21124
ILMN_1754303	RPL30	0.0371632	1.21076
ILMN_1781386	WIPI1	0.00229866	1.20988
ILMN_1753353	SLBP	0.0140521	1.20967
ILMN_1815719	PLCG2	0.0249524	1.20859
ILMN_1712155	LOC641814	0.0304139	1.20759
ILMN_1679133	SERPINB1	0.0177433	1.20734
ILMN_1744914	FUCA2	0.00190348	1.20724
ILMN_1776216	TMEM32	0.0112276	1.20592
ILMN_1741003	ANXA5	0.0180105	1.20586
ILMN_1798874	TMEM85	0.0368912	1.20544
ILMN_1704477	COX5A	0.00690253	1.20541
ILMN_1812297	CYP26B1	0.0452171	1.20516
ILMN_1717674	PEPD	0.0070096	1.20496
ILMN_1656807	RPL27	0.000807478	1.20487
ILMN_1740171	DUSP11	0.0342074	1.20403
ILMN_1774062	SLC25A5	0.0383653	1.20379
ILMN_1788421	KCNK15	0.00194368	1.20378
ILMN_1779530	COG6	0.00331589	1.20344
ILMN_1865764		0.0386225	1.20309
ILMN_1721901	CTNNAL1	0.00788782	1.20275
ILMN_1713394	LOC441876	0.010038	1.20258
ILMN_1752046	SH2B3	0.0269371	1.20248
ILMN_1771966	BCCIP	0.0448283	1.20241
ILMN_1704369	LIMA1	0.0106567	1.20213
ILMN_1653133	SH3D19	0.0178722	1.20183
ILMN_1665761	BCL11B	0.0276318	1.20044
ILMN_1767642	C11orf46	0.00723022	1.20011
ILMN_1721704	FNTA	0.0135917	1.1998
ILMN_1687583	CAV1	0.00548035	1.19954
ILMN_1705515	UPF3A	0.0221217	1.19932
ILMN_1764494	ATP5A1	0.00214216	1.19849
ILMN_1660021	M6PRBP1	0.0262266	1.19837
ILMN_1733579	EVI2A	0.00917383	1.19804
ILMN_1665243	FKBP14	0.0448675	1.19793
ILMN_1737964	HIATL1	0.0166394	1.19654
ILMN_1695420	CLTA	0.00403249	1.19638
ILMN_1715324	HSD17B8	0.0200252	1.19599
ILMN_1656136	STAU	0.048836	1.19512
ILMN_1741727	QPCT	0.0139235	1.19505
ILMN_1707339	BTG3	0.0297477	1.19487
ILMN_1786139	VKORC1	0.0323231	1.19482
ILMN_1685608	NPTX2	0.0217486	1.19474
ILMN_1759952	PSMA5	0.035061	1.19446
ILMN_1698968	ASXL2	0.019303	1.1935
ILMN_1785113	MUT	0.0175117	1.19332
ILMN_2038772	RPS9	0.0222901	1.19292
ILMN_1719344	NRBF2	0.010734	1.19287
ILMN_1743145	LRAP	0.0484485	1.19273
ILMN_1701855	PPP1CC	0.0233475	1.19221
ILMN_1726755	COPS4	0.0186883	1.1922
ILMN_1753862	SRP54	0.0328344	1.19152
ILMN_1717099	DSCR3	0.00905827	1.19124
ILMN_1698487	SDHD	0.041447	1.19107
ILMN_1744665	EP300	0.00432292	1.1908
ILMN_1695316	SLC39A8	0.0413529	1.1906
ILMN_1764500	C3orf10	0.026195	1.19058
ILMN_1666670	RBX1	0.0168403	1.1904
ILMN_1655642	KIAA1794	0.00687612	1.18986
ILMN_1682428	C1orf59	0.0189467	1.18982
ILMN_1708611	RDX	0.0266059	1.1895
ILMN_1751143	C7orf23	0.0124391	1.18918
ILMN_1681845	PAPD4	0.0352538	1.18709
ILMN_1699585	BHLHB5	0.0386168	1.18685
ILMN_1715569	CCDC53	0.017243	1.18653
ILMN_1664750	TMBIM4	0.00942873	1.18648
ILMN_1690524	VAMP7	0.0440922	1.18631
ILMN_1680673	NT5DC1	0.0369517	1.18605
ILMN_1815552	NTAN1	0.0305408	1.1859
ILMN_1779852	LOC387934	0.0300817	1.18507
ILMN_1666471	QP-C	0.0165517	1.1846
ILMN_1811551	DERA	0.0073221	1.18458
ILMN_1678493	CHN1	0.0480406	1.18419
ILMN_1785202	STAT4	0.0341346	1.18367
ILMN_1656415	CDKN2C	0.00856313	1.18314
ILMN_1669070	MIPEP	0.0227768	1.18296
ILMN_1691104	LOC643025	0.0391405	1.18282
ILMN_1764109	C1R	0.0499131	1.18259
ILMN_1735438	GPM6B	0.000460306	1.18239
ILMN_1805104	ABAT	0.0442153	1.18158
ILMN_1746516	RPS25	0.0213814	1.18121
ILMN_1671693	C18orf10	0.0368634	1.18116
ILMN_1668582	CRBN	0.00634077	1.18034
ILMN_1704084	CMAH	0.0168399	1.18031
ILMN_1678766	DYNLT1	0.0333599	1.17986
ILMN_1664424	ZBED5	0.0181555	1.1797
ILMN_1737015	RPL39	0.0181664	1.17946
ILMN_1723874	MRPS6	0.0143496	1.1784
ILMN_1682953	LOC643025	0.0460409	1.17796
ILMN_1776173	PSMD7	0.0258846	1.17781
ILMN_1793894	ANAPC13	0.0300732	1.17768
ILMN_1679268	PELI1	0.0031491	1.17764
ILMN_1761322	FHOD3	0.0221071	1.17713
ILMN_1651950	TPST1	0.0370632	1.17681
ILMN_1794190	CCPG1	0.0274967	1.17677
ILMN_1661173	TRIP4	0.0145802	1.17665
ILMN_1766411	AP1S2	0.033588	1.17663
ILMN_1656373	BNC2	0.010285	1.17595
ILMN_1800354	CST3	0.0177732	1.17561
ILMN_1762725	EIF3EIP	0.0333084	1.175
ILMN_1772702	SRP46	0.0348419	1.17483
ILMN_1790881	HNMT	0.0432478	1.17456
ILMN_1704665	GPM6B	0.0225054	1.17436
ILMN_1741021	CH25H	0.0262855	1.17353
ILMN_1723007	ZCCHC9	0.036123	1.17315
ILMN_1703374	NAV1	0.0152359	1.1721
ILMN_1680130	DYM	0.0228211	1.17209
ILMN_1731174	LOC645656	0.0288757	1.17189
ILMN_1657612	LOC285900	0.032377	1.17151
ILMN_1799026	PCDH18	0.0317653	1.17134
ILMN_1735220	CAV2	0.0112887	1.17132
ILMN_1713031	PGCP	0.0175855	1.1713
ILMN_1685774	ATP5C1	0.044454	1.17096
ILMN_1683597	LOC647099	0.0288695	1.17094
ILMN_1700518	HMGN4	0.0261175	1.17081
ILMN_1657949	RHEB	0.0268456	1.16922
ILMN_1663416	LOC645296	0.00851156	1.16887
ILMN_1704315	LOC389435	0.0219539	1.16872
ILMN_1795893	TMEM167B	0.0287005	1.16833
ILMN_1767113	AOX1	0.0260857	1.16771
ILMN_1653220	PITPNM1	0.0221446	1.16768
ILMN_1655622	PRKRIR	0.0177574	1.1676
ILMN_1781942	HMMR	0.0179961	1.16743
ILMN_1733094	STEAP1	0.0318011	1.16703
ILMN_1762281	DCTN3	0.0190886	1.16664
ILMN_1745172	ILF2	0.0335669	1.16641
ILMN_1687403	MRPL40	0.0310912	1.16604
ILMN_1694742	RPS29	0.0117998	1.16576
ILMN_1769245	GLIPR1	0.0394018	1.16544
ILMN_1789702	GBE1	0.0291024	1.16532
ILMN_1739335	LOC400948	0.0370667	1.16531
ILMN_1658526	RYK	0.0487026	1.16486
ILMN_1772888	LOC650954	0.0481865	1.16472
ILMN_1660063	POLE4	0.0216171	1.16418
ILMN_1679482	TUBA3C	0.0454426	1.16418
ILMN_1655930	ELL2	0.0410162	1.16392
ILMN_1703692	LOC647000	0.0260323	1.16348
ILMN_1707810	RPS5	0.0391753	1.16247
ILMN_1689456	ZBTB20	0.0324925	1.16234
ILMN_1739274	PDHB	0.0368362	1.16216
ILMN_1691942	CCNI	0.0386638	1.16198
ILMN_1790098	OGN	0.0489508	1.16177
ILMN_1815479	NOLA3	0.034226	1.16109
ILMN_1737074	RPS2	0.0385104	1.16098
ILMN_1669252	CUL2	0.024215	1.15911
ILMN_1786429	P2RY5	0.0274764	1.15836
ILMN_1695792	CUL4A	0.0341538	1.15595
ILMN_1653026	PLAC8	0.0405437	1.15547
ILMN_1694075	GADD45A	0.0428771	1.15542
ILMN_1788457	ABCC4	0.0170005	1.15515
ILMN_1673899	FAM57A	0.0469387	1.15487
ILMN_1720114	GMNN	0.0462812	1.15458
ILMN_1658695	CDCA1	0.000640028	1.1544
ILMN_1707634	CMC1	0.0338777	1.15374
ILMN_1660498	LOC643057	0.0241694	1.15366
ILMN_1781999	ABCF2	0.0308969	1.15291
ILMN_1661886	APEX1	0.027208	1.15235
ILMN_1739161	PPAP2A	0.0152765	1.152
ILMN_1812902	CYYR1	0.0393418	1.15198
ILMN_1812638	ATP5L	0.0436136	1.15138
ILMN_1658399	KLRG1	0.0203043	1.15136
ILMN_1781419	C11orf73	0.046049	1.15075
ILMN_1799848	ANKRD22	0.0328622	1.15023
ILMN_1802027	MGST2	0.00948226	1.14963
ILMN_1728535	COPZ1	0.042501	1.14941
ILMN_1733666	PLDN	0.0241023	1.14852
ILMN_1682910	SLC35B3	0.0192669	1.14825
ILMN_1780898	PRKCH	0.0352653	1.14806
ILMN_1814859	DDX47	0.0387209	1.14728
ILMN_1796339	PLEKHA2	0.0369507	1.14658
ILMN_1693220	AKAP11	0.0395848	1.14365
ILMN_1742813	MGC23909	0.0447685	1.14329
ILMN_1763007	HIAT1	0.0390421	1.14311
ILMN_1738589	MGLL	0.022183	1.14229
ILMN_1658995	ACOT9	0.0123472	1.14161
ILMN_1774584	C2orf28	0.0320454	1.14155
ILMN_1765684	C19orf70	0.027389	1.14078
ILMN_1758658	FADD	0.0321595	1.14075
ILMN_1658259	DRG1	0.0444312	1.14057
ILMN_1744649	PSMB5	0.0455455	1.1402
ILMN_1700923	ATG4C	0.0202126	1.13925
ILMN_1669447	PYHIN1	0.0372998	1.13858
ILMN_1724959	SEC31A	0.0426643	1.13779
ILMN_1750693	SSR1	0.0461523	1.13705
ILMN_1797604	CAP1	0.0150064	1.13675
ILMN_1652230	LOC642892	0.0360023	1.13672
ILMN_1791593	MGC24039	0.0400102	1.13548
ILMN_1659411	POLR2C	0.0144683	1.13542
ILMN_1783709	RRAGA	0.0498224	1.13542
ILMN_1673185	CPSF2	0.0250517	1.13482
ILMN_1654737	TRIM32	0.0197901	1.1345
ILMN_1675421	LOC389293	0.027357	1.13426
ILMN_1674344	PARD6G	0.0217181	1.13379
ILMN_1749829	DLG7	0.0482147	1.13347
ILMN_1759250	TAP2	0.0178936	1.13279
ILMN_1701933	SNCA	0.0306099	1.13262
ILMN_1764415	ZNF585A	0.00772686	1.13238
ILMN_1766798	CENTB2	0.0287031	1.13159
ILMN_1679655	TMEM113	0.0297957	1.13065
ILMN_1743635	ALG14	0.0239612	1.13042
ILMN_1753931	CDO1	0.0420881	1.12963
ILMN_1763260	HIF1A	0.0370332	1.12877
ILMN_1688158	CYB5R4	0.0284385	1.12841
ILMN_1745946	CCDC5	0.0338303	1.1284
ILMN_1658351	FIS1	0.0216883	1.12704
ILMN_1765044	CUTC	0.0350835	1.12666
ILMN_1808860	STX5A	0.0313989	1.12658
ILMN_1726327	AMY1B	0.0322339	1.12642
ILMN_1694219	ARIH1	0.0417737	1.12642
ILMN_1746763	ECM2	0.00407017	1.12532
ILMN_1708779	GNLY	0.0148928	1.12501
ILMN_1677887	PMS2	0.0293276	1.12496
ILMN_1770732	COPS3	0.0127961	1.12486
ILMN_1685077	SNX7	0.01097	1.12376
ILMN_1759883	SRP9	0.0298674	1.12364
ILMN_1732678	KERA	0.0221628	1.12314
ILMN_1812070	ABCB1	0.0160846	1.12241
ILMN_1677429	TWIST2	0.0161026	1.12208
ILMN_1710428	CDC2	0.0320221	1.11749
ILMN_1782761	ARHGAP20	0.00217986	1.11733
ILMN_1794187	FBXL3	0.044872	1.11721
ILMN_1778347	NUDT2	0.0091424	1.11633
ILMN_1815121	PLAGL1	0.00787893	1.11563
ILMN_1755134	HSPA4	0.0498805	1.11533
ILMN_1677092	GEM	0.0407686	1.11512
ILMN_1799150	PPM1J	0.0413674	1.11381
ILMN_1722294	CPNE8	0.0154074	1.11373
ILMN_1777584	KARS	0.0373886	1.11366
ILMN_1774930	CDC14A	0.0305589	1.11285
ILMN_1654210	CD1C	0.0428231	1.11226
ILMN_1664614	FAU	0.0348271	1.11216
ILMN_1815707	CALML4	0.0125947	1.11199
ILMN_1760575	PTP4A1	0.0333545	1.11116
ILMN_1672024	LOC389293	0.0464588	1.11016
ILMN_1662973	CD82	0.0438477	1.10934
ILMN_1762262	PKIA	0.046154	1.10755
ILMN_1708340	DAPK1	0.0422986	1.10702
ILMN_1705984	HNMT	0.0329354	1.10666
ILMN_1730765	DUSP22	0.0430577	1.10625
ILMN_1690561	GZMM	0.0175599	1.10284
ILMN_1799134	KLRD1	0.0065412	1.10249
ILMN_1722838	MRPL46	0.0493996	1.1017
ILMN_1681678	CTDSP1	0.0129272	1.10153
ILMN_1733932	RNUT1	0.0351858	1.1015
ILMN_1801302	SCN1B	0.0316405	1.1011
ILMN_1779356	TP53	0.0294234	1.09967
ILMN_1760374	CD8A	0.0257615	1.0993
ILMN_1809708	KCTD21	0.00801479	1.09912
ILMN_1874530		0.0187633	1.09799
ILMN_1770742	TMEM55B	0.0497592	1.09744
ILMN_1683239	RASSF1	0.0331017	1.09743
ILMN_1659158	SAMD3	0.0371675	1.09737
ILMN_1709635	SLC38A11	0.037142	1.09701
ILMN_1684943	TRAT1	0.0150337	1.09557
ILMN_1753164	IPO8	0.0149782	1.09463
ILMN_1751904	EDNRB	0.0392307	1.09345
ILMN_1780598	PIAS1	0.0399572	1.09345
ILMN_1653646	UBL7	0.047821	1.0934
ILMN_1710001	RPL41	0.0165028	1.09258
ILMN_1721629	ZNF654	0.0408152	1.09061
ILMN_1753525	TCEAL7	0.0303635	1.09032
ILMN_1808047	PHC2	0.0213225	1.08976
ILMN_1736546	SLC16A14	0.0471109	1.08957
ILMN_1761850	ATRN	0.0424823	1.08715
ILMN_1675268	LRP4	0.0201629	1.08706
ILMN_1736806	PAG1	0.0411606	1.08625
ILMN_1726554	IREB2	0.0397661	1.08542
ILMN_1691334	TXNDC3	0.0219694	1.08454
ILMN_1674768	LOC220686	0.0431973	1.08384
ILMN_1754423	C3orf23	0.0268365	1.08205
ILMN_1664660	GAGE2	0.0377608	1.0809
ILMN_1662768	NHEDC2	0.0313304	1.0808
ILMN_1766261	SLC2A12	0.0185929	1.0801
ILMN_1742929	HESX1	0.0188517	1.0797
ILMN_1694486	TCIRG1	0.0283807	1.07928
ILMN_1699908	IL12RB1	0.011839	1.07924
ILMN_1761939	TIPIN	0.0294772	1.07868
ILMN_1739985	TAGAP	0.0188031	1.07727
ILMN_1752639	SLC25A24	0.0416192	1.07535
ILMN_1725043	ADAL	0.0240914	1.07466
ILMN_1784203	ACRBP	0.0158089	1.07392
ILMN_1705141	CACYBP	0.0250886	1.07344
ILMN_1805985	ANKRD32	0.0379533	1.07241
ILMN_1723232	LOC96610	0.0294117	1.07169
ILMN_1654421	MPHOSPH9	0.0455361	1.06966
ILMN_1781028	ZMYM5	0.0241196	1.06946
ILMN_1750294	ADAM7	0.0321018	1.06917
ILMN_1723815	LOC649270	0.027215	1.06845
ILMN_1772646	LOC388681	0.02765	1.06805
ILMN_1802192	C10orf99	0.0236033	1.06763
ILMN_1696946	LOC654174	0.0424417	1.06663
ILMN_1722698	RCHY1	0.0390357	1.0655
ILMN_1703009	FAM20C	0.0191042	1.06539
ILMN_1800381	GNAO1	0.0361792	1.06536
ILMN_1751075	SETD4	0.0472574	1.06527
ILMN_1804454	FAM135A	0.0320622	1.06505
ILMN_1671092	SOX17	0.0488278	1.06479
ILMN_1799889	ATP6V0D2	0.0449583	1.06448
ILMN_1792107	ERCC8	0.0318894	1.06354
ILMN_1823555		0.0240517	1.06344
ILMN_1808956	C15orf27	0.0224722	1.06053
ILMN_1679782	BLOC1S2	0.0317038	1.05631
ILMN_1724708	RAB33A	0.0330897	1.05612
ILMN_1684255	MYL4	0.0247309	1.04603
ILMN_1727199	KLC4	0.0480922	1.04437
ILMN_1913759		0.0465185	-1.05087
ILMN_1699179	FALZ	0.0325119	-1.05323
ILMN_1819690		0.0495974	-1.05354
ILMN_1688317	ZNF160	0.0402841	-1.0558
ILMN_1718079	HOXB1	0.0384563	-1.05834
ILMN_1745988	NUDT12	0.0281829	-1.05921
ILMN_1701468	HGFAC	0.0481228	-1.05967
ILMN_1667578	DUSP26	0.0465982	-1.06
ILMN_1730256	GNG13	0.0235956	-1.06007
ILMN_1789786	CCDC56	0.0295707	-1.06057
ILMN_1681154	ZBTB39	0.042069	-1.0607
ILMN_1707710	SLC6A13	0.014903	-1.06113
ILMN_1764091	R3HDM2	0.0458698	-1.0623
ILMN_1686043	C14orf140	0.0253289	-1.06583
ILMN_1740585	UMOD	0.0166752	-1.06812
ILMN_1736747	MARK2	0.0204903	-1.06972
ILMN_1697773	ZNF517	0.0496529	-1.07052
ILMN_1743673	LOC645332	0.0328679	-1.07085
ILMN_1752455	DOCK5	0.0495048	-1.07221
ILMN_1730631	C2orf44	0.0435391	-1.07322
ILMN_1655645	AK2	0.0388566	-1.07442
ILMN_1777579	TIGD1	0.0405216	-1.07493
ILMN_1700679	LOC649661	0.0263691	-1.07611
ILMN_1681812	HIF1AN	0.0473433	-1.07739
ILMN_1789991	2004-03-01	0.0270325	-1.07761
ILMN_1663381	TRAF3IP2	0.00732733	-1.07763
ILMN_1672066	C20orf194	0.0335904	-1.07788
ILMN_1702044	CNTROB	0.0154139	-1.0784
ILMN_1671055	GSG1L	0.0482549	-1.07938
ILMN_1895548		0.026552	-1.07957
ILMN_1789944	MGC5352	0.0299341	-1.08028
ILMN_1692834	C1orf26	0.0377059	-1.08159
ILMN_1688246	LOC642852	0.0364421	-1.08607
ILMN_1689932	WDR85	0.0205533	-1.08658
ILMN_1882248		0.0105934	-1.08942
ILMN_1807807	FAM33A	0.0151142	-1.08947
ILMN_1726752	APTX	0.0474277	-1.08982
ILMN_1817255		0.0217311	-1.09099
ILMN_1875380		0.0218249	-1.09143
ILMN_1677765	LRP8	0.0484994	-1.09166
ILMN_1711289	GYS1	0.0315352	-1.09234
ILMN_1741398	KIAA0406	0.0387375	-1.09251
ILMN_1764503	C21orf124	0.00911704	-1.09347
ILMN_1761560	PHF13	0.0297926	-1.09575
ILMN_1851299		0.0480341	-1.09599
ILMN_1651504	C4orf8	0.0242851	-1.09632
ILMN_1771815	C20orf43	0.0153979	-1.09639
ILMN_1759870	LOC653066	0.0305619	-1.09643
ILMN_1771397	SSX9	0.00411214	-1.09656
ILMN_1791436	EZH1	0.0358999	-1.09659
ILMN_1772446	C12orf34	0.039202	-1.09754
ILMN_1728999	LOC651369	0.0232039	-1.09765
ILMN_1683441	NCAPD3	0.0275619	-1.09817
ILMN_1777513	KCTD11	0.0160909	-1.0983
ILMN_1682912	FLJ45445	0.034256	-1.09858
ILMN_1656196	E2F6	0.0325344	-1.09881
ILMN_1754655	TTLL5	0.0270068	-1.10008
ILMN_1662681	AMBRA1	0.0288322	-1.10012
ILMN_1787514	CAPN12	0.0407285	-1.10053
ILMN_1776038	UBXN2A	0.0225058	-1.10075
ILMN_1667928	BRDT	0.0492262	-1.10122
ILMN_1901934		0.0435714	-1.1032
ILMN_1734317	DPF2	0.0227828	-1.10348
ILMN_1671217	LOC440733	0.0281154	-1.10354
ILMN_1654289	ELK1	0.0430642	-1.10367
ILMN_1747271	ATP1B2	0.00263231	-1.10384
ILMN_1722397	LOC389906	0.0480417	-1.10441
ILMN_1744628	MGC19604	0.0471554	-1.10465
ILMN_1683052	PTRH2	0.0178997	-1.10602
ILMN_1764609	PWWP2	0.0365602	-1.10643
ILMN_1671913	TRMT2A	0.031507	-1.10685
ILMN_1724581	EDC3	0.0452606	-1.10695
ILMN_1781966	OSBP2	0.0349649	-1.10698
ILMN_1732885	BTBD12	0.0463506	-1.10738
ILMN_1804263	ZNF76	0.0475648	-1.10763
ILMN_1682495	FOXP1	0.0438143	-1.1077
ILMN_1894057		0.0404214	-1.10813
ILMN_1766309	ANKRD54	0.0450829	-1.10829
ILMN_1911059		0.0204322	-1.10858
ILMN_1748884	TOB2	0.0451363	-1.10864
ILMN_1658957	LOC643635	0.0253956	-1.10889
ILMN_1662719	GPBP1L1	0.0358294	-1.10923
ILMN_1660844	INTS4	0.0153103	-1.10998
ILMN_1813938	CHCHD4	0.0331003	-1.11002
ILMN_1685002	RCE1	0.0389441	-1.11053
ILMN_1811480	ADPRHL2	0.0306319	-1.11224
ILMN_1721963	MEN1	0.0271755	-1.11234
ILMN_1662192	ZNF248	0.0443341	-1.11283
ILMN_1753490	C10orf39	0.0257277	-1.11287
ILMN_1800390	ZNF511	0.0231047	-1.11353
ILMN_1668185	ZNF282	0.0475907	-1.11357
ILMN_1782829	GLTSCR1	0.0471109	-1.1138
ILMN_1782751	GLI4	0.0314141	-1.11395
ILMN_1678998	LRRC14	0.0188503	-1.11398
ILMN_1700606	RNF43	0.0389957	-1.11427
ILMN_1727553	LOC63920	0.0499487	-1.11447
ILMN_1746375	CSNK2A1P	0.0348155	-1.11478
ILMN_1768930	U2AF2	0.0253782	-1.11534
ILMN_1722953	USP47	0.0301492	-1.11572
ILMN_1651712	RBM11	0.0176943	-1.11579
ILMN_1718950	ZNF433	0.0243683	-1.11606
ILMN_1660376	LOC642209	0.0379272	-1.11644
ILMN_1814967	FLJ14082	0.00107513	-1.1169
ILMN_1676745	ZNF142	0.0112198	-1.11699
ILMN_1725906	C1orf104	0.0387753	-1.11747
ILMN_1814173	SMARCA4	0.0401165	-1.11824
ILMN_1731043	TRA2A	0.0381111	-1.11846
ILMN_1723743	ROM1	0.0470162	-1.11947
ILMN_1809944	TRMT12	0.0380004	-1.11989
ILMN_1777476	SPDYC	0.0466635	-1.12004
ILMN_1811029	TLK1	0.0497138	-1.12017
ILMN_1724306	CACNG1	0.0173493	-1.1207
ILMN_1700507	CLASP1	0.0256698	-1.12083
ILMN_1719656	MRPL38	0.0269752	-1.12201
ILMN_1771039	GTSE1	0.0360075	-1.12302
ILMN_1803317	C9orf114	0.0315024	-1.12304
ILMN_1883050		0.00313677	-1.12332
ILMN_1721128	TOMM34	0.0219629	-1.12347
ILMN_1811648	DCAKD	0.0496416	-1.12349
ILMN_1779399	SNRPA	0.0342685	-1.12355
ILMN_1786388	RNF113A	0.0245677	-1.12365
ILMN_1718706	ERAL1	0.00947868	-1.12371
ILMN_1696675	CES2	0.0261586	-1.1242
ILMN_1676322	C1orf172	0.0350247	-1.12477
ILMN_1663954	TH1L	0.0445156	-1.12501
ILMN_1715718	ZNF784	0.0109377	-1.12542
ILMN_1736500	GNB2L1	0.0119105	-1.12555
ILMN_1653404	NKIRAS2	0.0277081	-1.12654
ILMN_1730698	ODF2	0.043551	-1.12668
ILMN_1709114	MAP3K7IP1	0.0421988	-1.12686
ILMN_1667857	C12orf52	0.0327148	-1.12744
ILMN_1813775	GAK	0.049253	-1.12759
ILMN_1714592	CDA	0.0128536	-1.1279
ILMN_1772713	BMS1	0.00907954	-1.12816
ILMN_1774890	LAS1L	0.0327993	-1.12821
ILMN_1772981	EPN1	0.00780311	-1.12829
ILMN_1655154	PTBP1	0.0442453	-1.12858
ILMN_1737847	RMND5B	0.0205262	-1.12863
ILMN_1692620	ZNF263	0.016502	-1.12877
ILMN_1741334	ZNFN1A4	0.0419762	-1.12889
ILMN_1708946	VPS4A	0.0432763	-1.1289
ILMN_1791884	LOC128439	0.0496461	-1.12903
ILMN_1695962	SLC12A9	0.0330369	-1.12909
ILMN_1703246	SBF1	0.0447083	-1.12911
ILMN_1731113	ZBTB43	0.0345351	-1.12932
ILMN_1697735	EWSR1	0.0437295	-1.12951
ILMN_1657893	TXNRD2	0.0491944	-1.13009
ILMN_1679949	SLC25A23	0.0207481	-1.13078
ILMN_1815937	MGC9712	0.0470592	-1.13085
ILMN_1672295	ZC3H12A	0.0421741	-1.13257
ILMN_1712517	ZNF696	0.0137869	-1.13265
ILMN_1777528	NCBP1	0.0197553	-1.13267
ILMN_1714710	CCDC120	0.010048	-1.13268
ILMN_1704101	HSF4	0.0461746	-1.13283
ILMN_1714438	MUTYH	0.0236966	-1.13293
ILMN_1813236	C6orf136	0.0415492	-1.13304
ILMN_1771957	MAN1B1	0.0262356	-1.13311
ILMN_1805853	LOC653583	0.0174786	-1.13358
ILMN_1747119	FBXO46	0.0422199	-1.13376
ILMN_1692575	SFRS8	0.0355695	-1.13383
ILMN_1779404	PUF60	0.0227245	-1.13509
ILMN_1656487	FGA	0.01484	-1.13515
ILMN_1739618	ZNF408	0.0284649	-1.13516
ILMN_1763436	SETX	0.0225614	-1.13525
ILMN_1729767	TARBP2	0.0380481	-1.1353
ILMN_1883298		0.0155478	-1.13562
ILMN_1753275	DENND1A	0.0129698	-1.13583
ILMN_1680693	ZNF419	0.0103859	-1.13584
ILMN_1743767	ZNF446	0.019601	-1.1359
ILMN_1711368	NIBP	0.0356743	-1.1359
ILMN_1791106	ABC1	0.0369427	-1.13617
ILMN_1696276	ZNF653	0.02016	-1.13658
ILMN_1762835	HELZ	0.0134913	-1.13659
ILMN_1804490	PRKRIP1	0.0255136	-1.13668
ILMN_1658080	ZNF573	0.0299532	-1.1368
ILMN_1658885	DAGLB	0.041821	-1.1372
ILMN_1687303	ACAD10	0.00592906	-1.13755
ILMN_1682783	TUG1	0.0388565	-1.13757
ILMN_1790202	C1orf35	0.0190566	-1.13762
ILMN_1693669	WDR79	0.0235497	-1.13763
ILMN_1799815	XYLT2	0.017203	-1.13792
ILMN_1660186	SYF2	0.00571648	-1.13815
ILMN_1771019	MTMR4	0.0270371	-1.13899
ILMN_1653896	ATRIP	0.0289412	-1.13922
ILMN_1792314	ACTR1A	0.036684	-1.13955
ILMN_1689528	ZNF136	0.0264847	-1.13962
ILMN_1750052	NOL14	0.023393	-1.13967
ILMN_1729123	PPP2R4	0.00910216	-1.14021
ILMN_1783798	GAS8	0.0386439	-1.14066
ILMN_1774086	CBX3	0.0127715	-1.1407
ILMN_1667222	MTX1	0.0302601	-1.14087
ILMN_1795876	GPS1	0.00806517	-1.1412
ILMN_1662198	RANGAP1	0.0183538	-1.14151
ILMN_1714327	SETD1A	0.0380094	-1.14177
ILMN_1799575	IL19	0.0257098	-1.14183
ILMN_1675150	HKR1	0.0295625	-1.1419
ILMN_1778557	CDC2L5	0.0313327	-1.14193
ILMN_1662161	TBC1D13	0.0214915	-1.14199
ILMN_1747223	FRYL	0.029129	-1.14215
ILMN_1676302	FAM113A	0.00659915	-1.14234
ILMN_1695461	PTPRA	0.0237093	-1.14259
ILMN_1694111	PNKP	0.0431935	-1.14269
ILMN_1781097	UBXD2	0.0445792	-1.14271
ILMN_1744508	FAM53C	0.015649	-1.14281
ILMN_1810147	ZNF524	0.0284338	-1.14285
ILMN_1802843	PRCC	0.0203162	-1.14314
ILMN_1688534	EIF2B5	0.0192372	-1.14328
ILMN_1812856	ZSWIM1	0.0268738	-1.14332
ILMN_1683470	TMEM139	0.0205405	-1.14341
ILMN_1726456	SLC3A2	0.0226464	-1.14351
ILMN_1747506	DHX34	0.0134272	-1.14393
ILMN_1802753	TSSC4	0.0402073	-1.14425
ILMN_1767960	NSUN7	0.0209481	-1.14446
ILMN_1724811	PARN	0.00848207	-1.14465
ILMN_1769517	PRKDC	0.0241324	-1.14491
ILMN_1690653	CDK2AP2	0.0341098	-1.14587
ILMN_1689652	RNMTL1	0.00471776	-1.14603
ILMN_1766346	ZNF512B	0.00170688	-1.14607
ILMN_1786396	ZZEF1	0.0146515	-1.14624
ILMN_1808356	FAM3A	0.0127609	-1.14625
ILMN_1784717	RPS19	0.0121862	-1.14647
ILMN_1743396	ACOX3	0.0409128	-1.14652
ILMN_1691949	THOC3	0.0367485	-1.14664
ILMN_1711270	SFRS14	0.0272219	-1.14665
ILMN_1666512	SKIV2L	0.0238615	-1.14683
ILMN_1777096	TDG	0.0146814	-1.14703
ILMN_1677877	UBE2L3	0.0119425	-1.14805
ILMN_1726520	TDP1	0.029761	-1.14819
ILMN_1661194	CLDN14	0.0444932	-1.14826
ILMN_1797933	MRPL17	0.0157319	-1.14827
ILMN_1808999	ARHGEF19	0.0242957	-1.14847
ILMN_1656066	TNPO2	0.0248372	-1.14875
ILMN_1723158	NOL1	0.0152673	-1.14899
ILMN_1746252	POLD2	0.0356703	-1.14936
ILMN_1763364	WHDC1	0.0358818	-1.14951
ILMN_1678678	SLC37A4	0.0125542	-1.14963
ILMN_1695983	DDX42	0.034362	-1.14993
ILMN_1703743	AATF	0.0226509	-1.15051
ILMN_1660582	LIG3	0.0011489	-1.15054
ILMN_1813423	FLJ14154	0.013784	-1.15109
ILMN_1787256	HCN3	0.0178948	-1.15119
ILMN_1790953	TBCB	0.021323	-1.1512
ILMN_1720124	RCC2	0.0302375	-1.15179
ILMN_1810467	PPP2R1A	0.0295244	-1.15181
ILMN_1791388	ZNF787	0.00749767	-1.15193
ILMN_1655684	SARS2	0.0371572	-1.15204
ILMN_1704065	LOC400768	0.0351334	-1.15208
ILMN_1765532	RDBP	0.0448111	-1.15214
ILMN_1665538	SKP2	0.0167056	-1.15229
ILMN_1694686	KIAA0194	0.00833403	-1.15338
ILMN_1815666	ATP2A2	0.0346408	-1.1535
ILMN_1724194	NPEPL1	0.0407688	-1.1539
ILMN_1762312	FOXRED1	0.0201004	-1.15395
ILMN_1755737	TRABD	0.0195986	-1.15437
ILMN_1793712	SCAMP3	0.029151	-1.15459
ILMN_1743204	DUSP8	0.0368555	-1.15478
ILMN_1688178	RRP7A	0.0428875	-1.15481
ILMN_1815086	NINJ1	0.009587	-1.15534
ILMN_1719998	C9orf45	0.0418601	-1.15541
ILMN_1708906	C2orf29	0.0154042	-1.15564
ILMN_1722774	VPS72	0.0183803	-1.15572
ILMN_1729281	SPHK2	0.00526769	-1.15595
ILMN_1691487	TRAF2	0.0104176	-1.15614
ILMN_1673753	LOC642033	0.0236561	-1.15622
ILMN_1732171	LOC652685	0.0121469	-1.15627
ILMN_1769155	CYP2C8	0.0182325	-1.15695
ILMN_1675577	C14orf172	0.0294863	-1.15741
ILMN_1761138	C9orf142	0.0178951	-1.1575
ILMN_1773763	MTA2	0.0329697	-1.1575
ILMN_1816713		0.0463085	-1.15751
ILMN_1768506	MAPK15	0.0162941	-1.1576
ILMN_1763723	PTDSS2	0.00885852	-1.15764
ILMN_1762549	ORAOV1	0.0335401	-1.15769
ILMN_1769634	STRA13	0.0477622	-1.1577
ILMN_1677843	RAB24	0.0436621	-1.15778
ILMN_1808059	BCAS4	0.0409303	-1.15819
ILMN_1734312	GCN1L1	0.0357283	-1.15829
ILMN_1760628	C9orf86	0.0417526	-1.1584
ILMN_1710954	LOC283932	0.0316815	-1.15848
ILMN_1654653	KNS2	0.00373969	-1.15849
ILMN_1766185	AXIN1	0.025346	-1.15877
ILMN_1806349	SLC6A8	0.0475515	-1.15889
ILMN_1782273	N4BP2	0.0142668	-1.15939
ILMN_1726989	C1orf86	0.0322992	-1.15971
ILMN_1698478	SNAPC2	0.0456382	-1.15984
ILMN_1727142	IKBKB	0.0267068	-1.15995
ILMN_1810000	RDH16	0.042104	-1.15997
ILMN_1751081	EHMT2	0.024687	-1.16051
ILMN_1773855	CPT1C	0.024645	-1.16058
ILMN_1791069	ZNF513	0.0172804	-1.16075
ILMN_1737211	ZNF585A	0.0243571	-1.1608
ILMN_1700604	RBM14	0.0353057	-1.16082
ILMN_1680129	NSUN2	0.0485507	-1.16102
ILMN_1810922	PCNT2	0.0300815	-1.16126
ILMN_1674874	TETRAN	0.00985797	-1.16222
ILMN_1712095	MLLT7	0.0121353	-1.16237
ILMN_1747303	DDX39	0.00544341	-1.16259
ILMN_1743770	SLC25A14	0.0214113	-1.16261
ILMN_1736752	COMTD1	0.0298908	-1.16264
ILMN_1697682	RECQL5	0.035279	-1.16266
ILMN_1667016	FAF1	0.00747876	-1.16283
ILMN_1799672	CROCC	0.0426518	-1.16284
ILMN_1662130	POM121	0.00464792	-1.16292
ILMN_1727458	HDAC1	0.00749413	-1.16323
ILMN_1753426	KIAA0556	0.00970136	-1.16324
ILMN_1718619	TRIM11	0.0158999	-1.1642
[truncated: 278 more rows]

## Sheet: F vs C (CLINICAL GO SETS=1969)
GO ID	Corrected p-value (Post- vs. Pre-Fulvestrant)	Fold-Change (Post- vs. Pre-Fulvestrant)	Number of genes	Type	GO Description
[truncated: 1,969 more rows]

[truncated: 5 more sheets: F vs C (IN VITRO GO SETS=4176), ED vs C (CLINICAL GO SETS=2583), ED vs C (IN VITRO GO SETS=3051), F vs ED (IN VITRO GO SETS=2560), F vs ED (CLINICAL GO SETS=490)]
